# Supplementary material for: Reconstruction of Diploid High-Order 3D Genome Interactions from Long Noisy Concatemers
Source: Research Square preprint supplement (doi:10.21203/rs.3.rs-3486881/v1), 2024-10-30
Supplement: Supplementary file 1 [file 13116a7d4924f29110e65ec2.xlsx]

## Sheet: Table S1
Supplementary Table 1. Summary of Pore-C datasets.
Flow cell	Library strategy	Reads passing quality control	Passed bases (Gb)	Mean read length (bp)	Read length N50 (bp)	Falign Mapped read count	Mean fragment numbers per read	Median fragment numbers per read	Mean fragment length (bp)	Median fragment length (bp)	Pairwise contacts
HG001_S1	ordinary Pore-C	14973831	69919454059	4669.4	5283	14961541	4.081	4	1127.8	774	139553319
HG001_S2	ordinary Pore-C	17229726	76347519645	4431.2	5218	17199700	3.939	3	1101.87	752	152368100
HG001_S3	ordinary Pore-C	9889468	59777975176	6044.6	7064	9876855	5.482	5	1075.34	717	185023579
HG001_S4	ordinary Pore-C	4550157	35505363496	7803.1	9782	4541933	6.727	6	1126.49	739	134928086
HG001_S5	ordinary Pore-C	23812792	74157949167	3114.2	4926	23771402	3.316	2	919.109	627	188333271
HG001_S6	ordinary Pore-C	13257208	58626154300	4420	5352	13044848	5.472	4	760.867	541	270397952
HG001_S7	high throughput Pore-C	13079250	83328132568	6371	8130	13060962	8.509	7	723.728	514	654657884
HG001_S8	high throughput Pore-C	22197025	109760897566	4944.8	5571	18158650	5.803	5	818.071	567	353645049
HG002_S1	ordinary Pore-C	15179760	79107406456	5211.4	5822	15178279	6.301	6	797.841	567	343161151
HG002_S2	high throughput Pore-C	18605286	95986645876	5159.1	5739	18602338	6.254	6	796.726	566	413105823
HG002_S3	high throughput Pore-C	40852702	107127984082	2622.3	4771	40840963	3.417	2	742.037	508	411436968
HG002_S4	high throughput Pore-C	29864241	143684928050	4811.3	5468	29859616	5.48	5	859.435	603	510665398
6J_PWK_S1	high throughput Pore-C	15355294	63567479577	4139.8	4369	15319863	4.684	4	811.175	562	185885462
6J_PWK_S2	high throughput Pore-C	19211955	83748199316	4359.2	4813	19193780	5.146	5	817.011	569	294022377

## Sheet: Table S2
Supplementary Table 2. Runtime performance of Dip3D. The experiments are carried out on a computer equipped with 2 AMD EPYC 7402 24-Core processors (1.5GHz-2.8GHz) and 256GB RAM.
Methods	Dataset	Reads	Bases (Gbp)	Wall clock time (hour)	Peak RAM usage (GB)
O-Pore-C#	HG001	122165407	572	274.29	18.97
	HG002	104501989	426	208.65	20.12
Dip3d	HG001	122165407	572	25.51	73.36
	HG002	104501989	426	24.12	69.32
#O-Pore-C denotes the approach applied in the original Pore-C study.

## Sheet: Table S3
Supplemetary Table 3. Performance of Cliar3 models on SNV calling from Pore-C data.
Sample	Depth	Data type	Clair3 Model#	Recall	Precision	F1 score
HG001	30×	ONT genome sequencing (Guppy v4.5.0)	r941_prom_hac_g360+g422 WGS	0.997	0.996	0.996
		Pore-C (Guppy v4.5.0)	r941_prom_hac_g360+g422 WGS	0.698	0.728	0.712
		Pore-C (Guppy v4.5.0)	guppy4 Pore-C-model	0.966	0.962	0.964
		Pore-C (Guppy v6.5.7)	guppy6 Pore-C-model	0.975	0.995	0.985
	60×	ONT genome sequencing (Guppy v4.5.0)	r941_prom_hac_g360+g422 WGS	0.999	0.997	0.998
		Pore-C (Guppy v4.5.0)	r941_prom_hac_g360+g422 WGS	0.708	0.79	0.747
		Pore-C (Guppy v4.5.0)	guppy4 Pore-C-model	0.981391	0.981848	0.981619
		Pore-C (Guppy v6.5.7)	guppy6 Pore-C-model	0.985	0.998	0.991
	90×	ONT genome sequencing (Guppy v4.5.0)	r941_prom_hac_g360+g422 WGS	0.999	0.997	0.998
		Pore-C (Guppy v4.5.0)	r941_prom_hac_g360+g422 WGS	0.711	0.808	0.756
		Pore-C (Guppy v4.5.0)	guppy4 Pore-C-model	0.984507	0.986228	0.985367
		Pore-C (Guppy v6.5.7)	guppy6 Pore-C-model	0.986	0.998	0.992
HG002	30×	ONT genome sequencing (Guppy v4.5.0)	r941_prom_hac_g360+g422 WGS	0.997	0.995	0.996
		Pore-C (Guppy v4.5.0)	r941_prom_hac_g360+g422 WGS	0.876	0.882	0.879
		Pore-C (Guppy v4.5.0)	guppy4 Pore-C-model	0.953917	0.952491	0.953204
		Pore-C (Guppy v6.5.7)	guppy6 Pore-C-model	0.978	0.994	0.986
	60×	ONT genome sequencing (Guppy v4.5.0)	r941_prom_hac_g360+g422 WGS	0.999	0.994	0.997
		Pore-C (Guppy v4.5.0)	r941_prom_hac_g360+g422 WGS	0.921	0.937	0.929
		Pore-C (Guppy v4.5.0)	guppy4 Pore-C-model	0.971954	0.97442	0.973186
		Pore-C (Guppy v6.5.7)	guppy6 Pore-C-model	0.984	0.996	0.99
	90×	ONT genome sequencing (Guppy v4.5.0)	r941_prom_hac_g360+g422 WGS	0.999	0.994	0.997
		Pore-C (Guppy v4.5.0)	r941_prom_hac_g360+g422 WGS	0.939	0.95	0.945
		Pore-C (Guppy v4.5.0)	guppy4 Pore-C-model	0.975663	0.979367	0.977511
		Pore-C (Guppy v6.5.7)	guppy6 Pore-C-model	0.986	0.997	0.991
#Guppy4 and gupp6 Pore-C models were trained on Pore-C data base-called using Guppy v4.5.0 and v6.5.7 versions, respectively. 'r941_prom_hac_g360+g422 WGS' is the original Clair3 model trained using nanopore whole-genome sequencing (WGS).

## Sheet: Table S4
Supplementary Table 4. Evaluation of Pore-C SNV phasing. Hi-C based SNV phasing results by HapCUT2 are also included for comparison. #SNV source: Pore-C model denotes the SNVs called using the our SNV calling model trained using Pore-C data, and GIAB denotes using the unphased heterozygous variants from the GIAB variant set (v3.3.2) of HG001.
Chromosome	Data	SNV source#	Sequencing depth	Phased blocks	Phased variants	Unphased variants	% of variants phased	Phased variants in MVP block	% of phased variants in MVP block	MVP block length (bp)	% of chromosome spanned in MVP block	Chromosome length (bp)	% of N bases in chromosome	% of alignment gaps in chromosome (depth >= 1)	% of alignment gaps in chromosome (depth >= 10)	Switch error rate (%)	Hamming error rate (%)
Autosomes (1-22)	Pore-C	Pore-C model	30	12974	2099379	88116	95.04-97.41	/	97.19-98.94	/	79.29-99.99	/	0.1-27.1	0.36-27.93	1.04-27.93	0.59	0.44
			60	7576	2223413	59109	96.69-98.38	/	98.31-99.52	/	79.29-99.99			0.26-27.15	0.73-27.38	0.4	0.31
			90	6115	2265619	49890	97.22-98.72	/	98.49-99.60	/	79.29-99.99			0.19-27.15	0.60-27.27	0.36	0.28
		GIAB	30	17036	2052261	69321	96.16-97.37	/	97.45-98.47	/	61.05-99.89			0.36-27.93	1.04-27.93	0.8	0.59
			60	12038	2070722	51030	97.04-98.14	/	98.23-98.95	/	61.05-99.89			0.26-27.15	0.73-27.38	0.61	0.44
			90	10343	2077620	44181	97.47-98.34	/	98.41-99.07	/	61.05-99.89			0.19-27.15	0.60-27.27	0.54	0.4
	Hi-C	GIAB	30	132143	1205425	916558	51.5-70.0	/	51.7-92.1	/	48.1-99.9			4.2-27.8	15.5-38.8	2.45	6.73
			60	50284	1487926	634083	67.1-76.3	/	88.2-96.2	/	61.0-99.9			1.8-27.8	12.0-34.0	0.92	0.69
			90	34129	1576995	545016	72.1-78.4	/	93.1-97.0	/	61.0-99.9			1.1-27.6	10.0-32.8	0.6	0.45
			531	13825	1743771	378242	81.3-84.4	/	97.4-99.0	/	61.0-99.9			/	/	0.41	0.32
1	Pore-C	Pore-C model	30	1402	155900	7999	95.09	151730	97.33	248896208	99.98	248956422	7.4	7.73	8.78	0.87	0.66
			60	883	166268	5560	96.75	163498	98.33	248935178	99.99			7.6	8.35	0.67	0.54
			90	670	170018	4669	97.31	167909	98.76	248923183	99.99			7.57	8.18	0.62	0.5
		GIAB	30	1540	164839	6286	96.31	161131	97.75	247940786	99.59			7.73	8.78	1.11	0.83
			60	1107	166511	4621	97.29	163900	98.43	247961670	99.6			7.6	8.35	0.93	0.7
			90	973	167197	3944	97.69	164910	98.63	247962408	99.6			7.57	8.18	0.85	0.65
	Hi-C	GIAB	30	9944	98412	72745	57.4981	70850	71.9933	247905241	99.6			11.18	25.52	2.79	48.9
			60	3778	120680	50477	70.5084	111782	92.6268	247971673	99.6			8.81	19.03	1.04	0.76
			90	2508	127534	43623	74.5129	121750	95.4647	247970935	99.6			8.19	17.17	0.78	0.59
			531	1060	140253	30904	81.9441	137668	98.1569	248011394	99.6			/	/	0.64	0.51
2	Pore-C	Pore-C model	30	1076	167420	7804	95.52	164827	98.45	242135743	99.98	242193529	0.7	1.3	1.81	0.41	0.25
			60	603	176392	5225	97.11	174934	99.17	242172028	99.99			1.25	1.55	0.18	0.12
			90	511	180044	4423	97.6	178851	99.34	242171936	99.99			1.2	1.48	0.13	0.08
		GIAB	30	1499	166112	6202	96.38	162431	97.78	227594568	93.97			1.3	1.81	0.56	0.36
			60	1053	167793	4538	97.35	165252	98.49	237703249	98.15			1.25	1.55	0.35	0.22
			90	898	168330	4003	97.67	166152	98.71	237703249	98.15			1.2	1.48	0.27	0.16
	Hi-C	GIAB	30	11471	94764	77589	54.9825	62195	65.6315	234963740	97			5.52	23.47	4.36	41.05
			60	4210	119146	53207	69.1291	109267	91.7085	234963740	97			2.45	15.02	0.56	0.38
			90	2799	126969	45384	73.668	120544	94.9397	234963740	97			1.62	12.73	0.33	0.23
			531	1134	141375	30978	82.0264	138608	98.0428	241994639	99.9			/	/	0.12	0.08
3	Pore-C	Pore-C model	30	789	140407	6292	95.69	138431	98.59	198212889	99.96	198295559	0.1	0.37	1.31	0.39	0.3
			60	459	147691	4183	97.24	146486	99.18	198204077	99.95			0.26	0.96	0.22	0.17
			90	363	150866	3520	97.71	149885	99.35	198193639	99.95			0.19	0.81	0.19	0.16
		GIAB	30	1382	153728	5601	96.46	150374	97.82	197990047	99.85			0.37	1.31	0.52	0.36
			60	1003	155238	4102	97.41	152852	98.46	197990047	99.85			0.26	0.96	0.33	0.23
			90	846	155793	3554	97.75	153742	98.68	197990047	99.85			0.19	0.81	0.28	0.22
	Hi-C	GIAB	30	11070	85843	73529	53.8633	54154	63.0849	197987985	99.8			5.42	24.51	2.32	1.84
			60	4066	109235	50136	68.5413	99603	91.1823	197992036	99.8			1.99	15.44	0.7	0.52
			90	2710	116456	42915	73.0723	110186	94.616	197992036	99.8			1.09	13.12	0.4	0.29
			531	1102	130088	29284	81.6254	127390	97.926	197993074	99.8			/	/	0.14	0.13
4	Pore-C	Pore-C model	30	722	145835	5839	96.14	143785	98.59	190187896	99.99	190214555	0.2	0.62	1.44	0.29	0.19
			60	411	154025	3787	97.6	152821	99.22	190190023	99.99			0.5	1.1	0.12	0.07
			90	326	156566	3265	97.95	155731	99.47	190189709	99.99			0.45	1	0.08	0.05
		GIAB	30	949	130700	4304	96.79	128407	98.25	181154634	95.24			0.62	1.44	0.46	0.28
			60	674	131843	3177	97.64	130227	98.77	181154634	95.24			0.5	1.1	0.25	0.16
			90	578	132240	2780	97.93	130871	98.96	181154634	95.24			0.45	1	0.2	0.12
	Hi-C	GIAB	30	11102	69568	65462	51.5204	35999	51.7465	181151717	95.2			6.48	28.74	4	4.22
			60	4349	90513	44517	67.0318	79829	88.1962	181154288	95.2			2.64	17.28	0.66	0.45
			90	2855	97356	37674	72.0995	90619	93.08	181154288	95.2			1.57	14.7	0.3	0.2
			531	1166	110333	24697	81.71	107448	97.3852	181154593	95.2			/	/	0.13	0.09
5	Pore-C	Pore-C model	30	774	134502	5632	95.96	132546	98.55	181463886	99.96	181538259	1.4	1.58	2.24	0.34	0.22
			60	450	142068	3796	97.39	140968	99.23	181465237	99.96			1.53	1.9	0.19	0.13
			90	353	145134	3253	97.8	144290	99.42	181465226	99.96			1.51	1.79	0.12	0.08
		GIAB	30	1053	136452	4375	96.87	133906	98.13	181107873	99.76			1.58	2.24	0.48	0.33
			60	747	137634	3201	97.71	135849	98.7	181107873	99.76			1.53	1.9	0.29	0.18
			90	652	138098	2739	98.04	136535	98.87	181107873	99.76			1.51	1.79	0.24	0.15
	Hi-C	GIAB	30	9563	76711	64143	54.4614	49925	65.0819	181167727	99.8			6.59	25.49	2.44	2.02
			60	3522	97066	43788	68.9125	88767	91.4501	181167727	99.8			3.34	16.19	0.48	0.31
			90	2333	103424	37430	73.4264	98041	94.7952	181167727	99.8			2.46	13.89	0.29	0.18
			531	1000	115475	25379	81.9821	113046	97.8965	181207969	99.8			/	/	0.14	0.1
6	Pore-C	Pore-C model	30	623	141763	5126	96.5	140255	98.94	170632492	99.9	170805979	0.4	0.51	1.04	1.29	1.48
			60	336	149544	3360	97.8	148711	99.44	170633441	99.9			0.47	0.73	1.16	1.37
			90	277	152205	2782	98.2	151560	99.58	170656566	99.91			0.46	0.65	1.13	1.36
		GIAB	30	1135	151465	4568	97.05	148684	98.16	170242095	99.67			0.51	1.04	1.63	1.67
			60	752	152769	3277	97.89	150977	98.83	170242095	99.67			0.47	0.73	1.47	1.57
			90	617	153212	2834	98.17	151747	99.04	170242095	99.67			0.46	0.65	1.41	1.54
	Hi-C	GIAB	30	9657	87929	68134	56.342	60549	68.8612	170244470	99.7			5.43	24.08	3.43	3.39
			60	3663	108869	47194	69.7596	100234	92.0684	170244470	99.7			2.19	15.05	1.58	1.74
			90	2496	115412	40651	73.9522	109597	94.9615	170244470	99.7			1.36	12.74	1.41	1.59
			531	1054	127806	28257	81.8939	125235	97.9884	170244977	99.7			/	/	1.28	1.49
7	Pore-C	Pore-C model	30	813	117746	5327	95.64	115705	98.27	159299306	99.97	159345973	0.2	1.35	2.51	0.62	0.4
			60	489	124187	3540	97.22	122776	98.86	159207756	99.91			1.01	2.16	0.44	0.28
			90	412	126984	2941	97.73	125742	99.02	159207756	99.91			0.8	2.06	0.39	0.24
		GIAB	30	1055	123009	4060	96.79	120414	97.89	159176842	99.89			1.35	2.51	0.81	0.55
			60	742	124198	2885	97.72	122422	98.57	159176842	99.89			1.01	2.16	0.66	0.44
			90	630	124623	2464	98.06	123111	98.79	159176842	99.89			0.8	2.06	0.56	0.36
	Hi-C	GIAB	30	7762	72223	54870	56.8269	50309	69.6579	159181647	99.9			5.61	23.95	1.99	1.64
			60	2881	89211	37882	70.1935	82471	92.4449	159181647	99.9			2.28	15.62	0.74	0.52
			90	2014	94553	32540	74.3967	89862	95.0388	159266603	100			1.38	13.33	0.58	0.38
			531	835	104508	22585	82.2295	102496	98.0748	159266603	100			/	/	0.42	0.27
8	Pore-C	Pore-C model	30	588	112710	4467	96.17	111257	98.71	144955276	99.87	145138636	0.3	0.45	1.4	0.45	0.28
			60	346	119324	2931	97.6	118466	99.28	144959628	99.88			0.36	0.91	0.24	0.16
			90	282	121917	2586	97.92	121252	99.45	144959628	99.88			0.33	0.75	0.2	0.12
		GIAB	30	886	107042	3738	96.6	104946	98.04	142075267	97.89			0.45	1.4	0.58	0.37
			60	659	108008	2785	97.47	106433	98.54	142075267	97.89			0.36	0.91	0.4	0.26
			90	583	108339	2459	97.77	106962	98.73	142075267	97.89			0.33	0.75	0.35	0.21
	Hi-C	GIAB	30	7641	61198	49613	55.2274	39619	64.739	141282658	97.3			5.17	24.41	2.48	1.81
			60	2817	77109	33702	69.5861	70459	91.3758	141283223	97.3			2.09	14.86	0.63	0.41
			90	1871	81952	28859	73.9566	77592	94.6798	141283223	97.3			1.23	12.47	0.4	0.25
			531	744	91249	19562	82.3465	89452	98.0307	142110576	97.9			/	/	0.23	0.15
9	Pore-C	Pore-C model	30	803	96047	4020	95.95	93527	97.38	138305609	99.94	138394717	12	13.33	14.29	0.31	0.19
			60	543	103535	2749	97.4	101800	98.32	138314539	99.94			13.2	13.83	0.18	0.11
			90	415	106787	2310	97.87	105321	98.63	138315048	99.94			13.11	13.69	0.11	0.07
		GIAB	30	726	94780	2916	97	93000	98.12	137919613	99.66			13.33	14.29	0.48	0.3
			60	511	95609	2096	97.85	94391	98.73	137919613	99.66			13.2	13.83	0.32	0.2
			90	431	95919	1787	98.16	94907	98.94	137919613	99.66			13.11	13.69	0.23	0.14
	Hi-C	GIAB	30	6318	56780	40933	58.109	39087	68.8394	137919613	99.7			16.25	32.22	1.56	1.15
			60	2427	69651	28062	71.2812	63854	91.6771	137919613	99.7			13.52	25.1	0.4	0.27
			90	1666	73773	23940	75.4997	69852	94.685	137919613	99.7			12.83	23.04	0.22	0.16
			531	636	81337	16376	83.2407	79738	98.0341	137919613	99.7			/	/	0.11	0.06
10	Pore-C	Pore-C model	30	570	106444	4145	96.23	104944	98.59	133771376	99.98	133797422	0.4	1.36	2.2	0.81	0.64
			60	333	113167	2799	97.58	111929	98.91	133772946	99.98			1.18	1.86	0.65	0.48
			90	258	115235	2308	98.03	114357	99.24	133775008	99.98			1.08	1.74	0.63	0.48
		GIAB	30	873	110859	3319	97.08	108702	98.05	133533241	99.8			1.36	2.2	1.08	0.8
			60	616	111720	2464	97.84	110224	98.66	133533241	99.8			1.18	1.86	0.88	0.64
			90	529	112060	2121	98.14	110757	98.84	133533241	99.8			1.08	1.74	0.79	0.59
	Hi-C	GIAB	30	6467	66952	47237	58.6326	49267	73.5856	133532723	99.8			5.15	21.34	2.11	1.77
			60	2357	81394	32795	71.2801	75754	93.0707	133532723	99.8			2.45	14.09	0.97	0.73
			90	1668	85926	28263	75.2489	81948	95.3704	133532723	99.8			1.72	11.98	0.78	0.6
			531	667	94220	19969	82.5123	92549	98.2265	133532723	99.8			/	/	0.66	0.51
11	Pore-C	Pore-C model	30	579	105425	4348	96.02	104055	98.7	135009324	99.94	135086622	0.4	0.46	1.7	0.39	0.26
			60	311	111720	2844	97.51	111017	99.37	135013252	99.95			0.43	0.84	0.19	0.13
			90	250	113532	2414	97.92	112979	99.51	135011027	99.94			0.43	0.6	0.13	0.09
		GIAB	30	858	106182	3592	96.71	104081	98.02	134876795	99.84			0.46	1.7	0.49	0.32
			60	593	107116	2660	97.56	105672	98.65	134876795	99.84			0.43	0.84	0.28	0.18
			90	523	107466	2323	97.88	106211	98.83	134876795	99.84			0.43	0.6	0.25	0.17
	Hi-C	GIAB	30	6166	63956	45837	58.2514	47192	73.7882	134884426	99.9			4.39	21.31	1.81	1.33
			60	2465	78242	31551	71.2632	72420	92.559	134884426	99.9			1.78	13.29	0.54	0.34
			90	1791	82624	27169	75.2543	78403	94.8913	134884426	99.9			1.12	11.08	0.29	0.17
			531	701	90854	18939	82.7503	89033	97.9957	134884426	99.9			/	/	0.11	0.07
12	Pore-C	Pore-C model	30	572	95580	4188	95.79	94162	98.52	133253332	99.98	133275309	0.1	1.29	2.2	0.38	0.23
			60	291	100711	2823	97.27	99837	99.13	133253893	99.98			0.99	2	0.21	0.14
			90	259	102566	2403	97.71	101652	99.11	133253603	99.98			0.8	1.94	0.18	0.11
		GIAB	30	900	97896	3596	96.42	95690	97.75	129852044	97.43			1.29	2.2	0.56	0.34
			60	657	98835	2677	97.35	97245	98.39	129852044	97.43			0.99	2	0.36	0.22
			90	577	99249	2268	97.76	97868	98.61	130837127	98.17			0.8	1.94	0.29	0.18
	Hi-C	GIAB	30	6367	56842	44685	55.9871	38939	68.5039	129738487	97.3			4.97	22.27	2.05	1.58
			60	2310	70361	31166	69.3027	64924	92.2727	129738487	97.3			1.91	14.48	0.49	0.3
			90	1530	74767	26760	73.6425	71203	95.2332	129738487	97.3			1.11	12.2	0.31	0.19
			531	620	82529	18998	81.2877	80997	98.1437	130841419	98.2			/	/	0.1	0.07
13	Pore-C	Pore-C model	30	362	78956	2940	96.4	77975	98.76	98293634	85.95	114364328	14.3	14.44	15.22	0.34	0.25
			60	211	83295	1910	97.76	82763	99.36	98290396	85.94			14.41	14.73	0.13	0.08
			90	152	84299	1619	98.12	83884	99.51	98292858	85.95			14.4	14.61	0.11	0.09
		GIAB	30	572	80675	2550	96.92	79298	98.29	94737067	82.84			14.44	15.22	0.46	0.3
			60	382	81348	1886	97.73	80452	98.9	94737067	82.84			14.41	14.73	0.29	0.18
			90	326	81605	1631	98.04	80843	99.07	94737067	82.84			14.4	14.61	0.21	0.13
	Hi-C	GIAB	30	6049	44515	38725	53.4779	26784	60.1685	94727762	82.8			19.52	38.56	2.07	1.66
			60	2361	56890	26350	68.3445	51219	90.0316	94727762	82.8			16.34	28.62	0.7	0.5
			90	1573	60883	22357	73.1415	57223	93.9885	94735700	82.8			15.43	26.4	0.35	0.23
			531	627	68452	14788	82.2345	66917	97.7576	94737067	82.8			/	/	0.12	0.08
14	Pore-C	Pore-C model	30	354	66433	2701	96.07	65566	98.69	90859394	84.88	107043718	17.3	17.57	17.83	0.36	0.24
			60	184	69781	1763	97.53	69357	99.39	90859874	84.88			17.53	17.66	0.18	0.11
			90	138	71038	1475	97.97	70716	99.55	90859710	84.88			17.5	17.64	0.11	0.06
		GIAB	30	538	72778	2407	96.78	71467	98.2	87045037	81.32			17.57	17.83	0.52	0.36
			60	389	73398	1792	97.61	72474	98.74	87045037	81.32			17.53	17.66	0.31	0.19
			90	332	73618	1573	97.9	72845	98.95	87045037	81.32			17.5	17.64	0.25	0.15
	Hi-C	GIAB	30	4734	42373	32825	56.3486	29203	68.9189	87016624	81.3			20.99	35.05	1.75	1.23
			60	1800	52366	22832	69.6375	48115	91.8821	87043740	81.3			18.7	28.35	0.68	0.43
			90	1230	55616	19582	73.9594	52756	94.8576	87044141	81.3			18.09	26.58	0.36	0.22
			531	498	61634	13564	81.9623	60410	98.0141	87044141	81.3			/	/	0.13	0.09
15	Pore-C	Pore-C model	30	488	57742	2921	95.15	56391	97.66	84961050	83.3	101991189	17	18.1	20.12	0.33	0.22
			60	326	61983	2108	96.69	60935	98.31	84969839	83.31			17.73	19.35	0.14	0.1
			90	286	63938	1770	97.29	62973	98.49	84968890	83.31			17.58	19.04	0.09	0.06
		GIAB	30	521	58635	2134	96.47	57383	97.86	78383065	76.85			18.1	20.12	0.51	0.35
			60	364	59132	1640	97.29	58265	98.53	78383065	76.85			17.73	19.35	0.26	0.17
			90	309	59319	1448	97.59	58584	98.76	78383065	76.85			17.58	19.04	0.22	0.14
	Hi-C	GIAB	30	3426	36170	24612	59.5077	26874	74.2991	78367499	76.8			20.64	33.93	2.59	2.21
			60	1308	43673	17109	71.8519	40562	92.8766	78382248	76.9			18.26	28.47	0.79	0.55
			90	862	46072	14710	75.7988	44047	95.6047	78382248	76.9			17.7	26.63	0.23	0.26
			531	302	50356	10426	82.8469	49601	98.5007	78382248	76.9			/	/	0.13	0.09
16	Pore-C	Pore-C model	30	582	70679	2989	95.92	68997	97.62	90216349	99.86	90338345	9.4	10.18	11.84	1.13	0.73
			60	374	75171	2089	97.28	74076	98.54	90216349	99.86			9.95	11.16	0.91	0.62
			90	311	76532	1667	97.86	75617	98.8	90216349	99.86			9.82	10.94	0.87	0.6
		GIAB	30	317	41284	1220	97.11	40513	98.13	84736667	93.8			10.18	11.84	1.33	0.9
			60	229	41556	948	97.75	41014	98.7	84736667	93.8			9.95	11.16	1.22	0.79
			90	206	41684	824	98.05	41186	98.81	84736667	93.8			9.82	10.94	1.13	0.76
	Hi-C	GIAB	30	2024	27229	15282	64.0517	21987	80.7485	43465792	48.1			12.52	25.55	2.15	1.52
			60	831	31785	10726	74.7689	29837	93.8713	64534448	71.4			10.61	19.97	1.36	0.95
			90	605	33183	9328	78.0574	31754	95.6936	64534448	71.4			10.13	18.21	1.2	0.83
			531	229	35881	6630	84.404	35290	98.3529	65541162	72.6			/	/	1.01	0.68
17	Pore-C	Pore-C model	30	474	56235	2919	95.04	55037	97.87	83184723	99.91	83257441	0.4	4.53	5.61	1.27	0.93
			60	286	59624	2012	96.73	58927	98.83	83186097	99.91			4.45	4.98	1.05	0.79
			90	237	60958	1740	97.22	60369	99.03	83186581	99.91			4.42	4.79	1.06	0.78
		GIAB	30	546	52765	2093	96.16	51422	97.45	81180941	97.51			4.53	5.61	1.79	1.34
			60	394	53247	1616	97.04	52305	98.23	81180941	97.51			4.45	4.98	1.62	1.17
			90	346	53484	1379	97.47	52635	98.41	81180941	97.51			4.42	4.79	1.55	1.13
	Hi-C	GIAB	30	2244	34631	20240	63.1135	28774	83.0874	81180344	97.5			4.17	17.11	2.83	2.07
			60	904	39945	14925	72.7993	37776	94.57	81218864	97.6			2.22	12.01	1.82	1.31
			90	636	41616	13254	75.8447	40115	96.3932	81218864	97.6			1.65	10.09	1.66	1.17
			531	229	44801	10070	81.6479	44241	98.75	81218864	97.6			/	/	1.42	1.04
18	Pore-C	Pore-C model	30	297	60137	2276	96.34	59232	98.5	80250945	99.85	80373285	0.4	3.92	6.7	0.32	0.22
			60	201	64185	1577	97.6	63423	98.81	80251090	99.85			3.1	6.15	0.14	0.08
			90	189	65959	1398	97.91	65268	98.95	80251090	99.85			2.66	5.84	0.14	0.09
		GIAB	30	365	49898	1582	96.91	49026	98.25	80012309	99.55			3.92	6.7	0.46	0.26
			60	261	50311	1173	97.72	49707	98.8	80013841	99.55			3.1	6.15	0.29	0.16
			90	215	50449	1034	97.98	49956	99.02	80013841	99.55			2.66	5.84	0.27	0.16
	Hi-C	GIAB	30	3643	27472	24015	53.3572	17083	62.1833	79930286	99.4			7.29	28.98	2.42	1.87
			60	1459	35204	16283	68.3745	31749	90.1858	79930286	99.4			2.88	19.7	0.72	0.51
			90	966	37681	13806	73.1855	35436	94.0421	79930286	99.4			1.71	16.76	0.38	0.25
			531	413	42280	9207	82.1178	41245	97.552	80012880	99.6			/	/	0.1	0.07
19	Pore-C	Pore-C model	30	280	50102	1943	96.25	49471	98.74	58534298	99.86	58617616	4.9	4.89	5.19	0.57	0.42
			60	112	52477	1218	97.73	52225	99.52	58543562	99.87			4.89	4.95	0.23	0.15
			90	93	52711	1007	98.12	52502	99.6	58534774	99.86			4.88	4.92	0.17	0.11
		GIAB	30	464	46213	1560	96.71	45052	97.49	58308226	99.47			4.89	5.19	0.8	0.59
			60	319	46645	1132	97.62	45864	98.33	58311462	99.48			4.89	4.95	0.53	0.34
			90	266	46812	965	97.97	46158	98.6	58311462	99.48			4.88	4.92	0.43	0.27
	Hi-C	GIAB	30	1365	32465	15318	67.9426	29005	89.3424	58318728	99.5			6.9	15.52	1.79	1.32
			60	630	35668	12115	74.6458	34164	95.7833	58318728	99.5			5.8	12.37	0.86	0.64
			90	462	36703	11080	76.8118	35586	96.9567	58318728	99.5			5.51	11.2	0.56	0.39
			531	206	38858	8925	81.3218	38357	98.7107	58318728	99.5			/	/	0.28	0.2
20	Pore-C	Pore-C model	30	302	57816	1986	96.66	56969	98.54	64259088	99.71	64444167	0.8	1.53	3.54	0.43	0.4
			60	129	60347	1296	97.89	59918	99.29	64267032	99.73			1.3	2.77	0.22	0.24
			90	114	58937	1091	98.18	58522	99.3	64265865	99.72			1.18	2.48	0.17	0.21
		GIAB	30	422	48417	1608	96.76	47376	97.85	64209056	99.64			1.53	3.54	0.55	0.43
			60	290	48854	1174	97.64	48152	98.56	64209056	99.64			1.3	2.77	0.37	0.32
			90	250	49023	1007	97.98	48414	98.76	64209056	99.64			1.18	2.48	0.31	0.28
	Hi-C	GIAB	30	2540	30553	19483	61.062	23841	78.0316	64207741	99.6			4.41	19.6	1.66	1.24
			60	977	36430	13606	72.8076	34134	93.6975	64209056	99.6			2.1	13.4	0.7	0.53
			90	692	38209	11827	76.363	36556	95.6738	64209056	99.6			1.52	11.1	0.44	0.38
			531	286	41502	8534	82.9443	40800	98.3085	64213203	99.6			/	/	0.25	0.26
21	Pore-C	Pore-C model	30	256	40701	1079	97.41	39680	97.49	41682362	89.24	46709983	18.6	18.66	20.04	0.26	0.19
			60	150	44087	816	98.17	43474	98.61	41688624	89.25			18.6	19.1	0.12	0.07
			90	120	44967	677	98.51	44522	99.01	41688595	89.25			18.58	18.94	0.09	0.07
		GIAB	30	196	30460	857	97.25	29993	98.47	32603128	69.8			18.66	20.04	0.52	0.35
			60	141	30664	655	97.9	30341	98.95	32603128	69.8			18.6	19.1	0.23	0.15
			90	132	30751	568	98.18	30446	99.01	32603128	69.8			18.58	18.94	0.14	0.09
	Hi-C	GIAB	30	1921	18660	12661	59.5766	13030	69.8285	32603128	69.8			22.68	38.83	1.68	1.56
			60	814	22486	8835	71.7921	20488	91.1145	32603128	69.8			20.19	31.1	0.59	0.39
			90	566	23684	7637	75.617	22325	94.2619	32603128	69.8			19.5	29.1	0.3	0.21
			531	213	26093	5228	83.3083	25543	97.8922	33675974	72.1			/	/	0.15	0.11
22	Pore-C	De novo	30	268	40799	1175	97.18	39653	97.19	40292397	79.29	50818468	27.1	27.18	27.93	1.35	0.93
			60	148	43831	723	98.38	43297	98.78	40295230	79.29			27.15	27.38	1.35	0.95
			90	99	44426	572	98.72	44108	99.28	40292594	79.29			27.15	27.27	1.25	0.88
		Re-phasing	30	239	28072	753	97.37	27479	97.89	31023214	61.05			27.18	27.93	1.9	1.38
			60	155	28293	531	98.14	27906	98.63	31023214	61.05			27.15	27.38	1.72	1.23
			90	124	28349	476	98.34	28048	98.94	31023214	61.05			27.15	27.27	1.6	1.16
	Hi-C	Re-phasing	30	669	20179	8650	69.9955	18591	92.1304	31008674	61			28.69	36.91	2.57	1.76
			60	355	22002	6827	76.319	21171	96.2231	31013440	61			27.78	33.96	1.72	1.27
			90	296	22602	6227	78.4002	21893	96.8631	31013440	61			27.55	32.78	1.62	1.21
			531	103	23887	4942	82.8575	23643	98.9785	31013440	61			/	/	1.54	1.15
X	Pore-C	Pore-C model	30	1123	67635	6016	91.8	64637	95.57	156016633	99.98	156040895	0.7	1.21	3.1	0.69	0.53
			60	684	72797	4211	94.51	70796	97.25	156016621	99.98			0.99	2.41	0.29	0.22
			90	580	75559	3712	95.3	73761	97.62	156016654	99.98			0.9	2.06	0.23	0.17
		GIAB	30	1195	58122	3957	93.6	55120	94.84	148952276	95.46			1.21	3.1	0.89	0.69
			60	850	59059	3020	95.11	56981	96.48	148952276	95.46			0.99	2.41	0.63	0.47
			90	744	59386	2691	95.64	57598	96.99	148952276	95.46			0.9	2.06	0.48	0.33
	Hi-C	GIAB	30	6406	23589	38506	37.9886	1031	4.37068	135046017	86.5			5.7	26.36	3.4	27.6
			60	3549	33577	28518	54.0736	23837	70.992	142264582	91.2			2.59	15.57	2.42	1.96
			90	2094	37868	24227	60.984	32711	86.3816	142264582	91.2			1.72	13.07	0.65	0.47
			531	609	46527	15568	74.9287	45109	96.9523	142274382	91.2			/	/	0.2	0.13

## Sheet: Table S5
Supplementary Table 5. Efficiency of hapltoype imputation on HG001 datasets. H1 and H2 denote the maternal and paternal haplotypes, respectively. #The Hi-C dataset were acquired from the study of Rao et al. (2014). The 878× Hi-C dataset includes the 531× MboI dataset and other datasets using different restriction enzymes (Rao et al., 2014).
		Hi-C							Pore-C
Overview		Data size (Gbp)	2632.5				1593.3		Data size (Gbp)	567
		Sequencing depth	878×				531×		Sequencing depth	190×
		Read count (M)	13162.4 × 2				7958.2 × 2		Read count (M)	119
Restriction enzyme			Including MboI (531×) and other enzymes#				MboI			DpnII (isoschizomer of MboI)
Fragments (M)		Total			8174.1 × 2		7433.3 × 2			595.6
		Tagged with het-SNP	Both-end tagged reads		11.2 × 2		12.6 × 2		Tagged with het-SNP (All/H1/H2)	134.2/67.2/67
			Single-end tagged reads		468.4 × 2		401.7 × 2
			Zero-end tagged reads		7694.5 × 2		7019.0 × 2
			H1 reads		4.7 × 2		5.5 × 2		Rescue with distance rule (All/H1/H2)	330.1/165.3/164.8
			H2 reads		4.7 × 2		5.5 × 2
			H-trans reads		1.8 × 2		1.6 × 2
		Mate-rescue	Both-end tagged reads		479.6 × 2		414.3 × 2		Rescue with bridging rule (All/H1/H2)	337.8/169.1/168.7
			Single-end tagged reads		0		0
			Zero-end tagged reads		7694.5 × 2		7019.0 × 2
			H1 reads		238.1 × 2		206.8 × 2		Rescue with dominant haplotype rule (All/H1/H2)	357.3/178.8/178.5
			H2 reads		239.7 × 2		205.9 × 2
			H-trans reads		1.8 × 2		1.6 × 2
Pairwise contacts (M)		Total	8174.1				7433.3		All	1421.1
		Tagged with het-SNP	Tagged		11.2		12.6		Tagged with het-SNP (All/H1/H2/H-trans)	87.1/42.5/42.4/2.2
			H1		4.7		5.5
			H2		4.7		5.5		Rescue with distance rule (All/H1/H2/H-trans)	888.6/441.8/439.9/7
			H-trans		1.8		1.6
		Tagged with Mate-rescue	Tagged		479.6		414.3		Rescue with bridging rule (All/H1/H2/H-trans)	939.6/466.8/465.5/7.3
			H1		238.1		206.8
			H2		239.7		205.9		Rescue with dominant haplotype rule (All/H1/H2/H-trans)	1033.5/513.2/512.9/7.3
			H-trans		1.8		1.6

## Sheet: Table S6
Supplementary Table 6. Coverage of NGS-difficult regions in Hi-C and Pore-C diploid contact matrices. The results based on 531× Hi-C data and 190× Pore-C data of HG001 are summarized in this table. The diffcult regions are provided with BED files downloaded from https://ftp-trace.ncbi.nlm.nih.gov/giab/ftp/release/genome-stratifications/v2.0/GRCh38/. Gaps denote regions covered by fewer than 10× h…
Region type		Total bases	N-masked bases (%)	Gaps with <1× coverage (length in bp / gap ratio %)				Gaps with <10× coverage (length in bp / gap ratio %)				Genomic regions (BED files)
				All aligned fragments		Haplotype-assigned fragments		All aligned fragments		Haplotype-assigned fragments
				Hi-C	Pore-C	Hi-C	Pore-C	Hi-C	Pore-C	Hi-C	Pore-C
GC content (%) (count / gap ratio %)	0-15	5303101	48/0.00	407670/7.69	75290/1.42	2640729/49.80	79647/1.50	1438826/27.13	88016/1.66	4657064/87.82	108212/2.04	GRCh38_gc15_slop50.bed.gz
	15-20	14314006	0/0.00	21973/0.15	158446/1.11	3962014/27.68	162909/1.14	569082/3.98	169495/1.18	10867306/75.92	182938/1.28	GRCh38_gc15to20_slop50.bed.gz
	20-25	117189860	51/0.00	71322/0.06	1071049/0.91	26547360/22.65	1087357/0.93	1838485/1.57	1123537/0.96	81454371/69.51	1206668/1.03	GRCh38_gc20to25_slop50.bed.gz
	25-30	394144353	103/0.00	171638/0.04	3415902/0.87	74374924/18.87	3469098/0.88	2322437/0.59	3583165/0.91	245985752/62.41	3826929/0.97	GRCh38_gc25to30_slop50.bed.gz
	70-75	11790706	0/0.00	36959/0.31	48177/0.41	4470869/37.92	51936/0.44	577819/4.90	56981/0.48	8552023/72.53	82838/0.70	GRCh38_gc70to75_slop50.bed.gz
	75-80	5248298	0/0.00	145229/2.77	5358/0.10	2980074/56.78	7371/0.14	1392723/26.54	10115/0.19	4540869/86.52	27058/0.52	GRCh38_gc75to80_slop50.bed.gz
	80-85	2596229	1/0.00	292487/11.27	1176/0.05	2019668/77.79	1820/0.07	1425048/54.89	3777/0.15	2462695/94.86	25170/0.97	GRCh38_gc80to85_slop50.bed.gz
	85-100	544746	51/0.01	165913/30.46	0/0.00	463288/85.05	269/0.05	406278/74.58	585/0.11	528723/97.06	2820/0.52	GRCh38_gc85_slop50.bed.gz
Simple Repeats (bp)	diTR 10-50	14126406	7/0.00	50022/0.35	121454/0.86	3266525/23.12	127332/0.90	374112/2.65	151142/1.07	9207107/65.18	189449/1.34	GRCh38_SimpleRepeat_diTR_11to50_slop5.bed.gz
	diTR 50-200	313064	0/0.00	40/0.01	1599/0.51	103448/33.04	1599/0.51	6326/2.02	4312/1.38	259524/82.90	8560/2.73	GRCh38_SimpleRepeat_diTR_51to200_slop5.bed.gz
	diTR >200	1117	0/0.00	308/27.57	0/0.00	1117/100.00	0/0.00	658/58.91	841/75.29	1117/100.00	910/81.47	GRCh38_SimpleRepeat_diTR_gt200_slop5.bed.gz
	triTR 15-50	3011899	6/0.00	19809/0.66	24937/0.83	504603/16.75	25333/0.84	68132/2.26	26554/0.88	1689509/56.10	29662/0.98	GRCh38_SimpleRepeat_triTR_15to50_slop5.bed.gz
	triTR 50-200	58070	5/0.01	202/0.35	1262/2.17	18394/31.68	1262/2.17	468/0.81	1344/2.31	47042/81.01	1617/2.78	GRCh38_SimpleRepeat_triTR_51to200_slop5.bed.gz
	triTR >200	1270	0/0.00	143/11.26	0/0.00	1187/93.46	0/0.00	341/26.85	0/0.00	1262/99.37	0/0.00	GRCh38_SimpleRepeat_triTR_gt200_slop5.bed.gz
	quadTR 20-50	4260126	2/0.00	1493/0.04	35387/0.83	643004/15.09	36615/0.86	20075/0.47	38691/0.91	1689509/39.66	43964/1.03	GRCh38_SimpleRepeat_quadTR_20to50_slop5.bed.gz
	quadTR 50-200	646435	0/0.00	6/0.00	10244/1.58	142878/22.10	10581/1.64	966/0.15	12036/1.86	47042/7.28	13670/2.11	GRCh38_SimpleRepeat_quadTR_51to200_slop5.bed.gz
	quadTR >200	2145	0/0.00	0/0.00	0/0.00	1861/86.76	0/0.00	247/11.52	382/17.81	2073/96.64	541/25.22	GRCh38_SimpleRepeat_quadTR_gt200_slop5.bed.gz
	homopolymer 4-6	789111519	89/0.00	800362/0.10	8342028/1.06	147487602/18.69	10228224/1.30	5557120/0.70	12099756/1.53	438409244/55.56	14614406/1.85	GRCh38_SimpleRepeat_homopolymer_4to6_slop5.bed.gz
	homopolymer 7-11	49788855	4/0.00	33691/0.07	431318/0.87	7997811/16.06	463078/0.93	317621/0.64	506611/1.02	27632276/55.50	589372/1.18	GRCh38_SimpleRepeat_homopolymer_7to11_slop5.bed.gz
	homopolymer >11	18344341	8/0.00	1897/0.01	112046/0.61	2145344/11.69	115470/0.63	22909/0.12	134250/0.73	11704467/63.80	167790/0.91	GRCh38_SimpleRepeat_homopolymer_gt11_slop5.bed.gz
Tandem Repeats (bp) (count/ratio)	0-50	38085246	65/0.00	117172/0.31	320244/0.84	7482443/19.65	330360/0.87	750302/1.97	361023/0.95	22857778/60.02	417161/1.10	GRCh38_AllTandemRepeats_lt51bp_slop5.bed.gz
	50-200	26604713	9/0.00	132805/0.50	343388/1.29	6340963/23.83	350139/1.32	829381/3.12	375137/1.41	17482194/65.71	417809/1.57	GRCh38_AllTandemRepeats_51to200bp_slop5.bed.gz
	200-10000	38076769	37563/0.10	592126/1.56	732958/1.92	15527464/40.78	828365/2.18	2456048/6.45	881865/2.32	27565437/72.39	1152745/3.03	GRCh38_AllTandemRepeats_201to10000bp_slop5.bed.gz
	>10000	71877742	11119262/15.47	11866151/16.51	20257361/28.18	67867069/94.42	27877198/38.78	15975861/22.23	34804985/48.42	70666913/98.32	42685927/59.39	GRCh38_AllTandemRepeats_gt10000bp_slop5.bed.gz
	>10kb	151530125	411/0.00	299368/0.20	13079567/8.63	94604541/62.43	13559668/8.95	1565076/1.03	14192007/9.37	128971380/85.11	16201228/10.69	GRCh38_segdups_gt10kb.bed.gz
	>10kb and >5 dups	2094143	0/0.00	1965/0.09	1398/0.07	2084124/99.52	9178/0.44	31227/1.49	11377/0.54	2094094/100.00	180482/8.62	GRCh38_gt5segdups_gt10kb_gt99percidentity.bed.gz
	nonunique_l100_m2_e1	248846792	11164200/4.49	12135421/4.88	31192117/12.53	193613591/77.80	39070277/15.70	17655976/7.10	46507382/18.69	227024839/91.23	56269656/22.61	GRCh38_nonunique_l100_m2_e1.bed.gz
	nonunique_l250_m0_e0	89246198	11164153/12.51	11592664/12.99	23428578/26.25	81539417/91.36	28494896/31.93	14054395/15.75	33136883/37.13	82161737/92.06	38960225/43.65	GRCh38_nonunique_l250_m0_e0.bed.gz

## Sheet: Table S7
Supplementary Table 7. QuASAR quality scores of diploid contact matrices of HG001 based on Hi-C and Pore-C. The original Pore-C (190×) diploid contact matrices were downsampled to make equal contact sized matrices compared to the Hi-C (878×) matrices from Rao et al. (2014). The QuASAR scores were compared with 10kb, 50kb, 100kb, and 500kb bin sizes, respectively.
Chromosome	Million contacts (maternal/paternal)		QuASAR quality score (maternal/paternal)
			10 kb		50 kb		100 kb		500 kb
	Hi-C	Pore-C	Hi-C	Pore-C	Hi-C	Pore-C	Hi-C	Pore-C	Hi-C	Pore-C
All	158.18/159.08	160.05/160.00	0.002407/0.002483	0.009043/0.008935	0.013839/0.013250	0.030588/0.029565	0.021758/0.020877	0.040148/0.039224	0.041605/0.041233	0.060103/0.059639
1	13.02/13.05	13.42/13.46	0.001682/0.001685	0.008994/0.009137	0.013045/0.012429	0.026298/0.026604	0.020499/0.019661	0.035262/0.035254	0.050389/0.049350	0.068523/0.067285
2	13.44/13.48	14.14/14.23	0.002265/0.002250	0.009031/0.009260	0.014788/0.015532	0.033216/0.034413	0.020979/0.021865	0.041808/0.043252	0.033559/0.034792	0.055435/0.055926
3	11.00/10.84	11.64/11.59	0.001639/0.001468	0.008816/0.008809	0.009408/0.009588	0.029175/0.029689	0.017337/0.017589	0.039291/0.040386	0.046978/0.047793	0.067527/0.068987
4	9.36/9.39	10.40/10.41	0.000658/0.000592	0.006918/0.006924	0.005726/0.005748	0.022244/0.022639	0.007861/0.007566	0.025164/0.025948	0.015472/0.015698	0.032446/0.033222
5	9.79/9.86	10.28/10.33	0.002284/0.002141	0.008705/0.008785	0.011690/0.010947	0.028798/0.028368	0.017699/0.017443	0.036446/0.037552	0.034034/0.034408	0.051589/0.054567
6	10.49/10.48	10.24/10.23	0.003211/0.003207	0.010102/0.010021	0.014508/0.014634	0.031754/0.031441	0.021167/0.021074	0.040518/0.040586	0.044230/0.044614	0.061178/0.060745
7	8.43/8.44	8.66/8.65	0.002788/0.002813	0.009294/0.009173	0.015138/0.015035	0.032502/0.033462	0.023513/0.023253	0.042541/0.043223	0.046980/0.047494	0.062456/0.063169
8	8.40/8.42	8.13/8.09	0.001884/0.002003	0.008309/0.008421	0.012565/0.012809	0.030187/0.029238	0.018650/0.019014	0.040266/0.038712	0.023998/0.024102	0.046937/0.046299
9	6.17/6.16	5.97/6.04	0.002333/0.002318	0.008858/0.008983	0.017216/0.016789	0.030187/0.029763	0.031476/0.029481	0.041509/0.039838	0.063125/0.065684	0.074347/0.077991
10	8.24/8.25	7.70/7.70	0.001486/0.001548	0.009364/0.009319	0.018807/0.018274	0.033758/0.032235	0.028962/0.028263	0.042720/0.041021	0.048377/0.047858	0.055950/0.053054
11	7.77/8.67	7.25/7.24	0.002222/0.002207	0.008101/0.008094	0.011385/0.012222	0.025854/0.025721	0.021527/0.022841	0.038392/0.038035	0.073904/0.075108	0.086780/0.088087
12	7.35/7.40	7.86/7.89	0.002694/0.002643	0.010802/0.010773	0.015734/0.015169	0.033101/0.032976	0.024632/0.024104	0.043445/0.042411	0.042904/0.042840	0.064568/0.062314
13	4.90/4.92	5.20/5.19	0.001659/0.001582	0.008519/0.008461	0.009281/0.008695	0.027657/0.026782	0.012683/0.012475	0.032870/0.032250	0.023614/0.022040	0.049405/0.042604
14	4.82/4.82	4.96/4.90	0.002622/0.002505	0.010430/0.010390	0.017236/0.014363	0.038254/0.035762	0.032407/0.027639	0.056174/0.054280	0.063770/0.053483	0.079411/0.075892
15	4.55/4.53	4.27/4.23	0.001614/0.001583	0.009963/0.009750	0.021055/0.020125	0.035749/0.033997	0.027572/0.026859	0.041038/0.039913	0.059114/0.058931	0.062382/0.060862
16	5.04/5.04	4.27/4.24	0.005758/0.005434	0.010216/0.010291	0.030466/0.029996	0.043996/0.041838	0.040796/0.041055	0.059492/0.056770	0.060352/0.059693	0.084976/0.077989
17	4.47/4.53	4.17/4.18	0.002019/0.002546	0.009948/0.010341	0.021483/0.021436	0.034603/0.033783	0.039484/0.039575	0.052655/0.050521	0.059030/0.057793	0.071097/0.067058
18	4.12/4.14	4.04/4.03	0.001792/0.001746	0.008042/0.007999	0.010234/0.010786	0.024821/0.025841	0.016065/0.016285	0.031820/0.034430	0.032418/0.033039	0.043708/0.046592
19	3.86/3.83	3.74/3.76	0.003227/0.002897	0.013486/0.012894	0.027606/0.027483	0.042411/0.041037	0.046429/0.046737	0.057395/0.056486	0.088906/0.092017	0.086274/0.089766
20	3.77/3.76	3.30/3.30	0.002340/0.002708	0.010448/0.010535	0.018424/0.018815	0.032532/0.032712	0.035297/0.034844	0.048508/0.048261	0.068422/0.067760	0.074092/0.072630
21	1.91/1.87	1.68/1.61	0.004007/0.003622	0.009852/0.009333	0.020939/0.017952	0.040352/0.032837	0.036201/0.030893	0.054096/0.043525	0.083510/0.082407	0.088198/0.080974
22	2.48/2.51	1.87/1.89	0.006829/0.006649	0.012432/0.011524	0.034996/0.030827	0.042583/0.038512	0.053207/0.049471	0.058860/0.057228	0.070808/0.069046	0.081722/0.085535
X	4.78/4.68	6.86/6.81	0.000116/-0.000580	0.005996/0.002546	0.001112/-0.003654	0.024156/0.011661	0.003248/-0.002616	0.030758/0.018238	0.010413/0.005828	0.043024/0.035618

## Sheet: Table S8
Supplementary Table 8. Overlap between unphased Hi-C TADs and diploid Hi-C and Pore-C (Dip3D) TADs. Unphased Hi-C TADs and Hi-C haplotype TADs were called using the unphased combined DpnII , maternal, and paternal contact matrices from Rao et al. 2014 (GSE63525). Pore-C haplotype TADs were called using haplotype-resolved pairwise contact matrices from 190× Pore-C data. TADs were called by Juicer …
Hi-C unphased TADs				Hi-C maternal TADs			Hi-C paternal TADs			Pore-C maternal TADs			Pore-C paternal TADs
chrom	start	end	rID	chrom_HiC_ma	start_HiC_ma	end_HiC_ma	chrom_HiC_pa	start_HiC_pa	end_HiC_pa	chrom_PoreC_ma	start_PoreC_ma	end_PoreC_ma	chrom_PoreC_pa	start_PoreC_pa	end_PoreC_pa
chr1	2550000	3350000	677
chr1	3950000	5500000	683							chr1	4000000	5350000
chr1	6700000	7800000	738	chr1	6750000	7950000	chr1	6750000	7950000	chr1	6700000	7950000	chr1	6700000	7800000
chr1	8000000	8900000	698
chr1	9750000	10500000	804	chr1	9800000	10450000				chr1	9750000	10450000	chr1	9750000	10450000
chr1	11050000	11900000	720	chr1	11050000	11850000	chr1	11050000	11850000				chr1	11100000	11850000
chr1	14350000	15400000	693	chr1	14400000	15350000	chr1	14350000	15400000	chr1	14300000	15400000	chr1	14300000	15400000
chr1	15850000	16750000	774							chr1	15850000	16800000	chr1	15800000	16700000
chr1	17800000	19150000	783	chr1	17900000	19100000	chr1	17800000	19100000	chr1	17750000	19150000	chr1	17800000	19150000
chr1	20150000	20850000	754							chr1	20150000	20800000
chr1	20900000	23550000	724
chr1	20950000	21700000	747
chr1	22400000	23250000	760										chr1	22400000	23250000
chr1	24300000	26300000	716
chr1	25600000	26350000	772
chr1	27350000	28050000	811							chr1	27350000	28050000
chr1	29600000	30250000	682
chr1	31450000	33500000	700							chr1	31500000	33500000
chr1	34000000	35200000	705	chr1	33950000	35150000	chr1	34000000	35150000	chr1	34000000	35200000	chr1	34000000	35150000
chr1	35300000	36250000	801
chr1	36950000	37900000	673							chr1	36950000	37900000	chr1	36950000	37900000
chr1	38450000	39300000	688	chr1	38450000	39250000	chr1	38450000	39250000	chr1	38450000	39300000	chr1	38450000	39250000
chr1	39450000	40200000	766	chr1	39450000	40200000	chr1	39450000	40250000	chr1	39450000	40150000
chr1	41450000	45100000	695
chr1	41900000	42650000	735	chr1	41900000	42750000	chr1	41950000	42750000				chr1	41900000	42650000
chr1	43650000	44550000	790	chr1	43700000	44500000
chr1	45150000	45950000	733							chr1	45200000	46000000	chr1	45200000	46000000
chr1	45150000	46750000	704							chr1	45150000	46700000	chr1	45150000	46700000
chr1	46050000	46750000	719
chr1	46900000	48300000	757
chr1	49350000	50750000	736	chr1	49400000	50800000	chr1	49350000	50800000				chr1	49300000	50750000
chr1	52350000	55350000	670
chr1	52500000	53450000	796				chr1	52550000	53400000	chr1	52500000	53600000
chr1	54300000	55450000	727	chr1	54300000	55300000				chr1	54300000	55350000	chr1	54300000	55300000
chr1	55700000	57150000	701				chr1	55750000	57150000	chr1	55750000	57150000	chr1	55650000	57150000
chr1	57250000	58000000	765
chr1	57300000	58800000	717										chr1	57300000	58750000
chr1	59150000	60250000	678							chr1	59150000	60250000	chr1	59150000	60250000
chr1	60400000	61250000	743							chr1	60450000	61200000
chr1	60400000	62100000	725							chr1	60400000	62100000	chr1	60400000	62100000
chr1	61300000	62050000	805										chr1	61350000	62100000
chr1	64000000	64700000	712							chr1	64050000	64700000	chr1	64000000	64700000
chr1	66250000	67150000	721										chr1	66300000	67150000
chr1	67200000	67950000	785
chr1	68950000	70250000	731	chr1	69000000	70200000				chr1	69000000	70200000	chr1	68950000	70200000
chr1	71550000	72550000	809
chr1	74250000	75150000	808										chr1	74200000	75150000
chr1	76300000	78550000	694
chr1	76450000	77550000	799
chr1	79850000	80600000	795										chr1	79850000	80600000
chr1	80650000	81600000	781							chr1	80700000	81600000	chr1	80650000	81650000
chr1	81700000	84300000	710							chr1	81800000	84300000	chr1	81800000	84300000
chr1	83450000	84300000	769				chr1	83350000	84300000	chr1	83300000	84300000
chr1	84350000	85350000	763	chr1	84450000	85450000				chr1	84350000	85350000
chr1	85750000	86750000	794							chr1	85750000	86750000	chr1	85750000	86700000
chr1	87550000	89050000	750							chr1	87550000	89050000	chr1	87550000	89050000
chr1	89350000	90450000	742							chr1	89350000	90400000	chr1	89300000	90400000
chr1	90450000	93250000	714
chr1	90500000	91600000	762
chr1	91800000	92400000	706
chr1	93650000	94400000	691
chr1	94400000	95500000	759							chr1	94400000	95500000	chr1	94400000	95500000
chr1	95750000	97100000	784							chr1	95750000	97100000	chr1	95750000	97100000
chr1	97400000	98500000	718							chr1	97450000	98500000	chr1	97450000	98500000
chr1	99200000	100150000	768
chr1	100200000	101350000	708							chr1	100200000	101300000	chr1	100200000	101300000
chr1	100200000	101900000	715							chr1	100200000	101900000	chr1	100200000	101900000
chr1	101350000	101950000	684
chr1	102000000	102900000	745							chr1	102000000	102900000	chr1	102000000	102900000
chr1	104300000	106350000	676							chr1	104300000	106400000	chr1	104300000	106350000
chr1	105050000	106350000	749										chr1	105050000	106350000
chr1	106450000	107700000	798							chr1	106500000	107700000
chr1	111400000	112300000	800							chr1	111350000	112300000
chr1	115500000	116300000	791
chr1	117650000	118450000	723										chr1	117650000	118400000
chr1	118550000	120100000	686
chr1	150050000	151200000	671
chr1	151250000	151950000	764				chr1	151200000	151950000	chr1	151250000	151950000
chr1	152000000	153400000	702				chr1	152000000	153250000	chr1	152000000	153400000	chr1	152000000	153250000
chr1	152550000	153250000	726	chr1	152450000	153250000				chr1	152550000	153250000
chr1	153500000	154200000	756										chr1	153500000	154200000
chr1	154300000	155050000	709				chr1	154300000	155050000	chr1	154300000	155100000	chr1	154300000	155100000
chr1	155150000	156250000	740				chr1	155100000	156250000	chr1	155150000	156250000	chr1	155150000	156350000
chr1	157150000	159950000	680
chr1	158100000	159050000	737	chr1	158100000	159000000	chr1	158100000	159000000				chr1	158100000	159050000
chr1	159100000	159950000	732										chr1	159100000	159950000
chr1	160100000	161350000	748							chr1	160100000	161350000
chr1	161750000	162750000	770
chr1	161850000	163250000	707
chr1	163350000	165000000	728	chr1	163350000	165000000	chr1	163350000	165000000	chr1	163350000	165000000	chr1	163350000	165000000
chr1	165300000	166750000	734	chr1	165500000	166800000	chr1	165300000	166750000	chr1	165300000	166750000	chr1	165250000	166750000
chr1	166800000	167650000	792										chr1	166800000	167600000
chr1	168250000	169350000	690	chr1	168300000	169300000				chr1	168250000	169350000	chr1	168200000	169450000
chr1	169850000	170850000	730	chr1	169900000	170750000				chr1	169850000	170900000	chr1	169850000	170850000
chr1	171900000	174150000	687
chr1	172550000	174950000	703	chr1	172600000	174850000	chr1	172550000	174950000	chr1	172550000	174950000	chr1	172500000	174950000
chr1	172600000	174150000	729							chr1	172600000	174100000	chr1	172600000	174150000
chr1	175200000	176400000	767
chr1	175300000	178200000	674
chr1	177050000	177950000	775
chr1	178250000	178950000	779
chr1	178250000	179550000	758							chr1	178400000	179600000	chr1	178300000	179550000
chr1	180450000	182750000	739							chr1	180450000	182750000	chr1	180450000	182750000
chr1	181150000	182000000	782	chr1	181150000	181950000	chr1	181150000	181950000				chr1	181150000	182000000
chr1	186350000	186950000	696							chr1	186350000	186950000	chr1	186350000	186950000
chr1	187000000	188700000	778							chr1	187000000	188800000	chr1	186950000	188600000
chr1	187650000	188550000	802
chr1	189350000	190400000	803
chr1	190550000	192350000	773										chr1	190550000	192350000
chr1	194350000	195750000	807							chr1	194450000	195750000
chr1	196700000	197300000	761
chr1	198700000	199450000	692							chr1	198700000	199500000	chr1	198700000	199500000
chr1	199550000	200450000	722	chr1	199650000	200450000				chr1	199600000	200450000	chr1	199600000	200450000
chr1	202100000	202950000	806							chr1	202100000	202950000	chr1	202100000	202900000
chr1	203000000	203700000	812							chr1	203000000	203700000	chr1	203000000	203700000
chr1	207000000	207950000	681
chr1	208200000	209700000	780							chr1	208300000	209700000
chr1	210250000	211600000	679							chr1	210250000	211400000	chr1	210250000	211400000
chr1	211700000	212600000	741							chr1	211700000	212600000	chr1	211700000	212600000
chr1	211700000	213200000	685							chr1	211750000	213200000	chr1	211700000	213200000
chr1	213400000	214300000	699	chr1	213450000	214300000	chr1	213400000	214300000	chr1	213350000	214300000	chr1	213400000	214300000
chr1	214850000	215750000	771							chr1	214800000	215750000	chr1	214800000	215750000
chr1	216900000	218300000	789							chr1	216850000	218200000	chr1	216800000	218150000
chr1	218400000	219950000	753				chr1	218550000	219950000	chr1	218400000	219950000	chr1	218400000	219950000
chr1	220250000	220900000	744										chr1	220300000	220900000
chr1	220950000	222600000	689							chr1	220950000	222600000	chr1	220950000	222600000
chr1	221600000	222400000	697	chr1	221650000	222350000				chr1	221650000	222350000	chr1	221600000	222350000
chr1	223900000	224600000	788
chr1	227600000	228700000	786
chr1	228750000	229600000	711							chr1	228750000	229600000	chr1	228750000	229550000
chr1	229700000	230500000	675							chr1	229700000	230500000	chr1	229750000	230500000
chr1	231850000	233350000	751	chr1	231850000	233350000	chr1	231850000	233300000	chr1	231850000	233350000	chr1	231900000	233350000
chr1	231950000	232650000	787
chr1	232700000	233350000	755
chr1	233400000	234400000	672	chr1	233450000	234400000	chr1	233450000	234300000
chr1	235400000	236150000	793
chr1	237050000	237750000	713							chr1	237050000	237750000	chr1	237050000	237800000
chr1	237850000	240100000	746							chr1	237800000	240150000	chr1	237850000	240150000
chr1	239450000	240050000	797
chr1	241000000	241650000	810							chr1	241000000	241600000
chr1	243500000	244450000	776							chr1	243500000	244550000	chr1	243500000	244450000
chr1	245200000	246900000	752	chr1	245350000	246850000							chr1	245250000	246850000
chr1	247000000	247700000	777							chr1	246950000	247700000	chr1	246950000	247650000
chr10	1250000	3050000	72							chr10	1200000	2850000
chr10	3150000	4750000	22	chr10	3200000	4750000	chr10	3200000	4700000	chr10	3200000	4750000	chr10	3200000	4700000
chr10	4800000	5550000	33	chr10	4800000	5550000				chr10	4800000	5600000
chr10	6800000	7800000	79	chr10	6700000	7800000				chr10	6800000	7800000	chr10	6850000	7800000
chr10	7900000	9300000	76	chr10	8050000	9300000	chr10	7900000	9250000	chr10	7900000	9300000	chr10	7850000	9300000
chr10	9350000	11050000	34							chr10	9350000	11100000	chr10	9350000	11000000
chr10	12100000	13300000	26							chr10	11950000	13150000
chr10	13400000	15200000	46	chr10	13400000	15150000	chr10	13400000	15150000	chr10	13400000	15150000	chr10	13400000	15200000
chr10	13650000	14400000	67							chr10	13600000	14350000
chr10	14400000	15150000	30				chr10	14400000	15150000	chr10	14400000	15150000	chr10	14450000	15150000
chr10	15900000	16800000	53	chr10	15950000	16850000	chr10	15950000	16800000	chr10	15900000	16800000	chr10	15900000	16800000
chr10	17550000	18600000	12
chr10	19950000	21050000	44	chr10	20000000	21050000	chr10	19950000	21050000				chr10	19950000	21050000
chr10	21500000	22200000	80				chr10	21500000	22200000
chr10	21550000	23350000	23							chr10	21550000	23350000	chr10	21550000	23350000
chr10	22250000	23350000	45				chr10	22250000	23350000	chr10	22250000	23350000
chr10	26600000	27600000	38	chr10	26550000	27600000	chr10	26600000	27550000	chr10	26600000	27600000	chr10	26600000	27600000
chr10	27700000	28700000	48	chr10	27650000	28700000	chr10	27650000	28700000	chr10	27700000	28700000	chr10	27700000	28700000
chr10	28850000	29650000	40	chr10	28900000	29650000	chr10	28900000	29650000	chr10	28850000	29600000	chr10	28850000	29600000
chr10	30950000	32100000	28	chr10	30950000	32050000	chr10	30950000	32100000	chr10	30900000	32100000	chr10	30950000	32100000
chr10	32800000	33400000	55	chr10	32700000	33400000
chr10	32950000	35250000	5							chr10	32750000	35250000
chr10	33450000	34900000	50							chr10	33450000	34900000	chr10	33450000	34900000
chr10	35850000	39100000	63							chr10	35850000	39100000	chr10	35850000	39100000
chr10	35900000	37100000	77							chr10	35850000	37150000
chr10	37950000	38700000	7							chr10	38000000	38700000
chr10	42600000	43950000	10							chr10	42600000	43950000
chr10	44100000	45350000	32	chr10	44100000	45300000				chr10	44100000	45350000	chr10	44100000	45350000
chr10	52700000	54000000	15							chr10	52650000	54100000	chr10	52700000	54000000
chr10	54400000	56700000	29				chr10	54500000	56800000	chr10	54500000	56700000	chr10	54500000	56800000
chr10	54550000	55300000	19							chr10	54500000	55250000	chr10	54550000	55300000
chr10	55550000	56600000	83
chr10	57400000	59800000	25							chr10	57350000	59850000	chr10	57400000	59800000
chr10	57600000	58750000	75	chr10	57550000	58700000	chr10	57550000	58700000	chr10	57550000	58700000	chr10	57550000	58800000
chr10	60250000	62450000	13
chr10	60500000	61250000	16				chr10	60450000	61300000				chr10	60450000	61300000
chr10	62550000	63450000	60							chr10	62550000	63450000	chr10	62550000	63450000
chr10	64150000	64850000	14	chr10	64150000	64850000	chr10	64150000	64850000	chr10	64150000	64850000	chr10	64150000	64850000
chr10	64150000	65550000	3							chr10	64150000	65500000	chr10	64150000	65500000
chr10	65700000	69350000	17	chr10	65650000	69350000	chr10	65700000	69300000	chr10	65700000	69450000	chr10	65700000	69400000
chr10	65750000	68100000	6							chr10	65750000	68000000	chr10	65700000	68050000
chr10	67100000	67900000	64							chr10	67100000	67900000	chr10	67050000	67900000
chr10	68050000	68700000	82
chr10	72150000	73550000	74
chr10	73650000	75050000	42							chr10	73650000	74900000	chr10	73700000	74900000
chr10	77000000	77800000	18							chr10	77000000	77800000
chr10	77000000	78800000	62							chr10	77000000	78800000	chr10	77000000	78850000
chr10	78850000	79600000	4	chr10	78850000	79600000	chr10	78850000	79550000	chr10	78850000	79550000	chr10	78900000	79600000
chr10	79800000	80950000	54	chr10	79850000	80950000	chr10	79800000	80950000	chr10	79800000	80950000	chr10	79750000	80950000
chr10	81100000	82000000	52	chr10	81100000	82000000	chr10	81150000	82000000	chr10	81050000	81950000	chr10	81100000	82000000
chr10	82350000	85850000	8	chr10	82300000	85850000
chr10	85000000	85750000	66										chr10	84900000	85750000
chr10	86400000	88100000	68							chr10	86400000	88100000	chr10	86350000	88100000
chr10	87300000	88100000	81										chr10	87250000	88100000
chr10	89550000	90350000	11	chr10	89500000	90300000	chr10	89500000	90300000	chr10	89550000	90400000	chr10	89550000	90300000
chr10	91150000	93650000	20							chr10	91350000	93650000	chr10	91300000	93650000
chr10	91500000	92550000	39	chr10	91550000	92450000	chr10	91500000	92400000	chr10	91500000	92450000	chr10	91500000	92400000
chr10	92600000	93650000	47	chr10	92600000	93650000	chr10	92600000	93650000	chr10	92600000	93600000
chr10	94550000	95250000	71							chr10	94550000	95250000
chr10	95300000	96250000	85
chr10	98100000	99150000	59	chr10	98150000	99050000	chr10	98150000	99150000	chr10	98100000	99150000	chr10	98150000	99150000
chr10	99550000	101250000	31							chr10	99550000	101300000	chr10	99550000	101300000
chr10	102750000	103500000	65										chr10	102800000	103550000
chr10	104450000	105250000	35	chr10	104450000	105200000	chr10	104450000	105250000	chr10	104450000	105250000	chr10	104400000	105250000
chr10	105350000	106050000	56
chr10	106250000	108200000	41							chr10	106150000	108150000
chr10	108350000	110600000	37							chr10	108350000	110300000	chr10	108300000	110800000
chr10	110800000	111550000	43
chr10	114250000	115300000	51	chr10	114200000	115300000	chr10	114200000	115300000	chr10	114250000	115300000	chr10	114200000	115300000
chr10	117000000	118250000	58										chr10	117000000	118250000
chr10	118350000	118950000	24
chr10	118400000	120250000	9							chr10	118400000	120250000	chr10	118450000	120250000
chr10	119100000	120200000	27							chr10	119100000	120200000	chr10	119150000	120150000
chr10	120750000	121350000	57							chr10	120750000	121350000	chr10	120700000	121400000
chr10	121700000	122500000	84										chr10	121650000	122550000
chr10	121750000	124350000	21
chr10	122650000	123650000	49	chr10	122650000	123600000	chr10	122650000	123650000	chr10	122650000	123550000	chr10	122650000	123500000
chr10	123800000	124550000	78				chr10	123750000	124500000				chr10	123800000	124450000
chr10	124650000	126100000	61							chr10	124600000	126100000	chr10	124600000	126100000
chr10	126700000	127550000	69							chr10	126650000	127450000
chr10	130000000	130650000	86
chr10	130800000	131900000	73	chr10	130800000	131950000	chr10	130750000	131900000	chr10	130800000	131900000	chr10	130800000	131900000
chr10	132000000	133650000	70	chr10	132000000	133650000	chr10	132000000	133650000	chr10	132000000	133650000	chr10	132000000	133650000
chr10	133700000	135500000	36							chr10	133950000	135500000
chr11	900000	1600000	142	chr11	850000	1550000	chr11	850000	1550000	chr11	850000	1600000
chr11	2250000	3200000	146
chr11	6800000	7850000	120							chr11	6800000	7950000	chr11	6800000	7900000
chr11	8100000	8900000	136	chr11	8050000	8850000				chr11	8100000	8850000
chr11	9800000	10750000	163	chr11	9750000	10750000	chr11	9800000	10750000	chr11	9750000	10750000	chr11	9750000	10750000
chr11	10850000	12000000	140	chr11	10850000	11900000				chr11	10800000	11900000	chr11	10900000	11950000
chr11	14500000	15200000	182
chr11	15250000	16700000	143							chr11	15300000	16700000	chr11	15300000	16700000
chr11	16750000	17550000	135							chr11	16800000	17500000	chr11	16800000	17550000
chr11	18050000	18850000	145	chr11	18050000	18800000	chr11	18100000	18800000	chr11	18000000	18800000	chr11	18000000	18800000
chr11	19000000	20100000	152	chr11	18950000	20150000				chr11	19000000	20100000	chr11	19000000	20100000
chr11	20650000	22150000	156	chr11	20650000	22100000	chr11	20650000	22100000	chr11	20650000	22150000	chr11	20650000	22100000
chr11	21350000	22000000	180
chr11	22200000	22850000	121				chr11	22200000	22900000
chr11	22850000	26250000	105	chr11	22900000	26250000
chr11	22900000	24450000	170										chr11	22900000	24400000
chr11	26250000	27500000	151				chr11	26300000	27450000	chr11	26250000	27450000	chr11	26300000	27500000
chr11	27550000	29350000	93							chr11	27550000	29350000	chr11	27550000	29350000
chr11	27650000	28500000	126							chr11	27600000	28600000	chr11	27650000	28550000
chr11	28650000	29350000	167							chr11	28650000	29350000
chr11	29400000	31000000	153							chr11	29450000	31000000	chr11	29400000	31000000
chr11	29450000	30050000	184
chr11	30100000	31000000	144										chr11	30150000	31000000
chr11	31200000	32200000	114	chr11	31200000	32150000	chr11	31200000	32200000	chr11	31150000	32250000	chr11	31200000	32200000
chr11	32850000	36500000	90
chr11	33850000	34500000	165										chr11	33850000	34500000
chr11	34550000	35450000	102							chr11	34550000	35500000	chr11	34600000	35450000
chr11	35550000	36500000	104							chr11	35550000	36500000	chr11	35550000	36500000
chr11	36900000	38850000	159							chr11	36900000	38850000	chr11	36950000	38800000
chr11	36950000	37900000	166
chr11	39100000	40350000	178										chr11	38950000	40350000
chr11	41450000	43300000	137										chr11	41450000	43250000
chr11	41500000	42500000	174							chr11	41500000	42500000	chr11	41450000	42500000
chr11	42600000	43300000	128	chr11	42600000	43300000	chr11	42650000	43300000	chr11	42600000	43300000	chr11	42600000	43300000
chr11	44050000	45800000	161							chr11	44100000	45800000	chr11	44100000	45800000
chr11	44100000	44900000	179
chr11	46100000	47850000	106
chr11	48200000	49650000	99
chr11	48250000	49100000	110
chr11	55650000	56550000	130	chr11	55650000	56550000				chr11	55650000	56550000
chr11	57050000	59250000	117
chr11	57600000	58250000	157	chr11	57600000	58250000	chr11	57600000	58250000	chr11	57600000	58250000	chr11	57600000	58250000
chr11	59450000	60500000	148
chr11	60550000	61150000	139							chr11	60550000	61150000
chr11	61200000	63900000	119	chr11	61200000	64350000
chr11	61200000	64400000	107	chr11	61200000	64350000	chr11	61200000	64450000
chr11	61400000	62050000	175
chr11	62650000	63350000	149										chr11	62650000	63400000
chr11	65350000	66050000	185
chr11	66050000	67550000	164
chr11	68300000	69500000	108
chr11	68300000	71450000	129
chr11	68850000	69450000	100										chr11	68850000	69450000
chr11	71500000	72200000	150
chr11	75250000	76150000	169							chr11	75300000	76100000	chr11	75300000	76200000
chr11	78300000	79200000	176
chr11	79250000	81100000	125							chr11	79250000	81100000	chr11	79300000	81150000
chr11	79950000	81000000	173										chr11	80000000	81000000
chr11	81200000	82200000	101	chr11	81300000	82150000	chr11	81300000	82150000	chr11	81250000	82150000	chr11	81250000	82100000
chr11	83500000	84250000	162	chr11	83550000	84350000	chr11	83550000	84300000	chr11	83500000	84300000	chr11	83550000	84250000
chr11	84350000	85250000	127							chr11	84350000	85250000	chr11	84400000	85250000
chr11	85350000	86250000	103
chr11	87600000	88600000	92							chr11	87550000	88600000	chr11	87650000	88600000
chr11	88800000	89850000	98
chr11	89900000	92600000	122
chr11	89950000	91000000	171
chr11	91250000	92600000	181
chr11	91750000	92600000	187
chr11	92650000	93400000	138
chr11	93550000	94650000	172							chr11	93600000	94600000	chr11	93550000	94600000
chr11	94750000	95500000	88							chr11	94700000	95500000	chr11	94700000	95500000
chr11	96400000	99650000	87										chr11	96450000	99700000
chr11	96450000	99000000	96							chr11	96450000	99000000
chr11	96950000	99650000	89
chr11	97150000	99000000	109							chr11	97150000	98950000
chr11	98950000	99650000	183
chr11	101100000	101850000	118							chr11	101100000	101850000	chr11	101150000	101900000
chr11	101950000	102950000	112							chr11	101950000	102900000	chr11	102050000	102900000
chr11	103400000	105750000	124										chr11	103500000	105800000
chr11	103450000	104250000	160							chr11	103400000	104200000	chr11	103500000	104200000
chr11	104350000	105750000	177							chr11	104400000	105700000
chr11	104450000	105050000	186
chr11	105900000	107100000	154	chr11	105900000	107050000	chr11	105900000	107000000	chr11	105950000	107100000	chr11	105850000	107050000
chr11	107800000	108700000	131				chr11	107800000	108700000	chr11	107750000	108700000	chr11	107800000	108600000
chr11	108800000	109600000	134							chr11	108800000	109600000	chr11	108800000	109600000
chr11	109700000	111350000	113
chr11	110300000	111150000	116							chr11	110300000	111100000
chr11	112050000	113650000	155				chr11	112000000	113650000	chr11	112050000	113650000	chr11	112050000	113650000
chr11	114550000	116550000	94										chr11	114550000	116550000
chr11	115150000	116200000	95	chr11	115150000	116250000	chr11	115150000	116200000	chr11	115150000	116150000	chr11	115100000	116200000
chr11	119250000	120100000	97	chr11	119300000	120100000	chr11	119250000	120100000	chr11	119200000	120100000	chr11	119200000	120100000
chr11	120200000	121050000	123	chr11	120200000	120950000	chr11	120200000	120950000
chr11	121500000	122400000	115							chr11	121500000	122400000	chr11	121500000	122400000
chr11	122650000	123550000	132
chr11	124500000	126100000	158
chr11	126300000	127600000	147							chr11	126300000	127600000
chr11	128900000	129650000	133	chr11	128850000	129600000	chr11	128900000	129650000	chr11	128900000	129650000	chr11	128900000	129650000
chr11	130800000	131500000	141	chr11	130850000	131500000	chr11	130850000	131450000	chr11	130800000	131500000	chr11	130800000	131500000
chr11	131550000	132800000	168	chr11	131550000	132800000	chr11	131500000	132800000	chr11	131550000	132800000	chr11	131550000	132800000
chr11	132900000	133700000	111	chr11	132900000	133750000	chr11	132900000	133700000	chr11	132900000	133750000	chr11	132900000	133700000
chr11	133950000	134900000	91							chr11	133900000	134900000
chr12	1900000	2900000	273	chr12	1900000	2900000	chr12	1900000	2900000	chr12	1900000	2750000	chr12	1900000	2750000
chr12	3200000	3900000	254	chr12	3300000	3900000	chr12	3200000	3900000	chr12	3200000	3900000	chr12	3200000	3900000
chr12	3950000	4650000	215							chr12	3950000	4700000	chr12	3950000	4600000
chr12	5100000	6100000	233	chr12	5150000	6200000	chr12	5100000	6200000	chr12	5050000	6000000	chr12	5150000	6000000
chr12	6400000	7050000	264				chr12	6400000	7050000	chr12	6400000	7050000
chr12	7300000	8150000	239							chr12	7300000	8150000
chr12	8600000	9300000	223	chr12	8600000	9350000	chr12	8600000	9400000	chr12	8550000	9250000	chr12	8600000	9300000
chr12	11650000	12900000	230							chr12	11650000	12850000	chr12	11650000	12900000
chr12	13150000	14200000	219							chr12	13000000	14200000	chr12	13050000	14150000
chr12	16200000	17850000	250	chr12	16150000	17900000
chr12	18250000	19400000	274	chr12	18400000	19500000	chr12	18300000	19500000	chr12	18250000	19400000	chr12	18250000	19400000
chr12	18250000	21350000	198
chr12	19550000	20550000	269							chr12	19550000	20700000	chr12	19600000	20700000
chr12	21350000	22700000	268							chr12	21400000	22800000	chr12	21350000	22600000
chr12	23300000	24950000	265							chr12	23200000	24950000
chr12	24150000	24950000	270							chr12	24100000	24900000	chr12	24100000	24900000
chr12	25550000	26150000	206							chr12	25550000	26150000	chr12	25550000	26150000
chr12	27900000	29100000	217	chr12	27900000	29000000	chr12	27900000	29000000	chr12	27900000	29150000	chr12	27900000	29100000
chr12	29550000	31100000	222							chr12	29550000	31000000	chr12	29550000	30950000
chr12	31450000	32850000	196
chr12	32900000	34800000	199
chr12	33050000	34150000	190										chr12	33150000	34100000
chr12	38700000	39500000	204							chr12	38700000	39550000	chr12	38700000	39600000
chr12	41250000	44050000	195							chr12	41300000	43800000	chr12	41300000	43800000
chr12	41350000	42400000	267	chr12	41350000	42400000	chr12	41350000	42400000	chr12	41350000	42400000	chr12	41400000	42400000
chr12	42900000	43800000	251	chr12	42900000	43900000	chr12	42850000	43750000	chr12	42850000	43800000	chr12	42900000	43750000
chr12	44300000	45350000	228	chr12	44300000	45350000	chr12	44300000	45350000	chr12	44300000	45300000	chr12	44300000	45350000
chr12	45500000	46300000	238	chr12	45500000	46300000	chr12	45500000	46300000	chr12	45500000	46300000	chr12	45500000	46300000
chr12	46350000	47150000	259
chr12	46350000	48050000	216	chr12	46350000	48050000				chr12	46350000	48050000	chr12	46350000	48050000
chr12	47350000	48050000	241										chr12	47350000	48050000
chr12	48200000	49150000	247				chr12	48150000	49050000	chr12	48200000	49050000	chr12	48100000	49050000
chr12	49450000	50100000	282
chr12	50450000	51750000	276
chr12	51150000	51750000	253							chr12	51150000	51750000	chr12	51150000	51750000
chr12	51800000	53350000	242				chr12	51800000	53350000				chr12	51950000	53500000
chr12	53950000	54850000	244							chr12	53900000	54850000
chr12	54950000	56050000	202							chr12	54950000	56050000	chr12	54950000	56050000
chr12	56450000	58150000	197							chr12	56450000	58100000
chr12	58350000	59600000	245							chr12	58350000	59600000	chr12	58350000	59550000
chr12	60750000	62350000	262							chr12	60800000	62350000	chr12	60650000	62450000
chr12	63400000	64750000	263							chr12	63500000	64750000	chr12	63450000	64750000
chr12	64050000	64750000	236							chr12	64000000	64750000
chr12	65150000	67250000	232							chr12	65150000	67250000	chr12	65150000	67250000
chr12	65900000	67100000	224
chr12	67550000	68400000	211							chr12	67650000	68450000	chr12	67650000	68450000
chr12	68550000	69200000	205	chr12	68550000	69250000	chr12	68550000	69200000	chr12	68550000	69200000	chr12	68550000	69200000
chr12	70150000	71050000	220	chr12	70200000	71050000	chr12	70200000	71100000	chr12	70150000	71100000	chr12	70200000	71050000
chr12	72400000	74950000	213							chr12	72350000	74950000	chr12	72400000	74950000
chr12	74250000	74950000	284										chr12	74350000	74950000
chr12	75050000	75700000	229							chr12	75050000	75650000	chr12	75050000	75650000
chr12	75750000	76950000	231	chr12	75750000	76950000	chr12	75800000	76950000	chr12	75700000	76950000	chr12	75750000	76950000
chr12	77400000	78300000	279	chr12	77400000	78300000	chr12	77450000	78300000	chr12	77400000	78300000	chr12	77350000	78300000
chr12	78350000	81650000	191				chr12	78350000	81650000
chr12	78500000	79750000	258							chr12	78400000	79750000	chr12	78500000	79750000
chr12	79800000	81650000	246
chr12	80700000	81600000	260							chr12	80750000	81550000	chr12	80750000	81550000
chr12	81900000	85000000	200
chr12	82050000	82750000	189
chr12	82800000	83500000	280
chr12	82800000	85000000	240							chr12	82800000	84900000	chr12	82750000	84900000
chr12	85500000	86350000	243
chr12	86450000	88350000	249							chr12	86350000	88350000	chr12	86400000	88350000
chr12	86500000	87300000	285
chr12	87450000	88350000	271										chr12	87350000	88350000
chr12	88400000	89350000	235							chr12	88450000	89350000	chr12	88450000	89350000
chr12	90600000	91250000	266
chr12	91750000	93050000	221	chr12	91750000	93050000	chr12	91750000	93100000	chr12	91750000	93050000	chr12	91750000	93050000
chr12	93100000	93800000	188	chr12	93100000	93850000				chr12	93100000	93800000	chr12	93150000	93800000
chr12	93150000	95950000	209
chr12	94500000	95400000	278							chr12	94500000	95400000	chr12	94500000	95400000
chr12	96950000	98850000	257							chr12	96950000	98800000	chr12	96950000	98850000
chr12	99400000	100150000	214	chr12	99400000	100150000	chr12	99400000	100150000	chr12	99400000	100150000	chr12	99400000	100150000
chr12	100300000	101100000	281
chr12	102050000	104100000	212							chr12	102050000	104100000	chr12	102100000	104150000
chr12	102300000	103200000	218				chr12	102150000	103150000	chr12	102250000	103150000	chr12	102250000	103150000
chr12	104600000	105550000	193							chr12	104550000	105550000	chr12	104550000	105550000
chr12	105900000	106600000	192	chr12	105950000	106550000
chr12	106650000	107400000	201	chr12	106700000	107450000	chr12	106650000	107450000	chr12	106700000	107400000	chr12	106700000	107400000
chr12	108050000	109750000	226							chr12	108050000	109800000
chr12	108100000	108900000	275
chr12	110300000	111300000	272
chr12	110300000	112900000	203
chr12	112250000	112900000	252
chr12	114400000	115000000	255										chr12	114400000	115000000
chr12	114400000	116300000	208							chr12	114400000	116300000	chr12	114400000	116300000
chr12	115050000	116300000	237							chr12	115100000	116300000	chr12	115050000	116300000
chr12	116350000	117400000	207							chr12	116400000	117500000	chr12	116400000	117400000
chr12	117600000	118250000	194							chr12	117600000	118250000	chr12	117650000	118250000
chr12	117600000	120050000	225							chr12	117600000	120050000	chr12	117600000	120050000
chr12	118850000	120050000	261	chr12	118850000	120000000				chr12	118850000	120050000	chr12	118850000	120050000
chr12	120750000	121650000	248							chr12	120750000	121700000	chr12	120750000	121700000
chr12	123300000	124200000	277
chr12	124250000	125450000	227	chr12	124250000	125350000	chr12	124250000	125350000	chr12	124250000	125400000	chr12	124250000	125400000
chr12	125650000	128550000	234	chr12	125700000	128250000	chr12	125650000	128550000	chr12	125650000	128150000	chr12	125650000	128550000
chr12	128750000	131150000	210	chr12	128750000	131200000
chr12	130500000	131200000	283
chr12	131250000	132350000	256	chr12	131300000	132300000	chr12	131250000	132350000	chr12	131250000	132300000	chr12	131250000	132450000
chr13	19000000	20150000	286							chr13	19000000	20150000	chr13	19000000	20150000
chr13	20550000	22050000	308	chr13	20650000	22050000	chr13	20650000	22050000	chr13	20550000	22050000	chr13	20500000	22000000
chr13	20600000	21500000	321	chr13	20700000	21500000				chr13	20600000	21500000
chr13	22150000	23050000	293	chr13	22200000	23000000	chr13	22200000	23050000
chr13	22150000	23750000	290	chr13	22150000	23800000	chr13	22150000	23750000	chr13	22150000	23850000	chr13	22150000	23850000
chr13	23850000	24800000	340
chr13	24900000	25900000	358
chr13	25950000	27400000	306				chr13	26000000	27250000	chr13	25950000	27400000	chr13	25950000	27350000
chr13	26050000	26650000	291										chr13	26050000	26650000
chr13	26700000	27300000	325
chr13	27500000	28550000	326	chr13	27500000	28550000	chr13	27500000	28550000	chr13	27500000	28550000	chr13	27450000	28550000
chr13	28600000	29300000	307	chr13	28600000	29350000	chr13	28600000	29350000				chr13	28600000	29350000
chr13	30050000	31600000	304				chr13	30050000	31650000	chr13	30050000	31650000	chr13	30050000	31650000
chr13	30700000	31450000	322				chr13	30700000	31400000	chr13	30700000	31500000
chr13	33150000	34400000	301							chr13	33150000	34400000	chr13	33150000	34400000
chr13	34700000	35700000	346				chr13	34700000	35700000	chr13	34700000	35700000
chr13	35750000	36400000	360							chr13	35750000	36350000
chr13	36500000	37500000	352				chr13	36500000	37500000	chr13	36550000	37550000	chr13	36500000	37550000
chr13	36500000	39500000	294
chr13	37650000	39450000	334	chr13	37650000	39450000	chr13	37650000	39450000	chr13	37600000	39450000	chr13	37650000	39450000
chr13	38300000	39200000	337										chr13	38300000	39200000
chr13	39550000	40200000	289	chr13	39600000	40200000				chr13	39550000	40200000	chr13	39600000	40200000
chr13	40300000	41350000	299	chr13	40250000	41200000	chr13	40250000	41200000	chr13	40300000	41300000	chr13	40250000	41300000
chr13	41900000	42800000	314	chr13	41900000	42800000	chr13	41800000	42800000	chr13	41900000	42800000	chr13	41900000	42800000
chr13	43150000	44400000	333	chr13	43150000	44500000
chr13	43150000	45500000	328							chr13	43150000	45450000
chr13	43650000	44400000	345										chr13	43650000	44400000
chr13	44450000	45500000	344	chr13	44450000	45500000	chr13	44450000	45500000	chr13	44450000	45500000	chr13	44450000	45500000
chr13	46050000	46950000	348	chr13	46050000	46900000	chr13	46050000	46950000	chr13	46050000	46950000	chr13	46050000	46950000
chr13	47350000	48400000	302							chr13	47400000	48350000	chr13	47350000	48400000
chr13	48500000	49350000	311							chr13	48550000	49350000	chr13	48550000	49300000
chr13	50450000	51650000	315							chr13	50450000	51600000	chr13	50450000	51600000
chr13	51700000	52450000	309				chr13	51700000	52550000
chr13	51700000	53000000	298
chr13	53750000	58050000	292	chr13	53750000	58100000	chr13	53750000	58050000	chr13	53750000	58050000	chr13	53750000	58050000
chr13	58150000	59900000	316	chr13	58150000	59850000	chr13	58150000	59850000	chr13	58150000	59850000	chr13	58150000	59850000
chr13	59950000	61000000	312							chr13	60050000	61050000
chr13	61150000	62250000	310	chr13	61150000	62250000	chr13	61100000	62100000	chr13	61150000	62300000	chr13	61150000	62200000
chr13	65000000	67850000	300
chr13	65100000	66150000	354							chr13	65150000	66150000	chr13	65000000	66150000
chr13	66250000	67800000	324							chr13	66350000	67800000	chr13	66250000	67800000
chr13	68000000	69950000	335							chr13	68250000	70000000
chr13	68850000	69950000	359							chr13	68750000	69900000
chr13	70000000	71150000	351
chr13	71200000	73100000	342							chr13	71150000	73250000	chr13	71200000	73200000
chr13	73350000	75850000	297							chr13	73350000	75850000	chr13	73350000	75850000
chr13	73500000	74250000	318
chr13	74900000	75800000	347							chr13	74950000	75800000
chr13	76350000	77500000	303	chr13	76300000	77500000	chr13	76200000	77500000	chr13	76250000	77500000	chr13	76200000	77500000
chr13	78350000	79850000	313	chr13	78350000	79900000	chr13	78350000	79900000	chr13	78350000	79900000	chr13	78350000	79850000
chr13	80150000	81550000	327							chr13	80150000	81550000	chr13	80150000	81550000
chr13	80200000	81000000	339							chr13	80200000	80900000
chr13	81600000	82550000	356
chr13	84050000	85250000	353							chr13	83900000	85300000	chr13	83900000	85250000
chr13	85400000	86400000	288				chr13	85450000	86350000	chr13	85400000	86400000	chr13	85400000	86400000
chr13	88600000	89750000	341							chr13	88600000	89700000
chr13	90100000	91650000	350
chr13	90600000	91650000	355				chr13	90700000	91650000
chr13	91700000	92550000	357
chr13	92750000	95000000	330							chr13	92750000	95000000	chr13	92750000	95000000
chr13	93150000	93950000	361
chr13	95150000	96550000	338
chr13	96750000	97600000	320	chr13	96750000	97550000	chr13	96750000	97550000	chr13	96700000	97600000	chr13	96700000	97550000
chr13	97650000	98450000	329							chr13	97650000	98400000	chr13	97650000	98450000
chr13	98500000	99500000	336	chr13	98500000	99500000	chr13	98550000	99500000	chr13	98500000	99500000	chr13	98500000	99450000
chr13	99700000	101300000	323
chr13	100250000	101200000	317				chr13	100250000	101250000	chr13	100250000	101200000	chr13	100300000	101150000
chr13	101750000	103200000	319	chr13	101800000	103100000	chr13	101700000	103150000	chr13	101750000	103150000	chr13	101750000	103150000
chr13	101800000	102550000	349										chr13	101750000	102500000
chr13	103500000	104500000	331	chr13	103500000	104400000
chr13	103500000	107750000	295				chr13	103500000	107750000	chr13	103500000	107700000	chr13	103800000	107750000
chr13	103500000	107750000	295				chr13	103500000	107750000	chr13	103500000	107700000	chr13	104000000	107650000
chr13	107800000	108800000	343				chr13	107800000	108800000	chr13	107800000	108750000
chr13	108850000	109550000	305	chr13	108850000	109550000	chr13	108850000	109550000	chr13	108800000	109550000	chr13	108850000	109550000
chr13	108850000	111000000	287
chr13	109600000	110800000	332	chr13	109600000	110800000	chr13	109600000	110800000	chr13	109600000	110800000	chr13	109600000	110800000
chr13	110850000	111900000	296
chr14	22650000	23500000	397	chr14	22750000	23550000	chr14	22750000	23500000	chr14	22700000	23500000	chr14	22650000	23450000
chr14	23700000	24900000	392							chr14	23700000	24900000
chr14	24950000	25700000	366							chr14	24950000	25700000	chr14	24950000	25700000
chr14	25900000	29100000	379							chr14	25750000	29100000	chr14	25900000	29100000
chr14	27600000	29050000	419
chr14	29150000	30950000	395							chr14	29300000	30950000	chr14	29150000	30950000
chr14	30000000	30700000	400										chr14	30000000	30650000
chr14	31050000	31850000	388							chr14	31050000	31850000	chr14	31050000	31850000
chr14	31850000	34950000	363
chr14	31900000	32950000	399	chr14	31950000	32950000	chr14	31950000	32900000	chr14	31900000	32950000	chr14	31900000	32950000
chr14	33000000	34850000	384							chr14	33000000	34750000	chr14	33000000	34850000
chr14	35000000	36250000	393	chr14	35000000	36250000	chr14	35000000	36250000	chr14	35000000	36250000	chr14	35000000	36250000
chr14	37650000	39250000	391	chr14	37650000	39300000				chr14	37500000	39250000	chr14	37650000	39300000
chr14	38400000	39100000	404
chr14	39950000	42050000	402							chr14	39900000	42050000	chr14	39900000	42050000
chr14	42150000	45300000	394				chr14	42200000	45300000	chr14	42250000	45300000	chr14	42150000	45300000
chr14	42350000	43250000	422
chr14	45850000	46800000	412							chr14	45850000	46800000	chr14	45900000	46800000
chr14	46900000	47750000	423
chr14	46900000	49850000	370
chr14	48100000	49800000	398
chr14	50050000	51250000	390							chr14	50050000	51250000	chr14	50050000	51300000
chr14	51450000	52550000	405							chr14	51450000	52650000	chr14	51350000	52400000
chr14	53800000	54800000	377	chr14	53850000	54800000	chr14	53900000	54800000	chr14	53800000	54800000	chr14	53850000	54800000
chr14	55850000	58600000	376							chr14	56150000	58550000	chr14	55900000	58600000
chr14	56150000	56900000	396	chr14	56150000	56900000	chr14	56150000	56900000	chr14	56150000	56900000	chr14	56150000	56900000
chr14	56950000	57750000	408							chr14	56950000	57800000	chr14	56950000	57750000
chr14	57850000	58600000	378							chr14	57900000	58600000	chr14	57850000	58600000
chr14	58850000	59900000	380	chr14	58950000	59900000	chr14	58950000	59900000	chr14	58750000	59900000	chr14	58850000	59900000
chr14	61050000	61650000	373				chr14	61050000	61700000	chr14	61050000	61650000	chr14	61050000	61650000
chr14	61750000	62350000	386
chr14	62650000	63700000	372							chr14	62600000	63700000	chr14	62600000	63700000
chr14	63850000	64950000	385							chr14	63850000	64950000	chr14	63850000	64950000
chr14	65100000	67800000	362
chr14	65450000	66500000	371							chr14	65500000	66400000	chr14	65450000	66550000
chr14	66750000	67750000	365							chr14	66800000	67650000	chr14	66800000	67700000
chr14	68450000	69300000	368							chr14	68300000	69300000	chr14	68500000	69300000
chr14	71450000	73400000	381	chr14	71450000	73400000	chr14	71450000	73400000	chr14	71500000	73400000	chr14	71500000	73350000
chr14	71500000	72900000	364
chr14	73450000	74500000	410	chr14	73450000	74450000	chr14	73450000	74500000	chr14	73500000	74500000	chr14	73500000	74500000
chr14	75300000	76100000	420							chr14	75350000	76100000	chr14	75300000	76100000
chr14	76150000	77100000	401							chr14	76150000	77100000
chr14	78300000	79300000	403	chr14	78300000	79300000	chr14	78300000	79300000	chr14	78300000	79300000	chr14	78300000	79300000
chr14	79350000	81550000	383							chr14	79350000	81650000	chr14	79350000	81550000
chr14	79400000	80450000	418							chr14	79400000	80400000	chr14	79400000	80450000
chr14	82050000	83150000	417
chr14	83700000	88150000	375
chr14	87400000	88100000	415							chr14	87400000	88100000	chr14	87450000	88150000
chr14	89450000	90400000	374	chr14	89450000	90300000	chr14	89450000	90400000	chr14	89450000	90350000	chr14	89450000	90400000
chr14	90500000	91200000	409				chr14	90550000	91250000	chr14	90500000	91200000	chr14	90500000	91200000
chr14	92500000	93200000	413							chr14	92500000	93200000	chr14	92500000	93200000
chr14	93300000	94600000	411
chr14	95050000	96950000	382										chr14	95050000	96900000
chr14	97400000	99800000	407				chr14	97400000	99850000	chr14	97350000	99850000	chr14	97400000	99800000
chr14	97550000	98300000	421
chr14	98350000	99750000	406							chr14	98300000	99800000
chr14	99900000	100700000	387	chr14	99900000	100800000	chr14	99900000	100650000	chr14	99900000	100800000	chr14	99900000	100700000
chr14	101350000	102100000	367
chr14	102150000	102800000	389
chr14	102850000	103900000	414							chr14	102800000	103950000	chr14	102800000	103850000
chr14	104400000	105150000	369										chr14	104350000	105150000
chr14	105300000	105900000	416
chr15	23750000	25900000	448
chr15	23750000	26550000	424
chr15	27100000	28250000	466							chr15	27100000	28250000	chr15	27100000	28250000
chr15	28350000	29150000	443
chr15	29300000	30350000	426										chr15	29300000	30350000
chr15	30850000	31850000	427										chr15	30950000	31800000
chr15	32950000	34250000	446							chr15	32950000	34250000	chr15	32900000	34250000
chr15	34300000	35200000	467							chr15	34300000	35250000	chr15	34300000	35200000
chr15	35300000	38200000	431							chr15	35300000	38200000	chr15	35300000	38200000
chr15	35950000	36700000	463
chr15	36750000	37400000	433	chr15	36750000	37400000	chr15	36800000	37400000	chr15	36750000	37400000	chr15	36700000	37400000
chr15	37450000	38150000	441							chr15	37450000	38150000	chr15	37450000	38150000
chr15	38250000	38950000	434
chr15	39000000	40000000	455	chr15	39000000	40000000	chr15	39100000	40000000	chr15	39000000	40000000	chr15	39000000	40050000
chr15	40900000	41650000	480	chr15	40900000	41650000
chr15	41700000	43800000	478										chr15	41700000	43900000
chr15	44050000	45300000	444
chr15	44100000	44800000	473							chr15	44050000	44800000	chr15	44050000	44750000
chr15	45950000	48350000	454							chr15	45950000	48350000	chr15	46000000	48350000
chr15	48600000	50550000	447							chr15	48600000	50600000
chr15	49500000	50400000	450							chr15	49500000	50550000	chr15	49500000	50400000
chr15	50500000	51250000	470
chr15	52100000	53000000	459	chr15	52100000	53000000				chr15	52100000	53000000
chr15	53050000	54050000	439							chr15	53050000	54050000	chr15	53050000	54000000
chr15	54200000	55450000	445							chr15	54200000	55450000	chr15	54150000	55450000
chr15	56750000	57800000	457										chr15	56750000	57800000
chr15	58400000	59900000	451										chr15	58450000	59950000
chr15	58500000	59150000	449							chr15	58450000	59150000	chr15	58500000	59150000
chr15	59200000	59900000	429							chr15	59200000	59900000	chr15	59200000	59900000
chr15	59950000	63350000	435	chr15	60000000	63350000
chr15	61350000	62100000	461				chr15	61400000	62100000	chr15	61400000	62100000	chr15	61400000	62100000
chr15	64450000	65550000	476							chr15	64450000	65550000	chr15	64450000	65550000
chr15	65600000	66800000	475							chr15	65650000	66750000
chr15	66900000	68550000	468							chr15	66950000	68550000	chr15	66900000	68500000
chr15	68600000	69650000	474				chr15	68650000	69600000	chr15	68650000	69650000
chr15	69750000	70850000	442	chr15	69750000	70850000	chr15	69750000	70850000	chr15	69750000	70900000	chr15	69750000	70900000
chr15	71050000	71950000	471							chr15	71100000	71950000
chr15	72900000	74150000	472							chr15	72850000	74150000
chr15	75100000	76100000	458
chr15	76200000	78100000	462										chr15	76200000	78100000
chr15	76250000	77200000	456							chr15	76250000	77150000	chr15	76300000	77200000
chr15	77250000	77900000	428							chr15	77250000	77900000
chr15	78150000	79150000	469
chr15	79550000	80600000	436				chr15	79400000	80550000	chr15	79550000	80600000	chr15	79550000	80550000
chr15	80700000	81450000	438
chr15	84050000	84750000	452										chr15	84050000	84750000
chr15	85050000	86300000	432
chr15	86400000	88850000	460							chr15	86400000	88900000	chr15	86400000	88900000
chr15	90100000	91550000	440							chr15	90100000	91500000
chr15	90650000	91500000	437							chr15	90650000	91500000	chr15	90650000	91500000
chr15	91700000	93250000	453										chr15	91600000	93250000
chr15	93600000	94600000	464	chr15	93650000	94600000	chr15	93650000	94650000	chr15	93600000	94600000	chr15	93600000	94600000
chr15	95750000	96850000	465	chr15	95750000	96850000	chr15	95750000	96850000	chr15	95750000	96850000	chr15	95750000	96850000
chr15	96900000	97800000	479	chr15	96900000	97750000							chr15	96950000	97800000
chr15	97850000	98800000	477
chr15	99000000	102400000	425				chr15	99150000	102400000
chr15	99050000	100400000	430							chr15	99050000	100350000	chr15	99050000	100350000
chr16	2000000	2850000	526										chr16	2000000	2950000
chr16	3200000	5050000	497
chr16	4450000	5100000	524
chr16	5200000	8450000	514				chr16	5250000	8500000	chr16	5250000	8500000	chr16	5250000	8450000
chr16	5250000	6700000	517	chr16	5300000	6700000	chr16	5400000	6700000				chr16	5250000	6700000
chr16	6750000	8400000	521							chr16	6750000	8450000	chr16	6750000	8400000
chr16	8600000	10800000	493							chr16	8600000	10950000	chr16	8600000	10950000
chr16	9200000	10800000	484							chr16	9200000	10800000	chr16	9200000	10800000
chr16	11000000	11950000	506							chr16	11050000	11950000	chr16	11050000	12100000
chr16	12150000	14600000	485
chr16	12350000	13950000	504							chr16	12250000	13950000	chr16	12250000	13950000
chr16	14000000	14750000	489							chr16	14000000	14750000	chr16	14000000	14750000
chr16	16600000	17650000	491
chr16	16600000	18350000	482
chr16	19550000	20700000	494							chr16	19550000	20700000	chr16	19550000	20600000
chr16	21600000	22200000	483
chr16	23500000	25100000	499							chr16	23550000	25000000
chr16	25300000	27100000	500	chr16	25300000	27050000	chr16	25300000	27050000	chr16	25300000	27050000	chr16	25300000	27050000
chr16	25800000	26500000	531							chr16	25750000	26500000
chr16	29050000	30050000	508
chr16	31500000	35250000	481							chr16	31500000	35250000	chr16	31950000	35250000
chr16	46950000	48300000	488
chr16	48700000	49800000	507
chr16	50000000	50850000	490	chr16	50000000	50850000	chr16	50000000	50850000	chr16	50000000	50850000	chr16	50000000	50850000
chr16	51050000	52000000	503							chr16	51100000	51950000	chr16	51050000	51900000
chr16	52100000	53000000	498	chr16	52050000	53000000	chr16	52100000	53000000	chr16	52050000	52950000	chr16	52050000	52950000
chr16	53550000	55400000	502	chr16	53550000	55400000	chr16	53550000	55350000				chr16	53550000	55400000
chr16	53550000	56200000	495
chr16	56400000	58650000	496							chr16	56450000	58600000	chr16	56400000	58650000
chr16	56750000	57500000	533
chr16	57600000	58550000	520
chr16	58800000	62150000	511	chr16	58800000	62150000				chr16	58800000	62150000	chr16	58800000	62200000
chr16	59200000	60950000	487
chr16	62200000	63300000	523	chr16	62200000	63250000	chr16	62200000	63250000				chr16	62200000	63300000
chr16	63350000	65200000	519							chr16	63400000	65200000
chr16	65250000	66300000	518
chr16	67500000	68300000	530
chr16	68400000	69300000	510	chr16	68450000	69300000	chr16	68450000	69300000	chr16	68400000	69300000	chr16	68400000	69300000
chr16	72100000	74250000	512							chr16	72050000	74250000	chr16	72100000	74250000
chr16	72150000	73300000	525										chr16	72100000	73300000
chr16	74500000	75650000	513							chr16	74500000	75650000	chr16	74550000	75600000
chr16	75800000	77200000	509							chr16	75800000	77200000	chr16	75800000	77200000
chr16	77250000	78100000	529							chr16	77250000	78050000
chr16	78150000	80850000	515				chr16	78150000	80900000	chr16	78150000	80850000	chr16	78150000	80700000
chr16	78400000	79600000	532							chr16	78500000	79600000
chr16	79700000	80500000	528							chr16	79700000	80500000	chr16	79650000	80500000
chr16	81000000	81950000	492	chr16	81050000	81950000	chr16	81050000	82100000	chr16	81050000	81950000	chr16	81000000	82000000
chr16	82250000	83650000	505	chr16	82250000	83700000	chr16	82250000	83600000	chr16	82250000	83600000	chr16	82250000	83650000
chr16	83900000	85000000	522	chr16	83900000	85000000				chr16	83900000	85000000	chr16	83950000	84950000
chr16	85050000	85750000	527	chr16	85050000	85750000	chr16	85050000	85750000	chr16	85100000	85750000	chr16	85050000	85750000
chr16	86100000	87300000	516	chr16	86100000	87300000
chr16	87950000	88600000	501	chr16	87950000	88600000				chr16	87950000	88600000
chr16	88650000	90150000	486				chr16	88650000	90100000
chr17	1550000	2350000	573							chr17	1550000	2450000
chr17	2650000	3500000	547	chr17	2650000	3450000	chr17	2650000	3450000	chr17	2600000	3500000	chr17	2600000	3550000
chr17	3750000	4800000	567							chr17	3750000	4900000	chr17	3800000	4800000
chr17	5400000	6850000	541							chr17	5400000	6750000
chr17	8250000	9450000	564							chr17	8250000	9450000	chr17	8200000	9450000
chr17	9650000	10600000	551							chr17	9650000	10550000	chr17	9700000	10600000
chr17	10750000	11800000	560							chr17	10750000	11800000	chr17	10750000	11850000
chr17	11900000	12900000	561	chr17	12000000	12900000	chr17	12000000	12900000	chr17	12000000	12900000	chr17	11950000	12900000
chr17	13000000	15100000	543
chr17	16650000	18000000	571
chr17	19900000	20900000	544
chr17	25300000	26800000	546
chr17	27450000	30500000	534	chr17	27150000	30600000
chr17	27600000	29050000	577
chr17	29150000	30400000	565							chr17	29150000	30250000	chr17	29150000	30250000
chr17	31300000	32200000	562
chr17	31300000	33250000	542							chr17	31300000	33200000
chr17	34900000	35650000	535
chr17	36900000	37550000	580	chr17	36800000	37550000				chr17	36850000	37550000
chr17	37600000	38400000	578
chr17	38750000	39800000	536							chr17	38700000	39800000	chr17	38750000	39800000
chr17	40000000	41100000	570
chr17	46000000	46700000	545	chr17	46000000	46700000	chr17	46000000	46700000	chr17	46100000	46700000
chr17	47400000	48100000	576							chr17	47450000	48150000
chr17	49600000	52900000	557	chr17	49400000	53000000				chr17	49600000	52950000	chr17	49450000	52950000
chr17	53000000	53700000	556
chr17	53000000	54800000	558							chr17	53000000	54800000	chr17	53050000	54800000
chr17	53850000	54800000	568							chr17	53850000	54800000
chr17	54950000	56250000	540
chr17	57250000	58150000	572
chr17	58700000	61700000	537
chr17	58750000	59600000	554							chr17	58750000	59600000	chr17	58750000	59600000
chr17	58750000	60300000	555							chr17	58750000	60250000	chr17	58750000	60250000
chr17	60600000	61750000	550							chr17	60600000	61600000
chr17	62750000	65050000	553
chr17	63200000	64150000	539							chr17	63200000	64100000	chr17	63200000	64100000
chr17	66500000	67350000	549				chr17	66550000	67300000
chr17	67500000	68600000	563	chr17	67550000	68550000	chr17	67550000	68550000	chr17	67550000	68550000	chr17	67500000	68600000
chr17	67500000	70650000	538
chr17	68650000	69400000	574
chr17	70550000	71350000	569	chr17	70550000	71350000				chr17	70650000	71350000	chr17	70550000	71350000
chr17	71400000	72150000	552	chr17	71400000	72100000	chr17	71400000	72100000	chr17	71400000	72150000	chr17	71400000	72150000
chr17	72900000	73700000	579	chr17	72900000	73700000	chr17	72900000	73700000	chr17	72900000	73700000	chr17	72900000	73700000
chr17	73850000	74500000	566	chr17	73800000	74550000				chr17	73850000	74500000	chr17	73800000	74500000
chr17	74700000	76200000	559	chr17	74750000	76100000	chr17	74750000	76250000	chr17	74700000	76200000	chr17	74750000	76200000
chr17	75300000	76050000	575				chr17	75350000	76000000				chr17	75300000	76050000
chr17	78050000	79100000	548							chr17	78050000	79100000	chr17	78050000	79050000
chr18	3250000	5050000	583
chr18	4000000	5050000	596	chr18	4000000	5050000	chr18	4000000	5000000	chr18	4000000	5050000	chr18	4000000	5050000
chr18	5800000	6850000	590							chr18	5800000	6950000
chr18	7100000	8450000	613							chr18	7200000	8400000	chr18	7050000	8400000
chr18	8550000	9750000	619	chr18	8600000	9650000	chr18	8600000	9650000	chr18	8600000	9750000	chr18	8600000	9700000
chr18	9800000	12200000	586
chr18	9900000	11550000	584							chr18	9900000	11600000	chr18	9900000	11600000
chr18	10550000	11500000	601
chr18	13800000	14400000	615
chr18	18500000	20250000	599	chr18	18500000	20300000	chr18	18500000	20300000	chr18	18500000	20300000	chr18	18500000	20300000
chr18	19500000	20300000	595							chr18	19500000	20250000
chr18	20350000	21100000	597	chr18	20350000	21100000	chr18	20350000	21100000	chr18	20350000	21100000	chr18	20350000	21050000
chr18	20350000	21700000	604	chr18	20350000	21700000	chr18	20350000	21650000	chr18	20350000	21700000	chr18	20350000	21700000
chr18	22000000	23450000	606	chr18	22050000	23450000	chr18	22050000	23450000	chr18	21850000	23450000	chr18	22000000	23400000
chr18	25200000	27300000	614										chr18	25350000	27350000
chr18	27400000	28550000	618
chr18	30750000	31350000	632
chr18	30750000	32450000	593							chr18	30750000	32400000	chr18	30800000	32400000
chr18	31400000	32350000	611										chr18	31300000	32400000
chr18	32550000	34400000	609	chr18	32600000	34400000	chr18	32600000	34400000	chr18	32750000	34400000	chr18	32600000	34400000
chr18	33600000	34350000	625										chr18	33650000	34350000
chr18	34450000	35050000	630
chr18	35200000	37150000	598							chr18	35200000	37100000	chr18	35150000	37100000
chr18	37150000	37850000	633							chr18	37150000	37850000	chr18	37200000	37900000
chr18	38000000	39450000	628							chr18	38000000	39500000	chr18	38000000	39350000
chr18	39600000	41000000	620	chr18	39800000	41050000	chr18	39800000	41000000	chr18	39600000	41000000	chr18	39600000	41000000
chr18	40150000	40900000	623
chr18	42050000	42950000	594	chr18	42000000	42950000	chr18	42000000	42950000	chr18	42050000	43000000	chr18	42050000	42950000
chr18	43700000	44450000	626				chr18	43700000	44550000	chr18	43700000	44550000	chr18	43700000	44500000
chr18	44550000	45250000	629										chr18	44600000	45350000
chr18	44550000	45850000	612
chr18	45950000	48000000	588
chr18	46150000	46950000	589	chr18	46150000	46950000	chr18	46150000	46950000	chr18	46100000	46950000	chr18	46150000	46950000
chr18	47050000	48100000	621
chr18	48250000	49000000	627
chr18	48550000	50500000	582										chr18	48600000	50400000
chr18	49100000	49850000	591				chr18	49050000	49800000	chr18	49100000	49850000	chr18	49100000	49900000
chr18	53000000	54200000	608							chr18	53000000	54200000
chr18	54550000	55200000	587
chr18	55850000	56800000	616							chr18	55850000	56800000	chr18	55900000	56800000
chr18	57100000	58300000	600										chr18	57150000	58300000
chr18	57100000	59150000	585
chr18	59200000	59800000	610
chr18	59850000	61100000	605	chr18	59850000	61100000	chr18	59850000	61050000	chr18	59950000	61100000	chr18	59850000	61100000
chr18	63450000	64200000	631							chr18	63450000	64250000	chr18	63500000	64300000
chr18	64800000	66400000	622	chr18	64850000	66400000	chr18	64850000	66400000	chr18	64850000	66350000	chr18	64750000	66400000
chr18	66500000	68100000	624							chr18	66500000	68100000	chr18	66450000	68100000
chr18	68250000	70250000	617	chr18	68300000	70250000				chr18	68300000	70250000	chr18	68250000	70250000
chr18	70300000	71600000	602	chr18	70350000	71550000	chr18	70300000	71750000	chr18	70350000	71600000	chr18	70300000	71650000
chr18	71800000	74450000	581
chr18	72250000	73200000	607	chr18	72250000	73200000	chr18	72300000	73150000	chr18	72250000	73200000	chr18	72250000	73150000
chr18	74950000	77950000	592
chr18	75200000	76750000	603
chr19	4700000	5650000	660	chr19	4700000	5650000				chr19	4700000	5650000	chr19	4700000	5650000
chr19	5950000	6900000	655	chr19	5950000	6900000	chr19	5950000	6950000	chr19	5950000	6900000	chr19	5900000	6900000
chr19	5950000	7950000	641
chr19	8650000	9900000	645				chr19	8650000	9850000	chr19	8650000	9900000	chr19	8750000	9900000
chr19	11000000	11600000	669										chr19	11000000	11600000
chr19	11700000	12750000	640							chr19	11700000	12750000	chr19	11700000	12800000
chr19	13050000	14600000	653							chr19	13050000	14550000	chr19	13050000	14600000
chr19	14650000	17300000	636
chr19	14800000	16150000	644				chr19	14850000	16300000	chr19	14700000	16150000	chr19	14800000	16100000
chr19	16550000	17400000	666	chr19	16600000	17400000	chr19	16600000	17400000	chr19	16600000	17400000	chr19	16550000	17400000
chr19	17450000	18200000	663	chr19	17500000	18200000	chr19	17500000	18200000				chr19	17500000	18200000
chr19	18500000	19550000	656							chr19	18450000	19400000	chr19	18500000	19400000
chr19	19800000	22050000	657							chr19	19800000	22000000
chr19	23100000	24550000	650	chr19	23150000	24550000	chr19	23150000	24550000	chr19	23150000	24500000	chr19	23000000	24600000
chr19	27700000	29600000	649				chr19	27700000	29600000				chr19	27700000	29800000
chr19	31200000	32700000	652	chr19	31150000	32750000	chr19	31200000	32750000	chr19	31200000	32700000	chr19	31150000	32700000
chr19	32800000	33600000	665										chr19	32850000	33650000
chr19	32850000	35000000	642							chr19	33050000	34950000	chr19	32850000	34850000
chr19	33700000	34600000	667	chr19	33700000	34750000				chr19	33700000	34650000	chr19	33700000	34650000
chr19	35550000	36550000	647	chr19	35600000	36500000	chr19	35550000	36550000	chr19	35500000	36550000	chr19	35500000	36500000
chr19	36700000	37750000	634
chr19	36700000	38300000	648							chr19	36700000	38300000	chr19	36650000	38300000
chr19	39650000	42750000	635
chr19	43100000	43850000	646							chr19	43100000	43850000	chr19	43150000	43850000
chr19	44100000	45100000	651	chr19	44100000	45100000	chr19	44100000	45100000	chr19	44100000	45100000	chr19	44100000	45100000
chr19	45200000	45900000	662	chr19	45200000	45950000	chr19	45300000	46000000	chr19	45150000	45950000	chr19	45150000	45900000
chr19	46300000	47050000	664							chr19	46300000	47050000	chr19	46300000	47050000
chr19	49100000	50150000	668
chr19	50600000	52000000	654
chr19	52100000	59050000	639
chr19	52200000	54550000	643				chr19	52250000	54300000	chr19	52250000	54550000	chr19	52250000	54550000
chr19	52450000	53450000	661	chr19	52350000	53450000	chr19	52400000	53400000
chr19	54750000	56150000	637				chr19	54750000	56150000	chr19	54750000	56100000	chr19	54850000	56100000
chr19	56200000	56850000	659	chr19	56200000	56850000				chr19	56150000	56850000	chr19	56200000	56850000
chr19	56950000	57600000	658	chr19	56900000	57650000	chr19	56950000	57650000	chr19	56950000	57550000	chr19	56900000	57600000
chr19	57850000	59050000	638	chr19	57850000	59050000	chr19	57850000	59050000	chr19	57850000	59100000	chr19	57850000	59050000
chr2	850000	1750000	1149
chr2	6050000	6900000	1040	chr2	6100000	6900000	chr2	5950000	6900000	chr2	6100000	6900000	chr2	6100000	6900000
chr2	7200000	8900000	1087	chr2	7250000	8900000	chr2	7200000	8900000	chr2	7200000	8900000	chr2	7200000	8900000
chr2	9300000	10800000	1125	chr2	9500000	10850000	chr2	9500000	10800000
chr2	10900000	11750000	1074	chr2	10950000	11750000	chr2	10950000	11750000	chr2	10900000	11800000	chr2	10850000	11750000
chr2	11900000	13100000	1062	chr2	11900000	13100000	chr2	11900000	13100000	chr2	11900000	13100000	chr2	11900000	13100000
chr2	13200000	15000000	1115							chr2	13200000	15000000	chr2	13200000	15050000
chr2	15750000	16650000	1126	chr2	15750000	16650000	chr2	15750000	16700000	chr2	15750000	16650000
chr2	17600000	18400000	1138							chr2	17600000	18400000
chr2	18600000	20050000	1120	chr2	18600000	20050000	chr2	18600000	20050000	chr2	18600000	20000000	chr2	18550000	20050000
chr2	21250000	23300000	1015										chr2	21200000	23050000
chr2	24000000	26000000	1094
chr2	24350000	25300000	1027
chr2	27000000	27700000	1148
chr2	27900000	28700000	992	chr2	27900000	28700000	chr2	27850000	28700000	chr2	27900000	28700000	chr2	27900000	28700000
chr2	29450000	30250000	1019							chr2	29450000	30250000	chr2	29450000	30250000
chr2	30300000	31750000	1075							chr2	30300000	31750000	chr2	30300000	31750000
chr2	30950000	31700000	1044	chr2	30950000	31750000	chr2	30950000	31750000				chr2	30950000	31700000
chr2	31900000	32700000	1116							chr2	31850000	32600000	chr2	31900000	32700000
chr2	32900000	33800000	1073				chr2	32900000	33700000	chr2	32850000	33800000	chr2	32850000	33800000
chr2	33850000	36950000	988
chr2	34050000	35650000	1064	chr2	34050000	35650000	chr2	33900000	35700000	chr2	34100000	35600000	chr2	33850000	35600000
chr2	36100000	36950000	1133				chr2	36000000	36950000
chr2	37150000	39050000	1008							chr2	37300000	39000000	chr2	37250000	39000000
chr2	37350000	38150000	999	chr2	37400000	38150000	chr2	37400000	38150000	chr2	37350000	38150000
chr2	40000000	42000000	1028							chr2	40000000	42000000	chr2	40000000	42000000
chr2	40050000	40850000	1129	chr2	40100000	40850000	chr2	40100000	40800000	chr2	40050000	40850000	chr2	40050000	40900000
chr2	44000000	47150000	1007	chr2	43900000	47600000	chr2	43900000	47550000
chr2	44150000	45200000	1070
chr2	44150000	45750000	1104							chr2	44200000	45750000	chr2	44200000	45750000
chr2	45800000	47100000	1134							chr2	45800000	47100000	chr2	45900000	47100000
chr2	48800000	50700000	1101	chr2	48850000	50650000	chr2	48900000	50650000	chr2	48850000	50700000	chr2	48850000	50700000
chr2	49000000	49700000	1082
chr2	49800000	50650000	1136				chr2	49800000	50650000	chr2	49800000	50650000	chr2	49750000	50650000
chr2	50750000	53750000	1021	chr2	50850000	53900000				chr2	50850000	53800000	chr2	50750000	53850000
chr2	53950000	55800000	1067	chr2	54000000	55850000	chr2	54100000	55800000	chr2	54000000	55850000	chr2	54050000	55800000
chr2	54050000	55050000	1135							chr2	54100000	55050000	chr2	54100000	55050000
chr2	56250000	57700000	1026							chr2	56250000	57750000	chr2	56250000	57700000
chr2	56400000	57000000	1131
chr2	57800000	58700000	1038	chr2	57900000	58700000	chr2	57850000	58700000	chr2	57900000	58750000	chr2	57800000	58650000
chr2	58950000	60850000	1068										chr2	59150000	60850000
chr2	61400000	62050000	1106										chr2	61400000	62050000
chr2	62100000	63850000	1031							chr2	62100000	63800000	chr2	62100000	63800000
chr2	62650000	64150000	1041
chr2	64150000	65800000	1058
chr2	65850000	66550000	1142
chr2	65850000	68200000	1086							chr2	65850000	68250000	chr2	65850000	68200000
chr2	69550000	70500000	1091	chr2	69600000	70500000	chr2	69550000	70500000
chr2	71750000	72950000	1100							chr2	71750000	72950000	chr2	71700000	73050000
chr2	73800000	74800000	1098	chr2	73700000	74650000	chr2	73750000	74650000
chr2	74900000	75850000	1025	chr2	74850000	75850000				chr2	74900000	75850000	chr2	74850000	75850000
chr2	75950000	76900000	1048							chr2	75950000	76950000	chr2	75950000	76950000
chr2	77000000	79300000	1032							chr2	77050000	79250000	chr2	77050000	79350000
chr2	79400000	80150000	1099							chr2	79400000	80150000	chr2	79400000	80100000
chr2	80200000	84550000	1001	chr2	80250000	84550000				chr2	80200000	84550000
chr2	80250000	81150000	1124
chr2	80800000	84550000	995	chr2	80250000	84550000				chr2	80200000	84550000
chr2	81400000	82200000	1147										chr2	81350000	82200000
chr2	84650000	85500000	1030							chr2	84650000	85500000	chr2	84650000	85500000
chr2	85800000	86450000	1078
chr2	95850000	96550000	1002
chr2	96600000	97800000	1059
chr2	98150000	99750000	1003
chr2	98250000	99100000	990							chr2	98300000	99100000	chr2	98200000	99100000
chr2	100100000	101550000	1092							chr2	100100000	101550000	chr2	100100000	101550000
chr2	100150000	100950000	1107				chr2	100150000	100850000	chr2	100150000	100850000
chr2	101850000	103050000	1036							chr2	101850000	103100000	chr2	101900000	103200000
chr2	103450000	105550000	1119							chr2	103450000	105550000	chr2	103450000	105550000
chr2	105900000	107150000	1095	chr2	105950000	107100000	chr2	105900000	107150000				chr2	105950000	107150000
chr2	107200000	108750000	1090	chr2	107250000	108650000	chr2	107250000	108700000	chr2	107250000	108750000	chr2	107250000	108750000
chr2	112600000	113700000	1118
chr2	114750000	115500000	1143
chr2	115600000	118500000	1014	chr2	115450000	118500000							chr2	115850000	118500000
chr2	118750000	119950000	1077										chr2	118750000	120000000
chr2	120100000	122100000	1013
chr2	120350000	121050000	1065				chr2	120350000	121050000
chr2	121200000	122000000	1123							chr2	121100000	121950000
chr2	122700000	124200000	1108							chr2	122650000	124350000	chr2	122600000	124250000
chr2	124750000	127600000	1016							chr2	124750000	127700000	chr2	124750000	127700000
chr2	127850000	128950000	1132	chr2	127850000	128950000	chr2	127800000	128950000	chr2	127850000	128900000	chr2	127900000	128950000
chr2	129050000	130600000	1079							chr2	129050000	130600000
chr2	132600000	134550000	1017
chr2	134600000	135650000	1121							chr2	134600000	135650000	chr2	134600000	135650000
chr2	135700000	136500000	1005							chr2	135700000	136450000	chr2	135700000	136500000
chr2	137200000	139600000	991
chr2	137350000	138550000	1023							chr2	137200000	138550000	chr2	137200000	138550000
chr2	138600000	139550000	1024	chr2	138650000	139550000	chr2	138600000	139550000	chr2	138650000	139550000	chr2	138650000	139550000
chr2	141700000	142750000	1146
chr2	144150000	147400000	996	chr2	144000000	147300000
chr2	144200000	145500000	1128										chr2	144250000	145400000
chr2	145700000	146500000	1144										chr2	145700000	146600000
chr2	146600000	147350000	1088
chr2	147650000	148650000	1049	chr2	147650000	148650000	chr2	147650000	148650000	chr2	147600000	148650000	chr2	147650000	148650000
chr2	150450000	152050000	1089							chr2	150450000	152050000	chr2	150450000	152050000
chr2	152300000	153550000	1055							chr2	152350000	153550000	chr2	152300000	153550000
chr2	153650000	154450000	1042	chr2	153700000	154450000	chr2	153700000	154450000	chr2	153650000	154450000	chr2	153650000	154500000
chr2	155200000	156150000	1052				chr2	155250000	156150000	chr2	155250000	156150000	chr2	155250000	156150000
chr2	156200000	156800000	1096
chr2	156800000	158050000	1033	chr2	156800000	158050000	chr2	156850000	158050000
chr2	158850000	159650000	1057	chr2	158900000	159650000	chr2	158900000	159700000	chr2	158850000	159650000	chr2	158900000	159650000
chr2	159750000	160850000	1069							chr2	159750000	160800000	chr2	159700000	160850000
chr2	160950000	161900000	1037				chr2	160950000	161950000	chr2	160900000	161950000	chr2	160900000	162000000
chr2	162250000	163050000	1076							chr2	162250000	163000000
chr2	164000000	165400000	1085							chr2	164000000	165400000	chr2	164000000	165350000
chr2	165700000	167000000	1051							chr2	165650000	167000000	chr2	165600000	166950000
chr2	167200000	168950000	1018										chr2	167200000	168950000
chr2	167300000	168100000	1084							chr2	167300000	168050000	chr2	167350000	168050000
chr2	169050000	169750000	989	chr2	169050000	169750000	chr2	169000000	169750000	chr2	169050000	169750000	chr2	169000000	169750000
chr2	170250000	171750000	1081	chr2	170250000	171700000	chr2	170250000	171700000	chr2	170250000	171700000	chr2	170200000	171750000
chr2	173700000	175250000	1111							chr2	173600000	175200000	chr2	173800000	175250000
chr2	176200000	176900000	1139										chr2	176150000	176900000
chr2	179300000	180200000	1110				chr2	179300000	180300000				chr2	179350000	180250000
chr2	180800000	182900000	1035							chr2	180800000	182950000	chr2	180850000	182900000
chr2	180900000	181750000	1034							chr2	180900000	181800000	chr2	180900000	181850000
chr2	182950000	183950000	1080							chr2	183000000	183900000	chr2	183000000	183900000
chr2	184050000	186000000	1117							chr2	184100000	185900000	chr2	184050000	186150000
chr2	187600000	188400000	1046	chr2	187600000	188400000	chr2	187650000	188400000	chr2	187650000	188400000	chr2	187650000	188350000
chr2	188400000	190250000	1047
chr2	188600000	189300000	1137
chr2	189350000	190250000	1053							chr2	189350000	190250000	chr2	189350000	190250000
chr2	190500000	191800000	1114							chr2	190500000	191800000	chr2	190500000	191800000
chr2	194950000	196900000	1020										chr2	194750000	196900000
chr2	197700000	198950000	1061
chr2	199150000	200450000	1011				chr2	199150000	200450000	chr2	199200000	200400000	chr2	199150000	200450000
chr2	200700000	201500000	1050	chr2	200750000	201500000	chr2	200750000	201600000	chr2	200700000	201500000	chr2	200750000	201550000
chr2	203250000	204300000	1105	chr2	203200000	204300000	chr2	203300000	204300000	chr2	203300000	204300000	chr2	203300000	204300000
chr2	204950000	206750000	1102	chr2	204950000	206650000	chr2	204950000	206650000	chr2	204950000	206750000	chr2	204950000	206750000
chr2	206950000	208950000	1056							chr2	207000000	209000000	chr2	207000000	208950000
chr2	209200000	210100000	1043							chr2	209250000	210150000	chr2	209200000	210150000
chr2	209200000	211200000	1045
chr2	211350000	212000000	1141
chr2	212500000	213450000	1063							chr2	212450000	213450000	chr2	212400000	213450000
chr2	213450000	216600000	994	chr2	213500000	216800000	chr2	213450000	216800000	chr2	213500000	216850000	chr2	213500000	216800000
chr2	213500000	216850000	1006	chr2	213500000	216800000	chr2	213450000	216800000	chr2	213500000	216850000	chr2	213500000	216800000
chr2	213500000	216850000	1006	chr2	213500000	216800000	chr2	213450000	216800000	chr2	214000000	216850000	chr2	213500000	216800000
chr2	214100000	214850000	1112
chr2	214100000	216150000	993							chr2	214100000	216150000
chr2	215250000	216100000	1145
chr2	216150000	216850000	1000							chr2	216150000	216850000	chr2	216200000	216800000
chr2	217550000	218850000	997							chr2	217550000	218800000
chr2	219050000	220300000	1054							chr2	219000000	220250000	chr2	219000000	220200000
chr2	219100000	219700000	1113							chr2	219050000	219750000
chr2	220550000	222800000	1071							chr2	220550000	222800000	chr2	220550000	222800000
chr2	220600000	221400000	1122
chr2	221500000	222450000	1097
chr2	222900000	223500000	1109							chr2	222850000	223550000	chr2	222850000	223500000
chr2	223800000	224450000	1140							chr2	223800000	224500000	chr2	223800000	224450000
chr2	225900000	226500000	1083							chr2	225900000	226500000	chr2	225900000	226500000
chr2	226650000	227950000	1093	chr2	226500000	227950000	chr2	226550000	227950000	chr2	226550000	227950000	chr2	226550000	227950000
chr2	228000000	228700000	1103	chr2	228100000	228700000							chr2	228000000	228700000
chr2	228750000	230500000	1066	chr2	228750000	230450000	chr2	228750000	230300000	chr2	228750000	230450000	chr2	228750000	230450000
chr2	230600000	232300000	1039							chr2	230650000	232250000
chr2	230650000	231650000	1022				chr2	230650000	231700000	chr2	230650000	231700000	chr2	230650000	231650000
chr2	232600000	233350000	998							chr2	232600000	233350000	chr2	232600000	233350000
chr2	232600000	234450000	1010
chr2	233450000	234250000	1060							chr2	233450000	234200000	chr2	233450000	234350000
chr2	234650000	238350000	1029
chr2	234800000	236600000	1127	chr2	234850000	236600000				chr2	234800000	236600000
chr2	234800000	237100000	1072
chr2	237200000	237950000	1009	chr2	237200000	237950000	chr2	237200000	237950000	chr2	237150000	237950000	chr2	237200000	237950000
chr2	238500000	239200000	1130							chr2	238500000	239200000	chr2	238500000	239200000
chr2	239400000	241250000	1012										chr2	239450000	241350000
chr2	241900000	243050000	1004							chr2	241750000	243050000	chr2	241750000	243050000
chr20	1200000	2450000	845							chr20	1250000	2400000
chr20	5300000	6050000	813							chr20	5350000	6050000	chr20	5300000	6000000
chr20	6050000	8800000	817
chr20	6100000	7350000	825
chr20	7900000	8700000	819							chr20	7900000	8700000	chr20	7900000	8700000
chr20	9350000	10200000	846
chr20	10450000	11500000	829	chr20	10500000	11500000	chr20	10450000	11500000	chr20	10500000	11500000	chr20	10500000	11500000
chr20	11600000	12800000	839	chr20	11650000	12800000	chr20	11600000	12850000	chr20	11600000	12800000	chr20	11600000	12800000
chr20	12900000	14000000	843	chr20	12900000	14000000	chr20	12900000	14000000	chr20	12900000	13950000	chr20	12900000	14000000
chr20	14050000	16700000	826	chr20	14100000	16700000				chr20	14050000	16700000	chr20	14100000	16700000
chr20	14150000	15350000	828				chr20	14200000	15450000	chr20	14150000	15350000	chr20	14150000	15450000
chr20	15650000	16550000	831	chr20	15650000	16500000	chr20	15650000	16550000	chr20	15600000	16500000	chr20	15650000	16600000
chr20	16750000	17400000	824	chr20	16750000	17400000	chr20	16750000	17400000	chr20	16750000	17400000	chr20	16750000	17400000
chr20	17450000	18250000	818							chr20	17450000	18250000	chr20	17450000	18250000
chr20	18350000	19650000	841							chr20	18350000	19600000
chr20	20000000	20600000	835
chr20	20000000	21550000	830
chr20	20800000	21550000	823							chr20	20800000	21550000	chr20	20750000	21550000
chr20	23750000	24900000	844							chr20	23800000	24900000	chr20	23800000	24900000
chr20	30300000	31350000	820				chr20	30400000	31300000				chr20	30250000	31250000
chr20	32750000	33350000	842
chr20	35750000	37050000	838							chr20	35800000	37050000	chr20	35700000	37000000
chr20	37700000	39500000	827							chr20	37700000	39550000	chr20	37700000	39350000
chr20	37850000	38650000	837							chr20	37800000	38700000	chr20	37850000	38650000
chr20	40350000	41950000	832							chr20	40350000	42000000	chr20	40350000	41950000
chr20	46300000	47600000	816
chr20	49400000	50350000	840
chr20	51150000	51900000	836							chr20	51100000	51900000
chr20	53300000	54800000	821	chr20	53300000	54750000	chr20	53300000	54750000	chr20	53300000	54750000	chr20	53300000	54850000
chr20	55650000	58050000	815
chr20	56050000	56750000	822	chr20	56050000	56750000	chr20	56100000	56750000	chr20	55950000	56750000	chr20	56050000	56750000
chr20	58550000	60450000	834	chr20	58650000	60450000	chr20	58550000	60500000	chr20	58650000	60450000	chr20	58550000	60450000
chr20	60700000	61500000	833							chr20	60750000	61450000
chr20	60750000	62950000	814
chr21	15600000	17250000	847							chr21	15600000	17250000	chr21	15650000	17200000
chr21	17450000	18650000	857							chr21	17350000	18650000	chr21	17400000	18650000
chr21	18750000	19450000	860	chr21	18750000	19400000				chr21	18750000	19500000	chr21	18750000	19550000
chr21	19650000	22250000	861							chr21	19700000	22250000	chr21	19750000	22200000
chr21	20200000	21700000	862
chr21	22350000	24200000	863										chr21	22400000	24150000
chr21	27700000	30100000	851
chr21	31350000	32400000	858							chr21	31300000	32400000
chr21	34000000	34850000	854	chr21	34000000	34850000	chr21	34000000	34800000	chr21	34000000	34850000	chr21	34000000	34850000
chr21	35050000	35750000	852
chr21	36050000	37350000	856	chr21	36050000	37250000	chr21	36050000	37350000	chr21	36050000	37400000	chr21	36050000	37350000
chr21	36100000	36800000	859
chr21	39000000	40550000	849							chr21	39050000	40750000
chr21	39050000	39800000	855	chr21	39050000	39800000	chr21	39050000	39800000	chr21	39050000	39900000	chr21	39050000	39800000
chr21	39900000	40500000	850
chr21	40900000	42450000	853	chr21	40850000	42450000	chr21	40950000	42450000	chr21	40900000	42450000
chr21	44200000	45150000	848
chr22	18850000	19900000	865	chr22	18850000	19750000
chr22	24200000	24950000	887
chr22	25450000	26850000	882	chr22	25450000	26850000	chr22	25450000	26800000	chr22	25450000	26850000	chr22	25450000	26850000
chr22	25450000	28950000	866
chr22	27050000	28950000	870	chr22	27150000	28950000	chr22	27050000	29000000	chr22	27050000	28950000	chr22	27050000	28950000
chr22	27100000	28150000	886	chr22	27150000	28150000	chr22	27150000	28150000	chr22	27100000	28150000	chr22	27100000	28200000
chr22	28250000	28950000	885							chr22	28200000	28950000
chr22	29700000	31700000	883				chr22	29700000	31750000	chr22	29700000	31750000	chr22	29700000	31750000
chr22	29750000	30650000	876	chr22	29800000	30650000	chr22	29750000	30750000	chr22	29750000	30650000	chr22	29800000	30650000
chr22	30850000	31650000	889	chr22	30800000	31550000	chr22	30850000	31550000	chr22	30950000	31650000	chr22	30800000	31650000
chr22	33400000	35600000	873	chr22	33500000	35600000
chr22	35700000	36600000	874							chr22	35650000	36600000	chr22	35700000	36600000
chr22	36900000	37850000	888	chr22	36900000	37900000				chr22	36900000	37950000	chr22	36900000	37850000
chr22	38000000	42000000	864
chr22	38200000	39050000	871				chr22	38100000	39050000	chr22	38200000	39050000	chr22	38100000	39050000
chr22	39100000	39700000	884							chr22	39100000	39700000
chr22	39100000	41750000	880							chr22	39100000	41650000
chr22	39900000	40700000	869							chr22	39900000	40700000	chr22	39850000	40700000
chr22	42050000	42950000	881	chr22	42050000	42950000	chr22	42050000	42950000	chr22	42050000	42950000	chr22	42050000	42950000
chr22	43550000	46600000	868
chr22	43600000	44250000	877	chr22	43600000	44300000	chr22	43600000	44300000	chr22	43600000	44300000	chr22	43600000	44300000
chr22	43600000	45100000	878	chr22	43600000	45100000	chr22	43750000	45050000	chr22	43600000	45150000	chr22	43600000	45150000
chr22	44350000	45050000	875				chr22	44350000	45050000				chr22	44350000	45050000
chr22	47500000	50100000	867										chr22	47450000	50100000
chr22	47600000	48850000	879	chr22	47600000	48900000	chr22	47600000	48900000	chr22	47600000	48900000	chr22	47550000	48900000
chr22	48950000	49850000	872
chr3	2200000	3050000	1258	chr3	2150000	3050000	chr3	2200000	3000000	chr3	2200000	3050000	chr3	2200000	3050000
chr3	3200000	4300000	1194	chr3	3250000	4300000	chr3	3250000	4250000	chr3	3200000	4300000	chr3	3250000	4250000
chr3	4350000	5200000	1209	chr3	4350000	5200000	chr3	4350000	5200000	chr3	4350000	5200000	chr3	4350000	5200000
chr3	5250000	8400000	1219				chr3	5250000	8350000	chr3	5250000	8400000	chr3	5250000	8400000
chr3	7000000	8000000	1245				chr3	7000000	8000000
chr3	10400000	11050000	1268
chr3	10400000	12550000	1210										chr3	10400000	12550000
chr3	10450000	12050000	1191				chr3	10400000	12100000
chr3	11250000	11850000	1248	chr3	11250000	11850000	chr3	11200000	11900000				chr3	11200000	11850000
chr3	11950000	12550000	1272
chr3	14200000	14950000	1254										chr3	14200000	14950000
chr3	19050000	19900000	1263							chr3	19100000	19950000	chr3	19100000	19900000
chr3	20350000	21900000	1269	chr3	20350000	22050000	chr3	20400000	22050000	chr3	20350000	21950000	chr3	20350000	22050000
chr3	22950000	24000000	1182	chr3	23000000	24000000	chr3	23000000	24000000	chr3	22950000	23950000	chr3	23000000	23950000
chr3	26050000	27050000	1253										chr3	26000000	27100000
chr3	28700000	30000000	1236							chr3	28700000	30000000	chr3	28650000	29950000
chr3	30050000	30750000	1256							chr3	30100000	30750000	chr3	30050000	30750000
chr3	30800000	31850000	1240							chr3	30800000	31800000	chr3	30800000	31800000
chr3	33900000	34700000	1244							chr3	33850000	34750000	chr3	33900000	34750000
chr3	33900000	36800000	1224							chr3	33850000	36750000	chr3	33900000	36750000
chr3	35950000	36750000	1267							chr3	36000000	36750000	chr3	36000000	36750000
chr3	37300000	39300000	1237
chr3	39500000	40300000	1208							chr3	39500000	40300000	chr3	39500000	40300000
chr3	40350000	41900000	1216	chr3	40350000	41950000	chr3	40450000	41900000	chr3	40400000	41900000	chr3	40350000	41900000
chr3	40550000	41350000	1261							chr3	40600000	41300000	chr3	40600000	41300000
chr3	42800000	44950000	1259
chr3	42850000	44350000	1260							chr3	42900000	44400000
chr3	43700000	44300000	1203				chr3	43650000	44350000				chr3	43600000	44300000
chr3	44350000	44950000	1243
chr3	45750000	46450000	1291										chr3	45750000	46450000
chr3	46700000	47400000	1262							chr3	46700000	47400000	chr3	46700000	47400000
chr3	47450000	48200000	1294				chr3	47450000	48150000	chr3	47500000	48200000	chr3	47450000	48250000
chr3	47450000	50050000	1187
chr3	50400000	51400000	1173							chr3	50550000	51400000
chr3	50400000	51900000	1202
chr3	53300000	53900000	1188							chr3	53300000	53950000	chr3	53300000	53900000
chr3	53950000	56500000	1165							chr3	54300000	56500000	chr3	54300000	56500000
chr3	54700000	56500000	1160
chr3	55350000	56350000	1175	chr3	55300000	56300000
chr3	56600000	58100000	1221				chr3	56600000	57900000	chr3	56600000	57900000	chr3	56600000	58050000
chr3	58550000	62200000	1225							chr3	58550000	62150000	chr3	58550000	62150000
chr3	58600000	59850000	1265	chr3	58600000	59900000				chr3	58600000	59850000
chr3	59150000	59850000	1270				chr3	59100000	59900000	chr3	59150000	59850000	chr3	59100000	59850000
chr3	60050000	61350000	1289							chr3	60100000	61350000	chr3	60150000	61400000
chr3	61400000	62200000	1249	chr3	61450000	62200000	chr3	61450000	62200000	chr3	61400000	62200000	chr3	61400000	62200000
chr3	62350000	63800000	1251	chr3	62550000	63850000	chr3	62550000	63800000	chr3	62550000	63800000	chr3	62550000	63800000
chr3	62500000	63250000	1200							chr3	62550000	63250000	chr3	62550000	63250000
chr3	64500000	65700000	1229	chr3	64500000	65700000	chr3	64500000	65650000	chr3	64500000	65700000	chr3	64500000	65700000
chr3	66250000	66900000	1153	chr3	66250000	66950000	chr3	66250000	66950000	chr3	66250000	66900000	chr3	66250000	66900000
chr3	66950000	68950000	1185							chr3	66950000	68950000	chr3	66950000	68950000
chr3	66950000	70000000	1157
chr3	67100000	67900000	1257	chr3	67050000	67900000				chr3	67000000	67900000	chr3	67100000	67950000
chr3	68100000	68900000	1232							chr3	68100000	68900000
chr3	69150000	69950000	1199							chr3	69100000	69850000
chr3	70050000	71700000	1218				chr3	70200000	71700000	chr3	70050000	71700000	chr3	70050000	71700000
chr3	70850000	71700000	1217							chr3	70900000	71700000
chr3	71750000	73050000	1168							chr3	71750000	73100000	chr3	71750000	73100000
chr3	73700000	75600000	1193
chr3	76700000	77350000	1295
chr3	77400000	79400000	1247							chr3	77300000	79400000	chr3	77350000	79400000
chr3	79550000	81250000	1222							chr3	79550000	81200000	chr3	79550000	81250000
chr3	81400000	82400000	1228							chr3	81450000	82500000	chr3	81500000	82450000
chr3	81400000	83650000	1190							chr3	81350000	83600000	chr3	81400000	83550000
chr3	82600000	83500000	1287
chr3	84450000	85650000	1276	chr3	84550000	85600000	chr3	84550000	85600000	chr3	84500000	85650000	chr3	84500000	85600000
chr3	85800000	86650000	1274							chr3	85800000	86600000	chr3	85750000	86650000
chr3	87250000	90350000	1158										chr3	87250000	90350000
chr3	87300000	88200000	1212							chr3	87300000	88200000	chr3	87250000	88150000
chr3	88250000	89150000	1284										chr3	88250000	89050000
chr3	93550000	96600000	1214							chr3	93600000	96550000	chr3	93550000	96550000
chr3	93650000	95850000	1186							chr3	93850000	95800000	chr3	93650000	95950000
chr3	94700000	95500000	1264	chr3	94750000	95450000	chr3	94750000	95450000
chr3	95700000	96500000	1292							chr3	95750000	96550000
chr3	96550000	97400000	1283
chr3	97500000	98500000	1281
chr3	97500000	99500000	1235							chr3	97650000	99450000
chr3	98650000	99450000	1195							chr3	98750000	99450000	chr3	98700000	99450000
chr3	100450000	101350000	1280	chr3	100450000	101350000	chr3	100450000	101350000	chr3	100550000	101350000	chr3	100450000	101350000
chr3	102300000	103450000	1233							chr3	102350000	103350000
chr3	103800000	105050000	1181	chr3	103850000	105050000				chr3	103800000	105150000	chr3	103800000	105050000
chr3	105350000	106300000	1155							chr3	105350000	106300000	chr3	105300000	106300000
chr3	106900000	108300000	1207							chr3	106900000	108300000	chr3	106900000	108300000
chr3	107500000	108250000	1230
chr3	108850000	111250000	1206							chr3	108850000	111300000	chr3	108850000	111300000
chr3	109000000	110000000	1293
chr3	110050000	111250000	1271										chr3	110100000	111200000
chr3	114050000	115550000	1255							chr3	113850000	115550000	chr3	113850000	115550000
chr3	115600000	116350000	1246							chr3	115600000	116350000	chr3	115600000	116350000
chr3	115600000	118900000	1162
chr3	116450000	117500000	1279	chr3	116500000	117400000				chr3	116450000	117400000	chr3	116450000	117450000
chr3	117700000	118550000	1288				chr3	117600000	118550000	chr3	117650000	118550000	chr3	117650000	118550000
chr3	121150000	122950000	1169							chr3	121200000	122950000	chr3	121200000	122950000
chr3	121200000	122400000	1166	chr3	121200000	122350000	chr3	121200000	122400000
chr3	123350000	124250000	1273							chr3	123350000	124250000	chr3	123350000	124250000
chr3	124450000	125300000	1174							chr3	124450000	125300000	chr3	124450000	125300000
chr3	125500000	128300000	1177
chr3	125650000	127250000	1163							chr3	125500000	127250000	chr3	125600000	127250000
chr3	126250000	127200000	1204	chr3	126300000	127250000	chr3	126300000	127250000	chr3	126200000	127250000	chr3	126250000	127250000
chr3	129850000	132100000	1197							chr3	129850000	132100000	chr3	129850000	132100000
chr3	130700000	131900000	1238							chr3	130750000	131900000	chr3	130700000	131950000
chr3	132350000	133650000	1184							chr3	132400000	133550000	chr3	132350000	133500000
chr3	134250000	135600000	1179							chr3	134250000	135600000	chr3	134250000	135600000
chr3	135650000	137850000	1161							chr3	135700000	137850000	chr3	135700000	137850000
chr3	135750000	136700000	1171	chr3	135750000	136700000	chr3	135750000	136700000	chr3	135750000	136700000	chr3	135750000	136700000
chr3	136800000	137750000	1189				chr3	136800000	137750000	chr3	136800000	137750000	chr3	136800000	137750000
chr3	137900000	139050000	1250				chr3	137900000	139050000	chr3	137900000	139050000	chr3	137950000	139050000
chr3	139100000	140850000	1266							chr3	139100000	140850000	chr3	139100000	140600000
chr3	142750000	143400000	1167							chr3	142750000	143450000	chr3	142750000	143450000
chr3	143550000	144300000	1282							chr3	143550000	144350000	chr3	143600000	144350000
chr3	147000000	148600000	1176							chr3	146900000	148600000
chr3	149000000	150600000	1201							chr3	149050000	150550000	chr3	149050000	150550000
chr3	152650000	153750000	1241				chr3	152550000	153750000	chr3	152650000	153700000	chr3	152700000	153700000
chr3	154050000	155400000	1278							chr3	154050000	155400000	chr3	154000000	155400000
chr3	155650000	156950000	1223							chr3	155650000	156900000	chr3	155550000	156950000
chr3	156250000	156900000	1151
chr3	157250000	158350000	1159							chr3	157250000	158350000
chr3	158500000	159500000	1231	chr3	158550000	159500000	chr3	158550000	159500000	chr3	158550000	159500000	chr3	158500000	159500000
chr3	159550000	160200000	1178				chr3	159550000	160150000	chr3	159550000	160200000	chr3	159550000	160200000
chr3	160250000	161150000	1277							chr3	160250000	161150000	chr3	160250000	161150000
chr3	161200000	164900000	1152				chr3	161150000	164900000				chr3	161200000	164900000
chr3	161550000	162750000	1234
chr3	163850000	164850000	1290
chr3	164950000	167050000	1227							chr3	164950000	167000000	chr3	164950000	167050000
chr3	167050000	167650000	1285
chr3	167750000	168550000	1242				chr3	167800000	168550000	chr3	167750000	168550000	chr3	167750000	168550000
chr3	168650000	169400000	1220							chr3	168650000	169400000	chr3	168650000	169400000
chr3	169450000	170550000	1213							chr3	169500000	170550000
chr3	169500000	172450000	1164
chr3	170600000	172450000	1239				chr3	170650000	172400000	chr3	170600000	172450000	chr3	170600000	172450000
chr3	171400000	172100000	1252
chr3	174700000	175650000	1286							chr3	174750000	175650000	chr3	174650000	175650000
chr3	176600000	177500000	1183										chr3	176650000	177500000
chr3	178100000	179250000	1215
chr3	179650000	180300000	1156
chr3	180800000	182400000	1180										chr3	180900000	182400000
chr3	182500000	183550000	1275
chr3	185550000	186450000	1192	chr3	185550000	186450000				chr3	185550000	186500000	chr3	185550000	186450000
chr3	187400000	188750000	1211	chr3	187400000	188700000				chr3	187400000	188700000	chr3	187400000	188650000
chr3	188900000	190200000	1196				chr3	188900000	190200000	chr3	188900000	190250000	chr3	188900000	190250000
chr3	190500000	193300000	1154
chr3	190550000	192150000	1198	chr3	190550000	192150000	chr3	190500000	192150000	chr3	190550000	192150000	chr3	190500000	192150000
chr3	192200000	193250000	1226	chr3	192250000	193250000	chr3	192200000	193250000	chr3	192200000	193250000	chr3	192200000	193250000
chr3	193350000	194100000	1150	chr3	193350000	194100000	chr3	193350000	194100000	chr3	193350000	194100000	chr3	193350000	194100000
chr3	193350000	195300000	1172
chr3	194250000	195250000	1205				chr3	194200000	195300000				chr3	194300000	195250000
chr3	195650000	197800000	1170
chr4	1800000	3200000	1368
chr4	3450000	4200000	1412
chr4	4350000	5950000	1324	chr4	4350000	5950000							chr4	4350000	5900000
chr4	7100000	8050000	1383	chr4	7100000	8150000	chr4	7100000	8100000	chr4	7150000	8000000
chr4	8650000	9450000	1297
chr4	10550000	11450000	1333	chr4	10550000	11450000	chr4	10550000	11450000	chr4	10500000	11500000
chr4	11700000	12600000	1388							chr4	11750000	12600000	chr4	11750000	12650000
chr4	12700000	13550000	1353							chr4	12700000	13550000	chr4	12700000	13550000
chr4	13600000	15150000	1361							chr4	13600000	15150000	chr4	13600000	15200000
chr4	16300000	17450000	1389	chr4	16300000	17450000				chr4	16300000	17450000	chr4	16300000	17450000
chr4	16800000	17450000	1403
chr4	17500000	18600000	1370	chr4	17550000	18550000	chr4	17550000	18600000	chr4	17550000	18600000	chr4	17550000	18550000
chr4	18700000	20200000	1386							chr4	18650000	20250000	chr4	18650000	20250000
chr4	20750000	21500000	1414				chr4	20750000	21600000	chr4	20650000	21450000	chr4	20750000	21550000
chr4	21750000	22850000	1385	chr4	21750000	22850000	chr4	21750000	22800000	chr4	21700000	22800000	chr4	21750000	22850000
chr4	22900000	24400000	1394							chr4	22950000	24400000	chr4	22900000	24400000
chr4	23050000	23750000	1415										chr4	22950000	23750000
chr4	24450000	25350000	1395										chr4	24450000	25250000
chr4	25900000	27100000	1349				chr4	25950000	27100000	chr4	25850000	27050000	chr4	25800000	27000000
chr4	27400000	30200000	1330
chr4	29200000	30100000	1420
chr4	36250000	37400000	1334	chr4	36200000	37400000	chr4	36200000	37400000	chr4	36200000	37400000	chr4	36350000	37400000
chr4	38050000	39150000	1307
chr4	40050000	40800000	1413				chr4	40050000	40850000	chr4	40050000	40850000	chr4	40050000	40850000
chr4	41200000	41850000	1372										chr4	41250000	41900000
chr4	42950000	44600000	1392							chr4	42950000	44550000	chr4	43000000	44600000
chr4	44700000	46650000	1352							chr4	44700000	46750000	chr4	44700000	46650000
chr4	46850000	47950000	1406							chr4	46850000	47950000	chr4	46850000	47950000
chr4	52650000	55150000	1373							chr4	52650000	55150000	chr4	52650000	55150000
chr4	53200000	53800000	1363										chr4	53200000	53800000
chr4	53850000	55100000	1371	chr4	53850000	55100000	chr4	53850000	55100000	chr4	53850000	55100000	chr4	53850000	55100000
chr4	55150000	55950000	1405
chr4	58000000	61150000	1321							chr4	58000000	61100000	chr4	58100000	61100000
chr4	58250000	59050000	1354
chr4	60100000	61050000	1398	chr4	60050000	61050000	chr4	60050000	61050000	chr4	60100000	61050000	chr4	60050000	61050000
chr4	61500000	63600000	1359							chr4	61500000	63600000	chr4	61500000	63550000
chr4	65500000	68200000	1313							chr4	65550000	68200000	chr4	65550000	68200000
chr4	69400000	70050000	1300
chr4	70500000	71400000	1387							chr4	70500000	71400000	chr4	70500000	71400000
chr4	74100000	75000000	1408							chr4	74100000	75000000	chr4	74100000	75000000
chr4	75700000	76400000	1312	chr4	75700000	76450000				chr4	75700000	76400000	chr4	75700000	76400000
chr4	77050000	78200000	1402							chr4	77050000	78150000	chr4	77000000	78100000
chr4	78800000	79800000	1329							chr4	78800000	79800000	chr4	78800000	79800000
chr4	79850000	80550000	1341
chr4	81250000	82050000	1308							chr4	81250000	82000000	chr4	81250000	82000000
chr4	82250000	83200000	1310							chr4	82200000	83200000	chr4	82250000	83150000
chr4	84550000	85450000	1309							chr4	84550000	85450000	chr4	84550000	85500000
chr4	86000000	87000000	1326	chr4	86000000	86950000	chr4	85950000	87000000	chr4	86000000	86950000	chr4	86000000	87000000
chr4	87300000	88150000	1314							chr4	87250000	88150000	chr4	87250000	88150000
chr4	90150000	91150000	1411
chr4	91200000	93300000	1336							chr4	91250000	93250000	chr4	91250000	93200000
chr4	91300000	92700000	1365
chr4	93600000	95050000	1399
chr4	95800000	98950000	1304
chr4	96050000	97000000	1377							chr4	96050000	97050000	chr4	96050000	97100000
chr4	97350000	98900000	1382										chr4	97550000	98900000
chr4	99050000	100700000	1323							chr4	99000000	100700000
chr4	100900000	103150000	1340							chr4	101000000	103200000	chr4	101000000	103200000
chr4	101750000	102900000	1380				chr4	101750000	102850000	chr4	101800000	102950000
chr4	103200000	104050000	1299							chr4	103200000	104050000	chr4	103200000	104050000
chr4	104100000	104850000	1306							chr4	104100000	104800000	chr4	104100000	104800000
chr4	104900000	105750000	1343	chr4	104900000	105750000	chr4	104900000	105750000	chr4	104900000	105750000	chr4	104900000	105750000
chr4	104900000	106700000	1337							chr4	104850000	106650000	chr4	104850000	106650000
chr4	108850000	109500000	1305							chr4	108850000	109550000	chr4	108850000	109550000
chr4	109600000	110250000	1379
chr4	111500000	112800000	1360							chr4	111500000	112800000	chr4	111500000	112900000
chr4	112950000	113900000	1366				chr4	112950000	113950000	chr4	113000000	113850000	chr4	113000000	113950000
chr4	114100000	115600000	1301							chr4	114150000	115600000	chr4	114000000	115600000
chr4	114200000	115000000	1322	chr4	114150000	115050000	chr4	114200000	114950000	chr4	114200000	115100000	chr4	114200000	115000000
chr4	115900000	117050000	1367	chr4	115950000	117050000	chr4	115950000	117100000	chr4	115950000	117050000	chr4	115900000	117050000
chr4	117100000	119150000	1356										chr4	117100000	119150000
chr4	117750000	119150000	1375										chr4	117700000	119150000
chr4	121000000	122000000	1364	chr4	121000000	122050000	chr4	121000000	122050000	chr4	121050000	122000000	chr4	121000000	122000000
chr4	122700000	123850000	1376				chr4	122750000	123800000	chr4	122750000	123850000	chr4	122750000	123850000
chr4	123900000	124650000	1390	chr4	123900000	124600000	chr4	123950000	124600000	chr4	123900000	124600000
chr4	123950000	125200000	1378							chr4	123950000	125150000	chr4	123950000	125150000
chr4	125250000	128450000	1296
chr4	125300000	126150000	1400				chr4	125250000	126150000	chr4	125250000	126150000	chr4	125300000	126150000
chr4	126200000	127300000	1409							chr4	126200000	127300000	chr4	126250000	127300000
chr4	126200000	128450000	1320							chr4	126200000	128450000	chr4	126200000	128450000
chr4	127400000	128400000	1339							chr4	127450000	128400000	chr4	127400000	128400000
chr4	129050000	130050000	1369							chr4	129050000	130050000	chr4	129000000	130050000
chr4	130250000	131650000	1397							chr4	130350000	131750000
chr4	131900000	133600000	1362							chr4	131900000	133550000	chr4	131900000	133650000
chr4	137000000	137900000	1358							chr4	136850000	137850000
chr4	138000000	138800000	1384
chr4	138000000	139850000	1327							chr4	138050000	139850000	chr4	138000000	139800000
chr4	138900000	139850000	1342	chr4	138850000	139750000	chr4	138850000	139800000	chr4	138850000	139850000	chr4	138850000	139800000
chr4	140400000	141800000	1374							chr4	140400000	141750000	chr4	140400000	141800000
chr4	140500000	141200000	1345							chr4	140500000	141200000	chr4	140500000	141200000
chr4	141950000	143950000	1317										chr4	142000000	143950000
chr4	142050000	142950000	1344
chr4	143000000	143750000	1347							chr4	143000000	143800000	chr4	143000000	143750000
chr4	145050000	145950000	1355							chr4	145050000	145950000	chr4	145050000	145950000
chr4	151150000	151950000	1325	chr4	151150000	151950000	chr4	151150000	151950000	chr4	151150000	151950000	chr4	151150000	151950000
chr4	152000000	153300000	1393							chr4	152050000	153300000
chr4	152000000	154000000	1319
chr4	152000000	154650000	1302							chr4	152000000	154650000	chr4	152050000	154650000
chr4	155650000	156250000	1351
chr4	156850000	158000000	1407				chr4	156900000	157900000	chr4	156850000	157950000	chr4	156750000	157950000
chr4	158050000	158950000	1401							chr4	158050000	159000000	chr4	158100000	159000000
chr4	160550000	161800000	1332							chr4	160500000	161900000	chr4	160600000	161800000
chr4	162100000	163100000	1346							chr4	162100000	163100000	chr4	162150000	163050000
chr4	163350000	164250000	1348							chr4	163300000	164200000	chr4	163350000	164200000
chr4	167050000	168000000	1338							chr4	167050000	168000000
chr4	167050000	169000000	1311							chr4	167050000	169000000
chr4	168250000	169000000	1416
chr4	169100000	170600000	1331							chr4	169100000	170500000	chr4	169050000	170500000
chr4	171000000	173000000	1318										chr4	171000000	173100000
chr4	171000000	173750000	1298
chr4	171050000	171850000	1316							chr4	171050000	171850000	chr4	171050000	171900000
chr4	172000000	172900000	1391							chr4	172100000	173000000	chr4	172050000	172950000
chr4	175550000	176550000	1396							chr4	175600000	176500000
chr4	177300000	177950000	1419										chr4	177250000	178000000
chr4	178350000	181500000	1303
chr4	178400000	179300000	1410							chr4	178350000	179200000
chr4	179450000	180700000	1381
chr4	180800000	181600000	1418	chr4	180750000	181550000							chr4	180800000	181550000
chr4	181700000	184150000	1350				chr4	181900000	184200000	chr4	181800000	184200000	chr4	181950000	184200000
chr4	182000000	183350000	1335
chr4	182500000	183250000	1417				chr4	182450000	183300000				chr4	182450000	183300000
chr4	184350000	185050000	1357										chr4	184350000	185050000
chr4	184350000	186350000	1315	chr4	184350000	186350000	chr4	184350000	186350000	chr4	184350000	186200000	chr4	184350000	186100000
chr4	186450000	187050000	1328							chr4	186350000	187050000
chr4	187200000	190900000	1404	chr4	187200000	190900000	chr4	187200000	190900000	chr4	187150000	191000000	chr4	187200000	190950000
chr5	2100000	4800000	1441
chr5	5400000	6700000	1463	chr5	5400000	6700000	chr5	5400000	6700000	chr5	5450000	6700000	chr5	5450000	6650000
chr5	6800000	7800000	1513	chr5	6900000	7800000	chr5	6900000	7800000	chr5	6800000	7850000	chr5	6800000	7800000
chr5	7900000	9250000	1523	chr5	7900000	9250000	chr5	7900000	9200000
chr5	11750000	13500000	1454							chr5	11700000	13550000	chr5	11850000	13500000
chr5	13900000	15000000	1449	chr5	13950000	15000000	chr5	13900000	14950000	chr5	13900000	14950000	chr5	13900000	15000000
chr5	15050000	16500000	1484							chr5	15100000	16400000	chr5	15100000	16350000
chr5	17200000	18300000	1478							chr5	17200000	18300000
chr5	18350000	18950000	1499
chr5	18350000	21800000	1422
chr5	24600000	26700000	1502							chr5	24600000	26600000	chr5	24600000	26600000
chr5	27000000	27850000	1533							chr5	27000000	27850000	chr5	27000000	27900000
chr5	29950000	31250000	1515
chr5	31400000	32100000	1460				chr5	31400000	32150000				chr5	31400000	32100000
chr5	32650000	33350000	1467							chr5	32650000	33350000	chr5	32650000	33350000
chr5	34950000	35900000	1446	chr5	35000000	35900000	chr5	35050000	35900000	chr5	34950000	35900000	chr5	34950000	35900000
chr5	36000000	36650000	1519	chr5	35950000	36700000				chr5	35950000	36650000	chr5	35950000	36650000
chr5	38300000	38900000	1503
chr5	39550000	40800000	1461							chr5	39550000	40800000	chr5	39550000	40850000
chr5	41550000	42850000	1512							chr5	41600000	42850000
chr5	42150000	42800000	1520
chr5	42900000	43600000	1434				chr5	42900000	43600000	chr5	42900000	43600000	chr5	42900000	43600000
chr5	43700000	44450000	1456							chr5	43650000	44450000	chr5	43650000	44450000
chr5	44900000	46350000	1459										chr5	44850000	46350000
chr5	50200000	51950000	1447							chr5	50200000	51950000	chr5	50200000	51950000
chr5	52400000	53550000	1492	chr5	52450000	53550000	chr5	52450000	53550000	chr5	52450000	53500000	chr5	52400000	53500000
chr5	53750000	54400000	1495							chr5	53750000	54400000	chr5	53650000	54400000
chr5	54500000	56500000	1457							chr5	54500000	56500000
chr5	55000000	56500000	1450							chr5	55000000	56500000	chr5	54950000	56500000
chr5	56600000	58200000	1471	chr5	56600000	58150000	chr5	56600000	58100000	chr5	56600000	58200000	chr5	56600000	58100000
chr5	60200000	61200000	1498							chr5	60200000	61200000	chr5	60200000	61200000
chr5	62450000	63300000	1505	chr5	62350000	63250000
chr5	63350000	63950000	1474
chr5	64000000	65450000	1428
chr5	64050000	64800000	1426							chr5	64050000	64850000	chr5	64050000	64850000
chr5	65550000	66350000	1464							chr5	65500000	66350000	chr5	65550000	66350000
chr5	66500000	67500000	1510	chr5	66400000	67500000	chr5	66400000	67500000	chr5	66500000	67500000
chr5	67550000	68250000	1477	chr5	67550000	68250000	chr5	67550000	68250000	chr5	67550000	68250000	chr5	67600000	68250000
chr5	73100000	73950000	1433	chr5	73100000	73950000	chr5	73100000	73950000	chr5	73150000	73950000	chr5	73100000	73950000
chr5	74300000	75600000	1483
chr5	76800000	77550000	1511							chr5	76750000	77550000	chr5	76800000	77550000
chr5	77600000	78250000	1491	chr5	77600000	78300000				chr5	77600000	78250000
chr5	79750000	80550000	1479							chr5	79750000	80500000
chr5	80650000	81550000	1424							chr5	80600000	81500000	chr5	80650000	81500000
chr5	82050000	82850000	1435
chr5	82950000	84350000	1509							chr5	83000000	84400000	chr5	82950000	84300000
chr5	87200000	87950000	1427							chr5	87150000	87950000
chr5	88000000	89650000	1486							chr5	88000000	89650000	chr5	88000000	89650000
chr5	90100000	90750000	1430							chr5	90100000	90750000	chr5	90100000	90750000
chr5	90750000	92850000	1473							chr5	90800000	92850000	chr5	90750000	92850000
chr5	94950000	96000000	1468							chr5	94950000	96000000	chr5	94950000	96050000
chr5	96550000	98150000	1475							chr5	96500000	98150000	chr5	96550000	98150000
chr5	98450000	99550000	1455										chr5	98450000	99500000
chr5	99750000	100700000	1439	chr5	99750000	100700000
chr5	101850000	102800000	1500	chr5	101850000	102850000	chr5	101850000	102800000	chr5	101850000	102800000
chr5	102900000	103600000	1469							chr5	102900000	103600000	chr5	102850000	103600000
chr5	105500000	106250000	1529	chr5	105450000	106250000				chr5	105450000	106250000
chr5	106350000	107000000	1528
chr5	107800000	108800000	1448	chr5	107800000	108800000				chr5	107800000	108800000	chr5	107750000	108800000
chr5	110400000	111600000	1421	chr5	110450000	111500000
chr5	110450000	112250000	1432										chr5	110450000	112150000
chr5	112350000	114450000	1431							chr5	112350000	114550000
chr5	112950000	114350000	1472	chr5	112950000	114350000	chr5	112950000	114350000	chr5	112950000	114450000	chr5	112950000	114400000
chr5	114600000	115400000	1496	chr5	114600000	115400000	chr5	114600000	115400000	chr5	114600000	115350000	chr5	114600000	115400000
chr5	115450000	116450000	1507	chr5	115450000	116450000	chr5	115450000	116450000	chr5	115450000	116350000	chr5	115400000	116500000
chr5	116750000	118150000	1489							chr5	116750000	118100000	chr5	116700000	118100000
chr5	119150000	119900000	1514							chr5	119100000	119900000	chr5	119100000	119900000
chr5	120100000	121250000	1524							chr5	120100000	121250000
chr5	121650000	122950000	1490							chr5	121650000	122900000	chr5	121700000	122900000
chr5	123000000	123700000	1527
chr5	123000000	125400000	1465	chr5	122950000	125500000	chr5	123000000	125500000	chr5	122950000	125550000	chr5	122950000	125500000
chr5	123750000	124750000	1530
chr5	125650000	126800000	1470				chr5	125650000	126800000
chr5	126850000	127500000	1451	chr5	126900000	127500000	chr5	126850000	127500000	chr5	126850000	127500000	chr5	126850000	127500000
chr5	129250000	130400000	1481							chr5	129300000	130400000
chr5	130750000	131550000	1476	chr5	130800000	131500000							chr5	130800000	131500000
chr5	131600000	132350000	1494	chr5	131600000	132350000	chr5	131600000	132350000	chr5	131600000	132250000	chr5	131600000	132350000
chr5	132450000	133250000	1466	chr5	132400000	133250000	chr5	132400000	133250000	chr5	132400000	133250000	chr5	132400000	133250000
chr5	133350000	134200000	1458							chr5	133350000	134150000	chr5	133350000	134150000
chr5	134550000	136900000	1453										chr5	134700000	136900000
chr5	137100000	138700000	1443
chr5	137200000	139550000	1425
chr5	137900000	138700000	1437							chr5	137900000	138650000	chr5	137900000	138700000
chr5	140100000	140900000	1423							chr5	140100000	140900000	chr5	140150000	140900000
chr5	141050000	142050000	1438							chr5	141050000	142100000	chr5	141050000	142050000
chr5	142250000	143350000	1440	chr5	142300000	143500000				chr5	142250000	143350000	chr5	142250000	143500000
chr5	143600000	145000000	1480	chr5	143600000	144850000	chr5	143600000	144850000	chr5	143600000	145000000	chr5	143600000	145000000
chr5	145900000	147150000	1516
chr5	147250000	148600000	1485							chr5	147250000	148600000
chr5	148700000	149750000	1525	chr5	148700000	149600000
chr5	148700000	151100000	1444
chr5	149800000	151100000	1504							chr5	149850000	151050000
chr5	151150000	151850000	1521							chr5	151150000	151850000	chr5	151150000	151850000
chr5	151900000	153300000	1482							chr5	151900000	153300000	chr5	151900000	153300000
chr5	152650000	153300000	1531
chr5	153350000	154300000	1487	chr5	153350000	154400000	chr5	153350000	154350000	chr5	153350000	154300000	chr5	153350000	154300000
chr5	154900000	156550000	1442										chr5	154750000	156550000
chr5	156600000	157350000	1522
chr5	157150000	159750000	1445										chr5	157200000	159750000
chr5	157400000	158550000	1462	chr5	157200000	158550000	chr5	157250000	158550000	chr5	157400000	158550000	chr5	157350000	158550000
chr5	158650000	159400000	1429										chr5	158600000	159450000
chr5	159900000	161100000	1497				chr5	159900000	161100000	chr5	159900000	161100000	chr5	159900000	161100000
chr5	159900000	162850000	1436										chr5	159900000	162850000
chr5	161450000	162850000	1493							chr5	161350000	162800000	chr5	161350000	162800000
chr5	162950000	163950000	1508	chr5	163000000	163900000	chr5	162950000	163900000	chr5	162950000	163950000	chr5	163000000	163900000
chr5	162950000	164700000	1517	chr5	163000000	164700000				chr5	162950000	164750000	chr5	162950000	164700000
chr5	165000000	166550000	1526							chr5	165000000	166550000	chr5	165000000	166450000
chr5	167650000	169600000	1501							chr5	167650000	169450000	chr5	167650000	169450000
chr5	168050000	169000000	1518	chr5	168050000	168950000
chr5	171900000	172750000	1506										chr5	171850000	172750000
chr5	175800000	176500000	1532
chr5	176950000	177550000	1488	chr5	176950000	177600000
chr5	177650000	178950000	1452							chr5	177650000	179000000	chr5	177650000	178950000
chr6	1500000	2700000	1593	chr6	1550000	2650000	chr6	1550000	2650000	chr6	1550000	2650000	chr6	1500000	2700000
chr6	3100000	4000000	1627	chr6	3100000	4000000	chr6	3100000	3950000	chr6	3050000	4000000	chr6	3100000	4000000
chr6	4200000	5050000	1610	chr6	4150000	5000000	chr6	4150000	5000000	chr6	4150000	5050000	chr6	4200000	5050000
chr6	5400000	6550000	1622	chr6	5400000	6550000				chr6	5400000	6550000	chr6	5400000	6550000
chr6	6600000	7350000	1545	chr6	6600000	7300000							chr6	6600000	7350000
chr6	8250000	10400000	1570							chr6	8200000	10400000	chr6	8250000	10400000
chr6	11550000	12650000	1553	chr6	11600000	12600000	chr6	11600000	12600000	chr6	11600000	12600000	chr6	11550000	12650000
chr6	13750000	16200000	1546
chr6	14150000	15600000	1579				chr6	14300000	15550000	chr6	14150000	15500000	chr6	14150000	15600000
chr6	16250000	16950000	1562	chr6	16250000	16950000	chr6	16250000	16950000	chr6	16250000	16950000	chr6	16250000	16950000
chr6	17100000	18500000	1595	chr6	17100000	18500000	chr6	17100000	18500000	chr6	17100000	18450000	chr6	17100000	18450000
chr6	18600000	20000000	1587	chr6	18650000	20000000	chr6	18600000	20000000	chr6	18600000	20000000	chr6	18600000	20050000
chr6	20200000	24350000	1557										chr6	20250000	24350000
chr6	20500000	23000000	1540
chr6	20550000	21550000	1590	chr6	20500000	21550000	chr6	20550000	21550000	chr6	20550000	21550000	chr6	20550000	21550000
chr6	21800000	22900000	1650	chr6	21700000	22850000	chr6	21700000	22950000				chr6	21650000	22850000
chr6	23050000	24200000	1636
chr6	24500000	25950000	1552
chr6	25100000	25950000	1541							chr6	25100000	25950000	chr6	25100000	26000000
chr6	26550000	27750000	1547										chr6	26550000	27700000
chr6	30300000	31400000	1631	chr6	30400000	31400000	chr6	30300000	31400000	chr6	30400000	31400000	chr6	30400000	31400000
chr6	32050000	33200000	1574
chr6	33550000	35200000	1583							chr6	33550000	35200000	chr6	33550000	35200000
chr6	37350000	38750000	1616	chr6	37250000	38700000	chr6	37250000	38700000	chr6	37300000	38650000	chr6	37300000	38650000
chr6	38900000	41000000	1571							chr6	38950000	41000000	chr6	38850000	41000000
chr6	41650000	43550000	1584
chr6	41650000	44350000	1559
chr6	43550000	44300000	1556				chr6	43500000	44250000	chr6	43550000	44300000	chr6	43500000	44300000
chr6	44400000	45900000	1589	chr6	44400000	45850000	chr6	44400000	45850000	chr6	44350000	45900000	chr6	44400000	45900000
chr6	45300000	45900000	1634
chr6	46000000	46750000	1605	chr6	45950000	46750000				chr6	45950000	46750000	chr6	45950000	46750000
chr6	47050000	49450000	1561
chr6	47750000	49350000	1633							chr6	47750000	49350000
chr6	50750000	51850000	1598				chr6	50750000	51900000	chr6	50650000	51850000	chr6	50650000	51900000
chr6	52000000	53650000	1592							chr6	51950000	53550000	chr6	51950000	53550000
chr6	53800000	55050000	1635							chr6	53800000	55000000	chr6	53800000	55000000
chr6	53800000	56100000	1558
chr6	55100000	56100000	1602							chr6	55100000	56100000	chr6	55150000	56100000
chr6	56450000	57250000	1537
chr6	57400000	58000000	1542
chr6	62450000	63400000	1554
chr6	66150000	67200000	1638							chr6	66250000	67150000	chr6	66200000	67200000
chr6	67600000	69200000	1609							chr6	67700000	69200000	chr6	67600000	69200000
chr6	68400000	69150000	1648							chr6	68350000	69100000
chr6	71000000	71700000	1596	chr6	71000000	71750000	chr6	70950000	71750000	chr6	70950000	71700000	chr6	70950000	71700000
chr6	72100000	72950000	1588	chr6	72100000	72900000	chr6	72200000	73000000	chr6	72100000	72950000	chr6	72050000	72950000
chr6	74900000	75900000	1560
chr6	76600000	77550000	1617							chr6	76600000	77550000	chr6	76600000	77500000
chr6	76800000	79500000	1544							chr6	76600000	79500000
chr6	77350000	79500000	1568
chr6	79550000	80400000	1594	chr6	79550000	80400000	chr6	79550000	80450000	chr6	79550000	80500000	chr6	79550000	80450000
chr6	80900000	82750000	1608				chr6	80850000	82750000	chr6	80800000	82750000	chr6	80800000	82800000
chr6	82900000	83700000	1580							chr6	82900000	83700000	chr6	82900000	83700000
chr6	84300000	86150000	1624							chr6	84350000	86050000
chr6	84950000	85750000	1625
chr6	86400000	87650000	1581							chr6	86400000	87700000	chr6	86450000	87650000
chr6	87800000	89600000	1555							chr6	87800000	89600000	chr6	87800000	89600000
chr6	88350000	89600000	1534				chr6	88500000	89600000	chr6	88400000	89600000	chr6	88400000	89600000
chr6	89650000	90400000	1600	chr6	89650000	90400000	chr6	89650000	90400000	chr6	89650000	90450000	chr6	89650000	90450000
chr6	90550000	91250000	1543	chr6	90550000	91250000	chr6	90550000	91250000	chr6	90550000	91250000	chr6	90550000	91250000
chr6	91600000	93350000	1538							chr6	91600000	93350000	chr6	91550000	93400000
chr6	95800000	97600000	1550
chr6	96900000	97700000	1628
chr6	97900000	99550000	1623							chr6	97900000	99650000	chr6	97900000	99550000
chr6	100350000	101100000	1621	chr6	100400000	101150000	chr6	100350000	101100000	chr6	100350000	101100000	chr6	100300000	101150000
chr6	103900000	105000000	1637							chr6	103950000	105000000
chr6	105850000	106800000	1539							chr6	105850000	106700000	chr6	105850000	106750000
chr6	107350000	108200000	1643							chr6	107400000	108150000	chr6	107350000	108200000
chr6	108250000	109400000	1644							chr6	108250000	109400000	chr6	108250000	109400000
chr6	109800000	110700000	1620							chr6	109800000	110700000	chr6	109800000	110700000
chr6	110800000	111400000	1577
chr6	112700000	114300000	1535
chr6	114750000	116250000	1575	chr6	114850000	116250000	chr6	114900000	116250000	chr6	114650000	116300000	chr6	114650000	116250000
chr6	114900000	115600000	1651										chr6	114850000	115600000
chr6	116300000	117000000	1615
chr6	117550000	119100000	1599	chr6	117550000	119100000	chr6	117550000	119050000	chr6	117550000	119100000	chr6	117550000	119100000
chr6	118200000	118900000	1649				chr6	118300000	118900000				chr6	118200000	118900000
chr6	121650000	122450000	1640							chr6	121700000	122450000	chr6	121650000	122450000
chr6	122800000	123650000	1647							chr6	122900000	123650000	chr6	122900000	123650000
chr6	124050000	125450000	1641
chr6	125450000	127550000	1586
chr6	126300000	127550000	1626							chr6	126350000	127450000	chr6	126300000	127500000
chr6	127950000	129700000	1604							chr6	127950000	129700000	chr6	127900000	129650000
chr6	129800000	131400000	1585
chr6	130250000	131900000	1573										chr6	130350000	131900000
chr6	130350000	131150000	1614										chr6	130400000	131150000
chr6	132100000	134200000	1566							chr6	132100000	134200000
chr6	133150000	134200000	1607							chr6	133150000	134150000	chr6	133150000	134100000
chr6	134250000	136650000	1548
chr6	134400000	135250000	1551	chr6	134300000	135200000	chr6	134400000	135200000	chr6	134300000	135200000	chr6	134400000	135250000
chr6	135800000	136650000	1578							chr6	135800000	136700000	chr6	135800000	136650000
chr6	137100000	138350000	1591	chr6	137100000	138350000	chr6	137150000	138350000	chr6	137100000	138350000	chr6	137100000	138400000
chr6	139650000	142000000	1611							chr6	139650000	142050000	chr6	139700000	142000000
chr6	140350000	141200000	1652
chr6	141250000	141900000	1597
chr6	142850000	143750000	1564	chr6	142850000	143750000	chr6	142850000	143750000	chr6	142800000	143750000	chr6	142850000	143750000
chr6	146250000	147050000	1642							chr6	146250000	147050000	chr6	146250000	147050000
chr6	147100000	148700000	1612							chr6	147150000	148550000	chr6	147150000	148750000
chr6	147700000	148500000	1639
chr6	148850000	149850000	1563							chr6	148850000	149950000
chr6	150150000	151150000	1601				chr6	150150000	151150000	chr6	150150000	151150000	chr6	150150000	151150000
chr6	150150000	151650000	1603							chr6	150150000	151650000
chr6	151800000	152750000	1582	chr6	151800000	152650000	chr6	151800000	152700000	chr6	151800000	152700000	chr6	151800000	152750000
chr6	153000000	154350000	1629							chr6	152850000	154350000	chr6	153050000	154300000
chr6	154900000	158450000	1536
chr6	154950000	155600000	1645	chr6	155000000	155600000
chr6	154950000	157700000	1549
chr6	155850000	156700000	1630
chr6	156750000	157500000	1618	chr6	156850000	157500000	chr6	156850000	157500000
chr6	157700000	158450000	1619							chr6	157650000	158500000	chr6	157700000	158500000
chr6	158550000	159500000	1572	chr6	158550000	159500000	chr6	158550000	159500000				chr6	158550000	159500000
chr6	159550000	160950000	1606							chr6	159550000	160950000	chr6	159550000	160950000
chr6	161100000	161800000	1567	chr6	161100000	161800000	chr6	161100000	161800000	chr6	161100000	161800000	chr6	161100000	161800000
chr6	163300000	165600000	1565							chr6	163500000	165500000
chr6	163550000	164400000	1632										chr6	163600000	164400000
chr6	164500000	165400000	1613	chr6	164500000	165350000	chr6	164500000	165400000	chr6	164500000	165350000	chr6	164550000	165450000
chr6	165800000	166500000	1646
chr6	168500000	170900000	1576							chr6	168650000	170950000	chr6	168550000	170900000
chr6	168650000	170000000	1569							chr6	168700000	170050000	chr6	168700000	170000000
chr7	1550000	2500000	1676	chr7	1500000	2400000	chr7	1500000	2400000	chr7	1500000	2500000	chr7	1500000	2450000
chr7	3250000	4600000	1673	chr7	3200000	4600000	chr7	3250000	4600000	chr7	3200000	4600000	chr7	3200000	4600000
chr7	5800000	6950000	1656
chr7	5850000	6450000	1681										chr7	5800000	6500000
chr7	7000000	8350000	1661										chr7	6950000	8350000
chr7	8450000	11350000	1672
chr7	9350000	10450000	1770
chr7	11400000	12500000	1745							chr7	11400000	12500000	chr7	11400000	12450000
chr7	12550000	13250000	1751	chr7	12550000	13300000	chr7	12550000	13300000	chr7	12550000	13300000	chr7	12550000	13250000
chr7	12550000	14700000	1699
chr7	13450000	14550000	1760	chr7	13500000	14450000	chr7	13450000	14700000	chr7	13500000	14700000	chr7	13500000	14550000
chr7	15150000	16600000	1705										chr7	15150000	16600000
chr7	15200000	16100000	1749	chr7	15250000	16100000				chr7	15200000	16150000	chr7	15200000	16100000
chr7	16950000	17650000	1684	chr7	16950000	17650000				chr7	16950000	17650000	chr7	16900000	17650000
chr7	18750000	19650000	1750										chr7	18750000	19650000
chr7	19750000	20500000	1654
chr7	21050000	22050000	1712	chr7	20950000	22050000
chr7	23550000	24800000	1717				chr7	23550000	24800000				chr7	23550000	24800000
chr7	25250000	28150000	1671
chr7	27200000	28050000	1710				chr7	27250000	28100000	chr7	27200000	28050000	chr7	27200000	28100000
chr7	28150000	28900000	1690	chr7	28200000	28900000	chr7	28200000	28900000	chr7	28150000	28900000	chr7	28150000	28900000
chr7	28150000	29600000	1680										chr7	28150000	29650000
chr7	29950000	30750000	1698	chr7	29950000	30750000	chr7	29950000	30750000	chr7	29900000	30700000	chr7	29950000	30650000
chr7	31150000	32500000	1693	chr7	31150000	32450000	chr7	31050000	32400000	chr7	31150000	32500000	chr7	31000000	32450000
chr7	32650000	34050000	1696	chr7	32600000	33950000
chr7	33200000	34050000	1703	chr7	33200000	34000000	chr7	33200000	33950000	chr7	33150000	34050000	chr7	33200000	34000000
chr7	35650000	36400000	1755
chr7	36400000	37950000	1737
chr7	36450000	37250000	1741	chr7	36400000	37250000				chr7	36450000	37200000	chr7	36450000	37200000
chr7	38550000	39550000	1704	chr7	38550000	39550000	chr7	38600000	39550000	chr7	38550000	39550000	chr7	38500000	39550000
chr7	40800000	41850000	1725
chr7	41950000	42850000	1711				chr7	41950000	42850000	chr7	41950000	42850000	chr7	41950000	42850000
chr7	42950000	43900000	1682							chr7	42900000	43850000
chr7	44000000	45150000	1720	chr7	44150000	45200000	chr7	44150000	45150000	chr7	44050000	45150000	chr7	44050000	45150000
chr7	45200000	45850000	1729
chr7	45350000	47250000	1662
chr7	45350000	47900000	1663
chr7	45900000	47200000	1721							chr7	45900000	47150000	chr7	45900000	47200000
chr7	47250000	48150000	1728	chr7	47250000	48150000	chr7	47300000	48150000	chr7	47250000	48200000
chr7	48250000	49950000	1734				chr7	48500000	49950000	chr7	48300000	49900000	chr7	48250000	49900000
chr7	48350000	48950000	1767
chr7	49250000	49950000	1732
chr7	51450000	54700000	1687	chr7	51450000	54700000	chr7	51450000	54700000	chr7	51500000	54700000	chr7	51450000	54700000
chr7	51500000	53050000	1762
chr7	56200000	58000000	1695
chr7	65150000	66750000	1708
chr7	66800000	70250000	1668
chr7	66850000	68500000	1753	chr7	66900000	68700000	chr7	66900000	68550000	chr7	66850000	68750000	chr7	66850000	68600000
chr7	70300000	72000000	1685							chr7	70300000	72200000	chr7	70300000	72000000
chr7	72600000	75950000	1653	chr7	72900000	75950000				chr7	72400000	75950000	chr7	72400000	75950000
chr7	76050000	77400000	1665
chr7	77700000	78800000	1739							chr7	77700000	78850000	chr7	77700000	78800000
chr7	78900000	79600000	1771										chr7	78900000	79550000
chr7	80300000	81050000	1719	chr7	80300000	81050000	chr7	80300000	81050000	chr7	80300000	81050000	chr7	80300000	81000000
chr7	81100000	82350000	1716	chr7	81100000	82350000				chr7	81100000	82350000	chr7	81050000	82350000
chr7	81650000	82350000	1688							chr7	81650000	82350000
chr7	82950000	85400000	1683
chr7	83550000	84600000	1738							chr7	83550000	84600000	chr7	83500000	84600000
chr7	84650000	85350000	1757										chr7	84650000	85400000
chr7	85450000	86350000	1731										chr7	85450000	86500000
chr7	86800000	87800000	1735	chr7	86750000	87800000	chr7	86700000	87800000	chr7	86800000	87800000	chr7	86800000	87800000
chr7	88400000	89700000	1700										chr7	88400000	89700000
chr7	89950000	90650000	1744
chr7	89950000	91500000	1674							chr7	90000000	91450000	chr7	90050000	91500000
chr7	90800000	91450000	1709				chr7	90700000	91400000
chr7	92150000	92900000	1664				chr7	92150000	92850000	chr7	92150000	92850000	chr7	92150000	92850000
chr7	93000000	95300000	1666							chr7	92950000	95300000	chr7	93200000	95300000
chr7	93200000	94000000	1689										chr7	93200000	94000000
chr7	94050000	95300000	1756							chr7	94050000	95300000	chr7	94050000	95450000
chr7	95500000	96650000	1718	chr7	95500000	96650000	chr7	95500000	96650000	chr7	95500000	96650000	chr7	95500000	96650000
chr7	95500000	97550000	1694							chr7	95450000	97550000	chr7	95500000	97500000
chr7	96700000	97550000	1701	chr7	96700000	97550000	chr7	96700000	97500000	chr7	96700000	97550000	chr7	96700000	97500000
chr7	100350000	100950000	1764
chr7	102300000	103000000	1659
chr7	103050000	104450000	1686							chr7	103000000	104450000	chr7	103000000	104500000
chr7	103100000	103800000	1730							chr7	103100000	103800000	chr7	103100000	103800000
chr7	103850000	104450000	1702							chr7	103850000	104450000	chr7	103850000	104450000
chr7	104550000	105200000	1678	chr7	104550000	105200000				chr7	104550000	105150000	chr7	104550000	105200000
chr7	105250000	106350000	1758
chr7	106800000	107550000	1748							chr7	106800000	107500000	chr7	106800000	107550000
chr7	108200000	112100000	1670
chr7	110050000	111350000	1761							chr7	110050000	111350000	chr7	110050000	111350000
chr7	111400000	112100000	1746	chr7	111400000	112050000				chr7	111400000	112050000	chr7	111400000	112050000
chr7	112150000	113100000	1724							chr7	112150000	113050000	chr7	112100000	113100000
chr7	113600000	115600000	1692							chr7	113600000	115600000	chr7	113550000	115550000
chr7	115650000	116450000	1677	chr7	115750000	116450000	chr7	115750000	116450000	chr7	115750000	116450000	chr7	115750000	116450000
chr7	116800000	117800000	1754							chr7	116850000	117800000	chr7	116800000	117800000
chr7	117950000	118800000	1768										chr7	117950000	118800000
chr7	119650000	120350000	1763							chr7	119550000	120350000	chr7	119550000	120350000
chr7	120600000	121600000	1713
chr7	121700000	123000000	1740							chr7	121700000	123000000	chr7	121700000	123050000
chr7	123600000	124500000	1722							chr7	123650000	124500000
chr7	124650000	125400000	1752
chr7	124650000	126850000	1660										chr7	124950000	126950000
chr7	125450000	126500000	1736							chr7	125450000	126550000	chr7	125550000	126550000
chr7	127200000	127900000	1691	chr7	127150000	127950000	chr7	127200000	127950000	chr7	127150000	127950000	chr7	127150000	127950000
chr7	128050000	128850000	1747							chr7	128050000	128800000	chr7	128050000	128900000
chr7	128950000	129650000	1743	chr7	128950000	129650000				chr7	128950000	129650000	chr7	128950000	129650000
chr7	131250000	134050000	1715							chr7	131250000	134050000	chr7	131300000	134050000
chr7	131350000	132250000	1723	chr7	131300000	132250000	chr7	131350000	132250000	chr7	131350000	132200000	chr7	131350000	132250000
chr7	132350000	133000000	1769
chr7	134100000	135050000	1759
chr7	136100000	137200000	1742
chr7	137300000	138550000	1714							chr7	137250000	138600000	chr7	137250000	138600000
chr7	139100000	140050000	1679							chr7	139100000	140050000	chr7	139050000	140050000
chr7	140200000	141450000	1733										chr7	140200000	141400000
chr7	144600000	147900000	1667
chr7	144700000	145800000	1765							chr7	144700000	145750000	chr7	144650000	145750000
chr7	146950000	147900000	1766	chr7	147000000	147850000	chr7	147000000	147850000
chr7	147950000	148650000	1726
chr7	148800000	150950000	1669							chr7	148900000	150750000
chr7	149950000	150700000	1727				chr7	149900000	150750000	chr7	150000000	150650000	chr7	149950000	150700000
chr7	151650000	152500000	1655							chr7	151750000	152500000	chr7	151700000	152500000
chr7	152600000	154250000	1675							chr7	152600000	154250000	chr7	152600000	154250000
chr7	154600000	155500000	1706				chr7	154650000	155500000	chr7	154650000	155500000	chr7	154600000	155450000
chr7	154650000	156650000	1657
chr7	155550000	156600000	1697				chr7	155600000	156600000	chr7	155550000	156600000	chr7	155550000	156600000
chr7	157200000	159100000	1707	chr7	157200000	159100000	chr7	157200000	159100000	chr7	157200000	159100000	chr7	157200000	159100000
chr7	157250000	158250000	1658				chr7	157400000	158250000	chr7	157300000	158300000	chr7	157250000	158300000
chr8	2100000	4800000	1805	chr8	2150000	4850000	chr8	2400000	4850000
chr8	2150000	2850000	1875
chr8	2750000	4800000	1845
chr8	4900000	5950000	1865	chr8	4900000	5950000	chr8	4900000	5950000				chr8	4900000	5950000
chr8	6050000	6750000	1790										chr8	6100000	6800000
chr8	8900000	9700000	1838							chr8	8900000	9800000
chr8	10900000	11850000	1784
chr8	12700000	13500000	1792	chr8	12700000	13500000	chr8	12700000	13500000	chr8	12700000	13500000	chr8	12700000	13500000
chr8	13550000	16950000	1778										chr8	13550000	16950000
chr8	14100000	16950000	1774
chr8	15200000	16850000	1855
chr8	17100000	17750000	1863										chr8	17050000	17750000
chr8	17900000	18650000	1860	chr8	17900000	18700000	chr8	17900000	18700000	chr8	17900000	18650000	chr8	17950000	18600000
chr8	18750000	20000000	1854	chr8	18750000	20000000				chr8	18750000	20000000
chr8	20250000	21750000	1834				chr8	20250000	21750000	chr8	20200000	21750000	chr8	20250000	21750000
chr8	20850000	21700000	1837							chr8	20850000	21750000	chr8	20850000	21750000
chr8	22000000	23250000	1841
chr8	23550000	24250000	1856
chr8	24750000	27100000	1775
chr8	24900000	26050000	1858	chr8	24900000	26200000	chr8	24950000	26050000	chr8	24900000	26100000	chr8	24900000	26150000
chr8	29050000	29950000	1782	chr8	29050000	29950000	chr8	29050000	29950000	chr8	29050000	29950000	chr8	29050000	29950000
chr8	30050000	31000000	1806
chr8	31050000	33250000	1803							chr8	31050000	33250000	chr8	31050000	33250000
chr8	31100000	32100000	1851							chr8	31100000	32100000	chr8	31100000	32150000
chr8	32350000	33250000	1847							chr8	32400000	33200000	chr8	32300000	33250000
chr8	33500000	36600000	1812							chr8	33550000	36600000
chr8	33550000	34800000	1871
chr8	34900000	36600000	1831
chr8	36650000	37550000	1802							chr8	36700000	37550000	chr8	36650000	37550000
chr8	37700000	38650000	1826							chr8	37700000	38650000	chr8	37600000	38600000
chr8	38900000	39800000	1859	chr8	38900000	39800000				chr8	38850000	39800000
chr8	38900000	41250000	1789
chr8	40100000	40900000	1846	chr8	40050000	40850000
chr8	41400000	42900000	1799							chr8	41400000	42750000	chr8	41450000	42850000
chr8	48100000	48900000	1814										chr8	48100000	48850000
chr8	49000000	49800000	1818	chr8	49000000	49800000	chr8	49000000	49800000	chr8	49000000	49800000	chr8	49050000	49800000
chr8	49850000	52700000	1795										chr8	50200000	52700000
chr8	51500000	52500000	1864							chr8	51500000	52500000	chr8	51500000	52450000
chr8	53450000	55300000	1824										chr8	53450000	55150000
chr8	55450000	56400000	1849
chr8	57150000	58000000	1829							chr8	57150000	58000000	chr8	57150000	58000000
chr8	58100000	59500000	1813	chr8	58250000	59500000	chr8	58250000	59450000	chr8	58250000	59450000	chr8	58300000	59500000
chr8	59600000	61050000	1823	chr8	59600000	61050000				chr8	59600000	61250000	chr8	59600000	61050000
chr8	61300000	62500000	1807							chr8	61400000	62500000	chr8	61350000	62500000
chr8	61400000	62000000	1783
chr8	62650000	64000000	1839	chr8	62650000	64000000	chr8	62650000	64000000	chr8	62650000	64000000	chr8	62650000	64000000
chr8	64250000	65250000	1796	chr8	64250000	65250000	chr8	64250000	65250000	chr8	64250000	65250000	chr8	64250000	65250000
chr8	69450000	70500000	1830							chr8	69450000	70450000	chr8	69400000	70450000
chr8	70550000	71550000	1787	chr8	70550000	71550000	chr8	70550000	71550000	chr8	70550000	71550000	chr8	70550000	71550000
chr8	71650000	72650000	1797	chr8	71700000	72600000	chr8	71650000	72650000	chr8	71650000	72650000	chr8	71650000	72650000
chr8	73150000	73850000	1825										chr8	73200000	73850000
chr8	74200000	74950000	1870							chr8	74150000	74950000
chr8	75050000	75800000	1817							chr8	75050000	75800000
chr8	76000000	79200000	1773
chr8	76050000	78450000	1779
chr8	77250000	78300000	1853										chr8	77250000	78300000
chr8	78400000	79200000	1816							chr8	78450000	79200000	chr8	78400000	79150000
chr8	79300000	80400000	1827							chr8	79250000	80350000	chr8	79300000	80350000
chr8	80500000	82600000	1794							chr8	80500000	82600000
chr8	83050000	85500000	1780
chr8	87650000	89850000	1788							chr8	87600000	89950000
chr8	90700000	92100000	1786							chr8	90700000	92050000	chr8	90700000	92050000
chr8	92450000	94600000	1808							chr8	92450000	94600000	chr8	92500000	94600000
chr8	94700000	95700000	1868
chr8	96300000	97200000	1820				chr8	96350000	97250000	chr8	96300000	97200000	chr8	96350000	97200000
chr8	96300000	98550000	1800							chr8	96300000	98550000
chr8	97300000	98550000	1857	chr8	97300000	98500000	chr8	97300000	98550000	chr8	97300000	98500000	chr8	97300000	98550000
chr8	99150000	101100000	1835							chr8	99150000	101100000	chr8	99150000	101100000
chr8	102300000	103900000	1781										chr8	102300000	103850000
chr8	102500000	103200000	1840	chr8	102450000	103200000
chr8	103250000	103850000	1822							chr8	103250000	103850000
chr8	104550000	106800000	1777
chr8	105800000	106750000	1844	chr8	105800000	106750000	chr8	105800000	106750000	chr8	105800000	106750000	chr8	105800000	106750000
chr8	106800000	108750000	1801
chr8	106850000	107650000	1828							chr8	106850000	107650000	chr8	106900000	107650000
chr8	107900000	108750000	1869							chr8	107900000	108700000	chr8	107950000	108750000
chr8	108850000	109750000	1836	chr8	108800000	109700000	chr8	108850000	109700000	chr8	108850000	109750000	chr8	108800000	109700000
chr8	110700000	111850000	1866
chr8	112900000	113600000	1876
chr8	113700000	115500000	1785	chr8	113750000	115450000							chr8	113750000	115500000
chr8	114300000	115450000	1804	chr8	114400000	115450000	chr8	114350000	115450000	chr8	114200000	115500000
chr8	115650000	118100000	1791							chr8	115700000	118100000
chr8	115700000	117500000	1832	chr8	115900000	117700000	chr8	115700000	117550000	chr8	115700000	117450000	chr8	115700000	117500000
chr8	115800000	116600000	1873							chr8	115800000	116600000
chr8	116650000	117450000	1872
chr8	118300000	120200000	1850							chr8	118300000	120150000	chr8	118300000	120400000
chr8	118350000	119450000	1867										chr8	118450000	119450000
chr8	120800000	121950000	1843				chr8	120850000	122000000				chr8	120850000	122000000
chr8	122200000	123600000	1848	chr8	122200000	123600000	chr8	122200000	123600000	chr8	122200000	123600000	chr8	122250000	123600000
chr8	122800000	123600000	1874
chr8	124800000	125450000	1793	chr8	124850000	125450000	chr8	124850000	125450000	chr8	124800000	125450000	chr8	124800000	125400000
chr8	125500000	126700000	1809							chr8	125500000	126700000
chr8	126800000	127750000	1811	chr8	126850000	127750000	chr8	126850000	127750000	chr8	126850000	127750000	chr8	126850000	127750000
chr8	127800000	129350000	1819							chr8	127850000	129300000
chr8	129950000	130750000	1798	chr8	130000000	130700000	chr8	130000000	130700000	chr8	130000000	130700000	chr8	129950000	130700000
chr8	130800000	131700000	1810	chr8	130800000	131700000	chr8	130800000	131700000	chr8	130800000	131700000	chr8	130800000	131700000
chr8	131850000	133100000	1821
chr8	133800000	134400000	1852				chr8	133700000	134400000				chr8	133750000	134450000
chr8	134450000	135850000	1842	chr8	134500000	135900000	chr8	134500000	135900000	chr8	134450000	135700000	chr8	134450000	135850000
chr8	136400000	139100000	1772
chr8	136450000	137750000	1833							chr8	136450000	137750000	chr8	136450000	137750000
chr8	140400000	141400000	1862
chr8	141550000	142400000	1815							chr8	141550000	142400000	chr8	141500000	142400000
chr8	142450000	143450000	1776	chr8	142500000	143450000
chr8	143700000	144300000	1861							chr8	143700000	144300000
chr9	1000000	2050000	1941										chr9	1000000	2000000
chr9	2150000	2800000	1903							chr9	2150000	2850000	chr9	2200000	2800000
chr9	2850000	4300000	1887							chr9	3000000	4300000	chr9	2850000	4350000
chr9	4600000	5700000	1894	chr9	4650000	5600000	chr9	4650000	5700000	chr9	4600000	5700000	chr9	4650000	5700000
chr9	5800000	6750000	1944	chr9	5800000	6700000	chr9	5800000	6750000	chr9	5800000	6700000	chr9	5850000	6750000
chr9	7400000	9900000	1891
chr9	7550000	8350000	1952							chr9	7550000	8350000
chr9	10250000	12450000	1923	chr9	10450000	12450000	chr9	10300000	12450000	chr9	10250000	12450000	chr9	10250000	12450000
chr9	10350000	11300000	1945
chr9	11550000	12400000	1949
chr9	13250000	14400000	1919	chr9	13400000	14500000	chr9	13300000	14500000	chr9	13300000	14400000	chr9	13250000	14350000
chr9	15800000	17450000	1916							chr9	15800000	17450000	chr9	15800000	17450000
chr9	17500000	18200000	1926							chr9	17500000	18200000
chr9	18250000	19000000	1946	chr9	18250000	19000000				chr9	18250000	19000000
chr9	20300000	21100000	1889	chr9	20350000	21100000	chr9	20400000	21100000	chr9	20250000	21100000	chr9	20300000	21100000
chr9	21200000	22200000	1912	chr9	21200000	22200000				chr9	21200000	22250000
chr9	22450000	23250000	1953
chr9	22450000	25850000	1877	chr9	22350000	25850000				chr9	22300000	25750000
chr9	22700000	24400000	1929
chr9	23450000	24250000	1955										chr9	23450000	24250000
chr9	28650000	32300000	1882
chr9	29700000	30750000	1951							chr9	29800000	30700000
chr9	30900000	32250000	1902
chr9	32300000	32950000	1895							chr9	32300000	32950000	chr9	32350000	32950000
chr9	33300000	34350000	1950
chr9	33700000	36200000	1880
chr9	34650000	35600000	1924							chr9	34650000	35700000	chr9	34700000	35550000
chr9	36800000	37400000	1884							chr9	36800000	37400000
chr9	37650000	38450000	1898	chr9	37600000	38450000	chr9	37650000	38450000	chr9	37650000	38500000	chr9	37600000	38400000
chr9	74400000	75450000	1927							chr9	74400000	75450000	chr9	74450000	75400000
chr9	75800000	77250000	1925							chr9	75800000	77300000	chr9	75800000	77300000
chr9	77800000	78700000	1938	chr9	77800000	78650000				chr9	77800000	78650000	chr9	77800000	78600000
chr9	79950000	80950000	1947							chr9	80000000	80950000	chr9	80000000	80950000
chr9	81000000	82750000	1935	chr9	81250000	82750000				chr9	81000000	82800000	chr9	81050000	82750000
chr9	81900000	82650000	1940							chr9	81900000	82750000
chr9	82850000	85700000	1908	chr9	83050000	85650000	chr9	83100000	85600000	chr9	82800000	85750000	chr9	82850000	85750000
chr9	86950000	88200000	1909	chr9	86950000	88200000	chr9	86950000	88250000	chr9	86950000	88100000	chr9	86950000	88350000
chr9	89000000	89900000	1904	chr9	89000000	89900000	chr9	89000000	89900000				chr9	89000000	89900000
chr9	89000000	90400000	1913				chr9	89000000	90400000	chr9	89000000	90350000	chr9	89000000	90400000
chr9	90500000	91700000	1885							chr9	90550000	91750000	chr9	90450000	91850000
chr9	93650000	94600000	1900	chr9	93650000	94600000	chr9	93650000	94600000	chr9	93650000	94600000	chr9	93650000	94700000
chr9	94800000	95550000	1888	chr9	94800000	95500000	chr9	94750000	95500000	chr9	94850000	95500000	chr9	94850000	95550000
chr9	97200000	100450000	1896
chr9	97300000	99100000	1906
chr9	98050000	99000000	1921	chr9	98000000	98950000	chr9	98050000	98950000	chr9	98000000	99050000	chr9	98000000	99100000
chr9	99450000	100150000	1943
chr9	100450000	101650000	1910
chr9	101850000	103100000	1883							chr9	101900000	103150000	chr9	101700000	103150000
chr9	103300000	104300000	1892							chr9	103300000	104200000	chr9	103350000	104300000
chr9	104350000	107450000	1890							chr9	104350000	107450000	chr9	104350000	107450000
chr9	107500000	108450000	1920	chr9	107500000	108450000	chr9	107500000	108450000	chr9	107500000	108500000	chr9	107500000	108450000
chr9	108550000	109950000	1939							chr9	108550000	110050000	chr9	108550000	110050000
chr9	108550000	111550000	1881
chr9	110150000	111500000	1933	chr9	110150000	111450000	chr9	110150000	111450000	chr9	110150000	111450000	chr9	110150000	111500000
chr9	111550000	112250000	1930							chr9	111550000	112250000
chr9	113350000	114150000	1879	chr9	113300000	114150000	chr9	113300000	114150000	chr9	113300000	114150000	chr9	113350000	114150000
chr9	114350000	115600000	1897	chr9	114400000	115600000	chr9	114350000	115600000	chr9	114400000	115600000	chr9	114350000	115600000
chr9	114450000	115050000	1928							chr9	114400000	115100000
chr9	118350000	119400000	1948	chr9	118350000	119450000	chr9	118350000	119400000	chr9	118350000	119400000	chr9	118350000	119400000
chr9	118450000	120200000	1922										chr9	118350000	120150000
chr9	119450000	120200000	1942							chr9	119450000	120200000	chr9	119450000	120200000
chr9	120250000	123100000	1907							chr9	120250000	123100000	chr9	120250000	123100000
chr9	121200000	122100000	1954
chr9	122250000	123150000	1918	chr9	122250000	123150000	chr9	122250000	123100000	chr9	122250000	123150000	chr9	122250000	123150000
chr9	123300000	124100000	1886	chr9	123250000	124150000	chr9	123250000	124100000	chr9	123300000	124100000	chr9	123300000	124150000
chr9	124200000	124800000	1914										chr9	124200000	124800000
chr9	124200000	125600000	1915							chr9	124300000	125600000	chr9	124200000	125600000
chr9	124900000	125750000	1937							chr9	124850000	125750000
chr9	126150000	127150000	1932	chr9	126150000	127050000				chr9	126150000	127100000	chr9	126150000	127150000
chr9	127500000	128100000	1931										chr9	127450000	128100000
chr9	127500000	129500000	1899
chr9	129550000	130150000	1901
chr9	129600000	130800000	1917
chr9	130950000	131750000	1911
chr9	133950000	135800000	1905	chr9	133950000	135800000	chr9	133900000	135800000				chr9	134200000	135800000
chr9	135200000	135800000	1934
chr9	135900000	137000000	1936
chr9	136250000	138700000	1878
chr9	137050000	138600000	1893	chr9	137050000	138650000	chr9	137100000	138650000

## Sheet: Table S9
Supplementary Table 9. The allelic SDPR values of gene promoters. Higher-order reads with fragments greater than 5 were screened for both haplotypes, and the average SDPR values were calculated per haplotype for each gene promoter. The XCI status (XCI column) is based on Balaton Consensus call from Balaton et al. (2015). S represents XCI genes, E represents escape genes, and VE represents variabl…
chrom	ENSG	SYMBL	h1_mean_SDPR	h1_read_count	h2_mean_SDPR	h2_read_count	XCI	AES_chrX	Imprinted
chr1	ENSG00000000457	SCYL3	1.58717	165	1.19164	186			Other
chr1	ENSG00000000460	C1orf112	1.46068	214	1.7344	227			Other
chr1	ENSG00000000938	FGR	1.58532	185	1.63399	203			Other
chr1	ENSG00000000971	CFH	1.34486	194	1.53152	194			Other
chr1	ENSG00000001460	STPG1	1.27511	196	1.18779	169			Other
chr1	ENSG00000001461	NIPAL3	1.25471	209	0.979911	196			Other
chr1	ENSG00000004455	AK2	1.07477	370	0.783872	397			Other
chr1	ENSG00000004487	KDM1A	1.00533	210	1.25228	182			Other
chr1	ENSG00000006555	TTC22	1.31064	163	1.50566	165			Other
chr1	ENSG00000007341	ST7L	1.35023	451	1.1337	437			Other
chr1	ENSG00000007908	SELE	1.23458	201	1.33978	172			Other
chr1	ENSG00000007923	DNAJC11	1.22031	370	1.05199	367			Other
chr1	ENSG00000007933	FMO3	1.46929	368	1.31034	330			Other
chr1	ENSG00000007968	E2F2	1.36533	264	1.22541	237			Other
chr1	ENSG00000008118	CAMK1G	1.3923	358	1.3235	329			Other
chr1	ENSG00000008128	CDK11A	1.47206	83	1.64254	89			Other
chr1	ENSG00000008130	NADK	2.31632	130	1.80433	129			Other
chr1	ENSG00000009307	CSDE1	1.55893	216	1.70676	213			Other
chr1	ENSG00000009709	PAX7	1.0934	293	1.02329	292			Other
chr1	ENSG00000009724	MASP2	1.04755	272	0.817136	302			Other
chr1	ENSG00000009780	FAM76A	1.48875	298	1.33009	308			Other
chr1	ENSG00000009790	TRAF3IP3	2.0769	253	2.27397	211			Other
chr1	ENSG00000010072	SPRTN	1.45598	406	1.24156	389			Other
chr1	ENSG00000010165	METTL13	1.4123	336	1.02987	328			Other
chr1	ENSG00000010803	SCMH1	1.15405	337	1.39131	299			Other
chr1	ENSG00000010932	FMO1	1.55342	305	1.29415	259			Other
chr1	ENSG00000011007	ELOA	1.18316	250	1.3202	242			Other
chr1	ENSG00000011009	LYPLA2	1.14921	194	1.21199	205			Other
chr1	ENSG00000011021	CLCN6	1.31296	315	1.16954	299			Other
chr1	ENSG00000014914	MTMR11	0.966055	334	1.1345	346			Other
chr1	ENSG00000016490	CLCA1	1.43707	260	1.44118	262			Other
chr1	ENSG00000016602	CLCA4	1.81181	229	1.83665	218			Other
chr1	ENSG00000018625	ATP1A2	1.09173	266	0.886386	311			Other
chr1	ENSG00000020129	NCDN	2.03144	93	1.53621	97			Other
chr1	ENSG00000020633	RUNX3	1.0712	205	1.25514	207			Other
chr1	ENSG00000021852	C8B	1.34148	274	1.26198	278			Other
chr1	ENSG00000023572	GLRX2	1.60193	290	1.43355	232			Other
chr1	ENSG00000023902	PLEKHO1	1.16559	229	0.77907	250			Other
chr1	ENSG00000023909	GCLM	2.2546	121	2.46935	122			Other
chr1	ENSG00000024526	DEPDC1	1.82673	319	1.54404	325			Other
chr1	ENSG00000025800	KPNA6	0.99427	407	1.06308	438			Other
chr1	ENSG00000026751	SLAMF7	1.18506	276	1.07407	299			Other
chr1	ENSG00000027644	INSRR	0.757646	278	0.876804	309			Other
chr1	ENSG00000027869	SH2D2A	1.39237	284	0.991042	305			Other
chr1	ENSG00000028137	TNFRSF1B	1.18529	214	1.49357	209			Other
chr1	ENSG00000031698	SARS	1.01517	491	1.17625	437			Other
chr1	ENSG00000033122	LRRC7	1.84154	213	1.72458	235			Other
chr1	ENSG00000034971	MYOC	1.52044	237	1.00617	246			Other
chr1	ENSG00000035687	ADSS	1.31812	293	1.54613	298			Other
chr1	ENSG00000036549	AC118549.1	1.54864	253	1.70535	244			Other
chr1	ENSG00000037637	FBXO42	1.44665	246	1.33848	209			Other
chr1	ENSG00000040487	PQLC2	1.22232	315	1.18984	283			Other
chr1	ENSG00000041988	THAP3	1.38147	249	1.22031	244			Other
chr1	ENSG00000042781	USH2A	1.48297	168	1.61065	188			Other
chr1	ENSG00000043514	TRIT1	0.956992	442	0.849813	436			Other
chr1	ENSG00000044012	GUCA2B	0.802251	162	1.03629	186			Other
chr1	ENSG00000047410	TPR	2.61216	190	2.11328	186			Other
chr1	ENSG00000048707	VPS13D	1.33196	291	1.315	282			Other
chr1	ENSG00000049089	COL9A2	0.655442	328	0.800537	280			Other
chr1	ENSG00000049239	H6PD	0.747414	379	0.928166	395			Other
chr1	ENSG00000049245	VAMP3	1.24603	302	1.43779	288			Other
chr1	ENSG00000049246	PER3	1.2587	168	1.47606	172			Paternal
chr1	ENSG00000049247	UTS2	1.34577	292	1.76521	286			Other
chr1	ENSG00000049249	TNFRSF9	1.41678	216	1.24361	234			Other
chr1	ENSG00000050628	PTGER3	1.18656	292	1.41231	341			Other
chr1	ENSG00000052723	SIKE1	1.41115	207	1.39443	231			Other
chr1	ENSG00000053371	AKR7A2	1.24354	339	1.13877	302			Other
chr1	ENSG00000053372	MRTO4	1.09684	363	0.974393	340			Other
chr1	ENSG00000054116	TRAPPC3	1.98184	142	2.15014	126			Other
chr1	ENSG00000054118	THRAP3	1.72169	234	1.58189	217			Other
chr1	ENSG00000054267	ARID4B	0.808622	348	1.23921	290			Other
chr1	ENSG00000054277	OPN3	1.46869	229	1.34377	225			Other
chr1	ENSG00000054282	SDCCAG8	1.67562	258	1.60608	300			Other
chr1	ENSG00000054392	HHAT	1.56467	342	1.62809	383			Other
chr1	ENSG00000054523	KIF1B	0.696304	443	0.50273	388			Other
chr1	ENSG00000055070	SZRD1	1.44665	246	1.33848	209			Other
chr1	ENSG00000055732	MCOLN3	1.5522	262	1.16347	295			Other
chr1	ENSG00000057252	SOAT1	1.44583	344	1.27388	333			Other
chr1	ENSG00000057468	MSH4	1.28627	402	0.973916	393			Other
chr1	ENSG00000057757	PITHD1	1.3085	229	1.58445	259			Other
chr1	ENSG00000058085	LAMC2	1.11047	273	1.26096	324			Other
chr1	ENSG00000058453	CROCC	2.047	70	2.06114	88			Other
chr1	ENSG00000058668	ATP2B4	0.970059	316	0.883791	290			Other
chr1	ENSG00000058673	ZC3H11A	1.55623	321	1.23569	307			Other
chr1	ENSG00000058799	YIPF1	1.22904	447	1.14242	409			Other
chr1	ENSG00000058804	NDC1	1.00058	340	1.32462	349			Other
chr1	ENSG00000059588	TARBP1	0.783409	387	0.752758	400			Other
chr1	ENSG00000060642	PIGV	0.869884	132	1.1229	151			Other
chr1	ENSG00000060656	PTPRU	1.22191	232	1.11157	245			Other
chr1	ENSG00000060688	SNRNP40	1.02906	403	1.03547	428			Other
chr1	ENSG00000060718	COL11A1	1.99241	94	1.9464	101			Other
chr1	ENSG00000064703	DDX20	1.00697	499	0.854029	420			Other
chr1	ENSG00000064886	CHI3L2	0.997926	303	1.00711	301			Other
chr1	ENSG00000065135	GNAI3	0.931861	439	0.919059	417			Other
chr1	ENSG00000065183	WDR3	2.18434	220	1.97725	180			Other
chr1	ENSG00000065243	PKN2	1.4005	336	1.46407	294			Other
chr1	ENSG00000065526	SPEN	1.00689	226	1.28169	253			Other
chr1	ENSG00000065600	TMEM206	1.27454	269	1.0064	283			Other
chr1	ENSG00000065978	YBX1	1.2983	194	1.49089	186			Other
chr1	ENSG00000066027	PPP2R5A	0.904073	311	0.878319	306			Other
chr1	ENSG00000066056	TIE1	0.945388	330	0.891681	291			Other
chr1	ENSG00000066135	KDM4A	1.30994	232	1.30448	218			Other
chr1	ENSG00000066136	NFYC	1.36489	397	1.17174	388			Other
chr1	ENSG00000066185	ZMYND12	1.60771	237	1.6483	248			Other
chr1	ENSG00000066279	ASPM	1.89284	241	2.30554	244			Other
chr1	ENSG00000066294	CD84	1.3543	302	1.5644	308			Other
chr1	ENSG00000066322	ELOVL1	0.966406	312	0.985037	309			Other
chr1	ENSG00000066557	LRRC40	2.09042	269	2.10999	263			Other
chr1	ENSG00000067208	EVI5	1.33927	337	1.12717	345			Other
chr1	ENSG00000067334	DNTTIP2	1.93767	227	1.95536	221			Other
chr1	ENSG00000067533	RRP15	1.73257	343	1.69738	298			Other
chr1	ENSG00000067606	PRKCZ	1.86022	131	1.44245	120			Other
chr1	ENSG00000067704	IARS2	2.38132	291	2.25405	248			Other
chr1	ENSG00000069248	NUP133	1.33193	400	1.29139	423			Other
chr1	ENSG00000069275	NUCKS1	1.68237	302	1.39736	314			Other
chr1	ENSG00000069424	KCNAB2	2.04338	104	1.7491	87			Other
chr1	ENSG00000069702	TGFBR3	1.08913	458	1.1698	429			Other
chr1	ENSG00000069812	HES2	1.51451	136	1.86654	135			Other
chr1	ENSG00000070759	TESK2	0.889536	439	0.947414	407			Other
chr1	ENSG00000070785	EIF2B3	0.788149	462	0.95475	402			Other
chr1	ENSG00000070831	CDC42	0.998559	338	1.43692	294			Other
chr1	ENSG00000070886	EPHA8	1.51332	224	1.18205	199			Other
chr1	ENSG00000072694	FCGR2B	2.17657	22	4.31234	24			Other
chr1	ENSG00000073754	CD5L	1.39798	149	1.80555	150			Other
chr1	ENSG00000073756	PTGS2	1.47224	298	1.60315	301			Other
chr1	ENSG00000074800	ENO1	1.04326	438	1.01328	468			Other
chr1	ENSG00000074964	ARHGEF10L	1.82016	210	1.54795	223			Other
chr1	ENSG00000075151	EIF4G3	1.26131	164	1.02383	171			Other
chr1	ENSG00000075391	RASAL2	1.98393	200	1.60191	219			Other
chr1	ENSG00000075945	KIFAP3	1.16589	283	0.903298	261			Other
chr1	ENSG00000076258	FMO4	1.47012	320	1.22574	332			Other
chr1	ENSG00000076321	KLHL20	1.23546	209	1.15293	182			Other
chr1	ENSG00000076356	PLXNA2	1.42941	376	1.60868	364			Other
chr1	ENSG00000076864	RAP1GAP	0.764978	253	0.828443	300			Other
chr1	ENSG00000077152	UBE2T	1.56219	223	1.31295	268			Other
chr1	ENSG00000077157	PPP1R12B	1.6183	179	1.3951	216			Other
chr1	ENSG00000077254	USP33	1.87142	212	1.6444	225			Other
chr1	ENSG00000077522	ACTN2	1.80852	295	1.62074	303			Other
chr1	ENSG00000077549	CAPZB	1.1092	400	1.2431	425			Other
chr1	ENSG00000077585	GPR137B	1.15763	303	1.06176	321			Other
chr1	ENSG00000078369	GNB1	1.66095	123	1.7135	99			Other
chr1	ENSG00000078618	NRDC	1.50925	131	1.72245	147			Other
chr1	ENSG00000078808	SDF4	1.2122	136	1.28011	143			Other
chr1	ENSG00000078900	TP73	1.49934	231	1.56895	204			Maternal
chr1	ENSG00000079277	MKNK1	2.29394	204	2.29077	189			Other
chr1	ENSG00000079335	CDC14A	1.06852	156	1.40053	128			Other
chr1	ENSG00000079739	PGM1	1.52377	272	1.46779	301			Other
chr1	ENSG00000080910	CFHR2	1.72933	112	2.14284	95			Other
chr1	ENSG00000081019	RSBN1	1.15838	262	1.03197	306			Other
chr1	ENSG00000081026	MAGI3	1.40104	236	1.13202	256			Other
chr1	ENSG00000081237	PTPRC	1.54231	188	1.6088	160			Other
chr1	ENSG00000081248	CACNA1S	0.938701	218	1.19692	217			Other
chr1	ENSG00000081277	PKP1	1.43633	323	1.49558	266			Other
chr1	ENSG00000081692	JMJD4	2.12318	209	1.71235	160			Other
chr1	ENSG00000081721	DUSP12	1.08991	245	1.42278	246			Other
chr1	ENSG00000081870	HSPB11	1.17892	288	1.21521	260			Other
chr1	ENSG00000081985	IL12RB2	0.786918	265	1.22903	253			Other
chr1	ENSG00000082482	KCNK2	1.87001	191	2.01261	227			Other
chr1	ENSG00000082497	SERTAD4	1.5656	170	1.715	206			Other
chr1	ENSG00000082512	TRAF5	1.31516	317	1.37202	326			Other
chr1	ENSG00000083444	PLOD1	1.66687	267	1.52761	295			Other
chr1	ENSG00000084070	SMAP2	0.590694	453	0.614004	433			Other
chr1	ENSG00000084072	PPIE	0.978804	288	0.786035	248			Other
chr1	ENSG00000084073	ZMPSTE24	0.930554	423	0.887682	405			Other
chr1	ENSG00000084623	EIF3I	0.854062	364	1.03251	386			Other
chr1	ENSG00000084628	NKAIN1	0.89185	350	1.04536	358			Other
chr1	ENSG00000084636	COL16A1	0.916005	237	0.822002	283			Other
chr1	ENSG00000084652	TXLNA	1.14158	338	0.798845	374			Other
chr1	ENSG00000085433	WDR47	1.44041	449	1.10441	435			Other
chr1	ENSG00000085465	OVGP1	0.860055	326	0.966532	351			Other
chr1	ENSG00000085491	SLC25A24	1.36452	270	2.11239	265			Other
chr1	ENSG00000085552	IGSF9	1.26088	315	1.08459	337			Other
chr1	ENSG00000085831	TTC39A	0.993887	316	1.2119	321			Other
chr1	ENSG00000085832	EPS15	1.58634	205	1.25444	185			Other
chr1	ENSG00000085840	ORC1	1.62972	249	1.41617	249			Other
chr1	ENSG00000085998	POMGNT1	2.14499	133	1.84885	143			Other
chr1	ENSG00000085999	RAD54L	2.59326	155	2.3595	143			Other
chr1	ENSG00000086015	MAST2	2.1526	209	2.156	217			Other
chr1	ENSG00000086619	ERO1B	1.53305	335	1.12996	359			Other
chr1	ENSG00000088035	ALG6	1.59833	390	1.47693	435			Other
chr1	ENSG00000088280	ASAP3	1.36369	211	0.760005	217			Other
chr1	ENSG00000090020	SLC9A1	1.02326	454	1.14254	430			Other
chr1	ENSG00000090104	RGS1	1.77809	301	1.78956	315			Other
chr1	ENSG00000090273	NUDC	1.19356	250	1.12535	232			Other
chr1	ENSG00000090432	MUL1	1.17318	323	1.14062	280			Other
chr1	ENSG00000090621	PABPC4	1.01408	341	0.998059	372			Paternal
chr1	ENSG00000090686	USP48	1.81268	140	1.70325	163			Other
chr1	ENSG00000091483	FH	1.40773	268	1.66764	241			Other
chr1	ENSG00000092607	TBX15	1.24689	308	1.20887	267			Other
chr1	ENSG00000092621	PHGDH	2.05018	141	1.63215	163			Other
chr1	ENSG00000092847	AGO1	2.13941	242	1.85419	229			Other
chr1	ENSG00000092850	TEKT2	1.64367	199	1.53006	201			Other
chr1	ENSG00000092853	CLSPN	1.60913	147	1.98723	164			Other
chr1	ENSG00000092969	TGFB2	1.46949	332	1.41573	291			Other
chr1	ENSG00000092978	GPATCH2	1.4893	255	2.17152	228			Other
chr1	ENSG00000094963	FMO2	1.4018	275	1.45211	292			Other
chr1	ENSG00000094975	SUCO	1.51269	321	1.25368	325			Other
chr1	ENSG00000097021	ACOT7	1.80825	183	1.43305	193			Other
chr1	ENSG00000097033	SH3GLB1	1.56539	225	2.06087	194			Other
chr1	ENSG00000097046	CDC7	1.48475	358	1.37785	370			Other
chr1	ENSG00000097096	SYDE2	1.42618	243	1.46532	269			Other
chr1	ENSG00000099260	PALMD	1.40372	329	1.58304	273			Other
chr1	ENSG00000107404	DVL1	1.07479	40	0.715748	35			Other
chr1	ENSG00000116128	BCL9	1.79023	250	1.39483	274			Other
chr1	ENSG00000116132	PRRX1	1.28941	331	0.930769	314			Other
chr1	ENSG00000116133	DHCR24	1.70961	193	1.60541	191			Other
chr1	ENSG00000116138	DNAJC16	1.76268	226	1.356	257			Other
chr1	ENSG00000116141	MARK1	1.42951	291	1.58531	299			Other
chr1	ENSG00000116147	TNR	1.38594	247	1.43552	222			Other
chr1	ENSG00000116151	MORN1	1.12092	198	1.56587	206			Other
chr1	ENSG00000116157	GPX7	1.22885	283	1.03748	267			Other
chr1	ENSG00000116161	CACYBP	1.17583	305	1.31438	299			Other
chr1	ENSG00000116171	SCP2	1.21666	403	1.22237	393			Other
chr1	ENSG00000116183	PAPPA2	1.50198	122	1.5204	156			Other
chr1	ENSG00000116191	RALGPS2	1.2065	208	1.45168	225			Other
chr1	ENSG00000116194	ANGPTL1	1.37006	205	1.43562	199			Other
chr1	ENSG00000116198	CEP104	1.41736	192	1.40133	194			Other
chr1	ENSG00000116199	FAM20B	1.32682	249	1.20805	276			Other
chr1	ENSG00000116205	TCEANC2	1.32127	338	1.32053	343			Other
chr1	ENSG00000116209	TMEM59	1.32127	338	1.32053	343			Other
chr1	ENSG00000116212	LRRC42	1.15157	301	1.1949	272			Other
chr1	ENSG00000116213	WRAP73	1.53542	254	1.5075	229			Other
chr1	ENSG00000116218	NPHS2	1.7179	345	1.53488	350			Other
chr1	ENSG00000116221	MRPL37	1.13179	316	1.31307	308			Other
chr1	ENSG00000116237	ICMT	1.28384	350	1.23244	262			Other
chr1	ENSG00000116251	RPL22	1.05055	182	1.5799	168			Other
chr1	ENSG00000116254	CHD5	1.63514	194	1.69131	191			Other
chr1	ENSG00000116260	QSOX1	1.41998	308	1.30235	279			Other
chr1	ENSG00000116266	STXBP3	1.53677	393	1.42827	361			Other
chr1	ENSG00000116273	PHF13	1.81607	228	2.24516	291			Other
chr1	ENSG00000116285	ERRFI1	0.441381	146	0.643721	165			Other
chr1	ENSG00000116288	PARK7	1.64757	221	1.45232	238			Other
chr1	ENSG00000116299	KIAA1324	0.906593	449	1.10637	448			Other
chr1	ENSG00000116329	OPRD1	0.974078	376	1.10687	360			Other
chr1	ENSG00000116337	AMPD2	0.915742	245	1.37902	217			Other
chr1	ENSG00000116350	SRSF4	1.03353	410	1.19902	390			Other
chr1	ENSG00000116353	MECR	1.34888	359	0.95899	354			Other
chr1	ENSG00000116396	KCNC4	0.983064	181	1.18579	193			Other
chr1	ENSG00000116406	EDEM3	1.67422	362	1.40191	336			Other
chr1	ENSG00000116455	WDR77	0.725998	164	0.874909	153			Other
chr1	ENSG00000116459	ATP5PB	0.905661	162	0.709418	155			Other
chr1	ENSG00000116473	RAP1A	1.06387	321	1.01184	334			Other
chr1	ENSG00000116478	HDAC1	1.23514	416	1.21092	411			Other
chr1	ENSG00000116489	CAPZA1	1.26953	436	1.07486	418			Other
chr1	ENSG00000116497	S100PBP	1.03268	356	0.957134	350			Other
chr1	ENSG00000116514	RNF19B	1.28809	316	1.29714	321			Other
chr1	ENSG00000116521	SCAMP3	0.818945	403	0.678019	394			Other
chr1	ENSG00000116525	TRIM62	1.45378	229	1.52026	200			Other
chr1	ENSG00000116539	ASH1L	0.694654	270	0.741705	275			Other
chr1	ENSG00000116544	DLGAP3	1.69609	140	1.51268	109			Other
chr1	ENSG00000116560	SFPQ	2.06867	230	1.81968	169			Other
chr1	ENSG00000116574	RHOU	1.3354	228	1.31058	223			Other
chr1	ENSG00000116580	GON4L	0.973607	330	0.844682	329			Other
chr1	ENSG00000116584	ARHGEF2	0.71932	397	0.676831	373			Other
chr1	ENSG00000116586	LAMTOR2	1.16133	356	0.956634	398			Other
chr1	ENSG00000116604	MEF2D	1.79117	207	1.79759	163			Other
chr1	ENSG00000116641	DOCK7	1.4987	124	1.82053	174			Other
chr1	ENSG00000116649	SRM	1.15035	247	1.08096	257			Other
chr1	ENSG00000116661	FBXO2	0.889427	348	0.973919	359			Other
chr1	ENSG00000116663	FBXO6	0.93205	348	0.974023	387			Other
chr1	ENSG00000116667	C1orf21	1.80315	245	1.74377	256			Other
chr1	ENSG00000116668	SWT1	1.06831	376	1.23424	323			Other
chr1	ENSG00000116670	MAD2L2	0.838804	235	1.01625	244			Other
chr1	ENSG00000116675	DNAJC6	1.32598	312	1.0754	335			Other
chr1	ENSG00000116678	LEPR	2.08135	343	2.11857	262			Other
chr1	ENSG00000116679	IVNS1ABP	1.15937	225	1.27589	233			Other
chr1	ENSG00000116685	KIAA2013	1.72547	243	1.76687	267			Other
chr1	ENSG00000116688	MFN2	1.47066	237	1.56447	244			Other
chr1	ENSG00000116690	PRG4	1.63201	188	1.83103	202			Other
chr1	ENSG00000116691	MIIP	1.48087	267	1.47169	302			Other
chr1	ENSG00000116698	SMG7	1.44464	332	1.82293	361			Other
chr1	ENSG00000116701	NCF2	1.75689	183	1.82942	198			Other
chr1	ENSG00000116703	PDC	1.71055	210	1.88343	175			Other
chr1	ENSG00000116704	SLC35D1	1.09764	266	1.25953	280			Other
chr1	ENSG00000116711	PLA2G4A	1.46915	197	1.80195	220			Other
chr1	ENSG00000116717	GADD45A	1.24992	326	1.37287	293			Other
chr1	ENSG00000116721	PRAMEF1	2.54105	41	2.88916	39			Other
chr1	ENSG00000116726	PRAMEF12	2.09265	252	2.12306	224			Other
chr1	ENSG00000116729	WLS	1.42986	226	1.59104	228			Other
chr1	ENSG00000116731	PRDM2	1.58457	414	1.37073	360			Other
chr1	ENSG00000116741	RGS2	1.16598	121	1.52994	120			Other
chr1	ENSG00000116745	RPE65	1.638	413	1.22777	384			Other
chr1	ENSG00000116747	TROVE2	2.04262	250	2.12153	281			Other
chr1	ENSG00000116748	AMPD1	1.37533	303	1.26915	350			Other
chr1	ENSG00000116750	UCHL5	2.11502	215	2.17664	245			Other
chr1	ENSG00000116752	BCAS2	1.32176	354	1.43363	343			Other
chr1	ENSG00000116754	SRSF11	2.23339	245	2.02108	241			Other
chr1	ENSG00000116761	CTH	1.77607	382	1.70421	395			Other
chr1	ENSG00000116771	AGMAT	1.42456	234	1.76735	235			Other
chr1	ENSG00000116774	OLFML3	0.890411	367	0.808629	366			Other
chr1	ENSG00000116783	TNNI3K	1.31137	251	1.2061	227			Other
chr1	ENSG00000116785	CFHR3	2.19142	192	2.20457	180			Other
chr1	ENSG00000116786	PLEKHM2	1.17853	239	1.52863	216			Other
chr1	ENSG00000116791	CRYZ	1.70385	380	2.07993	355			Other
chr1	ENSG00000116793	PHTF1	1.46772	272	1.30585	269			Other
chr1	ENSG00000116809	ZBTB17	1.19047	332	1.2171	334			Other
chr1	ENSG00000116815	CD58	1.0518	218	1.0959	204			Other
chr1	ENSG00000116819	TFAP2E	1.84729	188	1.51784	174			Other
chr1	ENSG00000116824	CD2	1.31713	282	1.13289	238			Other
chr1	ENSG00000116830	TTF2	1.09645	248	1.20849	222			Other
chr1	ENSG00000116833	NR5A2	1.25824	382	1.21925	384			Other
chr1	ENSG00000116852	KIF21B	1.09589	447	1.10645	461			Other
chr1	ENSG00000116857	TMEM9	1.22897	330	1.21883	326			Other
chr1	ENSG00000116863	ADPRHL2	1.61338	153	1.05555	142			Other
chr1	ENSG00000116871	MAP7D1	2.02853	134	2.05181	128			Other
chr1	ENSG00000116874	WARS2	1.58219	218	1.50948	207			Other
chr1	ENSG00000116882	HAO2	1.0122	320	1.05619	265			Other
chr1	ENSG00000116885	OSCP1	1.29032	265	1.20586	326			Other
chr1	ENSG00000116898	MRPS15	1.51965	286	1.52136	235			Other
chr1	ENSG00000116903	EXOC8	1.46052	368	1.23622	356			Other
chr1	ENSG00000116906	GNPAT	1.43153	376	1.25876	403			Other
chr1	ENSG00000116918	TSNAX	1.405	508	1.53898	485			Other
chr1	ENSG00000116922	C1orf109	1.0395	258	1.1757	248			Other
chr1	ENSG00000116954	RRAGC	0.946335	333	0.878153	317			Other
chr1	ENSG00000116962	NID1	1.25684	423	1.04403	401			Other
chr1	ENSG00000116977	LGALS8	1.15389	356	1.05378	380			Other
chr1	ENSG00000116981	NT5C1A	0.899743	370	0.900278	343			Other
chr1	ENSG00000116983	HPCAL4	1.00097	259	0.799372	222			Other
chr1	ENSG00000116984	MTR	2.13514	265	2.0843	246			Other
chr1	ENSG00000116985	BMP8B	0.949496	268	0.642516	236			Other
chr1	ENSG00000116990	MYCL	0.808568	305	0.678559	312			Other
chr1	ENSG00000116991	SIPA1L2	1.35069	354	1.27897	311			Other
chr1	ENSG00000116996	ZP4	1.38998	280	1.26073	263			Other
chr1	ENSG00000117000	RLF	0.846424	364	0.742793	338			Other
chr1	ENSG00000117009	KMO	1.65258	235	1.49013	275			Other
chr1	ENSG00000117010	ZNF684	1.17062	446	1.03875	391			Other
chr1	ENSG00000117013	KCNQ4	1.18678	280	1.00686	306			Other
chr1	ENSG00000117016	RIMS3	1.11426	211	0.690312	180			Other
chr1	ENSG00000117020	AKT3	1.53975	148	1.63482	149			Other
chr1	ENSG00000117036	ETV3	1.77881	225	1.33242	233			Other
chr1	ENSG00000117054	ACADM	1.46655	336	1.51917	301			Other
chr1	ENSG00000117069	ST6GALNAC5	1.21464	334	1.2807	308			Other
chr1	ENSG00000117090	SLAMF1	1.39021	275	1.50436	298			Other
chr1	ENSG00000117091	CD48	1.1766	289	1.02067	315			Other
chr1	ENSG00000117114	ADGRL2	1.29607	272	1.22901	242			Other
chr1	ENSG00000117115	PADI2	1.44326	233	1.1844	245			Other
chr1	ENSG00000117118	SDHB	2.01804	175	2.11378	166			Other
chr1	ENSG00000117122	MFAP2	1.64879	222	1.62971	199			Other
chr1	ENSG00000117133	RPF1	1.26357	298	1.61694	296			Other
chr1	ENSG00000117139	KDM5B	1.2226	271	1.57936	275			Other
chr1	ENSG00000117143	UAP1	1.68317	241	1.89871	250			Other
chr1	ENSG00000117148	ACTL8	1.87007	205	1.56142	205			Other
chr1	ENSG00000117151	CTBS	1.59541	264	1.85994	266			Other
chr1	ENSG00000117152	RGS4	1.54648	282	1.48562	264			Other
chr1	ENSG00000117153	KLHL12	1.5269	288	1.60596	277			Other
chr1	ENSG00000117154	IGSF21	1.24138	239	0.966279	229			Other
chr1	ENSG00000117155	SSX2IP	1.29595	388	1.32805	405			Other
chr1	ENSG00000117174	ZNHIT6	1.54801	342	1.55902	324			Other
chr1	ENSG00000117215	PLA2G2D	1.19533	338	1.1681	325			Other
chr1	ENSG00000117222	RBBP5	1.31098	294	1.45652	302			Other
chr1	ENSG00000117226	GBP3	1.32873	352	1.2492	394			Other
chr1	ENSG00000117228	GBP1	1.41296	313	1.33727	316			Other
chr1	ENSG00000117245	KIF17	1.1795	218	1.1725	235			Other
chr1	ENSG00000117262	GPR89A	2.71648	58	3.92992	60			Other
chr1	ENSG00000117266	CDK18	1.1039	321	0.961319	292			Other
chr1	ENSG00000117280	RAB29	1.30696	227	1.45628	192			Other
chr1	ENSG00000117281	CD160	1.70418	179	1.77653	182			Other
chr1	ENSG00000117298	ECE1	0.814513	278	0.863192	328			Other
chr1	ENSG00000117305	HMGCL	1.02479	172	1.46738	200			Other
chr1	ENSG00000117308	GALE	1.30629	198	1.20245	220			Other
chr1	ENSG00000117318	ID3	1.10859	236	0.896527	221			Other
chr1	ENSG00000117322	CR2	1.3021	230	1.4594	224			Other
chr1	ENSG00000117335	CD46	1.91675	278	1.82199	262			Other
chr1	ENSG00000117360	PRPF3	0.788542	409	0.982843	448			Other
chr1	ENSG00000117362	APH1A	0.886818	406	0.916104	418			Other
chr1	ENSG00000117385	P3H1	1.0258	353	1.07938	355			Other
chr1	ENSG00000117394	SLC2A1	1.33992	268	1.73992	245			Other
chr1	ENSG00000117395	EBNA1BP2	0.96082	288	0.795107	264			Other
chr1	ENSG00000117399	CDC20	0.98907	343	0.967979	350			Other
chr1	ENSG00000117400	MPL	0.74139	312	0.996826	335			Other
chr1	ENSG00000117407	ARTN	0.7962	166	0.828485	188			Other
chr1	ENSG00000117408	IPO13	1.03524	307	1.00909	276			Other
chr1	ENSG00000117410	ATP6V0B	1.02393	191	1.1438	175			Other
chr1	ENSG00000117411	B4GALT2	0.989957	178	0.916354	170			Other
chr1	ENSG00000117419	ERI3	1.8068	263	1.55403	300			Other
chr1	ENSG00000117425	PTCH2	0.976854	325	1.11345	286			Other
chr1	ENSG00000117448	AKR1A1	1.38769	303	1.60045	279			Other
chr1	ENSG00000117450	PRDX1	1.36591	242	1.27544	241			Other
chr1	ENSG00000117461	PIK3R3	1.78882	120	1.94207	107			Other
chr1	ENSG00000117472	TSPAN1	1.98267	167	1.64001	150			Other
chr1	ENSG00000117475	BLZF1	1.02286	366	0.96205	418			Other
chr1	ENSG00000117477	CCDC181	1.04485	322	0.815249	296			Other
chr1	ENSG00000117479	SLC19A2	1.13186	400	1.21832	397			Other
chr1	ENSG00000117480	FAAH	2.23316	169	2.22758	205			Other
chr1	ENSG00000117481	NSUN4	2.55648	159	2.69972	191			Other
chr1	ENSG00000117500	TMED5	2.1499	214	1.84256	245			Other
chr1	ENSG00000117501	MROH9	1.11207	274	1.16475	271			Other
chr1	ENSG00000117505	DR1	1.72499	200	1.9953	203			Other
chr1	ENSG00000117519	CNN3	1.86938	168	1.62782	181			Other
chr1	ENSG00000117523	PRRC2C	1.62504	349	1.35934	318			Other
chr1	ENSG00000117525	F3	1.41484	221	1.48911	191			Other
chr1	ENSG00000117528	ABCD3	1.94047	257	1.93382	267			Other
chr1	ENSG00000117533	VAMP4	1.54491	297	1.41114	345			Other
chr1	ENSG00000117543	DPH5	1.22694	256	1.54421	276			Other
chr1	ENSG00000117560	FASLG	1.28048	391	1.08505	376			Other
chr1	ENSG00000117569	PTBP2	1.61172	270	1.62856	287			Other
chr1	ENSG00000117586	TNFSF4	0.980246	343	0.930991	308			Other
chr1	ENSG00000117592	PRDX6	1.16827	315	1.09126	396			Other
chr1	ENSG00000117593	DARS2	1.22414	462	1.04278	436			Other
chr1	ENSG00000117594	HSD11B1	1.39459	263	1.72114	269			Other
chr1	ENSG00000117595	IRF6	2.11512	249	1.97964	269			Other
chr1	ENSG00000117597	UTP25	2.11404	244	1.89877	261			Other
chr1	ENSG00000117598	PLPPR5	1.43171	97	1.45808	102			Other
chr1	ENSG00000117600	PLPPR4	1.40683	177	1.6472	194			Other
chr1	ENSG00000117601	SERPINC1	1.03664	343	1.06622	360			Other
chr1	ENSG00000117602	RCAN3	1.45733	295	1.07797	261			Other
chr1	ENSG00000117614	SYF2	1.08219	241	1.42798	207			Other
chr1	ENSG00000117616	RSRP1	1.10234	163	1.11983	161			Other
chr1	ENSG00000117620	SLC35A3	1.57148	289	1.35925	318			Other
chr1	ENSG00000117625	RCOR3	1.51231	246	1.87519	252			Other
chr1	ENSG00000117632	STMN1	1.11957	270	1.16386	284			Other
chr1	ENSG00000117640	MTFR1L	0.949876	206	0.94171	179			Other
chr1	ENSG00000117643	MAN1C1	0.873031	184	1.12219	198			Other
chr1	ENSG00000117650	NEK2	0.855787	410	0.843451	436			Other
chr1	ENSG00000117676	RPS6KA1	1.11036	348	1.08908	357			Other
chr1	ENSG00000117682	DHDDS	0.962797	334	0.94765	370			Other
chr1	ENSG00000117691	NENF	0.949467	412	0.948476	388			Other
chr1	ENSG00000117697	NSL1	1.05673	362	0.989675	363			Other
chr1	ENSG00000117707	PROX1	1.71073	182	1.58438	169			Other
chr1	ENSG00000117713	ARID1A	1.62501	202	1.32661	185			Other
chr1	ENSG00000117724	CENPF	1.38041	257	1.69387	274			Other
chr1	ENSG00000117748	RPA2	1.15423	323	1.00313	292			Other
chr1	ENSG00000117751	PPP1R8	0.821188	252	0.686565	258			Other
chr1	ENSG00000117758	STX12	1.15654	220	0.978584	272			Other
chr1	ENSG00000117791	MARC2	1.32509	346	1.30318	316			Other
chr1	ENSG00000117834	SLC5A9	1.60196	295	1.41883	256			Other
chr1	ENSG00000117859	OSBPL9	0.913965	431	1.16362	434			Other
chr1	ENSG00000117862	TXNDC12	1.65091	213	2.02808	226			Other
chr1	ENSG00000118193	KIF14	0.857306	482	0.934143	454			Other
chr1	ENSG00000118194	TNNT2	1.243	235	1.16712	257			Other
chr1	ENSG00000118197	DDX59	1.14702	288	1.24139	294			Other
chr1	ENSG00000118200	CAMSAP2	1.34967	228	1.17951	224			Other
chr1	ENSG00000118217	ATF6	1.29161	333	1.40897	358			Other
chr1	ENSG00000118292	C1orf54	0.815218	386	0.708718	373			Other
chr1	ENSG00000118298	CA14	0.9153	370	0.541859	362			Other
chr1	ENSG00000118454	ANKRD13C	1.97964	360	1.94843	348			Other
chr1	ENSG00000118473	SGIP1	1.25709	264	1.27382	288			Other
chr1	ENSG00000118655	DCLRE1B	0.929036	317	1.17018	343			Other
chr1	ENSG00000118729	CASQ2	0.963034	225	0.870887	213			Other
chr1	ENSG00000118733	OLFM3	1.60285	159	1.44907	159			Other
chr1	ENSG00000118873	RAB3GAP2	1.45864	295	2.06129	297			Other
chr1	ENSG00000119280	C1orf198	1.45288	382	1.21227	391			Other
chr1	ENSG00000119283	TRIM67	1.20501	247	1.48876	237			Other
chr1	ENSG00000119285	HEATR1	1.93999	266	1.56709	253			Other
chr1	ENSG00000119535	CSF3R	1.47908	232	1.75499	206			Other
chr1	ENSG00000120332	TNN	1.23141	324	1.41026	283			Other
chr1	ENSG00000120333	MRPS14	1.19392	330	1.3989	381			Other
chr1	ENSG00000120334	CENPL	1.22414	462	1.04173	435			Other
chr1	ENSG00000120337	TNFSF18	1.06538	252	1.05859	295			Other
chr1	ENSG00000120341	SEC16B	1.39754	231	1.7099	217			Other
chr1	ENSG00000120370	GORAB	1.33277	336	1.09207	291			Other
chr1	ENSG00000120656	TAF12	0.917359	359	1.06241	377			Other
chr1	ENSG00000120937	NPPB	0.987968	343	1.14289	336			Other
chr1	ENSG00000120942	UBIAD1	1.24201	279	1.38915	321			Other
chr1	ENSG00000120948	TARDBP	1.20926	282	1.28362	287			Other
chr1	ENSG00000120949	TNFRSF8	1.99782	229	1.5051	263			Other
chr1	ENSG00000120952	PRAMEF2	2.47319	135	2.4137	134			Other
chr1	ENSG00000121310	ECHDC2	1.21666	403	1.22237	393			Other
chr1	ENSG00000121446	RGSL1	1.40078	182	1.00855	179			Other
chr1	ENSG00000121454	LHX4	1.33557	175	1.28143	164			Other
chr1	ENSG00000121481	RNF2	1.40641	256	1.32692	266			Other
chr1	ENSG00000121486	TRMT1L	1.06831	376	1.23424	323			Other
chr1	ENSG00000121634	GJA8	2.20117	180	2.2244	192			Other
chr1	ENSG00000121644	DESI2	1.22866	376	1.32198	375			Other
chr1	ENSG00000121753	ADGRB2	0.929958	238	1.16362	249			Other
chr1	ENSG00000121764	HCRTR1	0.733053	233	0.989184	218			Other
chr1	ENSG00000121766	ZCCHC17	1.01663	420	1.0258	450			Other
chr1	ENSG00000121769	FABP3	0.879019	375	0.910964	386			Other
chr1	ENSG00000121774	KHDRBS1	1.00779	308	0.96109	295			Other
chr1	ENSG00000121775	TMEM39B	0.940693	417	0.787082	451			Other
chr1	ENSG00000121851	POLR3GL	1.96525	219	1.69621	191			Other
chr1	ENSG00000121900	TMEM54	1.13751	262	1.04332	279			Other
chr1	ENSG00000121903	ZSCAN20	1.24331	390	1.15404	326			Other
chr1	ENSG00000121904	CSMD2	1.4143	228	1.06005	280			Other
chr1	ENSG00000121905	HPCA	1.0394	297	1.01493	286			Other
chr1	ENSG00000121931	LRIF1	1.08114	360	1.05868	390			Other
chr1	ENSG00000121933	TMIGD3	1.18058	362	1.01719	331			Other
chr1	ENSG00000121940	CLCC1	1.28105	401	1.52472	376			Other
chr1	ENSG00000121957	GPSM2	1.35023	358	1.19964	335			Other
chr1	ENSG00000122176	FMOD	0.801939	314	0.859832	299			Other
chr1	ENSG00000122180	MYOG	1.21988	201	1.26148	229			Other
chr1	ENSG00000122188	LAX1	1.34004	387	1.0874	409			Other
chr1	ENSG00000122218	COPA	1.06571	276	1.47265	292			Other
chr1	ENSG00000122223	CD244	1.07766	451	1.16727	437			Other
chr1	ENSG00000122224	LY9	1.27089	398	1.09891	431			Other
chr1	ENSG00000122406	RPL5	1.2194	341	1.13532	314			Other
chr1	ENSG00000122417	ODF2L	1.66114	209	1.4606	228			Other
chr1	ENSG00000122420	PTGFR	1.54877	266	1.4622	289			Other
chr1	ENSG00000122432	SPATA1	1.70279	264	1.61482	300			Other
chr1	ENSG00000122435	TRMT13	1.28899	208	1.54366	227			Other
chr1	ENSG00000122477	LRRC39	1.57981	261	1.63018	269			Other
chr1	ENSG00000122481	RWDD3	2.36185	214	1.56481	179			Other
chr1	ENSG00000122482	ZNF644	1.98274	238	2.12837	239			Other
chr1	ENSG00000122483	CCDC18	2.18826	231	1.89668	276			Other
chr1	ENSG00000122484	RPAP2	1.03987	330	0.773278	345			Other
chr1	ENSG00000123080	CDKN2C	1.84396	183	2.6709	176			Other
chr1	ENSG00000123091	RNF11	2.04921	274	2.01755	257			Other
chr1	ENSG00000123472	ATPAF1	2.35192	157	2.33902	144			Other
chr1	ENSG00000123473	STIL	2.72462	294	2.2534	278			Other
chr1	ENSG00000123684	LPGAT1	1.07683	367	0.990908	352			Other
chr1	ENSG00000123685	BATF3	1.10393	438	0.950279	471			Other
chr1	ENSG00000123689	G0S2	1.81494	175	1.7645	217			Other
chr1	ENSG00000123836	PFKFB2	1.17911	249	1.11072	247			Other
chr1	ENSG00000123838	C4BPA	1.15702	334	1.15721	286			Other
chr1	ENSG00000123843	C4BPB	1.34703	432	0.950081	399			Other
chr1	ENSG00000125459	MSTO1	0.501191	290	0.866237	303			Other
chr1	ENSG00000125462	C1orf61	0.853511	243	1.0038	250			Other
chr1	ENSG00000125703	ATG4C	1.82446	357	1.61097	332			Other
chr1	ENSG00000125944	HNRNPR	1.33287	263	1.50484	260			Other
chr1	ENSG00000125945	ZNF436	1.59443	138	1.42609	150			Other
chr1	ENSG00000126067	PSMB2	1.70507	217	1.73007	194			Other
chr1	ENSG00000126070	AGO3	1.87355	145	1.7431	121			Other
chr1	ENSG00000126088	UROD	0.727684	529	0.645278	534			Other
chr1	ENSG00000126091	ST3GAL3	0.932673	260	1.11001	266			Other
chr1	ENSG00000126106	TMEM53	1.14026	400	1.24694	359			Other
chr1	ENSG00000126107	HECTD3	0.720262	489	0.643193	509			Other
chr1	ENSG00000126698	DNAJC8	0.909425	446	0.874921	487			Other
chr1	ENSG00000126705	AHDC1	0.591352	120	0.683195	132			Other
chr1	ENSG00000126709	IFI6	0.893776	209	0.990977	239			Other
chr1	ENSG00000127054	INTS11	1.33219	110	1.3118	108			Other
chr1	ENSG00000127074	RGS13	1.57125	326	1.01461	307			Other
chr1	ENSG00000127124	HIVEP3	0.964569	271	1.00816	286			Other
chr1	ENSG00000127125	PPCS	1.60771	237	1.6483	248			Other
chr1	ENSG00000127129	EDN2	1.37271	247	1.15608	256			Other
chr1	ENSG00000127423	AUNIP	1.60077	319	1.28102	297			Other
chr1	ENSG00000127463	EMC1	1.09684	363	0.974393	340			Other
chr1	ENSG00000127472	PLA2G5	1.47681	311	1.3951	342			Other
chr1	ENSG00000127481	UBR4	0.831162	410	1.15438	377			Other
chr1	ENSG00000127483	HP1BP3	2.02461	160	1.80193	142			Other
chr1	ENSG00000127603	MACF1	0.630053	358	0.642822	385			Other
chr1	ENSG00000130695	CEP85	0.949309	495	0.913567	443			Other
chr1	ENSG00000130762	ARHGEF16	1.18507	201	1.40781	207			Other
chr1	ENSG00000130764	LRRC47	1.55702	341	1.75999	308			Other
chr1	ENSG00000130766	SESN2	0.804995	560	0.752083	504			Other
chr1	ENSG00000130768	SMPDL3B	0.943029	261	0.715644	237			Other
chr1	ENSG00000130770	ATP5IF1	0.791936	408	1.00508	415			Other
chr1	ENSG00000130772	MED18	1.10074	483	1.09305	469			Other
chr1	ENSG00000130775	THEMIS2	1.14334	273	0.979653	241			Other
chr1	ENSG00000130939	UBE4B	1.20693	311	0.939342	339			Other
chr1	ENSG00000130940	CASZ1	0.762833	286	0.878623	306			Other
chr1	ENSG00000131233	GJA9	0.961596	471	0.965472	419			Other
chr1	ENSG00000131236	CAP1	1.01067	374	0.758451	383			Other
chr1	ENSG00000131238	PPT1	0.744404	461	0.740373	531			Other
chr1	ENSG00000131584	ACAP3	1.66329	69	0.818642	81			Other
chr1	ENSG00000131591	C1orf159	1.2435	150	1.19816	168			Other
chr1	ENSG00000131686	CA6	0.698153	378	0.837954	429			Other
chr1	ENSG00000131697	NPHP4	1.33756	77	1.90871	55			Other
chr1	ENSG00000131778	CHD1L	1.54691	266	1.31787	261			Other
chr1	ENSG00000131779	PEX11B	1.9178	211	2.09932	189			Other
chr1	ENSG00000131781	FMO5	1.5692	258	1.30487	253			Other
chr1	ENSG00000131788	PIAS3	1.54526	313	1.91111	309			Other
chr1	ENSG00000131791	PRKAB2	1.49835	362	1.49888	366			Other
chr1	ENSG00000131910	NR0B2	1.09544	237	0.986106	218			Other
chr1	ENSG00000131914	LIN28A	0.942956	323	0.936714	237			Other
chr1	ENSG00000132122	SPATA6	1.91878	132	2.2211	154			Other
chr1	ENSG00000132128	LRRC41	2.01974	166	2.2247	142			Other
chr1	ENSG00000132185	FCRLA	1.48426	314	1.60957	332			Other
chr1	ENSG00000132196	HSD17B7	1.67713	268	1.96546	275			Other
chr1	ENSG00000132485	ZRANB2	1.68586	220	1.99939	210			Other
chr1	ENSG00000132676	DAP3	0.843524	319	1.01354	301			Other
chr1	ENSG00000132677	RHBG	0.995434	302	0.801169	267			Other
chr1	ENSG00000132680	KHDC4	0.625812	337	0.842915	351			Other
chr1	ENSG00000132681	ATP1A4	1.04262	364	1.26156	399			Other
chr1	ENSG00000132688	NES	0.911938	252	0.851245	253			Other
chr1	ENSG00000132692	BCAN	1.25508	251	1.06113	261			Other
chr1	ENSG00000132693	CRP	1.42509	297	1.54395	303			Other
chr1	ENSG00000132694	ARHGEF11	1.29659	219	1.16651	233			Other
chr1	ENSG00000132698	RAB25	0.891961	245	1.02063	232			Other
chr1	ENSG00000132702	HAPLN2	0.958128	260	1.20838	244			Other
chr1	ENSG00000132703	APCS	1.78355	263	2.07133	271			Other
chr1	ENSG00000132704	FCRL2	1.43517	248	1.65573	262			Other
chr1	ENSG00000132716	DCAF8	1.06062	221	1.37658	216			Other
chr1	ENSG00000132718	SYT11	0.936485	343	0.832714	339			Other
chr1	ENSG00000132763	MMACHC	1.0447	271	1.44167	300			Other
chr1	ENSG00000132768	DPH2	0.958495	205	1.21142	202			Other
chr1	ENSG00000132773	TOE1	0.980727	284	0.85665	265			Other
chr1	ENSG00000132780	NASP	1.53892	250	1.53882	231			Other
chr1	ENSG00000132781	MUTYH	0.761501	229	0.86255	221			Other
chr1	ENSG00000132849	PATJ	1.34419	334	1.43999	333			Other
chr1	ENSG00000132854	KANK4	1.35965	313	1.35476	356			Other
chr1	ENSG00000132855	ANGPTL3	2.19336	187	2.11941	199			Other
chr1	ENSG00000132879	FBXO44	0.918674	352	1.06695	382			Other
chr1	ENSG00000132881	CPLANE2	1.3629	274	1.16152	280			Other
chr1	ENSG00000132906	CASP9	1.76857	230	1.31031	263			Other
chr1	ENSG00000133019	CHRM3	1.27285	225	1.3422	214			Other
chr1	ENSG00000133048	CHI3L1	1.37577	243	1.17733	217			Other
chr1	ENSG00000133055	MYBPH	1.42248	263	1.08948	255			Other
chr1	ENSG00000133056	PIK3C2B	1.37524	324	1.38604	270			Other
chr1	ENSG00000133059	DSTYK	1.26772	332	1.52135	352			Other
chr1	ENSG00000133063	CHIT1	0.984551	440	1.0034	392			Other
chr1	ENSG00000133065	SLC41A1	1.61699	279	1.19504	275			Other
chr1	ENSG00000133067	LGR6	1.50152	232	0.953391	205			Other
chr1	ENSG00000133069	TMCC2	1.32583	142	1.21819	139			Other
chr1	ENSG00000133216	EPHB2	1.16994	142	0.793142	136			Other
chr1	ENSG00000133226	SRRM1	1.13904	317	0.992813	283			Other
chr1	ENSG00000134183	GNAT2	1.09108	199	1.21804	220			Other
chr1	ENSG00000134184	GSTM1	1.22727	7	1.1045	189			Other
chr1	ENSG00000134186	PRPF38B	1.65364	312	1.71407	329			Other
chr1	ENSG00000134193	REG4	1.79425	325	1.6659	301			Other
chr1	ENSG00000134198	TSPAN2	1.46105	342	1.61206	309			Other
chr1	ENSG00000134200	TSHB	1.24895	384	1.49701	411			Other
chr1	ENSG00000134201	GSTM5	1.26854	196	1.14574	199			Other
chr1	ENSG00000134202	GSTM3	1.0556	323	1.14926	304			Other
chr1	ENSG00000134207	SYT6	1.18018	237	1.13767	250			Other
chr1	ENSG00000134215	VAV3	1.33132	375	1.33676	359			Other
chr1	ENSG00000134216	CHIA	1.02335	273	0.950545	300			Other
chr1	ENSG00000134222	PSRC1	1.11413	303	0.983522	296			Other
chr1	ENSG00000134240	HMGCS2	1.66516	219	1.65374	202			Other
chr1	ENSG00000134242	PTPN22	1.21516	194	1.46509	214			Other
chr1	ENSG00000134243	SORT1	0.946012	289	1.32867	290			Other
chr1	ENSG00000134245	WNT2B	0.796705	289	0.970174	305			Other
chr1	ENSG00000134247	PTGFRN	0.98568	202	1.10433	255			Other
chr1	ENSG00000134248	LAMTOR5	1.47085	302	1.64626	325			Other
chr1	ENSG00000134249	ADAM30	1.77066	221	1.82111	255			Other
chr1	ENSG00000134250	NOTCH2	4.75079	21	3.93111	15			Other
chr1	ENSG00000134253	TRIM45	1.21915	272	1.214	249			Other
chr1	ENSG00000134255	CEPT1	1.06397	395	0.984929	348			Other
chr1	ENSG00000134256	CD101	0.935628	313	1.28333	328			Other
chr1	ENSG00000134258	VTCN1	2.18186	184	1.39792	197			Other
chr1	ENSG00000134259	NGF	1.54884	290	1.60399	277			Other
chr1	ENSG00000134262	AP4B1	0.914813	334	1.14138	362			Other
chr1	ENSG00000134365	CFHR4	2.02939	176	1.81457	178			Other
chr1	ENSG00000134369	NAV1	1.40833	292	1.62252	289			Other
chr1	ENSG00000134371	CDC73	1.52421	367	1.66558	411			Other
chr1	ENSG00000134375	TIMM17A	1.33226	309	1.2738	326			Other
chr1	ENSG00000134376	CRB1	1.5236	230	1.49415	248			Other
chr1	ENSG00000134389	CFHR5	1.89911	181	1.71439	151			Other
chr1	ENSG00000134644	PUM1	1.21473	287	1.36183	303			Other
chr1	ENSG00000134668	SPOCD1	0.738734	380	0.649767	386			Other
chr1	ENSG00000134684	YARS	1.06686	336	0.845215	325			Other
chr1	ENSG00000134686	PHC2	1.59975	297	1.25107	329			Other
chr1	ENSG00000134690	CDCA8	0.983772	232	1.18857	226			Other
chr1	ENSG00000134697	GNL2	1.06498	366	0.921662	382			Other
chr1	ENSG00000134698	AGO4	2.03752	229	1.76631	221			Other
chr1	ENSG00000134709	HOOK1	2.07402	262	2.16221	238			Other
chr1	ENSG00000134716	CYP2J2	2.11587	192	1.6485	189			Other
chr1	ENSG00000134717	BTF3L4	1.65091	213	2.02808	226			Other
chr1	ENSG00000134744	TUT4	1.07212	211	1.37799	206			Other
chr1	ENSG00000134748	PRPF38A	1.62178	251	1.48016	254			Other
chr1	ENSG00000135744	AGT	1.59913	350	1.7003	375			Other
chr1	ENSG00000135747	ZNF670-ZNF695	1.02942	312	1.3901	308			Other
chr1	ENSG00000135749	PCNX2	1.47925	422	1.33224	388			Other
chr1	ENSG00000135750	KCNK1	1.24278	214	1.16888	230			Other
chr1	ENSG00000135763	URB2	1.47243	410	1.16378	358			Other
chr1	ENSG00000135766	EGLN1	1.37196	254	1.54873	205			Other
chr1	ENSG00000135773	CAPN9	1.58055	348	1.3882	346			Other
chr1	ENSG00000135775	COG2	1.58034	325	1.46087	296			Other
chr1	ENSG00000135776	ABCB10	1.30913	251	1.52705	271			Other
chr1	ENSG00000135778	NTPCR	1.33825	344	1.23934	364			Other
chr1	ENSG00000135801	TAF5L	1.53271	404	1.16009	353			Other
chr1	ENSG00000135821	GLUL	0.97441	298	1.00978	271			Other
chr1	ENSG00000135823	STX6	1.15577	288	1.12393	293			Other
chr1	ENSG00000135824	RGS8	1.77799	216	1.50094	234			Other
chr1	ENSG00000135828	RNASEL	0.941034	489	1.07267	505			Other
chr1	ENSG00000135829	DHX9	1.47863	314	1.98978	338			Other
chr1	ENSG00000135835	KIAA1614	1.08167	381	1.17008	395			Other
chr1	ENSG00000135837	CEP350	1.43803	453	1.39868	426			Other
chr1	ENSG00000135838	NPL	1.17622	261	1.1324	250			Other
chr1	ENSG00000135842	FAM129A	1.14302	433	1.22958	461			Other
chr1	ENSG00000135845	PIGC	1.01127	362	0.811728	339			Other
chr1	ENSG00000135862	LAMC1	0.988394	308	1.18368	265			Other
chr1	ENSG00000135870	RC3H1	1.40037	282	1.0238	280			Other
chr1	ENSG00000136628	EPRS	2.19194	217	2.38942	262			Other
chr1	ENSG00000136630	HLX	1.01656	388	1.13415	439			Other
chr1	ENSG00000136631	VPS45	0.712471	280	0.691057	259			Other
chr1	ENSG00000136634	IL10	1.19199	298	1.09366	339			Other
chr1	ENSG00000136636	KCTD3	2.15508	279	2.11992	239			Other
chr1	ENSG00000136643	RPS6KC1	1.49024	345	1.5793	353			Other
chr1	ENSG00000137936	BCAR3	1.67085	83	1.42274	81			Other
chr1	ENSG00000137941	TTLL7	1.3009	250	1.30414	246			Other
chr1	ENSG00000137942	FNBP1L	1.66625	179	1.71955	192			Other
chr1	ENSG00000137944	KYAT3	1.0381	307	1.52552	329			Other
chr1	ENSG00000137947	GTF2B	1.65243	321	1.37153	292			Other
chr1	ENSG00000137948	BRDT	1.42709	377	1.22978	383			Other
chr1	ENSG00000137955	RABGGTB	1.64347	400	1.44828	364			Other
chr1	ENSG00000137959	IFI44L	1.35664	233	1.69718	234			Other
chr1	ENSG00000137960	GIPC2	1.92312	267	2.03796	260			Other
chr1	ENSG00000137962	ARHGAP29	1.44191	341	1.4151	320			Other
chr1	ENSG00000137965	IFI44	1.78191	263	1.62032	250			Other
chr1	ENSG00000137968	SLC44A5	1.22192	236	1.24816	218			Other
chr1	ENSG00000137975	CLCA2	1.55392	308	1.58986	291			Other
chr1	ENSG00000137976	DNASE2B	1.6329	224	1.201	204			Other
chr1	ENSG00000137992	DBT	1.78686	238	1.69461	213			Other
chr1	ENSG00000137996	RTCA	1.53603	186	1.86397	167			Other
chr1	ENSG00000142224	IL19	1.16589	344	0.979677	340			Other
chr1	ENSG00000142583	SLC2A5	0.671007	310	0.950148	272			Other
chr1	ENSG00000142599	RERE	0.997432	336	0.708425	350			Other
chr1	ENSG00000142606	MMEL1	1.17297	154	1.44552	150			Other
chr1	ENSG00000142609	CFAP74	2.37107	271	2.08204	275			Other
chr1	ENSG00000142611	PRDM16	1.16493	143	1.75117	133			Other
chr1	ENSG00000142615	CELA2A	1.08531	267	0.998147	231			Other
chr1	ENSG00000142619	PADI3	2.18705	168	1.10451	167			Other
chr1	ENSG00000142621	FHAD1	1.10999	309	1.13699	320			Other
chr1	ENSG00000142623	PADI1	1.30634	220	1.25884	252			Other
chr1	ENSG00000142627	EPHA2	0.960734	179	0.770065	188			Other
chr1	ENSG00000142632	ARHGEF19	1.22004	263	1.00547	268			Other
chr1	ENSG00000142634	EFHD2	0.8882	339	1.42208	314			Other
chr1	ENSG00000142655	PEX14	0.919396	298	0.743184	295			Other
chr1	ENSG00000142657	PGD	0.632344	448	0.698824	432			Other
chr1	ENSG00000142661	MYOM3	1.11034	266	1.06524	277			Other
chr1	ENSG00000142669	SH3BGRL3	0.759627	348	0.731198	310			Other
chr1	ENSG00000142675	CNKSR1	0.954015	233	0.923775	231			Other
chr1	ENSG00000142676	RPL11	0.93144	234	1.13485	224			Other
chr1	ENSG00000142677	IL22RA1	0.970894	301	1.06034	297			Other
chr1	ENSG00000142684	ZNF593	0.975818	447	0.977198	461			Other
chr1	ENSG00000142686	C1orf216	1.9292	208	1.65377	219			Other
chr1	ENSG00000142687	KIAA0319L	1.80685	109	1.54771	111			Other
chr1	ENSG00000142694	EVA1B	1.01373	242	1.04217	245			Other
chr1	ENSG00000142698	C1orf94	1.06635	208	1.01275	249			Other
chr1	ENSG00000142700	DMRTA2	2.04936	101	2.3505	81			Other
chr1	ENSG00000142733	MAP3K6	0.762114	238	0.818054	249			Other
chr1	ENSG00000142748	FCN3	1.20304	289	1.11936	318			Other
chr1	ENSG00000142751	GPN2	1.17972	184	1.25286	182			Other
chr1	ENSG00000142765	SYTL1	1.10006	186	1.31639	199			Other
chr1	ENSG00000142784	WDTC1	1.26884	275	1.38975	270			Other
chr1	ENSG00000142789	CELA3A	1.17467	112	1.068	102			Other
chr1	ENSG00000142794	NBPF3	1.48863	298	1.21319	305			Other
chr1	ENSG00000142798	HSPG2	1.65739	176	1.30391	183			Other
chr1	ENSG00000142856	ITGB3BP	1.58323	250	1.47107	282			Other
chr1	ENSG00000142864	SERBP1	1.56383	161	1.27234	167			Other
chr1	ENSG00000142867	BCL10	1.40771	364	1.63381	391			Other
chr1	ENSG00000142871	CYR61	1.65701	226	1.72284	242			Other
chr1	ENSG00000142875	PRKACB	1.27967	220	1.34602	193			Other
chr1	ENSG00000142892	PIGK	1.25509	289	1.06152	291			Other
chr1	ENSG00000142910	TINAGL1	0.80251	257	0.663452	233			Other
chr1	ENSG00000142920	AZIN2	1.06618	350	0.786852	377			Other
chr1	ENSG00000142937	RPS8	1.081	449	1.41866	434			Other
chr1	ENSG00000142945	KIF2C	1.21378	384	1.22261	356			Other
chr1	ENSG00000142949	PTPRF	0.999987	238	0.814093	204			Other
chr1	ENSG00000142959	BEST4	0.849561	383	0.970178	371			Other
chr1	ENSG00000142961	MOB3C	2.29394	204	2.29077	189			Other
chr1	ENSG00000142973	CYP4B1	2.24763	119	2.27555	121			Other
chr1	ENSG00000143001	TMEM61	1.75897	191	1.71029	225			Other
chr1	ENSG00000143006	DMRTB1	2.06505	208	1.55549	199			Other
chr1	ENSG00000143013	LMO4	1.4309	206	1.26901	215			Other
chr1	ENSG00000143028	SYPL2	0.930154	254	1.2971	249			Other
chr1	ENSG00000143032	BARHL2	1.71109	174	1.95694	190			Other
chr1	ENSG00000143033	MTF2	1.54466	171	1.17715	167			Other
chr1	ENSG00000143036	SLC44A3	1.1174	261	1.36696	296			Other
chr1	ENSG00000143061	IGSF3	1.34466	245	1.49468	249			Other
chr1	ENSG00000143067	ZNF697	2.06102	146	1.54575	164			Other
chr1	ENSG00000143079	CTTNBP2NL	0.949864	328	1.08619	374			Other
chr1	ENSG00000143093	STRIP1	1.26195	351	1.33343	355			Other
chr1	ENSG00000143105	KCNA10	1.17972	406	0.992141	374			Other
chr1	ENSG00000143106	PSMA5	1.48622	207	1.31545	257			Other
chr1	ENSG00000143107	FNDC7	1.68427	359	1.32403	325			Other
chr1	ENSG00000143110	C1orf162	1.02613	350	1.1178	304			Other
chr1	ENSG00000143119	CD53	1.03471	377	1.15233	358			Other
chr1	ENSG00000143125	PROK1	1.01865	323	1.1404	359			Other
chr1	ENSG00000143126	CELSR2	1.01587	344	0.944352	347			Other
chr1	ENSG00000143127	ITGA10	2.01504	179	1.71214	181			Other
chr1	ENSG00000143147	GPR161	1.46155	272	1.27164	264			Other
chr1	ENSG00000143149	ALDH9A1	1.16822	496	1.43146	496			Other
chr1	ENSG00000143153	ATP1B1	0.967626	307	0.962851	275			Other
chr1	ENSG00000143155	TIPRL	1.33797	344	1.68736	393			Other
chr1	ENSG00000143156	NME7	1.02286	366	0.96205	418			Other
chr1	ENSG00000143157	POGK	1.64381	174	1.36874	128			Other
chr1	ENSG00000143158	MPC2	1.29211	301	1.49065	306			Other
chr1	ENSG00000143162	CREG1	1.08649	296	1.34962	281			Other
chr1	ENSG00000143164	DCAF6	1.41765	365	1.55858	352			Other
chr1	ENSG00000143167	GPA33	1.678	304	1.42655	256			Other
chr1	ENSG00000143171	RXRG	1.42225	376	1.44123	332			Other
chr1	ENSG00000143178	TBX19	1.19985	372	1.12613	389			Other
chr1	ENSG00000143179	UCK2	1.34368	309	1.32821	349			Other
chr1	ENSG00000143183	TMCO1	1.38212	288	1.32986	332			Other
chr1	ENSG00000143184	XCL1	0.85179	321	0.956601	305			Other
chr1	ENSG00000143185	XCL2	1.38281	304	1.50739	266			Other
chr1	ENSG00000143190	POU2F1	1.68729	143	1.70383	156			Other
chr1	ENSG00000143194	MAEL	1.37662	187	1.43655	190			Other
chr1	ENSG00000143195	ILDR2	1.41185	188	1.43655	190			Other
chr1	ENSG00000143196	DPT	1.04263	435	1.05812	469			Other
chr1	ENSG00000143198	MGST3	1.2425	310	1.19596	287			Other
chr1	ENSG00000143199	ADCY10	1.56669	213	1.52068	222			Other
chr1	ENSG00000143207	COP1	2.14992	173	2.24576	196			Other
chr1	ENSG00000143217	NECTIN4	1.27674	330	1.31086	325			Other
chr1	ENSG00000143222	UFC1	0.974175	399	1.31779	370			Other
chr1	ENSG00000143224	PPOX	1.02791	326	1.21838	346			Other
chr1	ENSG00000143226	FCGR2A	1.5693	269	1.85448	294			Other
chr1	ENSG00000143228	NUF2	1.70573	313	1.47775	303			Other
chr1	ENSG00000143248	RGS5	1.9379	197	1.76482	212			Other
chr1	ENSG00000143252	SDHC	1.09034	418	0.974802	415			Other
chr1	ENSG00000143256	PFDN2	1.0477	251	1.81628	270			Other
chr1	ENSG00000143257	NR1I3	1.14739	426	1.2695	435			Other
chr1	ENSG00000143258	USP21	1.00619	306	1.00147	279			Other
chr1	ENSG00000143278	F13B	1.97096	253	1.77169	280			Other
chr1	ENSG00000143294	PRCC	1.41243	374	1.3676	342			Other
chr1	ENSG00000143297	FCRL5	1.77317	179	1.80172	174			Other
chr1	ENSG00000143303	RRNAD1	1.16245	360	1.2564	412			Other
chr1	ENSG00000143314	MRPL24	1.01318	257	1.10675	241			Other
chr1	ENSG00000143315	PIGM	1.21547	240	1.21319	217			Other
chr1	ENSG00000143318	CASQ1	1.13616	322	0.946788	321			Other
chr1	ENSG00000143319	ISG20L2	1.22681	327	1.29294	370			Other
chr1	ENSG00000143320	CRABP2	0.993515	290	0.93667	303			Other
chr1	ENSG00000143321	HDGF	1.37845	309	1.17969	308			Other
chr1	ENSG00000143322	ABL2	1.2096	319	1.51955	320			Other
chr1	ENSG00000143324	XPR1	1.30952	205	1.09182	211			Other
chr1	ENSG00000143333	RGS16	1.28829	313	1.07801	322			Other
chr1	ENSG00000143337	TOR1AIP1	1.38651	414	1.68944	368			Other
chr1	ENSG00000143340	FAM163A	1.40938	403	1.62118	373			Other
chr1	ENSG00000143341	HMCN1	1.24799	166	1.70664	167			Other
chr1	ENSG00000143344	RGL1	1.83134	194	1.60425	186			Other
chr1	ENSG00000143353	LYPLAL1	1.70192	195	1.85167	202			Other
chr1	ENSG00000143355	LHX9	1.19772	269	1.44072	271			Other
chr1	ENSG00000143363	PRUNE1	0.669174	324	0.819646	300			Other
chr1	ENSG00000143365	RORC	0.843441	285	0.86987	280			Other
chr1	ENSG00000143367	TUFT1	0.976135	238	1.01169	262			Other
chr1	ENSG00000143368	SF3B4	0.945586	364	0.971531	359			Other
chr1	ENSG00000143369	ECM1	0.671212	323	0.691472	288			Other
chr1	ENSG00000143373	ZNF687	1.36953	173	1.33855	225			Other
chr1	ENSG00000143374	TARS2	0.714654	458	0.787438	452			Other
chr1	ENSG00000143375	CGN	0.931072	347	1.01601	343			Other
chr1	ENSG00000143376	SNX27	1.12059	327	1.16588	318			Other
chr1	ENSG00000143379	SETDB1	0.898987	384	0.871311	418			Other
chr1	ENSG00000143382	ADAMTSL4	0.703952	423	0.669488	431			Other
chr1	ENSG00000143384	MCL1	0.974027	240	0.893011	268			Other
chr1	ENSG00000143387	CTSK	0.663198	391	0.685269	392			Other
chr1	ENSG00000143390	RFX5	1.38959	283	1.4167	259			Other
chr1	ENSG00000143393	PI4KB	1.06437	224	1.29933	185			Other
chr1	ENSG00000143398	PIP5K1A	1.01078	287	1.24057	287			Other
chr1	ENSG00000143401	ANP32E	0.785849	383	0.69722	399			Other
chr1	ENSG00000143409	MINDY1	0.669174	324	0.819646	300			Other
chr1	ENSG00000143412	ANXA9	0.742141	272	0.663418	276			Other
chr1	ENSG00000143416	SELENBP1	1.17968	222	1.07226	247			Other
chr1	ENSG00000143418	CERS2	0.60207	378	0.603222	316			Other
chr1	ENSG00000143420	ENSA	0.630377	446	0.71562	421			Other
chr1	ENSG00000143434	SEMA6C	0.869037	293	0.850214	306			Other
chr1	ENSG00000143436	MRPL9	1.14921	257	1.35417	261			Other
chr1	ENSG00000143437	ARNT	0.725931	464	0.634763	451			Other
chr1	ENSG00000143442	POGZ	1.33378	359	1.33697	293			Other
chr1	ENSG00000143443	C1orf56	0.793836	399	1.00121	391			Other
chr1	ENSG00000143450	OAZ3	1.16688	253	1.35644	254			Other
chr1	ENSG00000143452	HORMAD1	0.763219	421	0.773774	383			Other
chr1	ENSG00000143457	GOLPH3L	0.740241	334	0.898063	337			Other
chr1	ENSG00000143458	GABPB2	1.07274	414	0.887254	391			Other
chr1	ENSG00000143469	SYT14	1.44355	220	1.62847	272			Other
chr1	ENSG00000143473	KCNH1	1.30548	409	1.17188	392			Other
chr1	ENSG00000143476	DTL	1.08899	301	0.727922	254			Other
chr1	ENSG00000143479	DYRK3	1.02989	195	1.14094	217			Other
chr1	ENSG00000143486	EIF2D	1.24425	267	1.23379	287			Other
chr1	ENSG00000143493	INTS7	1.08899	301	0.727922	254			Other
chr1	ENSG00000143494	VASH2	1.17281	354	1.20047	386			Other
chr1	ENSG00000143498	TAF1A	1.24582	260	1.38343	318			Other
chr1	ENSG00000143499	SMYD2	1.54939	226	1.65109	221			Other
chr1	ENSG00000143502	SUSD4	1.57803	169	1.69052	188			Other
chr1	ENSG00000143507	DUSP10	0.810818	407	0.775425	472			Other
chr1	ENSG00000143512	HHIPL2	1.37414	295	1.37616	307			Other
chr1	ENSG00000143514	TP53BP2	1.4844	229	1.53318	244			Other
chr1	ENSG00000143515	ATP8B2	0.757033	260	0.726473	241			Other
chr1	ENSG00000143520	FLG2	1.07576	241	1.24772	268			Other
chr1	ENSG00000143536	CRNN	1.49497	309	1.13808	285			Other
chr1	ENSG00000143537	ADAM15	0.683593	308	0.654689	320			Other
chr1	ENSG00000143543	JTB	0.82917	457	0.880076	477			Other
chr1	ENSG00000143545	RAB13	0.744648	408	0.849088	367			Other
chr1	ENSG00000143546	S100A8	1.36813	273	1.0408	249			Other
chr1	ENSG00000143549	TPM3	0.964358	384	0.900071	358			Other
chr1	ENSG00000143552	NUP210L	0.933035	352	0.934306	376			Other
chr1	ENSG00000143553	SNAPIN	1.13904	259	1.45462	259			Other
chr1	ENSG00000143554	SLC27A3	0.677488	225	0.820191	245			Other
chr1	ENSG00000143556	S100A7	1.32416	173	1.04901	183			Other
chr1	ENSG00000143569	UBAP2L	0.961635	333	0.900682	350			Other
chr1	ENSG00000143570	SLC39A1	0.923281	437	0.811182	420			Other
chr1	ENSG00000143575	HAX1	0.506595	362	0.60266	390			Other
chr1	ENSG00000143578	CREB3L4	0.87685	426	0.834426	414			Other
chr1	ENSG00000143590	EFNA3	0.728073	355	0.710468	368			Other
chr1	ENSG00000143595	AQP10	0.799538	255	1.02063	252			Other
chr1	ENSG00000143603	KCNN3	0.707722	381	0.757538	400			Other
chr1	ENSG00000143612	C1orf43	0.856926	296	0.871833	322			Other
chr1	ENSG00000143614	GATAD2B	1.01393	405	1.28241	376			Other
chr1	ENSG00000143621	ILF2	1.25473	244	1.04245	248			Other
chr1	ENSG00000143622	RIT1	0.682451	269	0.792201	263			Other
chr1	ENSG00000143624	INTS3	1.06188	306	1.42595	288			Other
chr1	ENSG00000143627	PKLR	0.773901	444	0.894096	424			Other
chr1	ENSG00000143630	HCN3	0.822782	364	0.694182	369			Other
chr1	ENSG00000143631	FLG	1.31452	128	1.54943	110			Other
chr1	ENSG00000143632	ACTA1	1.29968	250	1.47773	254			Other
chr1	ENSG00000143633	C1orf131	1.43153	376	1.25876	403			Other
chr1	ENSG00000143641	GALNT2	1.33665	225	1.52069	241			Other
chr1	ENSG00000143643	TTC13	1.51734	441	1.64453	378			Other
chr1	ENSG00000143653	SCCPDH	1.5041	254	1.37796	236			Other
chr1	ENSG00000143669	LYST	1.14883	333	1.24431	339			Other
chr1	ENSG00000143674	MAP3K21	1.32011	408	1.50287	414			Other
chr1	ENSG00000143702	CEP170	1.74401	248	1.53964	283			Other
chr1	ENSG00000143740	SNAP47	1.63968	165	2.33953	134			Other
chr1	ENSG00000143742	SRP9	1.09767	438	1.16577	434			Other
chr1	ENSG00000143748	NVL	1.07697	309	0.981786	288			Other
chr1	ENSG00000143751	SDE2	1.88143	234	1.91685	243			Other
chr1	ENSG00000143753	DEGS1	1.41973	364	1.21473	342			Other
chr1	ENSG00000143756	FBXO28	0.994386	337	0.955285	384			Other
chr1	ENSG00000143761	ARF1	1.64597	182	1.9887	189			Other
chr1	ENSG00000143768	LEFTY2	1.1112	125	1.17023	142			Other
chr1	ENSG00000143771	CNIH4	1.30036	346	0.936464	364			Other
chr1	ENSG00000143772	ITPKB	1.25257	328	1.27181	322			Other
chr1	ENSG00000143774	GUK1	2.02295	244	1.48488	258			Other
chr1	ENSG00000143776	CDC42BPA	1.58533	170	1.76418	205			Other
chr1	ENSG00000143786	CNIH3	1.19526	273	1.30061	285			Other
chr1	ENSG00000143793	C1orf35	1.89808	212	1.45819	202			Other
chr1	ENSG00000143799	PARP1	1.5079	217	1.52564	244			Other
chr1	ENSG00000143801	PSEN2	1.24658	379	1.49674	359			Other
chr1	ENSG00000143811	PYCR2	1.0257	253	1.1387	248			Other
chr1	ENSG00000143815	LBR	1.67548	246	1.61913	247			Other
chr1	ENSG00000143816	WNT9A	1.76	174	1.2249	182			Other
chr1	ENSG00000143819	EPHX1	1.14081	449	1.26291	413			Other
chr1	ENSG00000143839	REN	0.85513	269	0.850871	287			Other
chr1	ENSG00000143842	SOX13	1.17728	371	1.1572	374			Other
chr1	ENSG00000143845	ETNK2	0.951498	272	0.87699	276			Other
chr1	ENSG00000143847	PPFIA4	0.887762	297	1.06754	296			Other
chr1	ENSG00000143850	PLEKHA6	1.09058	312	1.08543	293			Other
chr1	ENSG00000143851	PTPN7	1.18785	245	1.06092	210			Other
chr1	ENSG00000143858	SYT2	0.853032	250	0.720157	280			Other
chr1	ENSG00000143862	ARL8A	1.16538	393	0.971357	350			Other
chr1	ENSG00000146463	ZMYM4	2.11187	191	2.01312	178			Other
chr1	ENSG00000149527	PLCH2	0.904202	203	0.812019	201			Other
chr1	ENSG00000150337	FCGR1A	6.65923	16	4.12121	11			Other
chr1	ENSG00000150681	RGS18	1.36287	216	1.71157	264			Other
chr1	ENSG00000151414	NEK7	1.29638	314	1.19742	344			Other
chr1	ENSG00000151418	ATP6V1G3	1.28877	332	1.16298	306			Other
chr1	ENSG00000152061	RABGAP1L	1.12986	369	1.20067	359			Other
chr1	ENSG00000152078	TMEM56	1.91892	272	1.88997	218			Other
chr1	ENSG00000152092	ASTN1	1.67934	247	1.53497	248			Other
chr1	ENSG00000152104	PTPN14	1.36236	304	1.33953	276			Other
chr1	ENSG00000152332	UHMK1	1.40215	249	1.61528	255			Other
chr1	ENSG00000152382	TADA1	1.60024	257	1.44887	285			Other
chr1	ENSG00000152760	TCTEX1D1	1.29987	260	1.03641	276			Other
chr1	ENSG00000152763	WDR78	1.73712	292	1.8491	295			Other
chr1	ENSG00000152904	GGPS1	0.94499	340	1.13469	316			Other
chr1	ENSG00000153029	MR1	1.12534	324	1.07989	330			Other
chr1	ENSG00000153187	HNRNPU	1.3852	375	1.29649	379			Other
chr1	ENSG00000153207	AHCTF1	1.23686	346	1.39958	351			Other
chr1	ENSG00000153230	OR14K1	1.53068	227	1.86803	216			Other
chr1	ENSG00000153363	LINC00467	1.49968	193	1.36379	233			Other
chr1	ENSG00000153898	MCOLN2	1.50275	411	1.73002	395			Other
chr1	ENSG00000153904	DDAH1	1.64629	227	1.76751	253			Other
chr1	ENSG00000153936	HS2ST1	1.78451	230	1.8299	244			Other
chr1	ENSG00000154007	ASB17	1.4384	266	1.51682	236			Other
chr1	ENSG00000154027	AK5	1.35763	188	1.51571	196			Other
chr1	ENSG00000154222	CC2D1B	1.66043	156	1.48071	174			Other
chr1	ENSG00000154305	MIA3	1.27338	254	1.35662	262			Other
chr1	ENSG00000154309	DISP1	2.31842	253	1.63051	239			Other
chr1	ENSG00000154342	WNT3A	1.3347	109	1.50106	106			Other
chr1	ENSG00000154358	OBSCN	1.38594	158	1.65254	162			Other
chr1	ENSG00000154370	TRIM11	2.08965	194	1.84868	161			Other
chr1	ENSG00000154380	ENAH	1.5566	254	1.31683	275			Other
chr1	ENSG00000154429	CCSAP	1.67492	408	1.44161	377			Other
chr1	ENSG00000154451	GBP5	1.28603	334	1.10409	321			Other
chr1	ENSG00000154511	FAM69A	1.13583	342	1.21363	342			Other
chr1	ENSG00000155363	MOV10	0.93283	216	1.07657	189			Other
chr1	ENSG00000155366	RHOC	0.995825	352	0.772875	341			Other
chr1	ENSG00000155367	PPM1J	0.969755	269	0.82967	298			Other
chr1	ENSG00000155380	SLC16A1	1.40612	324	1.50745	269			Other
chr1	ENSG00000155761	SPAG17	1.4991	214	1.52547	184			Other
chr1	ENSG00000155816	FMN2	1.68248	285	1.50262	265			Other
chr1	ENSG00000156097	GPR61	0.805676	326	0.908433	337			Other
chr1	ENSG00000156150	ALX3	1.27548	388	1.31017	398			Other
chr1	ENSG00000156171	DRAM2	1.04664	412	0.979145	373			Other
chr1	ENSG00000156869	FRRS1	1.85834	268	1.71504	237			Other
chr1	ENSG00000156875	MFSD14A	1.83018	215	1.25318	233			Other
chr1	ENSG00000156876	SASS6	1.41343	221	1.48956	241			Other
chr1	ENSG00000157060	SHCBP1L	1.00386	361	1.16879	300			Other
chr1	ENSG00000157064	NMNAT2	1.23664	365	1.25912	366			Other
chr1	ENSG00000157077	ZFYVE9	1.54556	188	1.62517	207			Other
chr1	ENSG00000157131	C8A	1.16045	409	1.44206	371			Other
chr1	ENSG00000157181	ODR4	2.61185	202	2.13534	198			Other
chr1	ENSG00000157184	CPT2	1.18437	381	1.29861	386			Other
chr1	ENSG00000157191	NECAP2	1.28699	370	1.26703	338			Other
chr1	ENSG00000157193	LRP8	1.61619	300	1.53214	306			Other
chr1	ENSG00000157211	CDCP2	0.991429	439	1.15642	413			Other
chr1	ENSG00000157216	SSBP3	1.12872	375	1.21343	388			Other
chr1	ENSG00000157330	C1orf158	2.5289	129	2.04496	149			Other
chr1	ENSG00000157870	PRXL2B	1.2738	210	1.64241	201			Other
chr1	ENSG00000157873	TNFRSF14	1.28954	94	0.885393	84			Other
chr1	ENSG00000157881	PANK4	1.03714	172	1.39716	161			Other
chr1	ENSG00000157911	PEX10	1.01245	237	1.15731	227			Other
chr1	ENSG00000157916	RER1	1.13442	193	1.57179	199			Other
chr1	ENSG00000157933	SKI	1.02356	138	1.89887	164			Other
chr1	ENSG00000157978	LDLRAP1	1.22525	293	1.10475	277			Other
chr1	ENSG00000158006	PAFAH2	0.883742	404	0.890073	390			Other
chr1	ENSG00000158008	EXTL1	1.04306	352	0.933431	340			Other
chr1	ENSG00000158014	SLC30A2	0.98891	360	0.971763	378			Other
chr1	ENSG00000158022	TRIM63	1.00851	271	1.05971	246			Other
chr1	ENSG00000158055	GRHL3	1.10471	334	0.944859	306			Other
chr1	ENSG00000158062	UBXN11	0.895422	427	0.859311	371			Other
chr1	ENSG00000158109	TPRG1L	1.41541	340	1.12965	270			Other
chr1	ENSG00000158156	XKR8	0.828002	288	0.67907	298			Other
chr1	ENSG00000158161	EYA3	0.812967	525	0.607648	551			Other
chr1	ENSG00000158195	WASF2	1.29901	148	1.60103	139			Other
chr1	ENSG00000158246	TENT5B	1.17841	215	0.845868	148			Other
chr1	ENSG00000158286	RNF207	1.37758	208	1.40806	208			Other
chr1	ENSG00000158292	GPR153	1.58866	125	1.40978	116			Other
chr1	ENSG00000158315	RHBDL2	1.02735	433	1.03732	437			Other
chr1	ENSG00000158473	CD1D	1.44773	376	1.49124	345			Other
chr1	ENSG00000158477	CD1A	1.45438	160	1.39341	190			Other
chr1	ENSG00000158481	CD1C	1.79248	290	1.66064	275			Other
chr1	ENSG00000158485	CD1B	1.52437	150	1.8424	144			Other
chr1	ENSG00000158488	CD1E	1.4128	214	1.49883	190			Other
chr1	ENSG00000158615	PPP1R15B	0.936685	310	1.17697	276			Other
chr1	ENSG00000158710	TAGLN2	1.2901	242	1.34323	216			Other
chr1	ENSG00000158711	ELK4	1.27705	356	1.14705	318			Other
chr1	ENSG00000158714	SLAMF8	1.45769	340	1.48668	326			Other
chr1	ENSG00000158715	SLC45A3	0.97188	287	1.01554	309			Other
chr1	ENSG00000158716	DUSP23	1.14191	321	1.36674	287			Other
chr1	ENSG00000158747	NBL1	1.07859	428	1.22851	429			Other
chr1	ENSG00000158748	HTR6	0.897406	389	0.67782	417			Other
chr1	ENSG00000158764	ITLN2	0.772893	304	0.871073	307			Other
chr1	ENSG00000158769	F11R	1.13391	275	1.31223	328			Other
chr1	ENSG00000158773	USF1	1.30183	240	1.52314	239			Other
chr1	ENSG00000158786	PLA2G2F	1.07314	284	0.852059	277			Other
chr1	ENSG00000158793	NIT1	1.0477	251	1.81628	270			Other
chr1	ENSG00000158796	DEDD	0.792455	341	1.03933	323			Other
chr1	ENSG00000158816	VWA5B1	1.28583	291	1.36385	268			Other
chr1	ENSG00000158825	CDA	1.15529	394	1.05149	364			Other
chr1	ENSG00000158828	PINK1	0.951381	247	1.11515	215			Other
chr1	ENSG00000158850	B4GALT3	1.11967	316	1.2075	344			Other
chr1	ENSG00000158859	ADAMTS4	0.957418	322	0.871389	339			Other
chr1	ENSG00000158864	NDUFS2	0.89983	291	0.828867	270			Other
chr1	ENSG00000158869	FCER1G	1.13465	385	1.07722	373			Other
chr1	ENSG00000158874	APOA2	0.961742	484	0.90586	502			Other
chr1	ENSG00000158882	TOMM40L	0.83667	473	0.922146	544			Other
chr1	ENSG00000158887	MPZ	1.03189	351	1.00557	382			Other
chr1	ENSG00000158966	CACHD1	1.70621	144	1.48559	138			Other
chr1	ENSG00000159023	EPB41	0.89415	314	0.889831	339			Other
chr1	ENSG00000159164	SV2A	1.07497	249	0.966128	247			Other
chr1	ENSG00000159166	LAD1	1.3808	317	1.42082	297			Other
chr1	ENSG00000159173	TNNI1	1.46549	216	1.19958	193			Other
chr1	ENSG00000159176	CSRP1	1.191	371	1.65255	344			Other
chr1	ENSG00000159189	C1QC	1.27707	203	0.902484	171			Other
chr1	ENSG00000159208	CIART	0.786808	443	0.568719	452			Other
chr1	ENSG00000159214	CCDC24	1.11093	280	1.22971	292			Other
chr1	ENSG00000159339	PADI4	1.32098	226	1.32639	225			Other
chr1	ENSG00000159346	ADIPOR1	1.44036	300	1.69935	287			Other
chr1	ENSG00000159348	CYB5R1	1.56179	302	1.19565	289			Other
chr1	ENSG00000159352	PSMD4	1.24883	245	1.0234	231			Other
chr1	ENSG00000159363	ATP13A2	1.71623	292	1.89345	240			Other
chr1	ENSG00000159377	PSMB4	1.31419	289	1.00837	273			Other
chr1	ENSG00000159388	BTG2	1.18845	294	1.20005	290			Other
chr1	ENSG00000159409	CELF3	1.01796	241	1.23654	234			Other
chr1	ENSG00000159423	ALDH4A1	0.927016	349	1.04004	344			Other
chr1	ENSG00000159445	THEM4	1.23721	255	1.17529	247			Other
chr1	ENSG00000159450	TCHH	1.2631	254	1.4256	266			Other
chr1	ENSG00000159455	LCE2B	1.29877	215	1.22352	210			Other
chr1	ENSG00000159479	MED8	1.20186	485	0.967421	438			Other
chr1	ENSG00000159516	SPRR2G	1.31237	324	0.970165	300			Other
chr1	ENSG00000159527	PGLYRP3	1.38145	317	0.976605	323			Other
chr1	ENSG00000159588	CCDC17	1.50958	221	1.27245	213			Other
chr1	ENSG00000159592	GPBP1L1	1.82846	185	2.51827	166			Other
chr1	ENSG00000159596	TMEM69	1.67091	167	2.59262	159			Other
chr1	ENSG00000159658	EFCAB14	2.23206	176	2.19502	177			Other
chr1	ENSG00000160049	DFFA	0.90572	287	0.667947	276			Other
chr1	ENSG00000160050	CCDC28B	0.787374	333	0.716647	314			Other
chr1	ENSG00000160051	IQCC	0.698394	396	0.777798	362			Other
chr1	ENSG00000160055	TMEM234	0.891165	377	1.03715	405			Other
chr1	ENSG00000160058	BSDC1	0.97513	238	1.00885	285			Other
chr1	ENSG00000160062	ZBTB8A	0.765967	411	0.872131	420			Other
chr1	ENSG00000160072	ATAD3B	1.66778	184	1.53646	142			Other
chr1	ENSG00000160075	SSU72	1.18304	302	1.08938	321			Other
chr1	ENSG00000160087	UBE2J2	1.23161	114	1.80354	129			Other
chr1	ENSG00000160094	ZNF362	1.43238	286	1.21813	282			Other
chr1	ENSG00000160097	FNDC5	0.788427	235	0.818917	232			Other
chr1	ENSG00000160678	S100A1	1.11555	285	1.19314	285			Other
chr1	ENSG00000160679	CHTOP	1.41107	293	1.34589	296			Other
chr1	ENSG00000160685	ZBTB7B	0.748085	217	0.738992	189			Other
chr1	ENSG00000160688	FLAD1	0.963641	404	1.0961	363			Other
chr1	ENSG00000160691	SHC1	1.33113	292	0.945727	281			Other
chr1	ENSG00000160710	ADAR	0.95482	253	0.906292	261			Other
chr1	ENSG00000160712	IL6R	0.95401	343	0.865107	342			Other
chr1	ENSG00000160714	UBE2Q1	0.768987	390	0.639555	369			Other
chr1	ENSG00000160716	CHRNB2	0.914838	295	0.671711	315			Other
chr1	ENSG00000160741	CRTC2	0.905226	307	1.12939	294			Other
chr1	ENSG00000160752	FDPS	0.83675	374	0.827909	376			Other
chr1	ENSG00000160753	RUSC1	0.594006	275	0.852514	279			Other
chr1	ENSG00000160767	FAM189B	0.672346	324	0.639719	288			Other
chr1	ENSG00000160781	PAQR6	0.850479	191	1.16128	154			Other
chr1	ENSG00000160783	PMF1	1.20959	304	1.24808	309			Other
chr1	ENSG00000160785	SLC25A44	0.75221	418	1.10409	403			Other
chr1	ENSG00000160789	LMNA	0.784167	274	0.979245	269			Other
chr1	ENSG00000160803	UBQLN4	1.11138	402	1.02784	439			Other
chr1	ENSG00000160818	GPATCH4	1.37025	200	1.35143	212			Other
chr1	ENSG00000160838	LRRC71	1.08282	336	0.973424	341			Other
chr1	ENSG00000160856	FCRL3	1.25075	197	1.56695	225			Other
chr1	ENSG00000162365	CYP4A22	1.87249	107	2.71354	85			Other
chr1	ENSG00000162366	PDZK1IP1	1.80277	270	1.58748	268			Other
chr1	ENSG00000162367	TAL1	1.73777	312	1.7157	307			Other
chr1	ENSG00000162368	CMPK1	2.37392	256	2.32896	243			Other
chr1	ENSG00000162373	BEND5	1.27162	128	1.65519	164			Other
chr1	ENSG00000162374	ELAVL4	1.4853	220	1.67638	213			Other
chr1	ENSG00000162377	COA7	0.906454	424	0.956118	428			Other
chr1	ENSG00000162378	ZYG11B	0.860348	379	0.913897	393			Other
chr1	ENSG00000162383	SLC1A7	1.2288	337	1.28085	318			Other
chr1	ENSG00000162384	C1orf123	1.35671	366	1.25089	337			Other
chr1	ENSG00000162385	MAGOH	1.52781	322	1.40462	332			Other
chr1	ENSG00000162390	ACOT11	1.20765	355	1.20869	342			Other
chr1	ENSG00000162391	FAM151A	1.47739	384	1.49241	397			Other
chr1	ENSG00000162396	PARS2	1.4553	398	1.05166	392			Other
chr1	ENSG00000162398	LEXM	1.19929	177	1.2787	168			Other
chr1	ENSG00000162399	BSND	1.45737	268	1.56554	295			Other
chr1	ENSG00000162402	USP24	1.5908	180	1.49903	169			Other
chr1	ENSG00000162407	PLPP3	1.18306	306	1.07595	282			Other
chr1	ENSG00000162408	NOL9	1.47378	321	1.27083	294			Other
chr1	ENSG00000162409	PRKAA2	1.18306	306	1.07595	282			Other
chr1	ENSG00000162413	KLHL21	1.75733	209	2.11707	268			Other
chr1	ENSG00000162415	ZSWIM5	0.984598	347	0.910982	302			Other
chr1	ENSG00000162419	GMEB1	1.16665	456	1.00334	426			Other
chr1	ENSG00000162426	SLC45A1	0.669015	404	0.765231	420			Other
chr1	ENSG00000162430	SELENON	1.09833	244	1.04044	234			Other
chr1	ENSG00000162433	AK4	1.64731	249	1.53384	243			Other
chr1	ENSG00000162434	JAK1	1.77251	186	1.70792	204			Other
chr1	ENSG00000162437	RAVER2	1.30525	231	1.54123	225			Other
chr1	ENSG00000162438	CTRC	1.63321	281	1.56873	274			Other
chr1	ENSG00000162441	LZIC	0.705865	314	0.992417	309			Other
chr1	ENSG00000162444	RBP7	1.57203	310	1.57103	281			Other
chr1	ENSG00000162456	KNCN	2.1243	143	2.13403	156			Other
chr1	ENSG00000162458	FBLIM1	0.877454	307	0.906902	317			Other
chr1	ENSG00000162460	TMEM82	0.864054	233	0.813776	235			Other
chr1	ENSG00000162461	SLC25A34	1.12461	168	1.35105	168			Other
chr1	ENSG00000162482	AKR7A3	1.11488	393	1.14191	375			Other
chr1	ENSG00000162490	DRAXIN	0.838804	235	1.01625	244			Other
chr1	ENSG00000162493	PDPN	1.52715	287	1.44311	313			Other
chr1	ENSG00000162494	LRRC38	1.23495	234	1.31863	241			Other
chr1	ENSG00000162496	DHRS3	1.073	324	1.01254	374			Other
chr1	ENSG00000162510	MATN1	1.02167	241	1.01493	227			Other
chr1	ENSG00000162511	LAPTM5	1.67706	258	1.60142	286			Other
chr1	ENSG00000162512	SDC3	0.867349	383	1.05656	369			Other
chr1	ENSG00000162517	PEF1	1.15343	270	0.974315	281			Other
chr1	ENSG00000162520	SYNC	0.906284	167	0.989885	189			Other
chr1	ENSG00000162521	RBBP4	1.42355	334	0.93017	348			Other
chr1	ENSG00000162522	KIAA1522	0.909551	354	0.743491	365			Other
chr1	ENSG00000162526	TSSK3	0.99421	262	0.968339	242			Other
chr1	ENSG00000162542	TMCO4	1.19343	278	1.10839	312			Other
chr1	ENSG00000162543	UBXN10	0.887327	316	0.863605	364			Other
chr1	ENSG00000162545	CAMK2N1	1.15997	283	1.03906	272			Other
chr1	ENSG00000162551	ALPL	1.11079	311	1.16923	291			Other
chr1	ENSG00000162552	WNT4	0.944376	213	0.777667	216			Other
chr1	ENSG00000162571	TTLL10	1.66589	114	1.54691	98			Other
chr1	ENSG00000162572	SCNN1D	2.0407	123	1.99095	132			Other
chr1	ENSG00000162576	MXRA8	1.06333	134	1.44876	110			Other
chr1	ENSG00000162585	FAAP20	1.90985	143	1.61302	115			Other
chr1	ENSG00000162591	MEGF6	1.23502	166	1.35601	164			Other
chr1	ENSG00000162592	CCDC27	1.47473	357	1.40053	338			Other
chr1	ENSG00000162594	IL23R	1.09907	393	1.22713	357			Other
chr1	ENSG00000162595	DIRAS3	1.64755	214	1.42283	182			Paternal
chr1	ENSG00000162598	C1orf87	1.73746	324	1.80122	346			Other
chr1	ENSG00000162599	NFIA	1.4897	220	1.49303	235			Other
chr1	ENSG00000162600	OMA1	1.20291	415	1.25708	411			Other
chr1	ENSG00000162601	MYSM1	1.14477	409	1.39498	433			Other
chr1	ENSG00000162604	TM2D1	1.60363	446	1.76693	455			Other
chr1	ENSG00000162607	USP1	1.6536	260	1.86245	263			Other
chr1	ENSG00000162613	FUBP1	1.94404	258	1.95641	252			Other
chr1	ENSG00000162614	NEXN	1.85391	181	1.56512	179			Other
chr1	ENSG00000162616	DNAJB4	1.94404	258	1.97126	250			Other
chr1	ENSG00000162618	ADGRL4	1.30559	288	1.37359	281			Other
chr1	ENSG00000162620	LRRIQ3	1.4728	274	1.77255	291			Other
chr1	ENSG00000162621	LRRC53	1.36261	349	1.54106	295			Other
chr1	ENSG00000162623	TYW3	1.73241	358	2.10179	336			Other
chr1	ENSG00000162624	LHX8	1.83968	163	1.55149	160			Other
chr1	ENSG00000162627	SNX7	1.74816	313	1.78161	259			Other
chr1	ENSG00000162630	B3GALT2	1.43013	234	1.38148	272			Other
chr1	ENSG00000162631	NTNG1	1.17643	359	1.1664	338			Other
chr1	ENSG00000162636	FAM102B	1.56659	183	1.61493	198			Other
chr1	ENSG00000162639	HENMT1	1.33461	233	1.70105	257			Other
chr1	ENSG00000162641	AKNAD1	1.17538	339	1.16941	331			Other
chr1	ENSG00000162642	C1orf52	1.38393	351	1.16691	356			Other
chr1	ENSG00000162643	WDR63	1.30465	310	1.56539	326			Other
chr1	ENSG00000162645	GBP2	1.25334	239	1.19652	251			Other
chr1	ENSG00000162650	ATXN7L2	1.26342	224	1.20641	215			Other
chr1	ENSG00000162654	GBP4	1.28007	358	1.56256	355			Other
chr1	ENSG00000162664	ZNF326	1.38057	323	1.32849	341			Other
chr1	ENSG00000162669	HFM1	1.22079	155	1.48961	170			Other
chr1	ENSG00000162670	BRINP3	1.50598	261	1.3311	251			Other
chr1	ENSG00000162676	GFI1	1.2041	338	1.13625	275			Other
chr1	ENSG00000162687	KCNT2	1.98015	107	1.84379	118			Other
chr1	ENSG00000162688	AGL	1.35487	334	1.36926	346			Other
chr1	ENSG00000162692	VCAM1	1.62606	340	1.57661	316			Other
chr1	ENSG00000162694	EXTL2	1.20796	294	1.31699	300			Other
chr1	ENSG00000162695	SLC30A7	1.20796	294	1.31699	300			Other
chr1	ENSG00000162702	ZNF281	1.32351	263	1.3536	266			Other
chr1	ENSG00000162704	ARPC5	1.80489	212	1.63276	200			Other
chr1	ENSG00000162706	CADM3	1.38415	238	1.51247	234			Other
chr1	ENSG00000162711	NLRP3	1.6236	318	1.78234	324			Other
chr1	ENSG00000162714	ZNF496	1.25193	277	1.47844	253			Other
chr1	ENSG00000162722	TRIM58	1.37495	209	1.68707	247			Other
chr1	ENSG00000162723	SLAMF9	1.40298	406	1.32297	414			Other
chr1	ENSG00000162727	OR2M5	1.92824	170	1.69302	169			Other
chr1	ENSG00000162728	KCNJ9	0.991811	393	1.33049	418			Other
chr1	ENSG00000162729	IGSF8	1.2528	371	1.17976	350			Other
chr1	ENSG00000162733	DDR2	1.48794	316	1.51751	325			Other
chr1	ENSG00000162734	PEA15	1.38072	265	1.29506	264			Other
chr1	ENSG00000162735	PEX19	1.31511	184	0.947837	163			Other
chr1	ENSG00000162736	NCSTN	1.00633	265	1.44327	284			Other
chr1	ENSG00000162738	VANGL2	0.843773	347	0.971886	318			Other
chr1	ENSG00000162739	SLAMF6	1.48447	181	1.86707	163			Other
chr1	ENSG00000162745	OLFML2B	1.45691	202	1.5399	199			Other
chr1	ENSG00000162746	FCRLB	1.50166	290	1.41471	288			Other
chr1	ENSG00000162747	FCGR3B	1.04307	31	2.49217	35			Other
chr1	ENSG00000162753	SLC9C2	1.42731	230	1.25853	242			Other
chr1	ENSG00000162755	KLHDC9	0.792686	281	0.898407	260			Other
chr1	ENSG00000162757	C1orf74	2.23512	200	2.19825	204			Other
chr1	ENSG00000162761	LMX1A	1.34859	304	1.37992	282			Other
chr1	ENSG00000162763	LRRC52	1.61797	224	1.41896	234			Other
chr1	ENSG00000162769	FLVCR1	1.11697	444	1.10267	420			Other
chr1	ENSG00000162771	FAM71A	1.15772	323	1.09146	324			Other
chr1	ENSG00000162772	ATF3	1.00789	453	1.33217	408			Other
chr1	ENSG00000162775	RBM15	1.42334	274	1.40807	231			Other
chr1	ENSG00000162777	DENND2D	1.146	286	1.139	265			Other
chr1	ENSG00000162779	AXDND1	1.25366	461	1.10031	444			Other
chr1	ENSG00000162782	TDRD5	1.6329	238	1.51861	213			Other
chr1	ENSG00000162783	IER5	1.0028	386	0.99294	347			Other
chr1	ENSG00000162813	BPNT1	2.67467	302	2.30615	298			Other
chr1	ENSG00000162814	SPATA17	1.49122	254	2.17078	229			Other
chr1	ENSG00000162817	C1orf115	1.40127	319	1.36112	304			Other
chr1	ENSG00000162819	BROX	1.8448	304	1.52145	292			Other
chr1	ENSG00000162825	NBPF20	2.05572	17	2.81793	27			Other
chr1	ENSG00000162836	ACP6	1.94519	236	1.95611	237			Other
chr1	ENSG00000162843	WDR64	1.27479	346	1.42434	355			Other
chr1	ENSG00000162849	KIF26B	0.804366	473	0.73569	481			Other
chr1	ENSG00000162851	TFB2M	1.49169	298	1.51208	263			Other
chr1	ENSG00000162852	CNST	1.452	281	1.52768	246			Other
chr1	ENSG00000162873	KLHDC8A	0.874615	360	1.11738	375			Other
chr1	ENSG00000162877	PM20D1	1.40201	270	1.37109	239			Other
chr1	ENSG00000162885	B3GALNT2	0.974841	356	1.05263	366			Other
chr1	ENSG00000162889	MAPKAPK2	1.46636	270	1.45745	284			Other
chr1	ENSG00000162891	IL20	1.28233	327	1.0507	349			Other
chr1	ENSG00000162892	IL24	1.26721	216	1.06279	227			Other
chr1	ENSG00000162894	FCMR	1.2667	344	1.47275	340			Other
chr1	ENSG00000162896	PIGR	1.07847	392	1.07561	355			Other
chr1	ENSG00000162897	FCAMR	0.977142	400	1.02468	377			Other
chr1	ENSG00000162909	CAPN2	0.891907	335	0.929583	343			Other
chr1	ENSG00000162910	MRPL55	1.56942	204	1.64871	226			Other
chr1	ENSG00000162923	WDR26	0.944873	302	1.14234	299			Other
chr1	ENSG00000162931	TRIM17	1.66037	197	1.52155	189			Other
chr1	ENSG00000162946	DISC1	1.45322	399	1.4447	373			Other
chr1	ENSG00000163041	H3F3A	1.42967	283	1.76374	297			Other
chr1	ENSG00000163050	COQ8A	1.36205	344	1.31703	353			Other
chr1	ENSG00000163125	RPRD2	0.878779	410	0.935245	437			Other
chr1	ENSG00000163131	CTSS	0.744654	276	1.12742	304			Other
chr1	ENSG00000163141	BNIPL	0.905128	437	0.787744	447			Other
chr1	ENSG00000163154	TNFAIP8L2	1.00158	375	1.05294	396			Other
chr1	ENSG00000163155	LYSMD1	1.67982	244	1.1891	298			Other
chr1	ENSG00000163156	SCNM1	1.0024	356	1.04613	384			Other
chr1	ENSG00000163157	TMOD4	0.988192	326	1.19394	324			Other
chr1	ENSG00000163159	VPS72	1.00261	316	1.07505	299			Other
chr1	ENSG00000163191	S100A11	1.30458	334	1.57204	304			Other
chr1	ENSG00000163202	LCE3D	1.44129	259	1.31925	250			Other
chr1	ENSG00000163206	SMCP	1.60483	189	1.25683	183			Other
chr1	ENSG00000163207	IVL	1.29825	202	1.34441	233			Other
chr1	ENSG00000163209	SPRR3	1.3098	285	1.27232	341			Other
chr1	ENSG00000163216	SPRR2D	1.21804	303	1.09422	327			Other
chr1	ENSG00000163218	PGLYRP4	1.11589	345	1.14533	351			Other
chr1	ENSG00000163220	S100A9	1.05054	226	1.17625	228			Other
chr1	ENSG00000163221	S100A12	1.50998	336	1.42997	370			Other
chr1	ENSG00000163239	TDRD10	0.837012	321	0.693746	328			Other
chr1	ENSG00000163263	C1orf189	0.852467	353	0.68818	345			Other
chr1	ENSG00000163344	PMVK	0.623388	345	0.9404	398			Other
chr1	ENSG00000163346	PBXIP1	0.677344	287	0.648984	279			Other
chr1	ENSG00000163348	PYGO2	0.880633	311	0.830892	277			Other
chr1	ENSG00000163349	HIPK1	1.25595	438	1.00353	476			Other
chr1	ENSG00000163352	LENEP	0.758125	333	1.15914	334			Other
chr1	ENSG00000163354	DCST2	0.73653	302	0.707092	286			Other
chr1	ENSG00000163357	DCST1	0.73653	302	0.707092	286			Other
chr1	ENSG00000163362	INAVA	0.984277	392	1.13397	416			Other
chr1	ENSG00000163374	YY1AP1	0.862342	326	1.00692	313			Other
chr1	ENSG00000163382	NAXE	1.22126	231	1.46532	245			Other
chr1	ENSG00000163393	SLC22A15	1.49644	194	1.51523	208			Other
chr1	ENSG00000163395	IGFN1	1.72658	353	1.47234	377			Other
chr1	ENSG00000163399	ATP1A1	1.44571	220	1.42068	181			Other
chr1	ENSG00000163431	LMOD1	1.02625	271	1.27393	259			Other
chr1	ENSG00000163435	ELF3	1.16011	416	0.965608	388			Other
chr1	ENSG00000163444	TMEM183A	0.983879	222	0.982308	255			Other
chr1	ENSG00000163462	TRIM46	0.4251	307	0.68313	301			Other
chr1	ENSG00000163463	KRTCAP2	0.451523	290	0.628635	279			Other
chr1	ENSG00000163467	TSACC	1.11463	273	1.42629	296			Other
chr1	ENSG00000163468	CCT3	1.1138	325	0.907725	299			Other
chr1	ENSG00000163472	TMEM79	0.989723	170	0.958473	163			Other
chr1	ENSG00000163479	SSR2	1.0126	344	1.11999	375			Other
chr1	ENSG00000163485	ADORA1	1.02915	289	1.27691	273			Other
chr1	ENSG00000163518	FCRL4	1.7284	164	1.74104	149			Other
chr1	ENSG00000163531	NFASC	1.28131	299	1.06771	256			Other
chr1	ENSG00000163534	FCRL1	2.03112	130	1.72017	96			Other
chr1	ENSG00000163545	NUAK2	1.0224	381	1.05133	445			Other
chr1	ENSG00000163554	SPTA1	1.62348	213	1.52335	177			Other
chr1	ENSG00000163563	MNDA	1.28662	219	1.47806	193			Other
chr1	ENSG00000163564	PYHIN1	1.14562	257	1.26558	269			Other
chr1	ENSG00000163565	IFI16	0.975828	290	1.08794	263			Other
chr1	ENSG00000163568	AIM2	1.15809	266	1.15385	242			Other
chr1	ENSG00000163866	SMIM12	1.17572	341	1.33508	370			Other
chr1	ENSG00000163867	ZMYM6	1.55659	120	1.98601	114			Other
chr1	ENSG00000163873	GRIK3	1.05403	266	1.52101	259			Other
chr1	ENSG00000163874	ZC3H12A	1.19597	211	1.27089	223			Other
chr1	ENSG00000163875	MEAF6	1.41063	337	1.338	363			Other
chr1	ENSG00000163877	SNIP1	1.22953	346	1.0028	328			Other
chr1	ENSG00000163879	DNALI1	1.22788	401	0.919639	357			Other
chr1	ENSG00000163909	HEYL	1.02444	374	0.743905	361			Other
chr1	ENSG00000164002	EXO5	1.49025	321	1.67275	334			Other
chr1	ENSG00000164007	CLDN19	0.896716	278	1.02732	269			Other
chr1	ENSG00000164008	C1orf50	1.01696	361	1.06661	369			Other
chr1	ENSG00000164010	ERMAP	1.22678	368	0.989852	360			Other
chr1	ENSG00000164011	ZNF691	1.1362	219	0.908519	273			Other
chr1	ENSG00000168118	RAB4A	1.24026	343	1.57049	330			Other
chr1	ENSG00000168148	HIST3H3	1.749	244	1.69867	272			Other
chr1	ENSG00000168159	RNF187	2.06092	219	1.56238	248			Other
chr1	ENSG00000168243	GNG4	1.25395	394	1.03798	419			Other
chr1	ENSG00000168264	IRF2BP2	0.82143	390	0.732929	406			Other
chr1	ENSG00000168275	COA6	0.875845	440	0.994548	425			Other
chr1	ENSG00000168389	MFSD2A	0.918742	431	0.984578	436			Other
chr1	ENSG00000168509	HJV	1.80705	216	2.0398	171			Other
chr1	ENSG00000168528	SERINC2	1.23257	348	0.877265	342			Other
chr1	ENSG00000168653	NDUFS5	0.890804	363	0.832035	429			Other
chr1	ENSG00000168679	SLC16A4	1.26462	168	1.56116	169			Other
chr1	ENSG00000168710	AHCYL1	0.755461	354	0.850859	294			Other
chr1	ENSG00000168765	GSTM4	0.954315	395	1.0785	355			Other
chr1	ENSG00000169174	PCSK9	1.40207	241	1.38524	206			Other
chr1	ENSG00000169213	RAB3B	1.47973	166	1.48293	159			Other
chr1	ENSG00000169214	OR6F1	1.51933	238	1.88401	221			Other
chr1	ENSG00000169218	RSPO1	1.22034	365	1.28419	349			Other
chr1	ENSG00000169224	GCSAML	1.75142	236	2.18032	215			Other
chr1	ENSG00000169231	THBS3	0.620318	333	0.734188	314			Other
chr1	ENSG00000169241	SLC50A1	0.862569	342	0.702067	323			Other
chr1	ENSG00000169242	EFNA1	0.558051	215	0.844253	247			Other
chr1	ENSG00000169291	SHE	0.811504	344	0.69814	351			Other
chr1	ENSG00000169403	PTAFR	0.985553	348	1.29091	311			Other
chr1	ENSG00000169418	NPR1	1.00136	214	1.0173	224			Other
chr1	ENSG00000169442	CD52	0.945392	435	0.842935	361			Other
chr1	ENSG00000169469	SPRR1B	1.46979	228	1.04661	272			Other
chr1	ENSG00000169474	SPRR1A	1.36837	320	1.28139	355			Other
chr1	ENSG00000169504	CLIC4	0.947202	350	1.11265	355			Other
chr1	ENSG00000169509	CRCT1	1.81989	114	1.06197	99			Other
chr1	ENSG00000169598	DFFB	1.41736	192	1.40133	194			Other
chr1	ENSG00000169641	LUZP1	1.08213	313	1.01127	370			Other
chr1	ENSG00000169717	ACTRT2	1.41474	129	1.57092	132			Other
chr1	ENSG00000169885	CALML6	1.84691	88	1.38379	118			Other
chr1	ENSG00000169905	TOR1AIP2	1.25952	360	1.68429	332			Other
chr1	ENSG00000169914	OTUD3	0.981003	351	1.23295	362			Other
chr1	ENSG00000169962	TAS1R3	0.649122	44	1.03933	39			Other
chr1	ENSG00000169972	PUSL1	1.94349	65	0.922535	66			Other
chr1	ENSG00000169991	IFFO2	1.19241	301	0.99903	305			Other
chr1	ENSG00000170075	GPR37L1	1.00676	428	0.801241	441			Other
chr1	ENSG00000170128	GPR25	1.01197	347	1.14087	377			Other
chr1	ENSG00000170382	LRRN2	1.01676	252	1.02819	213			Other
chr1	ENSG00000170385	SLC30A1	0.894731	314	1.08526	327			Other
chr1	ENSG00000170498	KISS1	1.06741	246	1.01939	269			Other
chr1	ENSG00000170989	S1PR1	0.942174	333	0.968079	333			Other
chr1	ENSG00000171161	ZNF672	1.88642	188	2.36539	200			Other
chr1	ENSG00000171163	ZNF692	2.48993	179	2.97073	161			Other
chr1	ENSG00000171180	OR2M4	1.04915	261	1.11153	276			Other
chr1	ENSG00000171357	LURAP1	1.88991	122	1.92538	153			Other
chr1	ENSG00000171385	KCND3	1.43238	225	1.14082	241			Other
chr1	ENSG00000171488	LRRC8C	1.26403	387	1.0818	386			Other
chr1	ENSG00000171492	LRRC8D	1.28241	308	1.15061	324			Other
chr1	ENSG00000171502	COL24A1	1.31666	238	1.37979	278			Other
chr1	ENSG00000171517	LPAR3	1.53666	270	1.29609	273			Other
chr1	ENSG00000171603	CLSTN1	0.98881	257	0.772485	257			Other
chr1	ENSG00000171608	PIK3CD	0.872733	270	1.28843	261			Other
chr1	ENSG00000171612	SLC25A33	0.745215	313	0.763768	377			Other
chr1	ENSG00000171621	SPSB1	0.691385	315	0.52972	305			Other
chr1	ENSG00000171680	PLEKHG5	1.2116	266	1.60328	239			Other
chr1	ENSG00000171722	SPATA46	1.19525	227	1.44249	227			Other
chr1	ENSG00000171729	TMEM51	0.955431	549	1.13319	507			Other
chr1	ENSG00000171735	CAMTA1	1.02328	221	1.617	225			Other
chr1	ENSG00000171786	NHLH1	0.846422	273	1.04961	247			Other
chr1	ENSG00000171790	SLFNL1	1.61598	205	1.62047	180			Other
chr1	ENSG00000171793	CTPS1	1.27855	456	1.36603	411			Other
chr1	ENSG00000171806	METTL18	1.31358	380	1.38973	320			Other
chr1	ENSG00000171812	COL8A2	1.45726	161	1.33959	163			Other
chr1	ENSG00000171819	ANGPTL7	1.42969	185	1.42398	187			Other
chr1	ENSG00000171824	EXOSC10	1.24714	281	1.3856	260			Other
chr1	ENSG00000171872	KLF17	1.44262	361	0.977518	373			Other
chr1	ENSG00000171943	SRGAP2C	5.40476	21	5.37619	28			Other
chr1	ENSG00000171960	PPIH	1.47708	302	1.30002	291			Other
chr1	ENSG00000172031	EPHX4	1.08944	379	1.16261	319			Other
chr1	ENSG00000172155	LCE1D	1.15519	46	1.36965	35			Other
chr1	ENSG00000172260	NEGR1	1.98013	136	1.93454	119			Other
chr1	ENSG00000172339	ALG14	2.15133	218	2.09892	235			Other
chr1	ENSG00000172380	GNG12	1.2565	105	1.64273	107			Other
chr1	ENSG00000172410	INSL5	1.47351	368	1.31339	385			Other
chr1	ENSG00000172456	FGGY	1.24801	325	1.67545	343			Other
chr1	ENSG00000173080	RXFP4	0.845241	253	0.911431	274			Other
chr1	ENSG00000173110	HSPA6	2.04866	93	1.8414	85			Other
chr1	ENSG00000173171	MTX1	0.61072	359	0.743336	334			Other
chr1	ENSG00000173207	CKS1B	1.30883	285	0.966052	279			Other
chr1	ENSG00000173212	MAB21L3	1.69664	211	1.58607	204			Other
chr1	ENSG00000173218	VANGL1	1.70041	250	1.46116	258			Other
chr1	ENSG00000173285	OR10K1	1.03543	165	1.21196	168			Other
chr1	ENSG00000173369	C1QB	1.24153	206	1.06884	219			Other
chr1	ENSG00000173372	C1QA	1.25537	192	1.00572	189			Other
chr1	ENSG00000173406	DAB1	1.20291	415	1.25708	411			Other
chr1	ENSG00000173409	ARV1	1.51391	442	1.64453	378			Other
chr1	ENSG00000173436	MINOS1	1.06016	426	1.34886	440			Other
chr1	ENSG00000173614	NMNAT1	0.705865	314	0.992417	309			Other
chr1	ENSG00000173627	APOBEC4	1.61889	259	1.05601	268			Other
chr1	ENSG00000173641	HSPB7	0.989232	232	0.807391	225			Other
chr1	ENSG00000173660	UQCRH	1.99311	172	2.4098	147			Other
chr1	ENSG00000173662	TAS1R1	1.61162	292	1.27619	269			Other
chr1	ENSG00000173673	HES3	1.20608	198	1.00854	185			Other
chr1	ENSG00000173726	TOMM20	0.806829	499	0.843258	457			Other
chr1	ENSG00000173728	C1orf100	1.22988	272	1.19427	273			Other
chr1	ENSG00000173846	PLK3	0.782163	408	0.901693	411			Other
chr1	ENSG00000173947	PIFO	0.969129	376	0.763738	372			Other
chr1	ENSG00000174021	GNG5	1.7079	262	1.61354	299			Other
chr1	ENSG00000174059	CD34	1.61196	274	1.75714	271			Other
chr1	ENSG00000174151	CYB561D1	0.954418	252	1.21856	277			Other
chr1	ENSG00000174175	SELP	1.29327	427	1.34518	395			Other
chr1	ENSG00000174307	PHLDA3	1.36083	353	1.34277	393			Other
chr1	ENSG00000174332	GLIS1	1.43038	348	1.48986	319			Other
chr1	ENSG00000174348	PODN	1.45608	185	1.29714	159			Other
chr1	ENSG00000174371	EXO1	1.59289	282	1.41586	270			Other
chr1	ENSG00000174502	SLC26A9	0.984501	203	1.30734	228			Other
chr1	ENSG00000174514	MFSD4A	1.28718	197	0.999446	208			Other
chr1	ENSG00000174529	TMEM81	1.48303	337	1.30224	345			Other
chr1	ENSG00000174567	GOLT1A	1.35454	298	0.995045	271			Other
chr1	ENSG00000174574	AKIRIN1	0.922171	389	1.07714	393			Other
chr1	ENSG00000174606	ANGEL2	1.74895	252	1.43387	268			Other
chr1	ENSG00000174827	PDZK1	1.9032	278	1.94802	247			Other
chr1	ENSG00000174842	GLMN	1.03987	330	0.773278	345			Other
chr1	ENSG00000174876	AMY1B	2.60171	40	4.09228	30			Other
chr1	ENSG00000174950	CD164L2	0.75042	206	0.896469	235			Other
chr1	ENSG00000175087	PDIK1L	1.28037	419	1.27698	442			Other
chr1	ENSG00000175130	MARCKSL1	0.972357	192	0.823978	231			Other
chr1	ENSG00000175137	SH3BP5L	1.6079	214	1.92139	257			Other
chr1	ENSG00000175143	OR2T1	1.29075	230	1.46868	234			Other
chr1	ENSG00000175206	NPPA	1.03221	378	1.10585	334			Other
chr1	ENSG00000175262	C1orf127	1.22901	237	1.47391	263			Other
chr1	ENSG00000175279	CENPS	0.74943	289	0.695517	297			Other
chr1	ENSG00000175707	KDF1	1.02123	278	1.17857	262			Other
chr1	ENSG00000175756	AURKAIP1	1.62813	137	1.18104	158			Other
chr1	ENSG00000175793	SFN	1.51707	288	1.53268	277			Other
chr1	ENSG00000175984	DENND2C	1.10239	175	1.28091	219			Other
chr1	ENSG00000176022	B3GALT6	1.28337	133	1.31554	142			Other
chr1	ENSG00000176083	ZNF683	0.900549	501	0.894833	463			Other
chr1	ENSG00000176092	CRYBG2	0.848877	407	0.794814	388			Other
chr1	ENSG00000176256	HMGB4	1.71824	315	1.31334	359			Other
chr1	ENSG00000176261	ZBTB8OS	1.43746	328	0.93237	338			Other
chr1	ENSG00000176320	AL138899.1	1.89735	181	1.32369	182			Other
chr1	ENSG00000176393	RNPEP	0.987547	483	1.01692	439			Other
chr1	ENSG00000176444	CLK2	0.830647	377	0.700884	372			Other
chr1	ENSG00000176754	LINC00303	1.15792	348	1.02246	369			Other
chr1	ENSG00000177000	MTHFR	1.35959	292	1.21499	269			Other
chr1	ENSG00000177144	NUDT4B	3.60895	22	4.64815	18			Other
chr1	ENSG00000177151	OR2T35	2.06672	23	2.26406	32			Other
chr1	ENSG00000177174	OR14C36	1.36128	158	2.04374	132			Other
chr1	ENSG00000177181	RIMKLA	1.73048	218	1.08852	234			Other
chr1	ENSG00000177186	OR2M7	1.50209	251	1.9107	238			Other
chr1	ENSG00000177201	OR2T12	1.5387	196	1.56509	190			Other
chr1	ENSG00000177212	OR2T33	1.58004	124	1.20677	125			Other
chr1	ENSG00000177272	KCNA3	1.1062	337	1.27334	289			Other
chr1	ENSG00000177275	OR2AJ1	1.76249	196	1.90877	229			Other
chr1	ENSG00000177301	KCNA2	1.14266	350	0.926728	391			Other
chr1	ENSG00000177414	UBE2U	1.55818	192	1.52973	182			Other
chr1	ENSG00000177462	OR2T8	1.92013	155	1.97462	165			Other
chr1	ENSG00000177476	OR2G3	1.65497	299	1.7215	327			Other
chr1	ENSG00000177489	OR2G2	1.43109	234	1.9248	252			Other
chr1	ENSG00000177535	OR2B11	1.44662	266	1.46493	253			Other
chr1	ENSG00000177551	NHLH2	1.32163	305	1.29846	321			Other
chr1	ENSG00000177606	JUN	0.87	271	0.873461	243			Other
chr1	ENSG00000177614	PGBD5	1.42776	260	1.53088	228			Other
chr1	ENSG00000177628	GBA	1.00011	272	0.955521	226			Other
chr1	ENSG00000177674	AGTRAP	0.980363	423	0.996164	424			Other
chr1	ENSG00000177757	FAM87B	3.45868	47	2.50937	40			Other
chr1	ENSG00000177800	TMEM78	0.754531	292	0.894277	265			Other
chr1	ENSG00000177807	KCNJ10	1.31047	355	1.22922	367			Other
chr1	ENSG00000177868	SVBP	1.15878	388	1.04001	384			Other
chr1	ENSG00000177888	ZBTB41	1.71855	271	1.86764	320			Other
chr1	ENSG00000177954	RPS27	0.601377	402	0.853581	391			Other
chr1	ENSG00000178028	DMAP1	1.10461	339	1.23188	353			Other
chr1	ENSG00000178096	BOLA1	1.01463	254	1.42156	200			Other
chr1	ENSG00000178104	PDE4DIP	2.32147	21	5.35381	15			Other
chr1	ENSG00000178395	CCDC185	1.76812	204	1.88143	230			Other
chr1	ENSG00000178585	CTNNBIP1	0.982154	262	0.790655	301			Other
chr1	ENSG00000178796	RIIAD1	1.08339	100	0.908149	105			Other
chr1	ENSG00000178821	TMEM52	1.84191	24	1.12449	38			Other
chr1	ENSG00000178828	RNF186	1.01701	256	1.08844	242			Other
chr1	ENSG00000178922	HYI	0.898792	412	0.813406	454			Other
chr1	ENSG00000178965	ERICH3	1.2214	303	1.22414	309			Other
chr1	ENSG00000179002	TAS1R2	1.17225	286	1.10447	277			Other
chr1	ENSG00000179023	KLHDC7A	1.51027	306	1.11028	327			Other
chr1	ENSG00000179051	RCC2	1.77974	194	1.88685	218			Other
chr1	ENSG00000179085	DPM3	0.979588	354	1.0076	374			Other
chr1	ENSG00000179163	FUCA1	1.08896	201	1.24521	185			Other
chr1	ENSG00000179172	HNRNPCL1	2.22874	153	2.44872	162			Other
chr1	ENSG00000179178	TMEM125	0.981304	329	0.919744	297			Other
chr1	ENSG00000179397	CATSPERE	1.40008	292	1.50761	324			Other
chr1	ENSG00000179403	VWA1	1.32389	73	1.42254	87			Other
chr1	ENSG00000179412	HNRNPCL4	2.70456	54	2.93518	58			Other
chr1	ENSG00000179452	LINC01699	0.984805	311	0.979393	343			Other
chr1	ENSG00000179456	ZBTB18	1.45979	176	1.74169	204			Other
chr1	ENSG00000179546	HTR1D	0.695908	493	0.74878	530			Other
chr1	ENSG00000179639	FCER1A	1.31952	193	1.30996	237			Other
chr1	ENSG00000179862	CITED4	0.817857	237	1.19824	246			Other
chr1	ENSG00000179902	C1orf194	0.906593	449	1.10637	448			Other
chr1	ENSG00000179914	ITLN1	1.23239	428	1.00996	397			Other
chr1	ENSG00000179930	ZNF648	1.37003	350	1.14899	361			Other
chr1	ENSG00000180098	TRNAU1AP	1.33601	429	0.960224	470			Other
chr1	ENSG00000180198	RCC1	1.10055	416	1.08139	420			Other
chr1	ENSG00000180287	PLD5	1.32723	272	1.42525	269			Other
chr1	ENSG00000180433	OR6K6	1.59612	226	1.3126	217			Other
chr1	ENSG00000180488	MIGA1	1.96372	220	1.58514	246			Other
chr1	ENSG00000180667	YOD1	0.928934	321	1.16889	327			Other
chr1	ENSG00000180708	OR10K2	2.25404	128	1.87505	113			Other
chr1	ENSG00000180758	GPR157	0.897311	349	0.95028	358			Other
chr1	ENSG00000180869	LINC01555	1.05588	367	1.02656	354			Other
chr1	ENSG00000180875	GREM2	1.47137	295	1.29869	327			Other
chr1	ENSG00000180999	C1orf105	0.851815	326	1.01913	285			Other
chr1	ENSG00000181036	FCRL6	1.0758	245	1.07567	235			Other
chr1	ENSG00000181218	HIST3H2A	1.74433	318	1.51081	318			Other
chr1	ENSG00000181450	ZNF678	1.92622	178	2.38494	192			Other
chr1	ENSG00000181656	GPR88	1.53398	132	1.26295	145			Other
chr1	ENSG00000181754	AMIGO1	1.09175	306	1.21232	333			Other
chr1	ENSG00000181773	GPR3	0.667324	218	0.758369	223			Other
chr1	ENSG00000181817	LSM10	1.05637	414	1.09889	386			Other
chr1	ENSG00000181873	IBA57	1.43028	102	1.45674	97			Other
chr1	ENSG00000182004	SNRPE	1.26639	304	0.959227	326			Other
chr1	ENSG00000182118	FAM89A	1.50842	350	1.28574	323			Other
chr1	ENSG00000182134	TDRKH	1.24088	270	1.31071	246			Other
chr1	ENSG00000182183	SHISAL2A	0.896961	334	1.12149	343			Other
chr1	ENSG00000182330	PRAMEF8	2.12713	43	3.16319	39			Other
chr1	ENSG00000182749	PAQR7	1.56195	241	1.32344	259			Other
chr1	ENSG00000182783	OR2T29	3.28148	9	2.73115	6			Other
chr1	ENSG00000182795	C1orf116	1.09372	277	1.22146	247			Other
chr1	ENSG00000182827	ACBD3	1.12067	443	1.27413	380			Other
chr1	ENSG00000182866	LCK	0.937623	308	0.828644	295			Other
chr1	ENSG00000182898	TCHHL1	1.6837	240	1.47289	295			Other
chr1	ENSG00000182901	RGS7	0.978773	255	1.48698	252			Other
chr1	ENSG00000183114	FAM43B	1.20275	263	1.10659	250			Other
chr1	ENSG00000183155	RABIF	1.73131	253	1.19839	248			Other
chr1	ENSG00000183291	SELENOF	1.78451	230	1.84682	247			Other
chr1	ENSG00000183310	OR2T34	3.31267	16	0.0833333	6			Other
chr1	ENSG00000183317	EPHA10	1.0402	438	0.988438	420			Other
chr1	ENSG00000183347	GBP6	1.14149	343	1.30253	319			Other
chr1	ENSG00000183386	FHL3	0.979113	430	1.01341	451			Other
chr1	ENSG00000183431	SF3A3	1.15494	354	0.856464	347			Other
chr1	ENSG00000183508	TENT5C	1.78783	296	1.64222	275			Other
chr1	ENSG00000183520	UTP11	0.763487	336	1.0261	320			Other
chr1	ENSG00000183598	HIST2H3D	2.83567	56	3.2728	58			Other
chr1	ENSG00000183615	FAM167B	0.905535	335	0.921105	320			Other
chr1	ENSG00000183682	BMP8A	0.807056	220	0.873037	180			Paternal
chr1	ENSG00000183726	TMEM50A	1.16689	136	1.21516	138			Other
chr1	ENSG00000183780	SLC35F3	1.16375	348	1.11798	369			Other
chr1	ENSG00000183814	LIN9	1.51484	313	1.31598	332			Other
chr1	ENSG00000183831	ANKRD45	1.44094	326	1.04742	324			Other
chr1	ENSG00000183853	KIRREL1	1.29326	174	1.39372	187			Other
chr1	ENSG00000183856	IQGAP3	1.17469	239	1.21271	203			Other
chr1	ENSG00000183888	SRARP	0.807262	318	0.729603	285			Other
chr1	ENSG00000184005	ST6GALNAC3	1.7014	317	1.676	327			Other
chr1	ENSG00000184007	PTP4A2	1.15626	405	0.962734	377			Other
chr1	ENSG00000184144	CNTN2	1.38075	265	0.970164	219			Other
chr1	ENSG00000184148	SPRR4	1.0908	252	1.00157	278			Other
chr1	ENSG00000184155	OR10J5	1.47783	150	1.5033	181			Other
chr1	ENSG00000184163	C1QTNF12	0.545494	92	0.767569	61			Other
chr1	ENSG00000184260	HIST2H2AC	1.13417	297	1.39905	236			Other
chr1	ENSG00000184270	HIST2H2AB	1.01463	254	1.42156	200			Other
chr1	ENSG00000184292	TACSTD2	1.62399	313	1.56168	340			Other
chr1	ENSG00000184313	MROH7	1.3257	356	1.25125	414			Other
chr1	ENSG00000184330	S100A7A	1.39596	146	1.17463	153			Other
chr1	ENSG00000184371	CSF1	1.24244	160	0.923435	175			Other
chr1	ENSG00000184389	A3GALT2	1.16915	275	1.26682	273			Other
chr1	ENSG00000184454	NCMAP	1.04888	351	0.973209	333			Other
chr1	ENSG00000184588	PDE4B	1.25837	210	1.2614	226			Other
chr1	ENSG00000184599	FAM19A3	1.09099	344	0.761388	333			Other
chr1	ENSG00000184677	ZBTB40	1.13743	248	1.44573	265			Other
chr1	ENSG00000184678	HIST2H2BE	1.23639	316	1.46501	255			Other
chr1	ENSG00000184908	CLCNKB	0.673969	235	0.965251	236			Other
chr1	ENSG00000185090	MANEAL	0.819909	262	0.912143	244			Other
chr1	ENSG00000185104	FAF1	2.02516	183	2.62269	183			Other
chr1	ENSG00000185155	MIXL1	1.44468	315	1.39415	319			Other
chr1	ENSG00000185220	PGBD2	2.05091	126	2.40478	142			Other
chr1	ENSG00000185278	ZBTB37	1.1571	306	0.956846	288			Other
chr1	ENSG00000185420	SMYD3	1.11096	279	1.17309	291			Other
chr1	ENSG00000185436	IFNLR1	1.00318	394	1.2432	355			Other
chr1	ENSG00000185483	ROR1	1.24978	290	1.38609	302			Other
chr1	ENSG00000185499	MUC1	0.71442	190	0.93436	173			Other
chr1	ENSG00000185519	FAM131C	1.01945	194	0.728162	188			Other
chr1	ENSG00000185523	SPATA45	1.26437	351	1.16476	339			Other
chr1	ENSG00000185630	PBX1	1.25365	270	1.30474	295			Other
chr1	ENSG00000185668	POU3F1	0.820175	216	0.778744	230			Other
chr1	ENSG00000185842	DNAH14	1.36294	323	1.34766	287			Other
chr1	ENSG00000185860	CCDC190	1.4157	288	1.4499	250			Other
chr1	ENSG00000185888	PRSS38	1.48104	235	1.62553	246			Other
chr1	ENSG00000185946	RNPC3	2.95096	136	2.5711	169			Other
chr1	ENSG00000185962	LCE3A	1.13098	314	1.13818	293			Other
chr1	ENSG00000185966	LCE3E	1.60918	202	1.34098	200			Other
chr1	ENSG00000186007	LEMD1	1.30414	270	1.26475	283			Other
chr1	ENSG00000186063	AIDA	1.68775	322	1.61718	308			Other
chr1	ENSG00000186086	NBPF6	3.47757	25	1.2631	25			Other
chr1	ENSG00000186092	OR4F5	4.72593	27	5.55	20			Other
chr1	ENSG00000186094	AGBL4	1.53878	220	1.58643	217			Other
chr1	ENSG00000186118	TEX38	2.43644	224	2.37973	249			Other
chr1	ENSG00000186141	POLR3C	1.3685	170	1.34405	160			Other
chr1	ENSG00000186150	UBL4B	1.50842	307	1.23772	297			Other
chr1	ENSG00000186160	CYP4Z1	1.66206	171	2.14157	170			Other
chr1	ENSG00000186197	EDARADD	1.30005	371	1.20671	376			Other
chr1	ENSG00000186205	MARC1	1.01602	331	1.40693	330			Other
chr1	ENSG00000186207	LCE5A	1.65142	229	1.45246	182			Other
chr1	ENSG00000186226	LCE1E	1.53693	112	1.53869	118			Other
chr1	ENSG00000186283	TOR3A	1.04806	470	1.20829	440			Other
chr1	ENSG00000186306	OR10T2	1.90368	196	1.57884	237			Other
chr1	ENSG00000186364	NUDT17	1.27197	268	1.36483	275			Other
chr1	ENSG00000186377	CYP4X1	1.79823	305	1.85783	290			Other
chr1	ENSG00000186409	CCDC30	1.6584	223	1.30664	227			Other
chr1	ENSG00000186440	OR6P1	1.67333	214	1.48336	201			Other
chr1	ENSG00000186501	TMEM222	0.924791	313	1.01709	299			Other
chr1	ENSG00000186510	CLCNKA	0.965384	258	0.794649	240			Other
chr1	ENSG00000186517	ARHGAP30	1.25248	246	1.24691	269			Other
chr1	ENSG00000186564	FOXD2	1.64741	302	1.46295	315			Other
chr1	ENSG00000186603	HPDL	1.1202	313	1.3045	318			Other
chr1	ENSG00000186790	FOXE3	1.44926	287	1.47512	283			Other
chr1	ENSG00000186827	TNFRSF4	1.2665	28	1.43019	25			Other
chr1	ENSG00000186844	LCE1A	1.3342	278	1.57616	301			Other
chr1	ENSG00000186891	TNFRSF18	1.50752	120	2.36512	73			Other
chr1	ENSG00000186973	FAM183A	1.21209	336	0.825876	327			Other
chr1	ENSG00000187010	RHD	3.10714	17	0.68877	71			Other
chr1	ENSG00000187017	ESPN	1.51451	136	1.86654	135			Other
chr1	ENSG00000187048	CYP4A11	1.64128	141	2.03971	120			Other
chr1	ENSG00000187080	OR2AK2	1.70456	148	1.64257	141			Other
chr1	ENSG00000187140	FOXD3	1.41168	247	1.3875	234			Other
chr1	ENSG00000187144	SPATA21	1.37516	353	1.30873	347			Other
chr1	ENSG00000187147	RNF220	1.71629	254	1.17845	249			Other
chr1	ENSG00000187170	LCE4A	1.17023	156	1.05105	171			Other
chr1	ENSG00000187173	LCE2A	1.15568	178	1.28225	204			Other
chr1	ENSG00000187180	LCE2C	1.25212	151	1.36533	166			Other
chr1	ENSG00000187223	LCE2D	1.49867	165	1.61429	191			Other
chr1	ENSG00000187238	LCE3B	1.388	83	1.47878	168			Other
chr1	ENSG00000187513	GJA4	1.13545	218	1.32633	237			Other
chr1	ENSG00000187545	PRAMEF10	2.07369	65	2.74166	64			Other
chr1	ENSG00000187554	TLR5	1.2033	376	1.09762	369			Other
chr1	ENSG00000187583	PLEKHN1	1.55895	95	1.75724	82			Other
chr1	ENSG00000187608	ISG15	1.16291	117	1.14269	151			Other
chr1	ENSG00000187634	SAMD11	1.43008	72	1.21295	76			Other
chr1	ENSG00000187642	PERM1	1.05507	151	0.940126	166			Other
chr1	ENSG00000187701	OR2T27	2.3134	58	1.72758	42			Other
chr1	ENSG00000187730	GABRD	1.97154	189	1.52957	167			Other
chr1	ENSG00000187733	AMY1C	2.075	17	3.62451	17			Other
chr1	ENSG00000187800	PEAR1	0.735225	420	0.911561	428			Other
chr1	ENSG00000187801	ZFP69B	1.14486	324	1.08363	352			Other
chr1	ENSG00000187815	ZFP69	0.971265	173	0.909627	202			Other
chr1	ENSG00000187862	TTC24	0.812579	193	1.36685	187			Other
chr1	ENSG00000187889	FYB2	1.20239	312	1.23833	276			Other
chr1	ENSG00000187942	LDLRAD2	1.48359	266	1.47681	247			Other
chr1	ENSG00000187961	KLHL17	1.36472	101	1.42779	111			Other
chr1	ENSG00000187980	PLA2G2C	0.790481	247	0.909127	251			Other
chr1	ENSG00000188004	SNHG28	1.38336	284	1.24401	288			Other
chr1	ENSG00000188015	S100A3	1.48285	257	1.07946	236			Other
chr1	ENSG00000188060	RAB42	0.867122	296	1.04996	286			Other
chr1	ENSG00000188092	GPR89B	3.003	42	2.68694	45			Other
chr1	ENSG00000188157	AGRN	1.24923	181	0.907097	180			Other
chr1	ENSG00000188257	PLA2G2A	0.764038	304	1.01564	269			Other
chr1	ENSG00000188290	HES4	1.17467	107	1.12513	142			Other
chr1	ENSG00000188295	ZNF669	1.24232	296	1.57932	284			Other
chr1	ENSG00000188340	OR6N2	1.49952	242	1.14565	223			Other
chr1	ENSG00000188396	TCTEX1D4	1.10603	368	1.02994	315			Other
chr1	ENSG00000188404	SELL	1.10066	308	0.938417	321			Other
chr1	ENSG00000188529	SRSF10	1.46033	218	1.27603	211			Other
chr1	ENSG00000188558	OR2G6	1.70898	47	2.64085	41			Other
chr1	ENSG00000188585	CLEC20A	1.10136	236	1.63492	209			Other
chr1	ENSG00000188610	FAM72B	5.25	22	5.46667	29			Other
chr1	ENSG00000188641	DPYD	1.85283	185	1.6929	183			Other
chr1	ENSG00000188643	S100A16	1.12217	274	1.25743	285			Other
chr1	ENSG00000188672	RHCE	1.06555	280	0.966262	270			Other
chr1	ENSG00000188739	RBM34	0.808657	492	0.791222	455			Other
chr1	ENSG00000188761	BCL2L15	1.50382	288	1.25843	330			Other
chr1	ENSG00000188770	OPTC	0.635374	284	0.858903	276			Other
chr1	ENSG00000188782	CATSPER4	0.881899	376	0.960067	318			Other
chr1	ENSG00000188783	PRELP	0.896872	384	0.733543	353			Other
chr1	ENSG00000188784	PLA2G2E	0.833003	350	1.09657	330			Other
chr1	ENSG00000188786	MTF1	0.910846	365	0.718231	334			Other
chr1	ENSG00000188800	TMCO2	0.989787	388	0.960638	366			Other
chr1	ENSG00000188807	TMEM201	0.780099	347	0.677475	293			Other
chr1	ENSG00000188822	CNR2	1.16102	214	0.875478	232			Other
chr1	ENSG00000188859	FAM78B	1.34868	164	1.12476	160			Other
chr1	ENSG00000188910	GJB3	1.09093	224	1.07322	194			Other
chr1	ENSG00000188931	CFAP126	0.972343	365	0.954101	387			Other
chr1	ENSG00000188976	NOC2L	1.36894	92	1.19748	108			Other
chr1	ENSG00000188984	AADACL3	1.97821	183	1.96013	184			Other
chr1	ENSG00000189030	VHLL	1.41265	329	1.23529	304			Other
chr1	ENSG00000189171	S100A13	1.0731	257	1.45659	266			Other
chr1	ENSG00000189181	OR14I1	1.58063	307	1.50652	255			Other
chr1	ENSG00000189195	BTBD8	1.57132	281	1.26136	314			Other
chr1	ENSG00000189266	PNRC2	1.01031	205	1.53646	203			Other
chr1	ENSG00000189280	GJB5	1.24976	124	1.3881	117			Other
chr1	ENSG00000189334	S100A14	1.08747	376	1.13462	338			Other
chr1	ENSG00000189337	KAZN	1.17348	334	1.00147	296			Other
chr1	ENSG00000189339	SLC35E2B	1.31909	118	1.55036	144			Other
chr1	ENSG00000189409	MMP23B	1.08958	122	0.98485	123			Other
chr1	ENSG00000189410	SH2D5	1.3439	252	1.27314	252			Other
chr1	ENSG00000189433	GJB4	1.58247	163	0.998819	164			Other
chr1	ENSG00000196071	OR2L13	1.65731	233	2.11967	229			Other
chr1	ENSG00000196154	S100A4	1.55839	235	1.05292	199			Other
chr1	ENSG00000196171	OR6K2	1.44901	159	1.35979	175			Other
chr1	ENSG00000196182	STK40	1.61299	289	1.67929	278			Other
chr1	ENSG00000196184	OR10J1	1.48515	233	1.72128	213			Other
chr1	ENSG00000196187	TMEM63A	1.23018	315	1.14115	300			Other
chr1	ENSG00000196188	CTSE	1.26979	360	1.22997	353			Other
chr1	ENSG00000196189	SEMA4A	0.959704	247	0.545995	268			Other
chr1	ENSG00000196240	OR2T2	1.56239	73	2.27508	95			Other
chr1	ENSG00000196242	OR2C3	1.40372	264	1.67003	248			Other
chr1	ENSG00000196289	BECN2	1.25976	435	1.09507	396			Other
chr1	ENSG00000196352	CD55	1.50933	110	1.21193	95			Other
chr1	ENSG00000196369	SRGAP2B	4.65328	45	4.7031	46			Other
chr1	ENSG00000196407	THEM5	1.3068	269	0.868041	245			Other
chr1	ENSG00000196418	ZNF124	1.30067	142	1.79388	147			Other
chr1	ENSG00000196420	S100A5	1.26851	280	1.5394	320			Other
chr1	ENSG00000196427	NBPF4	1.90422	61	1.35242	59			Other
chr1	ENSG00000196449	YRDC	0.716305	334	0.974465	335			Other
chr1	ENSG00000196482	ESRRG	1.31368	285	1.44535	282			Other
chr1	ENSG00000196505	GDAP2	2.2068	209	1.87864	162			Other
chr1	ENSG00000196517	SLC6A9	1.14173	292	1.20139	320			Other
chr1	ENSG00000196539	OR2T3	2.09308	71	2.22609	68			Other
chr1	ENSG00000196550	FAM72A	4.45283	25	4.46571	32			Other
chr1	ENSG00000196581	AJAP1	1.1427	154	0.873976	178			Other
chr1	ENSG00000196660	SLC30A10	1.65655	247	2.03376	240			Other
chr1	ENSG00000196734	LCE1B	1.44896	187	0.839275	225			Other
chr1	ENSG00000196754	S100A2	1.33124	234	1.11096	216			Other
chr1	ENSG00000196772	OR14A16	1.35641	245	2.01642	230			Other
chr1	ENSG00000196805	SPRR2B	1.2457	382	1.21467	392			Other
chr1	ENSG00000196878	LAMB3	1.45702	342	1.58177	354			Other
chr1	ENSG00000196890	HIST3H2BB	1.70253	308	1.54947	315			Other
chr1	ENSG00000196944	OR2T4	1.83849	172	1.99239	179			Other
chr1	ENSG00000197056	ZMYM1	1.55659	120	1.95934	113			Other
chr1	ENSG00000197084	LCE1C	1.40272	176	1.0562	180			Other
chr1	ENSG00000197106	SLC6A17	1.34093	183	1.16597	213			Other
chr1	ENSG00000197147	LRRC8B	1.48359	209	1.25861	222			Other
chr1	ENSG00000197241	SLC2A7	0.71787	334	0.899719	382			Other
chr1	ENSG00000197245	FAM110D	0.880072	422	0.927392	351			Other
chr1	ENSG00000197273	GUCA2A	1.1561	129	0.991274	151			Other
chr1	ENSG00000197312	DDI2	1.5149	235	1.37606	185			Other
chr1	ENSG00000197323	TRIM33	1.52576	245	1.44608	247			Other
chr1	ENSG00000197364	S100A7L2	1.5076	313	1.36004	342			Other
chr1	ENSG00000197403	OR6N1	1.42847	169	1.22231	173			Other
chr1	ENSG00000197429	IPP	2.15794	190	2.24641	168			Other
chr1	ENSG00000197437	OR13G1	1.52978	221	1.43297	238			Other
chr1	ENSG00000197454	OR2L5	1.27753	208	1.96259	190			Other
chr1	ENSG00000197472	ZNF695	0.996893	307	1.32731	293			Other
chr1	ENSG00000197520	FAM177B	1.53741	159	1.5824	208			Other
chr1	ENSG00000197530	MIB2	1.03098	258	1.14527	252			Other
chr1	ENSG00000197532	OR6Y1	1.31215	161	1.49602	195			Other
chr1	ENSG00000197568	HHLA3	1.98634	371	1.9266	356			Other
chr1	ENSG00000197587	DMBX1	2.61266	97	2.93297	123			Other
chr1	ENSG00000197591	OR11L1	1.57619	328	1.5388	351			Other
chr1	ENSG00000197622	CDC42SE1	1.10225	415	0.818794	388			Other
chr1	ENSG00000197721	CR1L	1.56204	257	2.00998	230			Other
chr1	ENSG00000197747	S100A10	0.992226	346	1.18112	351			Other
chr1	ENSG00000197769	MAP1LC3C	1.04626	404	1.14782	425			Other
chr1	ENSG00000197780	TAF13	1.12208	364	1.26646	378			Other
chr1	ENSG00000197785	ATAD3A	0.889364	159	1.46425	152			Other
chr1	ENSG00000197852	INKA2	1.08213	363	1.01009	392			Other
chr1	ENSG00000197880	MDS2	1.18402	361	1.32423	349			Other
chr1	ENSG00000197915	HRNR	1.32762	190	1.26915	207			Other
chr1	ENSG00000197921	HES5	1.27995	170	1.3197	176			Other
chr1	ENSG00000197956	S100A6	1.24468	223	1.41325	259			Other
chr1	ENSG00000197959	DNM3	1.59594	242	1.41033	241			Other
chr1	ENSG00000197965	MPZL1	1.54649	383	1.2365	379			Other
chr1	ENSG00000197982	C1orf122	0.765361	326	1.02402	339			Other
chr1	ENSG00000198019	FCGR1B	4.31167	31	4.72155	19			Other
chr1	ENSG00000198049	AVPR1B	0.963669	221	1.37683	214			Other
chr1	ENSG00000198104	OR2T6	1.9256	237	1.86448	215			Other
chr1	ENSG00000198128	OR2L3	1.53772	174	1.78673	178			Other
chr1	ENSG00000198160	MIER1	1.73712	292	1.8491	295			Other
chr1	ENSG00000198162	MAN1A2	2.12246	208	1.80429	214			Other
chr1	ENSG00000198198	SZT2	1.20186	485	0.967421	438			Other
chr1	ENSG00000198216	CACNA1E	1.33697	312	1.14983	337			Other
chr1	ENSG00000198400	NTRK1	1.41911	269	1.00826	276			Other
chr1	ENSG00000198468	FLVCR1-DT	1.15837	468	1.03826	441			Other
chr1	ENSG00000198483	ANKRD35	1.5867	235	1.78732	222			Other
chr1	ENSG00000198492	YTHDF2	1.07344	352	0.837417	369			Other
chr1	ENSG00000198520	ARMH1	1.14056	387	1.26548	339			Other
chr1	ENSG00000198570	RD3	1.01795	375	1.28712	352			Other
chr1	ENSG00000198574	SH2D1B	1.77568	368	1.82536	337			Other
chr1	ENSG00000198601	OR2M2	1.67698	215	1.65871	180			Other
chr1	ENSG00000198625	MDM4	1.31754	374	1.44947	401			Other
chr1	ENSG00000198626	RYR2	1.677	181	1.84931	203			Other
chr1	ENSG00000198691	ABCA4	1.55501	284	1.3334	259			Other
chr1	ENSG00000198700	IPO9	1.16034	440	1.41074	387			Other
chr1	ENSG00000198715	GLMP	0.901038	228	0.977758	232			Other
chr1	ENSG00000198734	F5	1.14823	220	1.12137	191			Other
chr1	ENSG00000198746	GPATCH3	1.22555	262	1.12471	238			Other
chr1	ENSG00000198754	OXCT2	1.04929	90	0.903877	90			Other
chr1	ENSG00000198756	COLGALT2	1.30537	341	1.53594	314			Other
chr1	ENSG00000198758	EPS8L3	0.979188	286	0.866307	275			Other
chr1	ENSG00000198765	SYCP1	1.419	218	1.28618	210			Other
chr1	ENSG00000198771	RCSD1	1.24447	349	1.43271	374			Other
chr1	ENSG00000198793	MTOR	1.54033	325	1.61406	263			Other
chr1	ENSG00000198797	BRINP2	1.58391	197	1.39281	190			Other
chr1	ENSG00000198799	LRIG2	1.40348	229	1.2573	275			Other
chr1	ENSG00000198815	FOXJ3	1.22319	242	1.07749	243			Other
chr1	ENSG00000198821	CD247	1.00188	356	1.0126	315			Other
chr1	ENSG00000198830	HMGN2	1.16587	136	0.838254	124			Other
chr1	ENSG00000198835	GJC2	1.6976	163	1.66856	153			Other
chr1	ENSG00000198837	DENND4B	0.965405	350	0.773156	359			Other
chr1	ENSG00000198841	KTI12	1.64561	168	1.5792	191			Other
chr1	ENSG00000198842	DUSP27	1.37796	331	1.1455	354			Other
chr1	ENSG00000198854	C1orf68	1.17399	246	1.41658	261			Other
chr1	ENSG00000198860	TSEN15	1.60374	292	1.71133	302			Other
chr1	ENSG00000198890	PRMT6	1.53558	341	1.55435	333			Other
chr1	ENSG00000198892	SHISA4	0.840464	290	0.799213	346			Other
chr1	ENSG00000198912	C1orf174	1.966	187	1.49694	181			Other
chr1	ENSG00000198929	NOS1AP	1.62344	262	1.50304	247			Other
chr1	ENSG00000198952	SMG5	0.942179	152	0.855504	145			Other
chr1	ENSG00000198965	OR10R2	1.32579	168	1.13553	187			Other
chr1	ENSG00000198967	OR10Z1	1.55599	149	1.58313	124			Other
chr1	ENSG00000203356	LINC01562	2.00306	265	1.93454	244			Other
chr1	ENSG00000203601	LINC00970	0.880622	382	1.07376	378			Other
chr1	ENSG00000203605	AC096543.1	1.34325	290	1.42634	267			Other
chr1	ENSG00000203620	AL354919.1	1.07274	475	0.866006	432			Other
chr1	ENSG00000203661	OR2T5	2.13709	28	2.51249	41			Other
chr1	ENSG00000203663	OR2L2	1.69115	160	1.35483	162			Other
chr1	ENSG00000203666	EFCAB2	1.41369	333	1.41497	360			Other
chr1	ENSG00000203667	COX20	1.27567	306	1.43831	366			Other
chr1	ENSG00000203668	CHML	1.32949	245	1.78731	198			Other
chr1	ENSG00000203684	IBA57-DT	1.7507	124	1.75143	107			Other
chr1	ENSG00000203685	STUM	1.30508	298	1.39338	324			Other
chr1	ENSG00000203697	CAPN8	1.12249	418	0.870879	452			Other
chr1	ENSG00000203705	TATDN3	1.05673	362	0.989675	363			Other
chr1	ENSG00000203709	MIR29B2CHG	1.62521	299	1.41404	296			Other
chr1	ENSG00000203710	CR1	1.05648	334	1.35884	281			Other
chr1	ENSG00000203721	LINC00862	1.1558	303	1.34269	295			Other
chr1	ENSG00000203724	C1orf53	1.68539	325	1.47083	345			Other
chr1	ENSG00000203729	LINC00272	1.37273	194	1.10093	174			Other
chr1	ENSG00000203730	TEDDM1	1.42485	293	1.28043	304			Other
chr1	ENSG00000203737	GPR52	1.52698	345	1.26695	346			Other
chr1	ENSG00000203740	METTL11B	0.9543	316	0.879716	319			Other
chr1	ENSG00000203747	FCGR3A	1.22043	40	1.69246	42			Other
chr1	ENSG00000203757	OR6K3	1.71478	193	1.45481	176			Other
chr1	ENSG00000203782	LOR	1.16671	298	1.20477	291			Other
chr1	ENSG00000203783	PRR9	0.959975	207	0.931312	206			Other
chr1	ENSG00000203784	LELP1	1.29859	207	1.20826	215			Other
chr1	ENSG00000203785	SPRR2E	2.46097	212	2.06836	200			Other
chr1	ENSG00000203786	KPRP	1.30249	146	1.21173	156			Other
chr1	ENSG00000203811	HIST2H3C	2.1119	84	2.02458	90			Other
chr1	ENSG00000203812	HIST2H2AA3	1.86542	119	2.08076	115			Other
chr1	ENSG00000203814	HIST2H2BF	3.33026	55	3.50018	47			Other
chr1	ENSG00000203818	HIST2H3PS2	2.76194	33	3.69559	28			Other
chr1	ENSG00000203852	HIST2H3A	2.55001	70	2.48586	75			Other
chr1	ENSG00000203857	HSD3B1	1.57656	255	1.87591	248			Other
chr1	ENSG00000203859	HSD3B2	1.53729	207	1.44188	175			Other
chr1	ENSG00000203864	C1orf137	1.30709	267	1.16005	260			Other
chr1	ENSG00000203910	C1orf146	1.25265	266	1.26793	279			Other
chr1	ENSG00000203943	SAMD13	1.44961	324	1.42033	355			Other
chr1	ENSG00000203963	C1orf141	0.994579	347	0.891431	367			Other
chr1	ENSG00000203965	EFCAB7	1.72908	282	1.66582	335			Other
chr1	ENSG00000203985	LDLRAD1	1.21724	310	1.12432	304			Other
chr1	ENSG00000203995	ZYG11A	0.910503	335	1.12346	313			Other
chr1	ENSG00000204006	C1orf185	2.24913	269	1.97563	289			Other
chr1	ENSG00000204060	FOXO6	1.22095	226	1.81571	231			Other
chr1	ENSG00000204084	INPP5B	0.876014	403	1.12319	381			Other
chr1	ENSG00000204138	PHACTR4	0.893471	531	0.903333	566			Other
chr1	ENSG00000204160	ZDHHC18	1.24293	193	1.37895	210			Other
chr1	ENSG00000204178	MACO1	1.14526	271	1.07649	262			Other
chr1	ENSG00000204219	TCEA3	0.984046	223	1.43392	240			Other
chr1	ENSG00000204362	AL590644.1	1.50265	203	1.75705	182			Other
chr1	ENSG00000204464	C1orf195	1.18801	372	1.22454	383			Other
chr1	ENSG00000204478	PRAMEF20	1.70574	341	1.38838	326			Other
chr1	ENSG00000204479	PRAMEF17	1.8071	189	1.82222	201			Other
chr1	ENSG00000204480	PRAMEF19	2.03055	208	1.90592	207			Other
chr1	ENSG00000204481	PRAMEF14	2.71075	30	2.22349	30			Other
chr1	ENSG00000204501	PRAMEF15	2.90467	43	1.94427	32			Other
chr1	ENSG00000204505	PRAMEF9	2.22283	50	2.275	38			Other
chr1	ENSG00000204510	PRAMEF7	2.49737	45	2.33276	45			Other
chr1	ENSG00000204518	AADACL4	1.10145	186	1.44961	251			Other
chr1	ENSG00000204624	DISP3	1.05658	285	1.25919	292			Other
chr1	ENSG00000204859	ZBTB48	1.2633	304	1.77555	273			Other
chr1	ENSG00000205090	TMEM240	0.893089	170	1.31295	139			Other
chr1	ENSG00000205116	TMEM88B	1.53513	145	1.18482	164			Other
chr1	ENSG00000211452	DIO1	1.19015	444	1.20023	412			Other
chr1	ENSG00000212916	MAP10	1.36333	232	1.36654	199			Other
chr1	ENSG00000213029	SPHAR	1.18228	328	1.2393	313			Other
chr1	ENSG00000213047	DENND1B	1.72155	303	1.38708	319			Other
chr1	ENSG00000213057	C1orf220	1.0319	324	0.977463	299			Other
chr1	ENSG00000213062	AL021068.1	1.16074	375	1.25005	382			Other
chr1	ENSG00000213064	SFT2D2	1.36567	292	1.39036	299			Other
chr1	ENSG00000213085	CFAP45	1.22369	405	1.20713	388			Other
chr1	ENSG00000213088	ACKR1	1.49035	138	1.36528	145			Other
chr1	ENSG00000213171	LINGO4	1.24789	339	1.10193	336			Other
chr1	ENSG00000213190	MLLT11	0.982536	276	1.12188	274			Other
chr1	ENSG00000213240	AC239799.1	4.58182	11	5.43819	16			Other
chr1	ENSG00000213281	NRAS	1.31157	246	1.38603	313			Other
chr1	ENSG00000213366	GSTM2	1.0059	291	1.05458	261			Other
chr1	ENSG00000213512	GBP7	1.28832	342	1.4484	352			Other
chr1	ENSG00000213516	RBMXL1	1.0381	307	1.52552	329			Other
chr1	ENSG00000213625	LEPROT	2.08135	343	2.11857	262			Other
chr1	ENSG00000214114	MYCBP	0.909132	412	0.830923	413			Other
chr1	ENSG00000214193	SH3D21	1.53687	231	1.28331	213			Other
chr1	ENSG00000215695	RSC1A1	1.42222	165	1.2081	166			Other
chr1	ENSG00000215704	CELA2B	1.30922	238	1.30496	230			Other
chr1	ENSG00000215717	TMEM167B	1.31639	380	1.31589	416			Other
chr1	ENSG00000215784	FAM72D	4.81341	41	4.67988	42			Other
chr1	ENSG00000215788	TNFRSF25	1.18271	161	1.76968	160			Other
chr1	ENSG00000215790	SLC35E2A	1.68078	53	1.52841	65			Other
chr1	ENSG00000215808	LINC01139	1.31238	241	1.38594	284			Other
chr1	ENSG00000215845	TSTD1	1.13974	301	1.34105	272			Other
chr1	ENSG00000215853	RPTN	1.27453	257	1.22875	225			Other
chr1	ENSG00000215866	LINC01356	1.08975	195	0.906384	230			Other
chr1	ENSG00000215883	CYB5RL	1.40455	394	1.30737	400			Other
chr1	ENSG00000215906	LACTBL1	0.716749	310	0.876423	298			Other
chr1	ENSG00000215910	C1orf167	0.954385	443	1.06797	388			Other
chr1	ENSG00000215912	TTC34	1.22757	129	1.44599	134			Other
chr1	ENSG00000215915	ATAD3C	1.34811	155	1.76412	157			Other
chr1	ENSG00000219073	CELA3B	1.17361	134	0.876745	121			Other
chr1	ENSG00000219481	NBPF1	1.88412	592	2.19173	639			Other
chr1	ENSG00000221571	RNU6ATAC35P	0.849216	325	1.15203	338			Other
chr1	ENSG00000221888	OR1C1	1.39955	236	1.70291	219			Other
chr1	ENSG00000221953	C1orf229	1.21556	237	1.14262	279			Other
chr1	ENSG00000221978	CCNL2	2.34045	146	0.930643	119			Other
chr1	ENSG00000221986	MYBPHL	1.1911	297	1.44399	253			Other
chr1	ENSG00000222009	BTBD19	1.05905	372	1.01664	338			Other
chr1	ENSG00000222046	DCDC2B	0.848784	394	1.00846	354			Other
chr1	ENSG00000223344	AL359081.1	1.6864	338	1.44569	323			Other
chr1	ENSG00000223382	LINC01778	1.27058	313	0.881214	301			Other
chr1	ENSG00000223479	LINC02238	1.61246	339	1.34224	295			Other
chr1	ENSG00000223643	BX284668.1	2.52085	62	2.4867	62			Other
chr1	ENSG00000223649	AC105275.1	1.06316	399	1.26747	384			Other
chr1	ENSG00000223675	AC093117.1	1.49717	234	2.01979	236			Other
chr1	ENSG00000223720	AL109659.1	1.75487	221	2.12596	206			Other
chr1	ENSG00000223764	LINC02593	1.37191	64	2.01963	80			Other
chr1	ENSG00000223814	AL691459.1	1.49097	379	1.60747	309			Other
chr1	ENSG00000223823	LINC01342	1.542	96	1.0533	85			Other
chr1	ENSG00000223842	AL360093.1	1.40362	260	1.81459	237			Other
chr1	ENSG00000223881	AL157402.1	1.60131	334	1.39798	325			Other
chr1	ENSG00000223883	LINC01707	1.21025	179	1.46436	182			Other
chr1	ENSG00000223906	AC104457.2	1.13959	143	1.30434	113			Other
chr1	ENSG00000223944	AL353604.1	1.38909	201	1.09054	186			Other
chr1	ENSG00000223956	LINC01767	0.86977	320	1.02463	363			Other
chr1	ENSG00000224000	Z97198.1	1.18183	330	1.10537	331			Other
chr1	ENSG00000224051	CPTP	1.33219	110	1.3118	108			Other
chr1	ENSG00000224167	AL390729.1	1.0931	224	0.92503	252			Other
chr1	ENSG00000224174	AL137802.1	1.23439	83	1.6624	110			Other
chr1	ENSG00000224228	AL031599.1	0.88288	312	1.03707	318			Other
chr1	ENSG00000224259	LINC01133	1.51718	311	1.43101	304			Other
chr1	ENSG00000224260	AL023754.1	1.14416	375	1.41609	395			Other
chr1	ENSG00000224286	LINC01142	1.23418	155	1.25082	165			Other
chr1	ENSG00000224326	AL136234.1	1.41655	202	1.59624	202			Other
chr1	ENSG00000224363	FP700111.1	4.75499	41	4.03164	32			Other
chr1	ENSG00000224445	LINC01708	1.56417	226	1.86368	187			Other
chr1	ENSG00000224481	AC245100.1	2.92359	97	2.8624	86			Other
chr1	ENSG00000224535	AC092803.1	0.853115	456	0.62016	470			Other
chr1	ENSG00000224592	AL139158.2	0.797474	197	0.869259	217			Other
chr1	ENSG00000224616	RTCA-AS1	1.53603	186	1.86397	167			Other
chr1	ENSG00000224687	RASAL2-AS1	1.98393	200	1.60925	218			Other
chr1	ENSG00000224698	AL390038.1	2.71317	46	2.21773	37			Other
chr1	ENSG00000224717	AC098936.1	1.25459	300	1.30062	313			Other
chr1	ENSG00000224718	LINC01657	1.46958	315	1.57906	333			Other
chr1	ENSG00000224810	AL355482.1	1.21309	208	1.07532	233			Other
chr1	ENSG00000224857	LINC01691	4.4138	131	3.81145	106			Other
chr1	ENSG00000224939	LINC00184	1.07068	460	1.0651	425			Other
chr1	ENSG00000224943	AL663023.1	1.69231	205	1.43337	211			Other
chr1	ENSG00000224950	AL390066.1	1.21202	246	1.07604	229			Other
chr1	ENSG00000224968	LINC01645	1.34882	323	1.71149	368			Other
chr1	ENSG00000224977	AL121983.1	1.45428	256	0.96998	261			Other
chr1	ENSG00000225006	AL929288.1	2.02699	110	2.01269	113			Other
chr1	ENSG00000225028	AC096541.1	2.13369	122	1.98581	145			Other
chr1	ENSG00000225077	LINC00337	1.29966	316	1.24009	251			Other
chr1	ENSG00000225087	AL583808.1	3.34801	134	3.16566	117			Other
chr1	ENSG00000225172	AC096631.1	1.4951	255	1.72301	288			Other
chr1	ENSG00000225206	MIR137HG	1.39223	224	1.42895	240			Other
chr1	ENSG00000225233	AL592402.1	1.75982	348	1.51228	323			Other
chr1	ENSG00000225285	LINC01770	1.14523	73	1.15608	91			Other
chr1	ENSG00000225325	AL583804.1	1.12357	347	1.18983	345			Other
chr1	ENSG00000225359	AL358393.1	0.935461	352	0.676363	357			Other
chr1	ENSG00000225387	AL591896.1	1.50817	272	1.58939	248			Other
chr1	ENSG00000225446	LINC01763	1.78677	109	1.56072	108			Other
chr1	ENSG00000225506	CYP4A22-AS1	1.87673	331	1.41043	335			Other
chr1	ENSG00000225518	LINC01703	1.47278	311	1.8746	335			Other
chr1	ENSG00000225545	AL162399.1	1.06962	208	0.982715	218			Other
chr1	ENSG00000225554	AL359764.1	1.12299	196	1.53974	187			Other
chr1	ENSG00000225556	C2CD4D	1.05827	352	1.0381	364			Other
chr1	ENSG00000225561	LINC01710	1.02546	224	1.16631	215			Other
chr1	ENSG00000225598	AL606519.1	1.31077	243	1.16787	240			Other
chr1	ENSG00000225605	AC092813.1	1.4384	266	1.51682	236			Other
chr1	ENSG00000225620	AC104463.1	1.3881	147	1.47051	178			Other
chr1	ENSG00000225643	AL606491.1	1.00697	231	0.824862	227			Other
chr1	ENSG00000225656	AL118511.2	1.27977	209	1.57133	163			Other
chr1	ENSG00000225675	LINC01771	1.61619	300	1.53716	305			Other
chr1	ENSG00000225750	AL357500.1	1.18119	442	1.39717	422			Other
chr1	ENSG00000225826	LINC00626	0.796094	313	0.902675	318			Other
chr1	ENSG00000225828	FAM229A	1.75031	146	0.924517	161			Other
chr1	ENSG00000225857	AL162431.1	1.1192	409	0.951963	412			Other
chr1	ENSG00000225880	LINC00115	2.16817	113	2.68069	95			Other
chr1	ENSG00000225919	LINC01745	1.19926	300	1.20841	271			Other
chr1	ENSG00000225982	AL355482.2	1.08793	363	0.878803	352			Other
chr1	ENSG00000226029	LINC01772	1.3078	275	1.41637	297			Other
chr1	ENSG00000226053	LINC01776	1.95326	246	1.64178	251			Other
chr1	ENSG00000226067	LINC00623	4.05316	32	4.92619	23			Other
chr1	ENSG00000226133	AL356289.1	1.62352	326	1.82504	343			Other
chr1	ENSG00000226172	AL139420.1	1.04725	244	1.07423	235			Other
chr1	ENSG00000226208	AL513285.1	1.44679	321	1.40996	328			Other
chr1	ENSG00000226251	AL451060.1	1.15298	435	1.25988	379			Other
chr1	ENSG00000226374	LINC01345	1.0746	362	1.32861	396			Other
chr1	ENSG00000226375	AL022310.1	1.16117	293	0.871806	262			Other
chr1	ENSG00000226476	LINC01748	2.07606	200	2.50197	216			Other
chr1	ENSG00000226486	LINC01035	1.96515	133	1.63089	146			Other
chr1	ENSG00000226487	AL139254.1	1.25491	331	1.47826	352			Other
chr1	ENSG00000226601	AL359979.1	1.62574	331	1.47254	357			Other
chr1	ENSG00000226640	AL357793.1	1.49648	276	1.39868	263			Other
chr1	ENSG00000226643	AL513314.1	0.877872	465	0.993833	498			Other
chr1	ENSG00000226715	LINC01709	1.2516	131	1.59873	138			Other
chr1	ENSG00000226822	AL390036.1	1.21147	359	1.25161	330			Other
chr1	ENSG00000226828	AL591885.1	1.33736	219	1.2918	235			Other
chr1	ENSG00000226835	AC097059.1	1.63135	247	1.82429	266			Other
chr1	ENSG00000226868	AC096637.1	1.1078	463	1.07042	459			Other
chr1	ENSG00000226927	AL451081.1	1.27786	368	1.47818	390			Other
chr1	ENSG00000226938	AC119428.1	1.51705	295	1.3415	301			Other
chr1	ENSG00000227016	AL583808.2	2.07832	123	2.01339	148			Other
chr1	ENSG00000227043	LINC01682	1.71592	225	1.12295	241			Other
[truncated: 25,420 more rows]

## Sheet: Table S10
Supplementary Table 10. Statistics of allelic multi-way enhancer interactions of gene promoters. Higher-order reads with fragments greater than 5 were screened per haplotypes, and the NE (no enhancer interaction), SE (single-enhancer interaction), and ME (multi-enhancer interaction) reads count, mean interacted Enhancers and ME reads ratio were calculated per haplotype for each gene promoter. The…
chrom	ENSG	SYMBL	Mean read enhancer count (h1)	ME_h1	NE_h1	SE_h1	ME_ratio_h1	Mean read enhancer count (h2)	ME_h2	NE_h2	SE_h2	ME_ratio_h2	XCI	ASE_chrX	Imprinted
chr1	ENSG00000000457	SCYL3	0.515152	16	98	51	0.0969697	0.510753	14	107	65	0.0752688			Other
chr1	ENSG00000000460	C1orf112	0.247664	6	168	40	0.0280374	0.290749	14	177	36	0.061674			Other
chr1	ENSG00000000938	FGR	1.0973	54	65	66	0.291892	1.25123	71	64	68	0.349754			Other
chr1	ENSG00000000971	CFH	0.0618557	1	183	10	0.00515464	0.0927835	1	177	16	0.00515464			Other
chr1	ENSG00000001460	STPG1	0.484694	21	126	49	0.107143	0.461538	18	114	37	0.106509			Other
chr1	ENSG00000001461	NIPAL3	0.449761	21	140	48	0.100478	0.464286	21	132	43	0.107143			Other
chr1	ENSG00000004455	AK2	0.481081	34	235	101	0.0918919	0.481108	36	254	107	0.0906801			Other
chr1	ENSG00000004487	KDM1A	1	51	60	99	0.242857	0.989011	40	47	95	0.21978			Other
chr1	ENSG00000006555	TTC22	0.834356	32	68	63	0.196319	0.769697	28	76	61	0.169697			Other
chr1	ENSG00000007341	ST7L	1.43681	186	39	226	0.412417	1.373	155	45	237	0.354691			Other
chr1	ENSG00000007908	SELE	0.253731	5	157	39	0.0248756	0.255814	4	133	35	0.0232558			Other
chr1	ENSG00000007923	DNAJC11	0.513514	43	235	92	0.116216	0.566757	41	210	116	0.111717			Other
chr1	ENSG00000007933	FMO3	0.103261	4	335	29	0.0108696	0.115152	4	297	29	0.0121212			Other
chr1	ENSG00000007968	E2F2	0.806818	45	116	103	0.170455	0.780591	45	110	82	0.189873			Other
chr1	ENSG00000008118	CAMK1G	0.212291	12	296	50	0.0335196	0.227964	11	266	52	0.0334347			Other
chr1	ENSG00000008128	CDK11A	0.915663	16	33	34	0.192771	0.88764	21	37	31	0.235955			Other
chr1	ENSG00000008130	NADK	0.8	24	59	47	0.184615	0.790698	26	57	46	0.20155			Other
chr1	ENSG00000009307	CSDE1	0.356481	14	154	48	0.0648148	0.328638	12	159	42	0.056338			Other
chr1	ENSG00000009709	PAX7	0.174061	8	252	33	0.0273038	0.208904	10	242	40	0.0342466			Other
chr1	ENSG00000009724	MASP2	0.764706	55	138	79	0.202206	0.708609	48	150	104	0.15894			Other
chr1	ENSG00000009780	FAM76A	1.08054	81	122	95	0.271812	1.00325	82	123	103	0.266234			Other
chr1	ENSG00000009790	TRAF3IP3	0.636364	31	129	93	0.12253	0.578199	23	116	72	0.109005			Other
chr1	ENSG00000010072	SPRTN	1.19951	99	39	268	0.243842	1.25707	112	36	241	0.287918			Other
chr1	ENSG00000010165	METTL13	0.401786	27	231	78	0.0803571	0.356707	12	225	91	0.0365854			Other
chr1	ENSG00000010803	SCMH1	1.26409	81	9	247	0.240356	1.23746	67	14	218	0.22408			Other
chr1	ENSG00000010932	FMO1	0.154098	8	267	30	0.0262295	0.200772	5	215	39	0.019305			Other
chr1	ENSG00000011007	ELOA	0.908	55	106	89	0.22	0.991736	67	101	74	0.27686			Other
chr1	ENSG00000011009	LYPLA2	1.25773	65	47	82	0.335052	1.16098	65	66	74	0.317073			Other
chr1	ENSG00000011021	CLCN6	1.55556	143	27	145	0.453968	1.65886	143	23	133	0.478261			Other
chr1	ENSG00000014914	MTMR11	0.961078	81	118	135	0.242515	0.921965	73	122	151	0.210983			Other
chr1	ENSG00000016490	CLCA1	0.130769	1	227	32	0.00384615	0.164122	6	226	30	0.0229008			Other
chr1	ENSG00000016602	CLCA4	0.139738	6	203	20	0.0262009	0.12844	2	193	23	0.00917431			Other
chr1	ENSG00000018625	ATP1A2	0.567669	33	154	79	0.12406	0.546624	36	191	84	0.115756			Other
chr1	ENSG00000020129	NCDN	1.73118	53	0	40	0.569892	1.76289	47	0	50	0.484536			Other
chr1	ENSG00000020633	RUNX3	1.03415	54	75	76	0.263415	1.08213	57	63	87	0.275362			Other
chr1	ENSG00000021852	C8B	0.0875912	3	253	18	0.0109489	0.0683453	0	259	19	0			Other
chr1	ENSG00000023572	GLRX2	0.613793	36	159	95	0.124138	0.693966	36	117	79	0.155172			Other
chr1	ENSG00000023902	PLEKHO1	0.633188	33	124	72	0.144105	0.732	43	132	75	0.172			Other
chr1	ENSG00000023909	GCLM	0.297521	3	89	29	0.0247934	0.360656	8	89	25	0.0655738			Other
chr1	ENSG00000024526	DEPDC1	0.141066	5	279	35	0.015674	0.104615	2	293	30	0.00615385			Other
chr1	ENSG00000025800	KPNA6	0.968059	100	145	162	0.2457	0.97032	111	168	159	0.253425			Other
chr1	ENSG00000026751	SLAMF7	0.862319	53	116	107	0.192029	0.846154	57	130	112	0.190635			Other
chr1	ENSG00000027644	INSRR	0.76259	51	142	85	0.183453	0.779935	62	156	91	0.200647			Other
chr1	ENSG00000027869	SH2D2A	1.64437	128	25	131	0.450704	1.53443	132	28	145	0.432787			Other
chr1	ENSG00000028137	TNFRSF1B	0.584112	28	127	59	0.130841	0.617225	31	119	59	0.148325			Other
chr1	ENSG00000031698	SARS	0.808554	96	215	180	0.195519	0.814645	81	198	158	0.185355			Other
chr1	ENSG00000033122	LRRC7	0.0751174	2	200	11	0.00938967	0.093617	4	217	14	0.0170213			Other
chr1	ENSG00000034971	MYOC	0.28692	11	180	46	0.0464135	0.252033	8	193	45	0.0325203			Other
chr1	ENSG00000035687	ADSS	1.06143	62	56	175	0.211604	1.02685	59	67	172	0.197987			Other
chr1	ENSG00000036549	AC118549.1	0.395257	16	173	64	0.0632411	0.315574	13	182	49	0.0532787			Other
chr1	ENSG00000037637	FBXO42	1.61789	109	0	137	0.443089	1.62679	94	0	115	0.449761			Other
chr1	ENSG00000040487	PQLC2	1.47937	112	0	203	0.355556	1.56537	117	0	166	0.413428			Other
chr1	ENSG00000041988	THAP3	0.911647	58	107	84	0.232932	0.946721	54	92	98	0.221311			Other
chr1	ENSG00000042781	USH2A	0.047619	0	160	8	0	0.0691489	0	175	13	0			Other
chr1	ENSG00000043514	TRIT1	0.70362	67	213	162	0.151584	0.655963	63	229	144	0.144495			Other
chr1	ENSG00000044012	GUCA2B	0.320988	8	120	34	0.0493827	0.322581	13	144	29	0.0698925			Other
chr1	ENSG00000047410	TPR	1.29474	43	0	147	0.226316	1.20968	32	0	154	0.172043			Other
chr1	ENSG00000048707	VPS13D	0.501718	28	186	77	0.0962199	0.528369	29	170	83	0.102837			Other
chr1	ENSG00000049089	COL9A2	0.734756	53	154	121	0.161585	0.678571	41	143	96	0.146429			Other
chr1	ENSG00000049239	H6PD	0.775726	77	182	120	0.203166	0.901266	89	166	140	0.225316			Other
chr1	ENSG00000049245	VAMP3	0.450331	24	201	77	0.0794702	0.46875	27	189	72	0.09375			Other
chr1	ENSG00000049246	PER3	0.541667	13	98	57	0.077381	0.488372	12	105	55	0.0697674			Paternal
chr1	ENSG00000049247	UTS2	0.308219	16	219	57	0.0547945	0.307692	18	221	47	0.0629371			Other
chr1	ENSG00000049249	TNFRSF9	0.49537	17	136	63	0.0787037	0.363248	17	168	49	0.0726496			Other
chr1	ENSG00000050628	PTGER3	0.130137	3	257	32	0.010274	0.1261	3	301	37	0.00879765			Other
chr1	ENSG00000052723	SIKE1	0.357488	10	144	53	0.0483092	0.398268	17	161	53	0.0735931			Other
chr1	ENSG00000053371	AKR7A2	1.41888	116	14	209	0.342183	1.49007	119	14	169	0.39404			Other
chr1	ENSG00000053372	MRTO4	1.49862	141	0	222	0.38843	1.49706	131	0	209	0.385294			Other
chr1	ENSG00000054116	TRAPPC3	1.55634	66	16	60	0.464789	1.69048	59	8	59	0.468254			Other
chr1	ENSG00000054118	THRAP3	0.867521	56	104	74	0.239316	0.898618	48	93	76	0.221198			Other
chr1	ENSG00000054267	ARID4B	1.56897	152	0	196	0.436782	1.53448	117	0	173	0.403448			Other
chr1	ENSG00000054277	OPN3	0.179039	5	194	30	0.0218341	0.146667	3	195	27	0.0133333			Other
chr1	ENSG00000054282	SDCCAG8	1.12791	42	23	193	0.162791	1.15	56	24	220	0.186667			Other
chr1	ENSG00000054392	HHAT	0.333333	18	247	77	0.0526316	0.32376	19	279	85	0.0496084			Other
chr1	ENSG00000054523	KIF1B	0.659142	66	233	144	0.148984	0.693299	56	195	137	0.14433			Other
chr1	ENSG00000055070	SZRD1	1.61789	109	0	137	0.443089	1.62679	94	0	115	0.449761			Other
chr1	ENSG00000055732	MCOLN3	0.293893	13	198	51	0.0496183	0.291525	10	221	64	0.0338983			Other
chr1	ENSG00000057252	SOAT1	0.531977	39	207	98	0.113372	0.540541	35	195	103	0.105105			Other
chr1	ENSG00000057468	MSH4	0.549751	39	225	138	0.0970149	0.549618	40	221	132	0.101781			Other
chr1	ENSG00000057757	PITHD1	1.27948	78	56	95	0.340611	1.08108	70	86	103	0.27027			Other
chr1	ENSG00000058085	LAMC2	0.307692	9	201	63	0.032967	0.234568	11	260	53	0.0339506			Other
chr1	ENSG00000058453	CROCC	0.514286	3	42	25	0.0428571	0.602273	7	44	37	0.0795455			Other
chr1	ENSG00000058668	ATP2B4	0.262658	12	248	56	0.0379747	0.303448	15	219	56	0.0517241			Other
chr1	ENSG00000058673	ZC3H11A	1.30841	83	1	237	0.258567	1.38436	85	0	222	0.276873			Other
chr1	ENSG00000058799	YIPF1	1.36689	158	32	257	0.353468	1.4132	146	19	244	0.356968			Other
chr1	ENSG00000058804	NDC1	0.632353	45	179	116	0.132353	0.595989	35	192	122	0.100287			Other
chr1	ENSG00000059588	TARBP1	0.726098	65	189	133	0.167959	0.78	73	188	139	0.1825			Other
chr1	ENSG00000060642	PIGV	0.977273	36	53	43	0.272727	0.860927	27	65	59	0.178808			Other
chr1	ENSG00000060656	PTPRU	0.314655	15	179	38	0.0646552	0.367347	21	182	42	0.0857143			Other
chr1	ENSG00000060688	SNRNP40	1.44913	135	0	268	0.334988	1.35047	119	0	309	0.278037			Other
chr1	ENSG00000060718	COL11A1	0.159574	4	83	7	0.0425532	0.0693069	1	95	5	0.00990099			Other
chr1	ENSG00000064703	DDX20	1.40281	187	22	290	0.374749	1.46667	173	10	237	0.411905			Other
chr1	ENSG00000064886	CHI3L2	1.0066	68	81	154	0.224422	1.00997	77	95	129	0.255814			Other
chr1	ENSG00000065135	GNAI3	0.840547	84	176	179	0.191344	0.863309	81	176	160	0.194245			Other
chr1	ENSG00000065183	WDR3	1.17727	38	9	173	0.172727	1.1	27	15	138	0.15			Other
chr1	ENSG00000065243	PKN2	0.321429	13	242	81	0.0386905	0.265306	5	223	66	0.0170068			Other
chr1	ENSG00000065526	SPEN	0.681416	30	111	85	0.132743	0.731225	46	120	87	0.181818			Other
chr1	ENSG00000065600	TMEM206	0.698885	44	142	83	0.163569	0.575972	37	167	79	0.130742			Other
chr1	ENSG00000065978	YBX1	1.36082	67	31	96	0.345361	1.19892	60	43	83	0.322581			Other
chr1	ENSG00000066027	PPP2R5A	0.453376	26	204	81	0.0836013	0.401961	16	200	90	0.0522876			Other
chr1	ENSG00000066056	TIE1	0.572727	42	202	86	0.127273	0.628866	36	160	95	0.123711			Other
chr1	ENSG00000066135	KDM4A	1.65086	106	0	126	0.456897	1.65138	107	0	111	0.490826			Other
chr1	ENSG00000066136	NFYC	1.29471	137	74	186	0.345088	1.20361	121	84	183	0.311856			Other
chr1	ENSG00000066185	ZMYND12	1.60338	109	0	128	0.459916	1.49597	96	0	152	0.387097			Other
chr1	ENSG00000066279	ASPM	0.431535	12	151	78	0.0497925	0.344262	9	170	65	0.0368852			Other
chr1	ENSG00000066294	CD84	0.602649	42	182	78	0.139073	0.558442	39	193	76	0.126623			Other
chr1	ENSG00000066322	ELOVL1	0.894231	64	125	123	0.205128	0.964401	78	113	118	0.252427			Other
chr1	ENSG00000066557	LRRC40	1.22305	68	21	180	0.252788	1.35741	85	15	163	0.323194			Other
chr1	ENSG00000067208	EVI5	0.347181	20	245	72	0.0593472	0.278261	15	266	64	0.0434783			Other
chr1	ENSG00000067334	DNTTIP2	0.365639	10	159	58	0.0440529	0.38914	11	148	62	0.0497738			Other
chr1	ENSG00000067533	RRP15	0.198251	5	282	56	0.0145773	0.271812	12	230	56	0.0402685			Other
chr1	ENSG00000067606	PRKCZ	0.381679	9	91	31	0.0687023	0.383333	13	92	15	0.108333			Other
chr1	ENSG00000067704	IARS2	1.08247	65	72	154	0.223368	1.05645	50	51	147	0.201613			Other
chr1	ENSG00000069248	NUP133	0.35	17	277	106	0.0425	0.356974	21	295	107	0.0496454			Other
chr1	ENSG00000069275	NUCKS1	0.615894	36	164	102	0.119205	0.66879	50	164	100	0.159236			Other
chr1	ENSG00000069424	KCNAB2	1.33654	42	23	39	0.403846	0.977011	20	27	40	0.229885			Other
chr1	ENSG00000069702	TGFBR3	0.179039	9	389	60	0.0196507	0.156177	11	375	43	0.025641			Other
chr1	ENSG00000069812	HES2	0.661765	22	73	41	0.161765	0.82963	28	68	39	0.207407			Other
chr1	ENSG00000070759	TESK2	0.943052	112	193	134	0.255125	0.904177	91	179	137	0.223587			Other
chr1	ENSG00000070785	EIF2B3	0.915584	106	204	152	0.229437	0.853234	86	182	134	0.21393			Other
chr1	ENSG00000070831	CDC42	1.5858	151	0	187	0.446746	1.72109	150	0	144	0.510204			Other
chr1	ENSG00000070886	EPHA8	0.276786	11	176	37	0.0491071	0.306533	11	153	35	0.0552764			Other
chr1	ENSG00000072694	FCGR2B	0.363636	0	14	8	0	0.583333	2	12	10	0.0833333			Other
chr1	ENSG00000073754	CD5L	0.234899	3	119	27	0.0201342	0.206667	5	124	21	0.0333333			Other
chr1	ENSG00000073756	PTGS2	0.114094	6	270	22	0.0201342	0.159468	10	263	28	0.0332226			Other
chr1	ENSG00000074800	ENO1	0.650685	65	240	133	0.148402	0.617521	62	258	148	0.132479			Other
chr1	ENSG00000074964	ARHGEF10L	0.242857	6	167	37	0.0285714	0.2287	8	182	33	0.0358744			Other
chr1	ENSG00000075151	EIF4G3	0.560976	20	102	42	0.121951	0.461988	12	106	53	0.0701754			Other
chr1	ENSG00000075391	RASAL2	0.195	9	171	20	0.045	0.123288	4	196	19	0.0182648			Other
chr1	ENSG00000075945	KIFAP3	0.219081	7	232	44	0.024735	0.241379	14	213	34	0.0536398			Other
chr1	ENSG00000076258	FMO4	0.20625	9	263	48	0.028125	0.165663	7	284	41	0.0210843			Other
chr1	ENSG00000076321	KLHL20	0.421053	17	142	50	0.0813397	0.543956	15	108	59	0.0824176			Other
chr1	ENSG00000076356	PLXNA2	0.156915	8	325	43	0.0212766	0.178571	8	311	45	0.021978			Other
chr1	ENSG00000076864	RAP1GAP	0.411067	18	176	59	0.0711462	0.47	29	199	72	0.0966667			Other
chr1	ENSG00000077152	UBE2T	0.538117	23	131	69	0.103139	0.451493	20	172	76	0.0746269			Other
chr1	ENSG00000077157	PPP1R12B	0.469274	16	115	48	0.0893855	0.513889	24	136	56	0.111111			Other
chr1	ENSG00000077254	USP33	0.400943	12	142	58	0.0566038	0.373333	18	161	46	0.08			Other
chr1	ENSG00000077522	ACTN2	0.216949	6	242	47	0.020339	0.260726	12	240	51	0.039604			Other
chr1	ENSG00000077549	CAPZB	1.295	115	29	256	0.2875	1.30353	124	34	267	0.291765			Other
chr1	ENSG00000077585	GPR137B	0.60396	40	163	100	0.132013	0.604361	32	166	123	0.0996885			Other
chr1	ENSG00000078369	GNB1	0.788618	20	54	49	0.162602	0.818182	16	38	45	0.161616			Other
chr1	ENSG00000078618	NRDC	0.78626	23	61	47	0.175573	0.659864	24	80	43	0.163265			Other
chr1	ENSG00000078808	SDF4	2.02941	90	1	45	0.661765	1.7972	79	3	61	0.552448			Other
chr1	ENSG00000078900	TP73	1.47186	91	0	140	0.393939	1.61765	96	0	108	0.470588			Maternal
chr1	ENSG00000079277	MKNK1	1.62745	97	0	107	0.47549	1.57143	76	0	113	0.402116			Other
chr1	ENSG00000079335	CDC14A	0.608974	13	81	62	0.0833333	0.539062	11	73	44	0.0859375			Other
chr1	ENSG00000079739	PGM1	1.21691	67	15	190	0.246324	1.21595	66	13	222	0.219269			Other
chr1	ENSG00000080910	CFHR2	0.142857	0	96	16	0	0.105263	1	86	8	0.0105263			Other
chr1	ENSG00000081019	RSBN1	0.755725	47	122	93	0.179389	0.696078	46	152	108	0.150327			Other
chr1	ENSG00000081026	MAGI3	0.211864	6	193	37	0.0254237	0.230469	9	206	41	0.0351562			Other
chr1	ENSG00000081237	PTPRC	0.393617	16	132	40	0.0851064	0.45	12	103	45	0.075			Other
chr1	ENSG00000081248	CACNA1S	0.298165	8	163	47	0.0366972	0.410138	16	145	56	0.0737327			Other
chr1	ENSG00000081277	PKP1	0.201238	7	266	50	0.0216718	0.263158	9	205	52	0.0338346			Other
chr1	ENSG00000081692	JMJD4	0.401914	12	143	54	0.0574163	0.45625	11	99	50	0.06875			Other
chr1	ENSG00000081721	DUSP12	0.893878	48	95	102	0.195918	0.955285	53	98	95	0.215447			Other
chr1	ENSG00000081870	HSPB11	1.56597	123	0	165	0.427083	1.56923	108	0	152	0.415385			Other
chr1	ENSG00000081985	IL12RB2	0.184906	5	222	38	0.0188679	0.181818	3	210	40	0.0118577			Other
chr1	ENSG00000082482	KCNK2	0.120419	2	170	19	0.0104712	0.154185	4	196	27	0.0176211			Other
chr1	ENSG00000082497	SERTAD4	0.182353	6	146	18	0.0352941	0.165049	4	176	26	0.0194175			Other
chr1	ENSG00000082512	TRAF5	0.444795	22	206	89	0.0694006	0.457055	29	215	82	0.0889571			Other
chr1	ENSG00000083444	PLOD1	0.93633	65	114	88	0.243446	1.03729	82	106	107	0.277966			Other
chr1	ENSG00000084070	SMAP2	0.675497	63	225	165	0.139073	0.706697	65	215	153	0.150115			Other
chr1	ENSG00000084072	PPIE	0.482639	28	190	70	0.0972222	0.576613	33	144	71	0.133065			Other
chr1	ENSG00000084073	ZMPSTE24	0.702128	65	216	142	0.153664	0.68642	54	203	148	0.133333			Other
chr1	ENSG00000084623	EIF3I	2.02473	232	15	117	0.637363	2.0285	247	13	126	0.639896			Other
chr1	ENSG00000084628	NKAIN1	0.354286	25	259	66	0.0714286	0.407821	27	243	88	0.075419			Other
chr1	ENSG00000084636	COL16A1	0.725738	36	113	88	0.151899	0.734982	41	131	111	0.144876			Other
chr1	ENSG00000084652	TXLNA	1.18047	112	109	117	0.331361	1.22995	127	110	137	0.339572			Other
chr1	ENSG00000085433	WDR47	0.85078	95	196	158	0.211581	0.767816	88	211	136	0.202299			Other
chr1	ENSG00000085465	OVGP1	0.42638	26	218	82	0.0797546	0.435897	30	231	90	0.0854701			Other
chr1	ENSG00000085491	SLC25A24	0.211111	7	220	43	0.0259259	0.218868	13	221	31	0.0490566			Other
chr1	ENSG00000085552	IGSF9	0.431746	24	208	83	0.0761905	0.525223	38	205	94	0.11276			Other
chr1	ENSG00000085831	TTC39A	0.332278	12	225	79	0.0379747	0.386293	22	222	77	0.0685358			Other
chr1	ENSG00000085832	EPS15	0.536585	18	115	72	0.0878049	0.491892	14	109	62	0.0756757			Other
chr1	ENSG00000085840	ORC1	1.64257	113	0	136	0.453815	1.55823	106	0	143	0.425703			Other
chr1	ENSG00000085998	POMGNT1	0.706767	19	67	47	0.142857	0.643357	23	81	39	0.160839			Other
chr1	ENSG00000085999	RAD54L	0.625806	19	86	50	0.122581	0.79021	27	67	49	0.188811			Other
chr1	ENSG00000086015	MAST2	0.698565	28	109	72	0.133971	0.718894	38	116	63	0.175115			Other
chr1	ENSG00000086619	ERO1B	0.492537	24	200	111	0.0716418	0.442897	23	225	111	0.0640669			Other
chr1	ENSG00000088035	ALG6	0.315385	10	279	101	0.025641	0.356322	19	303	113	0.0436782			Other
chr1	ENSG00000088280	ASAP3	0.654028	30	109	72	0.14218	0.682028	35	113	69	0.16129			Other
chr1	ENSG00000090020	SLC9A1	0.696035	74	238	142	0.162996	0.639535	55	225	150	0.127907			Other
chr1	ENSG00000090104	RGS1	0.518272	36	191	74	0.119601	0.434921	27	208	80	0.0857143			Other
chr1	ENSG00000090273	NUDC	1.896	157	0	93	0.628	2.09052	158	0	74	0.681034			Other
chr1	ENSG00000090432	MUL1	0.439628	22	210	91	0.0681115	0.375	17	195	68	0.0607143			Other
chr1	ENSG00000090621	PABPC4	0.571848	31	186	124	0.0909091	0.572581	28	197	147	0.0752688			Paternal
chr1	ENSG00000090686	USP48	0.778571	24	68	48	0.171429	0.779141	32	77	54	0.196319			Other
chr1	ENSG00000091483	FH	0.41791	17	176	75	0.0634328	0.340249	14	175	52	0.0580913			Other
chr1	ENSG00000092607	TBX15	0.107143	2	278	28	0.00649351	0.116105	4	240	23	0.0149813			Other
chr1	ENSG00000092621	PHGDH	1.1844	29	8	104	0.205674	1.09816	20	11	132	0.122699			Other
chr1	ENSG00000092847	AGO1	0.690083	36	128	78	0.14876	0.707424	40	125	64	0.174672			Other
chr1	ENSG00000092850	TEKT2	0.969849	52	76	71	0.261307	0.80597	37	88	76	0.18408			Other
chr1	ENSG00000092853	CLSPN	0.823129	27	64	56	0.183673	0.743902	28	77	59	0.170732			Other
chr1	ENSG00000092969	TGFB2	0.153614	6	288	38	0.0180723	0.137457	2	253	36	0.00687285			Other
chr1	ENSG00000092978	GPATCH2	1.13725	28	1	226	0.109804	1.14912	28	0	200	0.122807			Other
chr1	ENSG00000094963	FMO2	0.145455	4	241	30	0.0145455	0.157534	5	253	34	0.0171233			Other
chr1	ENSG00000094975	SUCO	0.271028	8	244	69	0.0249221	0.249231	8	252	65	0.0246154			Other
chr1	ENSG00000097021	ACOT7	0.759563	34	87	62	0.185792	0.772021	35	91	67	0.181347			Other
chr1	ENSG00000097033	SH3GLB1	0.311111	11	167	47	0.0488889	0.304124	7	143	44	0.0360825			Other
chr1	ENSG00000097046	CDC7	0.234637	7	286	65	0.0195531	0.205405	10	305	55	0.027027			Other
chr1	ENSG00000097096	SYDE2	0.251029	8	191	44	0.0329218	0.29368	13	207	49	0.0483271			Other
chr1	ENSG00000099260	PALMD	0.136778	4	289	36	0.0121581	0.142857	6	241	26	0.021978			Other
chr1	ENSG00000107404	DVL1	1.05	8	9	23	0.2	1.17143	11	10	14	0.314286			Other
chr1	ENSG00000116128	BCL9	0.236	9	202	39	0.036	0.244526	6	215	53	0.0218978			Other
chr1	ENSG00000116132	PRRX1	0.283988	14	255	62	0.0422961	0.207006	5	255	54	0.0159236			Other
chr1	ENSG00000116133	DHCR24	0.46114	14	126	53	0.0725389	0.413613	9	123	59	0.0471204			Other
chr1	ENSG00000116138	DNAJC16	1.37168	75	5	146	0.331858	1.6537	123	4	130	0.478599			Other
chr1	ENSG00000116141	MARK1	0.182131	6	244	41	0.0206186	0.210702	7	245	47	0.0234114			Other
chr1	ENSG00000116147	TNR	0.097166	4	227	16	0.0161943	0.247748	9	178	35	0.0405405			Other
chr1	ENSG00000116151	MORN1	1.76768	102	2	94	0.515152	1.62136	105	2	99	0.509709			Other
chr1	ENSG00000116157	GPX7	0.420495	21	192	70	0.0742049	0.498127	25	171	71	0.093633			Other
chr1	ENSG00000116161	CACYBP	0.527869	25	175	105	0.0819672	0.558528	32	176	91	0.107023			Other
chr1	ENSG00000116171	SCP2	0.454094	30	256	117	0.0744417	0.389313	29	275	89	0.0737913			Other
chr1	ENSG00000116183	PAPPA2	0.155738	3	107	12	0.0245902	0.128205	3	140	13	0.0192308			Other
chr1	ENSG00000116191	RALGPS2	0.307692	10	154	44	0.0480769	0.284444	9	171	45	0.04			Other
chr1	ENSG00000116194	ANGPTL1	0.292683	13	162	30	0.0634146	0.165829	3	169	27	0.0150754			Other
chr1	ENSG00000116198	CEP104	1.41146	64	0	128	0.333333	1.41753	68	0	126	0.350515			Other
chr1	ENSG00000116199	FAM20B	0.654618	35	126	88	0.140562	0.608696	33	151	92	0.119565			Other
chr1	ENSG00000116205	TCEANC2	1.50296	126	0	212	0.372781	1.43732	120	0	223	0.349854			Other
chr1	ENSG00000116209	TMEM59	1.50296	126	0	212	0.372781	1.43732	120	0	223	0.349854			Other
chr1	ENSG00000116212	LRRC42	1.53821	127	5	169	0.421927	1.54779	112	4	156	0.411765			Other
chr1	ENSG00000116213	WRAP73	1.41339	95	9	150	0.374016	1.53275	102	12	115	0.445415			Other
chr1	ENSG00000116218	NPHS2	0.171014	5	292	48	0.0144928	0.145714	4	304	42	0.0114286			Other
chr1	ENSG00000116221	MRPL37	0.477848	23	198	95	0.0727848	0.512987	32	192	84	0.103896			Other
chr1	ENSG00000116237	ICMT	1.44571	127	26	197	0.362857	1.44656	103	22	137	0.39313			Other
chr1	ENSG00000116251	RPL22	1.19231	60	53	69	0.32967	1.30952	59	33	76	0.35119			Other
chr1	ENSG00000116254	CHD5	0.634021	27	106	61	0.139175	0.701571	35	104	52	0.183246			Other
chr1	ENSG00000116260	QSOX1	0.474026	26	191	91	0.0844156	0.401434	23	193	63	0.0824373			Other
chr1	ENSG00000116266	STXBP3	0.503817	37	248	108	0.0941476	0.484765	34	233	94	0.0941828			Other
chr1	ENSG00000116273	PHF13	1.85965	129	11	88	0.565789	1.84192	169	10	112	0.580756			Other
chr1	ENSG00000116285	ERRFI1	0.390411	13	104	29	0.0890411	0.290909	7	128	30	0.0424242			Other
chr1	ENSG00000116288	PARK7	0.542986	22	129	70	0.0995475	0.457983	20	152	66	0.0840336			Other
chr1	ENSG00000116299	KIAA1324	0.832962	93	194	162	0.207127	0.794643	87	202	159	0.194196			Other
chr1	ENSG00000116329	OPRD1	0.619681	49	216	111	0.130319	0.602778	46	208	106	0.127778			Other
chr1	ENSG00000116337	AMPD2	0.942857	57	90	98	0.232653	0.97235	54	77	86	0.248848			Other
chr1	ENSG00000116350	SRSF4	0.54878	45	246	119	0.109756	0.597436	47	221	122	0.120513			Other
chr1	ENSG00000116353	MECR	0.417827	29	250	80	0.0807799	0.381356	29	252	73	0.0819209			Other
chr1	ENSG00000116396	KCNC4	0.375691	12	128	41	0.0662983	0.321244	9	141	43	0.0466321			Other
chr1	ENSG00000116406	EDEM3	0.359116	16	253	93	0.0441989	0.333333	14	240	82	0.0416667			Other
chr1	ENSG00000116455	WDR77	1.36585	53	8	103	0.323171	1.23529	42	17	94	0.27451			Other
chr1	ENSG00000116459	ATP5PB	1.3642	53	9	100	0.32716	1.27742	44	13	98	0.283871			Other
chr1	ENSG00000116473	RAP1A	0.445483	25	212	84	0.0778816	0.383234	23	235	76	0.0688623			Other
chr1	ENSG00000116478	HDAC1	1.11298	133	142	141	0.319712	1.18248	129	136	146	0.313869			Other
chr1	ENSG00000116489	CAPZA1	1.44037	183	39	214	0.419725	1.41627	157	39	222	0.375598			Other
chr1	ENSG00000116497	S100PBP	1.22472	100	67	189	0.280899	1.19429	104	69	177	0.297143			Other
chr1	ENSG00000116514	RNF19B	0.803797	56	135	125	0.177215	0.82243	65	148	108	0.202492			Other
chr1	ENSG00000116521	SCAMP3	1.47891	173	96	134	0.42928	1.49492	161	86	147	0.408629			Other
chr1	ENSG00000116525	TRIM62	0.454148	20	154	55	0.0873362	0.545	28	129	43	0.14			Other
chr1	ENSG00000116539	ASH1L	0.903704	60	127	83	0.222222	0.996364	69	112	94	0.250909			Other
chr1	ENSG00000116544	DLGAP3	0.557143	17	86	37	0.121429	0.376147	10	80	19	0.0917431			Other
chr1	ENSG00000116560	SFPQ	0.821739	45	103	82	0.195652	0.662722	25	92	52	0.147929			Other
chr1	ENSG00000116574	RHOU	0.0877193	1	209	18	0.00438596	0.165919	3	189	31	0.0134529			Other
chr1	ENSG00000116580	GON4L	1.94848	184	2	144	0.557576	1.98784	189	1	139	0.574468			Other
chr1	ENSG00000116584	ARHGEF2	1.49622	162	93	142	0.40806	1.53083	169	100	104	0.453083			Other
chr1	ENSG00000116586	LAMTOR2	2.25281	239	6	111	0.671348	2.17337	262	3	133	0.658291			Other
chr1	ENSG00000116604	MEF2D	1.37198	78	54	75	0.376812	1.32515	60	39	64	0.368098			Other
chr1	ENSG00000116641	DOCK7	0.467742	10	77	37	0.0806452	0.396552	14	121	39	0.0804598			Other
chr1	ENSG00000116649	SRM	0.842105	47	108	92	0.190283	0.797665	49	124	84	0.190661			Other
chr1	ENSG00000116661	FBXO2	0.87931	82	151	115	0.235632	1.00279	100	137	122	0.278552			Other
chr1	ENSG00000116663	FBXO6	0.793103	59	157	132	0.16954	0.78553	70	177	140	0.180879			Other
chr1	ENSG00000116667	C1orf21	0.187755	4	206	35	0.0163265	0.210938	6	208	42	0.0234375			Other
chr1	ENSG00000116668	SWT1	1.24468	77	0	299	0.204787	1.30031	74	0	249	0.229102			Other
chr1	ENSG00000116670	MAD2L2	0.902128	60	97	78	0.255319	0.79918	42	108	94	0.172131			Other
chr1	ENSG00000116675	DNAJC6	0.166667	5	265	42	0.0160256	0.137313	5	294	36	0.0149254			Other
chr1	ENSG00000116678	LEPR	1.1895	53	0	290	0.154519	1.20992	48	0	214	0.183206			Other
chr1	ENSG00000116679	IVNS1ABP	1.18667	38	1	186	0.168889	1.22318	46	0	187	0.197425			Other
chr1	ENSG00000116685	KIAA2013	1.17284	80	75	88	0.329218	1.08614	77	86	104	0.28839			Other
chr1	ENSG00000116688	MFN2	0.85654	51	102	84	0.21519	0.918033	52	97	95	0.213115			Other
chr1	ENSG00000116690	PRG4	0.164894	3	160	25	0.0159574	0.183168	4	169	29	0.019802			Other
chr1	ENSG00000116691	MIIP	0.865169	57	114	96	0.213483	0.933775	83	125	94	0.274834			Other
chr1	ENSG00000116698	SMG7	0.496988	27	202	103	0.0813253	0.465374	33	234	94	0.0914127			Other
chr1	ENSG00000116701	NCF2	0.644809	23	96	64	0.125683	0.540404	26	125	47	0.131313			Other
chr1	ENSG00000116703	PDC	0.128571	3	186	21	0.0142857	0.125714	1	155	19	0.00571429			Other
chr1	ENSG00000116704	SLC35D1	0.255639	6	206	54	0.0225564	0.342857	10	196	74	0.0357143			Other
chr1	ENSG00000116711	PLA2G4A	0.111675	5	181	11	0.0253807	0.131818	6	199	15	0.0272727			Other
chr1	ENSG00000116717	GADD45A	0.248466	9	256	61	0.0276074	0.225256	5	234	54	0.0170648			Other
chr1	ENSG00000116721	PRAMEF1	0.170732	1	35	5	0.0243902	0.307692	1	28	10	0.025641			Other
chr1	ENSG00000116726	PRAMEF12	0.230159	9	208	35	0.0357143	0.209821	11	193	20	0.0491071			Other
chr1	ENSG00000116729	WLS	0.0707965	2	212	12	0.00884956	0.109649	1	204	23	0.00438596			Other
chr1	ENSG00000116731	PRDM2	0.475845	37	271	106	0.089372	0.433333	26	236	98	0.0722222			Other
chr1	ENSG00000116741	RGS2	0.206612	5	101	15	0.0413223	0.141667	2	105	13	0.0166667			Other
chr1	ENSG00000116745	RPE65	0.0823245	3	383	27	0.00726392	0.078125	4	358	22	0.0104167			Other
chr1	ENSG00000116747	TROVE2	1.452	98	26	126	0.392	1.43772	107	22	152	0.380783			Other
chr1	ENSG00000116748	AMPD1	0.290429	13	230	60	0.0429043	0.36	17	247	86	0.0485714			Other
chr1	ENSG00000116750	UCHL5	1.62326	93	0	122	0.432558	1.57959	105	0	140	0.428571			Other
chr1	ENSG00000116752	BCAS2	0.341808	17	251	86	0.0480226	0.326531	18	250	75	0.0524781			Other
chr1	ENSG00000116754	SRSF11	1.32653	67	0	178	0.273469	1.44398	83	0	158	0.344398			Other
chr1	ENSG00000116761	CTH	0.314136	13	277	92	0.0340314	0.296203	14	293	88	0.035443			Other
chr1	ENSG00000116771	AGMAT	0.649573	33	124	77	0.141026	0.557447	27	138	70	0.114894			Other
chr1	ENSG00000116774	OLFML3	0.378747	22	257	88	0.0599455	0.275956	17	285	64	0.0464481			Other
chr1	ENSG00000116783	TNNI3K	0.0956175	4	233	14	0.0159363	0.0660793	1	213	13	0.00440529			Other
chr1	ENSG00000116785	CFHR3	0.125	4	172	16	0.0208333	0.0888889	0	164	16	0			Other
chr1	ENSG00000116786	PLEKHM2	1.29707	89	43	107	0.372385	1.24537	70	34	112	0.324074			Other
chr1	ENSG00000116791	CRYZ	1.09211	54	22	304	0.142105	1.10704	48	16	291	0.135211			Other
chr1	ENSG00000116793	PHTF1	0.639706	40	149	83	0.147059	0.624535	35	143	91	0.130112			Other
chr1	ENSG00000116809	ZBTB17	0.656627	42	167	123	0.126506	0.742515	51	151	132	0.152695			Other
chr1	ENSG00000116815	CD58	0.623853	32	115	71	0.146789	0.539216	22	122	60	0.107843			Other
chr1	ENSG00000116819	TFAP2E	0.728723	38	100	50	0.202128	0.683908	24	87	63	0.137931			Other
chr1	ENSG00000116824	CD2	0.265957	13	224	45	0.0460993	0.235294	6	190	42	0.0252101			Other
chr1	ENSG00000116830	TTF2	0.387097	19	171	58	0.0766129	0.522523	24	138	60	0.108108			Other
chr1	ENSG00000116833	NR5A2	0.138743	4	333	45	0.0104712	0.174479	11	330	43	0.0286458			Other
chr1	ENSG00000116852	KIF21B	0.49217	41	277	129	0.0917226	0.531453	43	270	148	0.0932755			Other
chr1	ENSG00000116857	TMEM9	0.393939	24	230	76	0.0727273	0.368098	19	232	75	0.0582822			Other
chr1	ENSG00000116863	ADPRHL2	1.0915	46	41	66	0.300654	1.0493	33	39	70	0.232394			Other
chr1	ENSG00000116871	MAP7D1	1.70149	69	4	61	0.514925	1.61719	55	9	64	0.429688			Other
chr1	ENSG00000116874	WARS2	0.247706	9	174	35	0.0412844	0.256039	5	160	42	0.0241546			Other
chr1	ENSG00000116882	HAO2	0.13125	2	280	38	0.00625	0.181132	7	224	34	0.0264151			Other
chr1	ENSG00000116885	OSCP1	0.788679	51	119	95	0.192453	0.929448	79	134	113	0.242331			Other
chr1	ENSG00000116898	MRPS15	0.688811	44	145	97	0.153846	0.851064	50	104	81	0.212766			Other
chr1	ENSG00000116903	EXOC8	1.25815	95	18	255	0.258152	1.32865	106	12	238	0.297753			Other
chr1	ENSG00000116906	GNPAT	1.31383	99	0	277	0.263298	1.28784	93	0	310	0.230769			Other
chr1	ENSG00000116918	TSNAX	1.34449	137	0	371	0.269685	1.36289	141	0	344	0.290722			Other
chr1	ENSG00000116922	C1orf109	1.63566	123	10	125	0.476744	1.57258	105	9	134	0.423387			Other
chr1	ENSG00000116954	RRAGC	0.858859	71	138	124	0.213213	0.845426	73	137	107	0.230284			Other
chr1	ENSG00000116962	NID1	0.64539	60	225	138	0.141844	0.558603	44	232	125	0.109726			Other
chr1	ENSG00000116977	LGALS8	0.514045	30	210	116	0.0842697	0.518421	36	231	113	0.0947368			Other
chr1	ENSG00000116981	NT5C1A	0.462162	33	240	97	0.0891892	0.571429	40	196	107	0.116618			Other
chr1	ENSG00000116983	HPCAL4	0.482625	24	172	63	0.0926641	0.567568	28	126	68	0.126126			Other
chr1	ENSG00000116984	MTR	0.403774	19	180	66	0.0716981	0.357724	15	175	56	0.0609756			Other
chr1	ENSG00000116985	BMP8B	0.813433	50	117	101	0.186567	0.830508	47	98	91	0.199153			Other
chr1	ENSG00000116990	MYCL	0.740984	43	137	125	0.140984	0.644231	44	167	101	0.141026			Other
chr1	ENSG00000116991	SIPA1L2	0.169492	11	311	32	0.0310734	0.11254	3	279	29	0.0096463			Other
chr1	ENSG00000116996	ZP4	0.107143	4	257	19	0.0142857	0.110266	2	236	25	0.00760456			Other
chr1	ENSG00000117000	RLF	0.741758	60	174	130	0.164835	0.60355	36	177	125	0.106509			Other
chr1	ENSG00000117009	KMO	0.374468	10	159	66	0.0425532	0.305455	16	209	50	0.0581818			Other
chr1	ENSG00000117010	ZNF684	0.686099	68	227	151	0.152466	0.849105	81	167	143	0.207161			Other
chr1	ENSG00000117013	KCNQ4	0.532143	26	163	91	0.0928571	0.565359	35	180	91	0.114379			Other
chr1	ENSG00000117016	RIMS3	0.649289	33	112	66	0.156398	0.605556	18	100	62	0.1			Other
chr1	ENSG00000117020	AKT3	0.216216	7	123	18	0.0472973	0.181208	3	125	21	0.0201342			Other
chr1	ENSG00000117036	ETV3	0.715556	32	110	83	0.142222	0.463519	20	150	63	0.0858369			Other
chr1	ENSG00000117054	ACADM	0.520833	27	195	114	0.0803571	0.438538	18	188	95	0.0598007			Other
chr1	ENSG00000117069	ST6GALNAC5	0.101796	4	305	25	0.011976	0.0941558	4	283	21	0.012987			Other
chr1	ENSG00000117090	SLAMF1	0.785455	55	137	83	0.2	0.728188	47	144	107	0.157718			Other
chr1	ENSG00000117091	CD48	0.955017	67	115	107	0.231834	0.984127	77	119	119	0.244444			Other
chr1	ENSG00000117114	ADGRL2	0.0661765	4	259	9	0.0147059	0.0702479	1	227	14	0.00413223			Other
chr1	ENSG00000117115	PADI2	0.253219	7	182	44	0.0300429	0.37551	14	175	56	0.0571429			Other
chr1	ENSG00000117118	SDHB	0.428571	13	115	47	0.0742857	0.481928	15	107	44	0.0903614			Other
chr1	ENSG00000117122	MFAP2	0.387387	17	154	51	0.0765766	0.467337	16	128	55	0.080402			Other
chr1	ENSG00000117133	RPF1	1.0906	68	55	175	0.228188	1.19257	77	42	177	0.260135			Other
chr1	ENSG00000117139	KDM5B	0.453875	25	180	66	0.0922509	0.589091	30	150	95	0.109091			Other
chr1	ENSG00000117143	UAP1	0.489627	25	156	60	0.103734	0.428	21	171	58	0.084			Other
chr1	ENSG00000117148	ACTL8	0.180488	8	176	21	0.0390244	0.156098	5	178	22	0.0243902			Other
chr1	ENSG00000117151	CTBS	0.454545	22	169	73	0.0833333	0.462406	23	169	74	0.0864662			Other
chr1	ENSG00000117152	RGS4	0.134752	3	247	32	0.0106383	0.0984848	2	241	21	0.00757576			Other
chr1	ENSG00000117153	KLHL12	0.739583	49	147	92	0.170139	0.66065	37	147	93	0.133574			Other
chr1	ENSG00000117154	IGSF21	0.138075	3	211	25	0.0125523	0.117904	4	207	18	0.0174672			Other
chr1	ENSG00000117155	SSX2IP	0.386598	19	257	112	0.0489691	0.424691	30	268	107	0.0740741			Other
chr1	ENSG00000117174	ZNHIT6	0.230994	5	268	69	0.0146199	0.209877	7	263	54	0.0216049			Other
chr1	ENSG00000117215	PLA2G2D	0.378698	20	236	82	0.0591716	0.307692	17	248	60	0.0523077			Other
chr1	ENSG00000117222	RBBP5	0.47619	27	194	73	0.0918367	0.47351	25	193	84	0.0827815			Other
chr1	ENSG00000117226	GBP3	0.295455	15	265	72	0.0426136	0.28934	16	301	77	0.0406091			Other
chr1	ENSG00000117228	GBP1	0.233227	7	250	56	0.0223642	0.21519	7	255	54	0.0221519			Other
chr1	ENSG00000117245	KIF17	0.412844	10	143	65	0.0458716	0.480851	21	148	66	0.0893617			Other
chr1	ENSG00000117262	GPR89A	0.568966	6	36	16	0.103448	0.616667	9	32	19	0.15			Other
chr1	ENSG00000117266	CDK18	0.34891	13	230	78	0.0404984	0.380137	20	206	66	0.0684932			Other
chr1	ENSG00000117280	RAB29	0.555066	28	142	57	0.123348	0.541667	19	111	62	0.0989583			Other
chr1	ENSG00000117281	CD160	0.75419	31	82	66	0.173184	0.554945	23	109	50	0.126374			Other
chr1	ENSG00000117298	ECE1	0.492806	21	168	89	0.0755396	0.426829	29	223	76	0.0884146			Other
chr1	ENSG00000117305	HMGCL	1.09302	51	67	54	0.296512	1.09	57	66	77	0.285			Other
chr1	ENSG00000117308	GALE	1.44949	80	49	69	0.40404	1.21364	72	56	92	0.327273			Other
chr1	ENSG00000117318	ID3	0.894068	51	96	89	0.216102	0.778281	40	100	81	0.180995			Other
chr1	ENSG00000117322	CR2	0.456522	16	150	64	0.0695652	0.495536	20	139	65	0.0892857			Other
chr1	ENSG00000117335	CD46	0.514388	27	170	81	0.0971223	0.519084	29	163	70	0.110687			Other
chr1	ENSG00000117360	PRPF3	0.833741	78	175	156	0.190709	0.870536	93	192	163	0.207589			Other
chr1	ENSG00000117362	APH1A	1.56404	189	30	187	0.465517	1.51435	190	53	175	0.454545			Other
chr1	ENSG00000117385	P3H1	1.6119	162	6	185	0.458924	1.60845	162	6	187	0.456338			Other
chr1	ENSG00000117394	SLC2A1	1.58582	115	9	144	0.429104	1.44898	91	5	149	0.371429			Other
chr1	ENSG00000117395	EBNA1BP2	0.545139	34	172	82	0.118056	0.579545	32	153	79	0.121212			Other
chr1	ENSG00000117399	CDC20	0.889213	69	136	138	0.201166	0.854286	80	160	110	0.228571			Other
chr1	ENSG00000117400	MPL	0.679487	46	172	94	0.147436	0.668657	48	183	104	0.143284			Other
chr1	ENSG00000117407	ARTN	0.584337	17	93	56	0.10241	0.797872	41	89	58	0.218085			Other
chr1	ENSG00000117408	IPO13	0.869707	73	140	94	0.237785	0.677536	36	146	94	0.130435			Other
chr1	ENSG00000117410	ATP6V0B	1.67539	91	10	90	0.47644	1.68	91	14	70	0.52			Other
chr1	ENSG00000117411	B4GALT2	1.46067	74	22	82	0.41573	1.55294	75	25	70	0.441176			Other
chr1	ENSG00000117419	ERI3	0.410646	14	180	69	0.0532319	0.393333	16	202	82	0.0533333			Other
chr1	ENSG00000117425	PTCH2	0.889231	76	145	104	0.233846	0.832168	53	132	101	0.185315			Other
chr1	ENSG00000117448	AKR1A1	1.14851	99	99	105	0.326733	1.17204	92	92	95	0.329749			Other
chr1	ENSG00000117450	PRDX1	1.12397	78	92	72	0.322314	1.14523	77	80	84	0.319502			Other
chr1	ENSG00000117461	PIK3R3	0.716667	15	59	46	0.125	0.813084	21	49	37	0.196262			Other
chr1	ENSG00000117472	TSPAN1	0.808383	34	80	53	0.203593	0.746667	31	83	36	0.206667			Other
chr1	ENSG00000117475	BLZF1	0.256831	11	283	72	0.0300546	0.241627	15	338	65	0.0358852			Other
chr1	ENSG00000117477	CCDC181	0.295031	12	244	66	0.0372671	0.304054	9	215	72	0.0304054			Other
chr1	ENSG00000117479	SLC19A2	1.16	71	21	308	0.1775	1.21411	77	12	308	0.193955			Other
chr1	ENSG00000117480	FAAH	0.52071	20	111	38	0.118343	0.546341	20	121	64	0.097561			Other
chr1	ENSG00000117481	NSUN4	0.811321	38	74	47	0.238994	0.774869	41	93	57	0.21466			Other
chr1	ENSG00000117500	TMED5	1.46262	71	0	143	0.331776	1.45714	92	1	152	0.37551			Other
chr1	ENSG00000117501	MROH9	0.160584	8	240	26	0.0291971	0.118081	4	243	24	0.0147601			Other
chr1	ENSG00000117505	DR1	0.49	16	119	65	0.08	0.423645	13	139	51	0.0640394			Other
chr1	ENSG00000117519	CNN3	0.125	5	157	6	0.0297619	0.0939227	1	165	15	0.00552486			Other
chr1	ENSG00000117523	PRRC2C	0.358166	18	248	83	0.0515759	0.408805	19	210	89	0.0597484			Other
chr1	ENSG00000117525	F3	0.117647	1	196	24	0.00452489	0.109948	1	171	19	0.0052356			Other
chr1	ENSG00000117528	ABCD3	0.229572	8	208	41	0.0311284	0.228464	7	214	46	0.0262172			Other
chr1	ENSG00000117533	VAMP4	0.292929	12	222	63	0.040404	0.376812	17	233	95	0.0492754			Other
chr1	ENSG00000117543	DPH5	0.246094	6	200	50	0.0234375	0.315217	11	203	62	0.0398551			Other
chr1	ENSG00000117560	FASLG	0.237852	9	309	73	0.0230179	0.265957	12	289	75	0.0319149			Other
chr1	ENSG00000117569	PTBP2	0.125926	5	241	24	0.0185185	0.132404	4	254	29	0.0139373			Other
chr1	ENSG00000117586	TNFSF4	0.390671	18	228	97	0.0524781	0.373377	18	216	74	0.0584416			Other
chr1	ENSG00000117592	PRDX6	0.365079	18	220	77	0.0571429	0.502525	36	243	117	0.0909091			Other
chr1	ENSG00000117593	DARS2	1.36147	144	0	318	0.311688	1.48165	160	1	275	0.366972			Other
chr1	ENSG00000117594	HSD11B1	0.247148	9	208	46	0.0342205	0.345725	26	204	39	0.0966543			Other
chr1	ENSG00000117595	IRF6	0.481928	25	158	66	0.100402	0.457249	18	169	82	0.0669145			Other
chr1	ENSG00000117597	UTP25	0.454918	17	153	74	0.0696721	0.360153	18	189	54	0.0689655			Other
chr1	ENSG00000117598	PLPPR5	0.0824742	2	91	4	0.0206186	0.0392157	0	98	4	0			Other
chr1	ENSG00000117600	PLPPR4	0.0903955	3	165	9	0.0169492	0.0824742	3	183	8	0.0154639			Other
chr1	ENSG00000117601	SERPINC1	0.434402	26	224	93	0.0758017	0.416667	27	240	93	0.075			Other
chr1	ENSG00000117602	RCAN3	0.39322	23	208	64	0.0779661	0.356322	17	189	55	0.0651341			Other
chr1	ENSG00000117614	SYF2	0.950207	61	91	89	0.253112	0.84058	45	87	75	0.217391			Other
chr1	ENSG00000117616	RSRP1	1.52761	78	17	68	0.478528	1.42236	59	15	87	0.36646			Other
chr1	ENSG00000117620	SLC35A3	1.33218	91	15	183	0.314879	1.28616	94	23	201	0.295597			Other
chr1	ENSG00000117625	RCOR3	0.414634	17	165	64	0.0691057	0.412698	20	169	63	0.0793651			Other
chr1	ENSG00000117632	STMN1	0.825926	48	119	103	0.177778	0.883803	64	122	98	0.225352			Other
chr1	ENSG00000117640	MTFR1L	0.927184	46	87	73	0.223301	0.765363	35	90	54	0.195531			Other
chr1	ENSG00000117643	MAN1C1	0.690217	30	102	52	0.163043	0.651515	22	107	69	0.111111			Other
chr1	ENSG00000117650	NEK2	0.636585	57	221	132	0.139024	0.538991	43	252	141	0.0986239			Other
chr1	ENSG00000117676	RPS6KA1	1.02586	97	124	127	0.278736	1	96	137	124	0.268908			Other
chr1	ENSG00000117682	DHDDS	0.898204	78	136	120	0.233533	1.02162	99	138	133	0.267568			Other
chr1	ENSG00000117691	NENF	0.597087	47	226	139	0.114078	0.67268	58	202	128	0.149485			Other
chr1	ENSG00000117697	NSL1	1.52486	149	0	213	0.411602	1.49862	144	0	219	0.396694			Other
chr1	ENSG00000117707	PROX1	0.181319	7	157	18	0.0384615	0.0710059	0	157	12	0			Other
chr1	ENSG00000117713	ARID1A	0.806931	38	95	69	0.188119	0.8	36	79	70	0.194595			Other
chr1	ENSG00000117724	CENPF	0.284047	11	200	46	0.0428016	0.229927	10	221	43	0.0364964			Other
chr1	ENSG00000117748	RPA2	0.934985	78	143	102	0.241486	1.02055	78	112	102	0.267123			Other
chr1	ENSG00000117751	PPP1R8	1.11111	78	91	83	0.309524	1.13953	80	83	95	0.310078			Other
chr1	ENSG00000117758	STX12	0.995455	63	93	64	0.286364	1.00735	74	104	94	0.272059			Other
chr1	ENSG00000117791	MARC2	0.213873	8	282	56	0.0231214	0.193038	7	264	45	0.0221519			Other
chr1	ENSG00000117834	SLC5A9	0.105085	8	272	15	0.0271186	0.0820312	2	237	17	0.0078125			Other
chr1	ENSG00000117859	OSBPL9	0.517401	45	256	130	0.104408	0.532258	39	252	143	0.0898618			Other
chr1	ENSG00000117862	TXNDC12	1.60094	89	0	124	0.41784	1.69469	111	0	115	0.49115			Other
chr1	ENSG00000118193	KIF14	0.545643	50	278	154	0.103734	0.506608	40	273	141	0.0881057			Other
chr1	ENSG00000118194	TNNT2	0.314894	14	178	43	0.0595745	0.2607	8	199	50	0.0311284			Other
chr1	ENSG00000118197	DDX59	1.34722	93	13	182	0.322917	1.27891	88	21	185	0.29932			Other
chr1	ENSG00000118200	CAMSAP2	0.486842	20	140	68	0.0877193	0.455357	19	146	59	0.0848214			Other
chr1	ENSG00000118217	ATF6	0.741742	50	149	134	0.15015	0.840782	70	165	123	0.195531			Other
chr1	ENSG00000118292	C1orf54	1.62176	189	25	172	0.489637	1.64879	184	22	167	0.493298			Other
chr1	ENSG00000118298	CA14	0.967568	91	135	144	0.245946	0.983425	89	129	144	0.245856			Other
chr1	ENSG00000118454	ANKRD13C	1.3	93	0	267	0.258333	1.30747	90	0	258	0.258621			Other
chr1	ENSG00000118473	SGIP1	0.094697	2	243	19	0.00757576	0.09375	2	263	23	0.00694444			Other
chr1	ENSG00000118655	DCLRE1B	1.61514	159	0	158	0.501577	1.67347	174	0	169	0.507289			Other
chr1	ENSG00000118729	CASQ2	0.164444	6	198	21	0.0266667	0.173709	3	179	31	0.0140845			Other
chr1	ENSG00000118733	OLFM3	0.0314465	1	155	3	0.00628931	0.0943396	1	147	11	0.00628931			Other
chr1	ENSG00000118873	RAB3GAP2	0.308475	13	229	53	0.0440678	0.373737	21	214	62	0.0707071			Other
chr1	ENSG00000119280	C1orf198	0.272251	19	301	62	0.0497382	0.240409	12	311	68	0.0306905			Other
chr1	ENSG00000119283	TRIM67	0.259109	13	200	34	0.0526316	0.21097	6	194	37	0.0253165			Other
chr1	ENSG00000119285	HEATR1	0.390977	19	183	64	0.0714286	0.426877	17	167	69	0.0671937			Other
chr1	ENSG00000119535	CSF3R	0.650862	32	123	77	0.137931	0.558252	21	117	68	0.101942			Other
chr1	ENSG00000120332	TNN	0.243827	11	256	57	0.0339506	0.275618	13	225	45	0.0459364			Other
chr1	ENSG00000120333	MRPS14	0.384848	26	232	72	0.0787879	0.545932	43	227	111	0.112861			Other
chr1	ENSG00000120334	CENPL	1.36147	144	0	318	0.311688	1.48506	160	0	275	0.367816			Other
chr1	ENSG00000120337	TNFSF18	0.150794	3	217	32	0.0119048	0.176271	7	250	38	0.0237288			Other
chr1	ENSG00000120341	SEC16B	0.0952381	2	211	18	0.00865801	0.138249	3	190	24	0.0138249			Other
chr1	ENSG00000120370	GORAB	0.416667	21	222	93	0.0625	0.378007	17	203	71	0.0584192			Other
chr1	ENSG00000120656	TAF12	1.85237	204	7	148	0.568245	1.86472	222	6	149	0.588859			Other
chr1	ENSG00000120937	NPPB	0.755102	60	166	117	0.174927	0.678571	51	181	104	0.151786			Other
chr1	ENSG00000120942	UBIAD1	0.924731	66	110	103	0.236559	0.94081	81	132	108	0.252336			Other
chr1	ENSG00000120948	TARDBP	1.47872	98	3	181	0.347518	1.49477	103	4	180	0.358885			Other
chr1	ENSG00000120949	TNFRSF8	0.969432	55	83	91	0.240175	0.980989	75	100	88	0.285171			Other
chr1	ENSG00000120952	PRAMEF2	0.133333	4	121	10	0.0296296	0.156716	5	119	10	0.0373134			Other
chr1	ENSG00000121310	ECHDC2	0.454094	30	256	117	0.0744417	0.389313	29	275	89	0.0737913			Other
chr1	ENSG00000121446	RGSL1	0.335165	7	130	45	0.0384615	0.329609	5	128	46	0.027933			Other
chr1	ENSG00000121454	LHX4	0.342857	8	125	42	0.0457143	0.371951	10	114	40	0.0609756			Other
chr1	ENSG00000121481	RNF2	0.324219	9	185	62	0.0351562	0.308271	7	192	67	0.0263158			Other
chr1	ENSG00000121486	TRMT1L	1.24468	77	0	299	0.204787	1.30031	74	0	249	0.229102			Other
chr1	ENSG00000121634	GJA8	0.416667	12	120	48	0.0666667	0.348958	10	141	41	0.0520833			Other
chr1	ENSG00000121644	DESI2	0.393617	26	260	90	0.0691489	0.397333	23	253	99	0.0613333			Other
chr1	ENSG00000121753	ADGRB2	0.584034	33	141	64	0.138655	0.710843	37	137	75	0.148594			Other
chr1	ENSG00000121764	HCRTR1	0.60515	31	135	67	0.133047	0.674312	35	115	68	0.16055			Other
chr1	ENSG00000121766	ZCCHC17	1.41905	138	9	273	0.328571	1.3	120	17	313	0.266667			Other
chr1	ENSG00000121769	FABP3	0.36	22	266	87	0.0586667	0.427461	33	266	87	0.0854922			Other
chr1	ENSG00000121774	KHDRBS1	0.951299	84	132	92	0.272727	1.05424	76	110	109	0.257627			Other
chr1	ENSG00000121775	TMEM39B	0.954436	109	157	151	0.261391	1.00887	113	169	169	0.250554			Other
chr1	ENSG00000121851	POLR3GL	2.0411	148	0	71	0.675799	2.17277	129	0	62	0.675393			Other
chr1	ENSG00000121900	TMEM54	0.557252	36	161	65	0.137405	0.473118	26	178	75	0.09319			Other
chr1	ENSG00000121903	ZSCAN20	0.397436	24	263	103	0.0615385	0.404908	27	227	72	0.0828221			Other
chr1	ENSG00000121904	CSMD2	0.122807	5	206	17	0.0219298	0.185714	11	239	30	0.0392857			Other
chr1	ENSG00000121905	HPCA	0.518519	36	190	71	0.121212	0.51049	30	182	74	0.104895			Other
chr1	ENSG00000121931	LRIF1	0.447222	34	241	85	0.0944444	0.420513	32	266	92	0.0820513			Other
chr1	ENSG00000121933	TMIGD3	0.472376	31	229	102	0.0856354	0.383686	19	226	86	0.0574018			Other
chr1	ENSG00000121940	CLCC1	1.55112	149	0	252	0.371571	1.51596	145	0	231	0.385638			Other
chr1	ENSG00000121957	GPSM2	0.455307	25	230	103	0.0698324	0.516418	41	214	80	0.122388			Other
chr1	ENSG00000122176	FMOD	0.286624	12	240	62	0.0382166	0.337793	15	217	67	0.0501672			Other
chr1	ENSG00000122180	MYOG	0.323383	14	154	33	0.0696517	0.310044	15	178	36	0.0655022			Other
chr1	ENSG00000122188	LAX1	0.343669	24	281	82	0.0620155	0.374083	24	287	98	0.0586797			Other
chr1	ENSG00000122218	COPA	1.55072	115	8	153	0.416667	1.58562	118	5	169	0.40411			Other
chr1	ENSG00000122223	CD244	0.594235	64	271	116	0.141907	0.645309	62	245	130	0.141876			Other
chr1	ENSG00000122224	LY9	0.974874	102	143	153	0.256281	0.969838	109	165	157	0.2529			Other
chr1	ENSG00000122406	RPL5	0.434018	21	216	104	0.0615836	0.423567	23	209	82	0.0732484			Other
chr1	ENSG00000122417	ODF2L	0.181818	5	176	28	0.0239234	0.201754	6	188	34	0.0263158			Other
chr1	ENSG00000122420	PTGFR	0.056391	1	252	13	0.0037594	0.0657439	1	271	17	0.00346021			Other
chr1	ENSG00000122432	SPATA1	1.43561	103	2	159	0.390152	1.46333	109	0	191	0.363333			Other
chr1	ENSG00000122435	TRMT13	1.4375	73	0	135	0.350962	1.46696	85	0	142	0.374449			Other
chr1	ENSG00000122477	LRRC39	0.440613	21	173	67	0.0804598	0.408922	23	190	56	0.0855019			Other
chr1	ENSG00000122481	RWDD3	0.191589	6	179	29	0.0280374	0.178771	1	148	30	0.00558659			Other
chr1	ENSG00000122482	ZNF644	0.352941	14	170	54	0.0588235	0.297071	11	182	46	0.0460251			Other
chr1	ENSG00000122483	CCDC18	1.39827	74	10	147	0.320346	1.33333	94	24	158	0.34058			Other
chr1	ENSG00000122484	RPAP2	1.28182	72	0	258	0.218182	1.18261	55	0	290	0.15942			Other
chr1	ENSG00000123080	CDKN2C	0.579235	20	102	61	0.10929	0.545455	17	101	58	0.0965909			Other
chr1	ENSG00000123091	RNF11	1.29197	75	18	181	0.273723	1.21012	58	18	181	0.225681			Other
chr1	ENSG00000123472	ATPAF1	0.872611	32	60	65	0.203822	0.840278	26	56	62	0.180556			Other
chr1	ENSG00000123473	STIL	0.534014	32	177	85	0.108844	0.482014	21	173	84	0.0755396			Other
chr1	ENSG00000123684	LPGAT1	0.561308	41	214	112	0.111717	0.556818	37	198	117	0.105114			Other
chr1	ENSG00000123685	BATF3	0.534247	44	256	138	0.100457	0.496815	44	291	136	0.0934183			Other
chr1	ENSG00000123689	G0S2	0.285714	4	129	42	0.0228571	0.21659	7	178	32	0.0322581			Other
chr1	ENSG00000123836	PFKFB2	0.481928	19	156	74	0.0763052	0.425101	21	167	59	0.0850202			Other
chr1	ENSG00000123838	C4BPA	0.317365	12	242	80	0.0359281	0.293706	12	215	59	0.041958			Other
chr1	ENSG00000123843	C4BPB	0.368056	23	301	108	0.0532407	0.408521	32	271	96	0.0802005			Other
chr1	ENSG00000125459	MSTO1	0.875862	61	134	95	0.210345	0.966997	73	125	105	0.240924			Other
chr1	ENSG00000125462	C1orf61	1.21811	80	70	93	0.329218	1.26	89	81	80	0.356			Other
chr1	ENSG00000125703	ATG4C	0.327731	17	257	83	0.047619	0.370482	17	230	85	0.0512048			Other
chr1	ENSG00000125944	HNRNPR	0.661597	31	140	92	0.117871	0.796154	51	119	90	0.196154			Other
chr1	ENSG00000125945	ZNF436	0.826087	27	66	45	0.195652	0.84	30	68	52	0.2			Other
chr1	ENSG00000126067	PSMB2	0.645161	32	114	71	0.147465	0.649485	30	107	57	0.154639			Other
chr1	ENSG00000126070	AGO3	1.75172	81	1	63	0.558621	1.55372	53	1	67	0.438017			Other
chr1	ENSG00000126088	UROD	1.77316	267	21	241	0.504726	1.70787	277	17	240	0.518727			Other
chr1	ENSG00000126091	ST3GAL3	0.703846	40	130	90	0.153846	0.620301	35	144	87	0.131579			Other
chr1	ENSG00000126106	TMEM53	1.7125	179	9	212	0.4475	1.70752	165	10	184	0.45961			Other
chr1	ENSG00000126107	HECTD3	1.87117	263	1	225	0.537832	1.73477	269	9	231	0.528487			Other
chr1	ENSG00000126698	DNAJC8	1.80942	251	50	145	0.56278	1.74127	266	68	153	0.546201			Other
chr1	ENSG00000126705	AHDC1	1.08333	43	44	33	0.358333	1.27273	47	43	42	0.356061			Other
chr1	ENSG00000126709	IFI6	1.11005	57	68	84	0.272727	1.29289	85	71	83	0.355649			Other
chr1	ENSG00000127054	INTS11	2.33636	81	0	29	0.736364	2.2037	72	0	36	0.666667			Other
chr1	ENSG00000127074	RGS13	0.266871	10	252	64	0.0306748	0.211726	6	250	51	0.019544			Other
chr1	ENSG00000127124	HIVEP3	0.398524	23	192	56	0.0848708	0.402098	14	191	81	0.048951			Other
chr1	ENSG00000127125	PPCS	1.60338	109	0	128	0.459916	1.49597	96	0	152	0.387097			Other
chr1	ENSG00000127129	EDN2	0.368421	18	180	49	0.0728745	0.332031	16	192	48	0.0625			Other
chr1	ENSG00000127423	AUNIP	0.865204	68	145	106	0.213166	0.946128	72	126	99	0.242424			Other
chr1	ENSG00000127463	EMC1	1.49862	141	0	222	0.38843	1.49706	131	0	209	0.385294			Other
chr1	ENSG00000127472	PLA2G5	0.308682	18	242	51	0.0578778	0.24269	17	279	46	0.0497076			Other
chr1	ENSG00000127481	UBR4	0.604878	47	221	142	0.114634	0.657825	55	193	129	0.145889			Other
chr1	ENSG00000127483	HP1BP3	0.51875	13	97	50	0.08125	0.338028	9	105	28	0.0633803			Other
chr1	ENSG00000127603	MACF1	0.536313	29	200	129	0.0810056	0.618182	56	225	104	0.145455			Other
chr1	ENSG00000130695	CEP85	0.834343	99	221	175	0.2	0.869074	101	196	146	0.227991			Other
chr1	ENSG00000130762	ARHGEF16	0.238806	7	162	32	0.0348259	0.2657	10	165	32	0.0483092			Other
chr1	ENSG00000130764	LRRC47	0.498534	33	209	99	0.0967742	0.542208	38	190	80	0.123377			Other
chr1	ENSG00000130766	SESN2	1.19643	184	170	206	0.328571	1.22619	167	152	185	0.331349			Other
chr1	ENSG00000130768	SMPDL3B	1.08812	80	96	85	0.306513	0.907173	54	104	79	0.227848			Other
chr1	ENSG00000130770	ATP5IF1	1.96078	251	21	136	0.615196	2.01205	274	19	122	0.660241			Other
chr1	ENSG00000130772	MED18	1.0559	126	162	195	0.26087	1.20469	162	138	169	0.345416			Other
chr1	ENSG00000130775	THEMIS2	1.11722	79	93	101	0.289377	1.17842	77	80	84	0.319502			Other
chr1	ENSG00000130939	UBE4B	0.720257	49	155	107	0.157556	0.740413	60	162	117	0.176991			Other
chr1	ENSG00000130940	CASZ1	0.300699	15	222	49	0.0524476	0.352941	26	225	55	0.0849673			Other
chr1	ENSG00000131233	GJA9	0.698514	73	235	163	0.154989	0.811456	82	193	144	0.195704			Other
chr1	ENSG00000131236	CAP1	0.852941	76	156	142	0.203209	0.642298	46	196	141	0.120104			Other
chr1	ENSG00000131238	PPT1	0.62039	61	250	150	0.132321	0.627119	70	279	182	0.131827			Other
chr1	ENSG00000131584	ACAP3	1.66667	38	6	25	0.550725	1.61728	40	9	32	0.493827			Other
chr1	ENSG00000131591	C1orf159	0.92	41	62	47	0.273333	0.821429	34	69	65	0.202381			Other
chr1	ENSG00000131686	CA6	0.44709	32	250	96	0.0846561	0.564103	58	257	114	0.135198			Other
chr1	ENSG00000131697	NPHP4	1.5974	37	4	36	0.480519	1.38182	20	5	30	0.363636			Other
chr1	ENSG00000131778	CHD1L	1.34586	75	5	186	0.281955	1.341	78	7	176	0.298851			Other
chr1	ENSG00000131779	PEX11B	1.08057	67	74	70	0.317536	1.27513	76	57	56	0.402116			Other
chr1	ENSG00000131781	FMO5	1.36047	74	1	183	0.286822	1.36364	77	0	176	0.304348			Other
chr1	ENSG00000131788	PIAS3	1.00639	88	113	112	0.28115	1.04207	88	116	105	0.28479			Other
chr1	ENSG00000131791	PRKAB2	0.502762	38	227	97	0.104972	0.459016	33	241	92	0.0901639			Other
chr1	ENSG00000131910	NR0B2	1.20675	78	73	86	0.329114	1.21101	66	66	86	0.302752			Other
chr1	ENSG00000131914	LIN28A	0.801858	66	154	103	0.204334	0.776371	48	120	69	0.202532			Other
chr1	ENSG00000132122	SPATA6	0.143939	3	116	13	0.0227273	0.136364	3	136	15	0.0194805			Other
chr1	ENSG00000132128	LRRC41	1.87952	85	0	81	0.512048	1.64789	69	0	73	0.485915			Other
chr1	ENSG00000132185	FCRLA	0.649682	34	169	111	0.10828	0.737952	61	163	108	0.183735			Other
chr1	ENSG00000132196	HSD17B7	0.320896	13	198	57	0.0485075	0.407273	19	184	72	0.0690909			Other
chr1	ENSG00000132485	ZRANB2	0.181818	3	183	34	0.0136364	0.190476	4	174	32	0.0190476			Other
chr1	ENSG00000132676	DAP3	0.884013	64	145	110	0.200627	0.873754	67	139	95	0.222591			Other
chr1	ENSG00000132677	RHBG	0.996689	80	121	101	0.264901	1.04869	81	111	75	0.303371			Other
chr1	ENSG00000132680	KHDC4	1.54599	153	72	112	0.454006	1.63533	171	64	116	0.487179			Other
chr1	ENSG00000132681	ATP1A4	0.494505	36	229	99	0.0989011	0.431078	26	264	109	0.0651629			Other
chr1	ENSG00000132688	NES	1.03968	69	94	89	0.27381	0.940711	56	99	98	0.221344			Other
chr1	ENSG00000132692	BCAN	1.00797	68	100	83	0.270916	0.842912	59	129	73	0.226054			Other
chr1	ENSG00000132693	CRP	0.208754	11	251	35	0.037037	0.155116	4	261	38	0.0132013			Other
chr1	ENSG00000132694	ARHGEF11	0.429224	24	156	39	0.109589	0.386266	15	164	54	0.0643777			Other
chr1	ENSG00000132698	RAB25	1.58367	114	59	72	0.465306	1.52155	100	54	78	0.431034			Other
chr1	ENSG00000132702	HAPLN2	1.16154	83	84	93	0.319231	1.08607	77	91	76	0.315574			Other
chr1	ENSG00000132703	APCS	0.148289	5	229	29	0.0190114	0.217712	12	228	31	0.0442804			Other
chr1	ENSG00000132704	FCRL2	0.274194	14	198	36	0.0564516	0.270992	13	210	39	0.0496183			Other
chr1	ENSG00000132716	DCAF8	0.79638	42	98	81	0.190045	0.856481	43	90	83	0.199074			Other
chr1	ENSG00000132718	SYT11	1.91837	187	3	153	0.54519	1.9528	191	7	141	0.563422			Other
chr1	ENSG00000132763	MMACHC	1.26937	103	86	82	0.380074	1.04333	85	112	103	0.283333			Other
chr1	ENSG00000132768	DPH2	1.25366	70	57	78	0.341463	1.15842	62	58	82	0.306931			Other
chr1	ENSG00000132773	TOE1	1.78169	152	15	117	0.535211	1.84906	151	9	105	0.569811			Other
chr1	ENSG00000132780	NASP	1.084	78	89	83	0.312	0.939394	51	93	87	0.220779			Other
chr1	ENSG00000132781	MUTYH	1.9345	137	0	92	0.598253	1.99095	139	0	82	0.628959			Other
chr1	ENSG00000132849	PATJ	0.38024	22	230	82	0.0658683	0.423423	23	219	91	0.0690691			Other
chr1	ENSG00000132854	KANK4	0.175719	7	265	41	0.0223642	0.115169	4	319	33	0.011236			Other
chr1	ENSG00000132855	ANGPTL3	0.336898	9	137	41	0.0481283	0.366834	12	141	46	0.0603015			Other
chr1	ENSG00000132879	FBXO44	0.852273	79	161	112	0.224432	0.997382	113	158	111	0.295812			Other
chr1	ENSG00000132881	CPLANE2	0.492701	19	173	82	0.0693431	0.557143	37	166	77	0.132143			Other
chr1	ENSG00000132906	CASP9	1.33913	73	8	149	0.317391	1.60837	120	7	136	0.456274			Other
chr1	ENSG00000133019	CHRM3	0.04	0	216	9	0	0.0420561	0	205	9	0			Other
chr1	ENSG00000133048	CHI3L1	0.353909	16	181	46	0.0658436	0.35023	13	156	48	0.0599078			Other
chr1	ENSG00000133055	MYBPH	0.30038	13	204	46	0.0494297	0.443137	22	180	53	0.0862745			Other
chr1	ENSG00000133056	PIK3C2B	0.67284	45	165	114	0.138889	0.714815	46	140	84	0.17037			Other
chr1	ENSG00000133059	DSTYK	0.442771	23	215	94	0.0692771	0.494318	34	222	96	0.0965909			Other
chr1	ENSG00000133063	CHIT1	0.731818	73	221	146	0.165909	0.770408	72	181	139	0.183673			Other
chr1	ENSG00000133065	SLC41A1	0.426523	23	189	67	0.0824373	0.454545	21	174	80	0.0763636			Other
chr1	ENSG00000133067	LGR6	0.448276	26	163	43	0.112069	0.356098	12	148	45	0.0585366			Other
chr1	ENSG00000133069	TMCC2	0.387324	9	100	33	0.0633803	0.47482	14	87	38	0.100719			Other
chr1	ENSG00000133216	EPHB2	0.267606	6	113	23	0.0422535	0.294118	7	105	24	0.0514706			Other
chr1	ENSG00000133226	SRRM1	0.507886	35	203	79	0.11041	0.533569	33	174	76	0.116608			Other
chr1	ENSG00000134183	GNAT2	1.05528	51	61	87	0.256281	1.14091	65	62	93	0.295455			Other
chr1	ENSG00000134184	GSTM1	0.714286	1	3	3	0.142857	0.714286	36	103	50	0.190476			Other
chr1	ENSG00000134186	PRPF38B	0.535256	34	187	91	0.108974	0.489362	28	200	101	0.0851064			Other
chr1	ENSG00000134193	REG4	0.156923	5	282	38	0.0153846	0.17608	7	257	37	0.0232558			Other
chr1	ENSG00000134198	TSPAN2	0.149123	9	300	33	0.0263158	0.216828	10	256	43	0.0323625			Other
chr1	ENSG00000134200	TSHB	0.132812	3	337	44	0.0078125	0.138686	6	360	45	0.0145985			Other
chr1	ENSG00000134201	GSTM5	0.52551	23	122	51	0.117347	0.442211	19	138	42	0.0954774			Other
chr1	ENSG00000134202	GSTM3	0.489164	36	206	81	0.111455	0.611842	47	177	80	0.154605			Other
chr1	ENSG00000134207	SYT6	0.253165	7	186	44	0.0295359	0.268	12	199	39	0.048			Other
chr1	ENSG00000134215	VAV3	0.189333	13	317	45	0.0346667	0.183844	8	303	48	0.0222841			Other
chr1	ENSG00000134216	CHIA	0.25641	10	215	48	0.03663	0.33	15	216	69	0.05			Other
chr1	ENSG00000134222	PSRC1	0.778878	58	147	98	0.191419	0.804054	51	134	111	0.172297			Other
chr1	ENSG00000134240	HMGCS2	0.136986	7	197	15	0.0319635	0.128713	2	178	22	0.00990099			Other
chr1	ENSG00000134242	PTPN22	0.835052	35	77	82	0.180412	0.817757	42	95	77	0.196262			Other
chr1	ENSG00000134243	SORT1	0.99308	72	110	107	0.249135	0.9	66	121	103	0.227586			Other
chr1	ENSG00000134245	WNT2B	0.49481	23	177	89	0.0795848	0.478689	28	197	80	0.0918033			Other
chr1	ENSG00000134247	PTGFRN	0.351485	8	144	50	0.039604	0.337255	15	188	52	0.0588235			Other
chr1	ENSG00000134248	LAMTOR5	0.400662	19	207	76	0.0629139	0.424615	26	217	82	0.08			Other
chr1	ENSG00000134249	ADAM30	0.158371	6	194	21	0.0271493	0.168627	3	216	36	0.0117647			Other
chr1	ENSG00000134250	NOTCH2	0.333333	1	15	5	0.047619	0.466667	1	10	4	0.0666667			Other
chr1	ENSG00000134253	TRIM45	0.297794	10	204	58	0.0367647	0.297189	6	184	59	0.0240964			Other
chr1	ENSG00000134255	CEPT1	1.18987	99	57	239	0.250633	1.09483	90	74	184	0.258621			Other
chr1	ENSG00000134256	CD101	0.303514	19	242	52	0.0607029	0.304878	17	248	63	0.0518293			Other
chr1	ENSG00000134258	VTCN1	0.13587	2	161	21	0.0108696	0.13198	1	172	24	0.00507614			Other
chr1	ENSG00000134259	NGF	0.131034	1	253	36	0.00344828	0.144404	5	243	29	0.0180505			Other
chr1	ENSG00000134262	AP4B1	1.57784	163	8	163	0.488024	1.62983	177	7	178	0.48895			Other
chr1	ENSG00000134365	CFHR4	0.102273	3	161	12	0.0170455	0.0955056	2	163	13	0.011236			Other
chr1	ENSG00000134369	NAV1	0.273973	11	225	56	0.0376712	0.242215	11	230	48	0.0380623			Other
chr1	ENSG00000134371	CDC73	0.580381	42	204	121	0.114441	0.59854	46	225	140	0.111922			Other
chr1	ENSG00000134375	TIMM17A	0.608414	40	171	98	0.12945	0.680982	44	167	115	0.134969			Other
chr1	ENSG00000134376	CRB1	0.16087	4	197	29	0.0173913	0.205645	4	205	39	0.016129			Other
chr1	ENSG00000134389	CFHR5	0.121547	4	164	13	0.0220994	0.139073	2	134	15	0.013245			Other
chr1	ENSG00000134644	PUM1	0.473868	24	183	80	0.0836237	0.458746	25	196	82	0.0825083			Other
chr1	ENSG00000134668	SPOCD1	0.702632	56	194	130	0.147368	0.751295	60	186	140	0.15544			Other
chr1	ENSG00000134684	YARS	1.26786	99	55	182	0.294643	1.30769	108	42	175	0.332308			Other
chr1	ENSG00000134686	PHC2	0.441077	24	202	71	0.0808081	0.349544	17	239	73	0.0516717			Other
chr1	ENSG00000134690	CDCA8	1.71552	117	0	115	0.50431	1.65044	103	0	123	0.455752			Other
chr1	ENSG00000134697	GNL2	0.852459	73	160	133	0.199454	0.837696	81	170	131	0.212042			Other
chr1	ENSG00000134698	AGO4	0.729258	42	120	67	0.183406	0.746606	33	106	82	0.149321			Other
chr1	ENSG00000134709	HOOK1	0.255725	10	208	44	0.0381679	0.235294	5	187	46	0.0210084			Other
chr1	ENSG00000134716	CYP2J2	0.114583	4	175	13	0.0208333	0.185185	3	158	28	0.015873			Other
chr1	ENSG00000134717	BTF3L4	1.60094	89	0	124	0.41784	1.69469	111	0	115	0.49115			Other
chr1	ENSG00000134744	TUT4	1.54502	86	8	117	0.407583	1.32524	60	12	134	0.291262			Other
chr1	ENSG00000134748	PRPF38A	1.63347	113	1	137	0.450199	1.5315	106	4	144	0.417323			Other
chr1	ENSG00000135744	AGT	0.205714	12	293	45	0.0342857	0.186667	8	322	45	0.0213333			Other
chr1	ENSG00000135747	ZNF670-ZNF695	1.33654	88	0	224	0.282051	1.30844	82	0	226	0.266234			Other
chr1	ENSG00000135749	PCNX2	0.220379	12	343	67	0.028436	0.185567	10	326	52	0.0257732			Other
chr1	ENSG00000135750	KCNK1	0.462617	19	140	55	0.088785	0.43913	11	143	76	0.0478261			Other
chr1	ENSG00000135763	URB2	1.29024	109	14	287	0.265854	1.30447	93	6	259	0.259777			Other
chr1	ENSG00000135766	EGLN1	0.413386	13	166	75	0.0511811	0.404878	12	134	59	0.0585366			Other
chr1	ENSG00000135773	CAPN9	0.204023	9	288	51	0.0258621	0.193642	7	286	53	0.0202312			Other
chr1	ENSG00000135775	COG2	0.243077	13	260	52	0.04	0.297297	13	225	58	0.0439189			Other
chr1	ENSG00000135776	ABCB10	0.585657	29	137	85	0.115538	0.457565	18	174	79	0.0664207			Other
chr1	ENSG00000135778	NTPCR	0.252907	8	268	68	0.0232558	0.28022	15	279	70	0.0412088			Other
chr1	ENSG00000135801	TAF5L	1.30941	110	9	285	0.272277	1.31728	93	3	257	0.263456			Other
chr1	ENSG00000135821	GLUL	0.328859	12	213	73	0.0402685	0.357934	17	193	61	0.0627306			Other
chr1	ENSG00000135823	STX6	0.666667	41	144	103	0.142361	0.682594	40	144	109	0.136519			Other
chr1	ENSG00000135824	RGS8	0.453704	15	136	65	0.0694444	0.461538	20	156	58	0.0854701			Other
chr1	ENSG00000135828	RNASEL	0.505112	43	293	153	0.0879346	0.558416	55	289	161	0.108911			Other
chr1	ENSG00000135829	DHX9	0.39172	23	217	74	0.0732484	0.497041	35	214	89	0.10355			Other
chr1	ENSG00000135835	KIAA1614	0.658793	48	193	140	0.125984	0.655696	50	201	144	0.126582			Other
chr1	ENSG00000135837	CEP350	1.30022	118	14	321	0.260486	1.29108	119	22	285	0.279343			Other
chr1	ENSG00000135838	NPL	0.639847	33	138	90	0.126437	0.648	33	129	88	0.132			Other
chr1	ENSG00000135842	FAM129A	0.339492	22	311	100	0.0508083	0.331887	22	337	102	0.0477223			Other
chr1	ENSG00000135845	PIGC	0.234807	10	288	64	0.0276243	0.215339	9	276	54	0.0265487			Other
chr1	ENSG00000135862	LAMC1	0.288961	16	236	56	0.0519481	0.415094	19	177	69	0.0716981			Other
chr1	ENSG00000135870	RC3H1	1.30851	87	21	174	0.308511	1.21071	79	27	174	0.282143			Other
chr1	ENSG00000136628	EPRS	0.396313	12	148	57	0.0552995	0.419847	20	181	61	0.0763359			Other
chr1	ENSG00000136630	HLX	0.185567	5	321	62	0.0128866	0.186788	12	369	58	0.0273349			Other
chr1	ENSG00000136631	VPS45	0.732143	41	131	108	0.146429	0.864865	57	114	88	0.220077			Other
chr1	ENSG00000136634	IL10	0.614094	36	164	98	0.120805	0.551622	38	196	105	0.112094			Other
chr1	ENSG00000136636	KCTD3	0.21147	3	224	52	0.0107527	0.213389	6	194	39	0.0251046			Other
chr1	ENSG00000136643	RPS6KC1	0.513043	29	201	115	0.084058	0.541076	42	211	100	0.11898			Other
chr1	ENSG00000137936	BCAR3	0.277108	5	65	13	0.060241	0.320988	5	62	14	0.0617284			Other
chr1	ENSG00000137941	TTLL7	0.208	5	203	42	0.02	0.191057	5	206	35	0.0203252			Other
chr1	ENSG00000137942	FNBP1L	0.212291	6	149	24	0.0335196	0.265625	9	150	33	0.046875			Other
chr1	ENSG00000137944	KYAT3	1.26384	64	0	243	0.208469	1.21277	62	0	267	0.18845			Other
chr1	ENSG00000137947	GTF2B	0.323988	12	231	78	0.0373832	0.359589	15	205	72	0.0513699			Other
chr1	ENSG00000137948	BRDT	0.159151	11	329	37	0.0291777	0.182768	9	322	52	0.0234987			Other
chr1	ENSG00000137955	RABGGTB	0.4975	39	246	115	0.0975	0.447802	25	229	110	0.0686813			Other
chr1	ENSG00000137959	IFI44L	0.313305	10	171	52	0.0429185	0.290598	15	181	38	0.0641026			Other
chr1	ENSG00000137960	GIPC2	1.37079	80	5	182	0.299625	1.38846	95	8	157	0.365385			Other
chr1	ENSG00000137962	ARHGAP29	0.105572	3	311	27	0.00879765	0.140625	4	282	34	0.0125			Other
chr1	ENSG00000137965	IFI44	0.315589	10	192	61	0.0380228	0.32	12	185	53	0.048			Other
chr1	ENSG00000137968	SLC44A5	0.148305	5	206	25	0.0211864	0.0963303	1	198	19	0.00458716			Other
chr1	ENSG00000137975	CLCA2	0.149351	5	271	32	0.0162338	0.164948	7	251	33	0.024055			Other
chr1	ENSG00000137976	DNASE2B	0.223214	7	181	36	0.03125	0.25	9	162	33	0.0441176			Other
chr1	ENSG00000137992	DBT	0.546218	22	132	84	0.092437	0.553991	22	125	66	0.103286			Other
chr1	ENSG00000137996	RTCA	1.51613	73	0	113	0.392473	1.48503	63	0	104	0.377246			Other
chr1	ENSG00000142224	IL19	0.639535	40	184	120	0.116279	0.65	44	176	120	0.129412			Other
chr1	ENSG00000142583	SLC2A5	0.954839	78	118	114	0.251613	0.801471	52	123	97	0.191176			Other
chr1	ENSG00000142599	RERE	0.535714	37	210	89	0.110119	0.5	29	212	109	0.0828571			Other
chr1	ENSG00000142606	MMEL1	0.331169	8	112	34	0.0519481	0.373333	12	108	30	0.08			Other
chr1	ENSG00000142609	CFAP74	0.287823	14	212	45	0.0516605	0.294545	15	213	47	0.0545455			Other
chr1	ENSG00000142611	PRDM16	0.188811	4	123	16	0.027972	0.150376	3	117	13	0.0225564			Other
chr1	ENSG00000142615	CELA2A	0.430712	20	177	70	0.0749064	0.34632	14	169	48	0.0606061			Other
chr1	ENSG00000142619	PADI3	0.255952	7	136	25	0.0416667	0.251497	3	131	33	0.0179641			Other
chr1	ENSG00000142621	FHAD1	0.423948	22	203	84	0.0711974	0.396875	20	220	80	0.0625			Other
chr1	ENSG00000142623	PADI1	0.236364	7	177	36	0.0318182	0.301587	12	189	51	0.047619			Other
chr1	ENSG00000142627	EPHA2	0.452514	14	115	50	0.0782123	0.473404	16	120	52	0.0851064			Other
chr1	ENSG00000142632	ARHGEF19	0.581749	34	153	76	0.129278	0.529851	34	168	66	0.126866			Other
chr1	ENSG00000142634	EFHD2	1.25369	81	12	246	0.238938	1.3121	88	10	216	0.280255			Other
chr1	ENSG00000142655	PEX14	1.48658	112	7	179	0.375839	1.49831	117	10	168	0.39661			Other
chr1	ENSG00000142657	PGD	1.31696	173	82	193	0.386161	1.25463	161	103	168	0.372685			Other
chr1	ENSG00000142661	MYOM3	0.462406	28	175	63	0.105263	0.357401	14	200	63	0.0505415			Other
chr1	ENSG00000142669	SH3BGRL3	0.988506	90	132	126	0.258621	1.06129	89	103	118	0.287097			Other
chr1	ENSG00000142675	CNKSR1	1.20172	71	50	112	0.304721	1.27706	78	47	106	0.337662			Other
chr1	ENSG00000142676	RPL11	1.02991	61	86	87	0.260684	0.995536	63	94	67	0.28125			Other
chr1	ENSG00000142677	IL22RA1	0.362126	21	225	55	0.0697674	0.424242	21	204	72	0.0707071			Other
chr1	ENSG00000142684	ZNF593	1.73154	228	0	219	0.510067	1.65293	222	0	239	0.481562			Other
chr1	ENSG00000142686	C1orf216	0.778846	36	94	78	0.173077	0.826484	47	99	73	0.214612			Other
chr1	ENSG00000142687	KIAA0319L	1.58716	55	6	48	0.504587	1.63063	49	7	55	0.441441			Other
chr1	ENSG00000142694	EVA1B	0.793388	47	117	78	0.194215	0.742857	41	123	81	0.167347			Other
chr1	ENSG00000142698	C1orf94	0.0961538	2	190	16	0.00961538	0.168675	5	212	32	0.0200803			Other
chr1	ENSG00000142700	DMRTA2	0.158416	3	89	9	0.029703	0.234568	3	68	10	0.037037			Other
chr1	ENSG00000142733	MAP3K6	0.798319	44	114	80	0.184874	0.7751	50	128	71	0.200803			Other
chr1	ENSG00000142748	FCN3	0.820069	58	139	92	0.200692	0.893082	71	143	104	0.22327			Other
chr1	ENSG00000142751	GPN2	1.20652	56	46	82	0.304348	1.13187	57	63	62	0.313187			Other
chr1	ENSG00000142765	SYTL1	0.967742	48	66	72	0.258065	0.934673	43	75	81	0.21608			Other
chr1	ENSG00000142784	WDTC1	0.716364	43	139	93	0.156364	0.762963	46	130	94	0.17037			Other
chr1	ENSG00000142789	CELA3A	0.678571	19	65	28	0.169643	0.460784	7	64	31	0.0686275			Other
chr1	ENSG00000142794	NBPF3	0.432886	23	200	75	0.0771812	0.281967	14	238	53	0.0459016			Other
chr1	ENSG00000142798	HSPG2	0.568182	24	109	43	0.136364	0.562842	16	101	66	0.0874317			Other
chr1	ENSG00000142856	ITGB3BP	1.288	65	0	185	0.26	1.2695	64	0	218	0.22695			Other
chr1	ENSG00000142864	SERBP1	0.335404	10	125	26	0.0621118	0.317365	5	121	41	0.0299401			Other
chr1	ENSG00000142867	BCL10	0.513736	36	214	114	0.0989011	0.524297	38	232	121	0.0971867			Other
chr1	ENSG00000142871	CYR61	0.159292	2	192	32	0.00884956	0.157025	1	205	36	0.00413223			Other
chr1	ENSG00000142875	PRKACB	1.14545	29	0	191	0.131818	1.21244	33	0	160	0.170984			Other
chr1	ENSG00000142892	PIGK	0.207612	5	238	46	0.017301	0.202749	8	241	42	0.0274914			Other
chr1	ENSG00000142910	TINAGL1	0.540856	23	151	83	0.0894942	0.476395	14	139	80	0.0600858			Other
chr1	ENSG00000142920	AZIN2	0.491429	33	220	97	0.0942857	0.493369	35	237	105	0.0928382			Other
chr1	ENSG00000142937	RPS8	1.29621	171	129	149	0.380846	1.18664	137	128	169	0.315668			Other
chr1	ENSG00000142945	KIF2C	1.45052	163	89	132	0.424479	1.33427	144	86	126	0.404494			Other
chr1	ENSG00000142949	PTPRF	0.613445	28	131	79	0.117647	0.70098	35	101	68	0.171569			Other
chr1	ENSG00000142959	BEST4	1.53525	170	79	134	0.443864	1.38275	153	92	126	0.412399			Other
chr1	ENSG00000142961	MOB3C	1.62745	97	0	107	0.47549	1.57143	76	0	113	0.402116			Other
chr1	ENSG00000142973	CYP4B1	0.327731	6	87	26	0.0504202	0.355372	10	88	23	0.0826446			Other
chr1	ENSG00000143001	TMEM61	0.350785	11	137	43	0.0575916	0.28	8	174	43	0.0355556			Other
chr1	ENSG00000143006	DMRTB1	0.375	15	148	45	0.0721154	0.447236	17	133	49	0.0854271			Other
chr1	ENSG00000143013	LMO4	0.252427	4	159	43	0.0194175	0.24186	5	168	42	0.0232558			Other
chr1	ENSG00000143028	SYPL2	0.811024	53	123	78	0.208661	0.851406	50	106	93	0.200803			Other
chr1	ENSG00000143032	BARHL2	0.195402	7	149	18	0.0402299	0.115789	2	170	18	0.0105263			Other
chr1	ENSG00000143033	MTF2	0.654971	27	93	51	0.157895	0.568862	18	94	55	0.107784			Other
chr1	ENSG00000143036	SLC44A3	0.126437	3	231	27	0.0114943	0.125	4	263	29	0.0135135			Other
chr1	ENSG00000143061	IGSF3	0.346939	13	173	59	0.0530612	0.301205	13	190	46	0.0522088			Other
chr1	ENSG00000143067	ZNF697	1.13014	29	15	102	0.19863	1.10366	20	10	134	0.121951			Other
chr1	ENSG00000143079	CTTNBP2NL	0.557927	39	191	98	0.118902	0.631016	48	206	120	0.128342			Other
chr1	ENSG00000143093	STRIP1	0.643875	40	176	135	0.11396	0.712676	56	181	118	0.157746			Other
chr1	ENSG00000143105	KCNA10	0.288177	16	307	83	0.0394089	0.294118	17	285	72	0.0454545			Other
chr1	ENSG00000143106	PSMA5	0.806763	36	87	84	0.173913	0.976654	67	98	92	0.2607			Other
chr1	ENSG00000143107	FNDC7	0.543175	43	220	96	0.119777	0.56	41	190	94	0.126154			Other
chr1	ENSG00000143110	C1orf162	0.574286	41	197	112	0.117143	0.598684	37	167	100	0.121711			Other
chr1	ENSG00000143119	CD53	0.506631	37	227	113	0.0981432	0.486034	27	216	115	0.075419			Other
chr1	ENSG00000143125	PROK1	0.356037	19	229	75	0.0588235	0.317549	22	276	61	0.0612813			Other
chr1	ENSG00000143126	CELSR2	0.741279	67	178	99	0.194767	0.778098	70	163	114	0.201729			Other
chr1	ENSG00000143127	ITGA10	1.14525	57	62	60	0.318436	1.32597	66	47	68	0.364641			Other
chr1	ENSG00000143147	GPR161	0.301471	9	201	62	0.0330882	0.333333	14	193	57	0.0530303			Other
chr1	ENSG00000143149	ALDH9A1	0.489919	47	317	132	0.0947581	0.425403	34	324	138	0.0685484			Other
chr1	ENSG00000143153	ATP1B1	0.192182	6	254	47	0.019544	0.163636	5	237	33	0.0181818			Other
chr1	ENSG00000143155	TIPRL	0.412791	22	229	93	0.0639535	0.396947	24	266	103	0.0610687			Other
chr1	ENSG00000143156	NME7	0.256831	11	283	72	0.0300546	0.241627	15	338	65	0.0358852			Other
chr1	ENSG00000143157	POGK	0.494253	18	113	43	0.103448	0.515625	14	81	33	0.109375			Other
chr1	ENSG00000143158	MPC2	1.23256	71	18	212	0.23588	1.20588	71	19	216	0.232026			Other
chr1	ENSG00000143162	CREG1	0.486486	23	185	88	0.0777027	0.494662	25	173	83	0.088968			Other
chr1	ENSG00000143164	DCAF6	1.08767	77	62	226	0.210959	1.10227	73	46	233	0.207386			Other
chr1	ENSG00000143167	GPA33	0.282895	12	233	59	0.0394737	0.210938	8	211	37	0.03125			Other
chr1	ENSG00000143171	RXRG	0.218085	14	310	52	0.037234	0.180723	8	282	42	0.0240964			Other
chr1	ENSG00000143178	TBX19	0.290323	15	283	74	0.0403226	0.339332	18	277	94	0.0462725			Other
chr1	ENSG00000143179	UCK2	1.40129	99	13	197	0.320388	1.44986	127	6	216	0.363897			Other
chr1	ENSG00000143183	TMCO1	1.46528	98	0	190	0.340278	1.47892	125	0	207	0.376506			Other
chr1	ENSG00000143184	XCL1	0.271028	11	251	59	0.0342679	0.2	13	259	33	0.042623			Other
chr1	ENSG00000143185	XCL2	0.167763	5	260	39	0.0164474	0.214286	11	222	33	0.0413534			Other
chr1	ENSG00000143190	POU2F1	1.30769	45	9	89	0.314685	1.25	37	14	105	0.237179			Other
chr1	ENSG00000143194	MAEL	1.25134	36	0	151	0.192513	1.3	47	0	143	0.247368			Other
chr1	ENSG00000143195	ILDR2	1.25	36	0	152	0.191489	1.3	47	0	143	0.247368			Other
chr1	ENSG00000143196	DPT	0.135632	6	383	46	0.0137931	0.119403	6	420	43	0.0127932			Other
chr1	ENSG00000143198	MGST3	0.587097	36	174	100	0.116129	0.54007	25	164	98	0.087108			Other
chr1	ENSG00000143199	ADCY10	0.474178	18	137	58	0.084507	0.441441	21	148	53	0.0945946			Other
chr1	ENSG00000143207	COP1	0.312139	9	130	34	0.0520231	0.382653	9	132	55	0.0459184			Other
chr1	ENSG00000143217	NECTIN4	1.35152	133	90	107	0.40303	1.30462	125	84	116	0.384615			Other
chr1	ENSG00000143222	UFC1	1.45113	173	105	121	0.433584	1.47297	161	86	123	0.435135			Other
chr1	ENSG00000143224	PPOX	1.56748	155	78	93	0.47546	1.6185	171	66	109	0.49422			Other
chr1	ENSG00000143226	FCGR2A	0.628253	35	147	87	0.130112	0.622449	39	173	82	0.132653			Other
chr1	ENSG00000143228	NUF2	0.198083	7	261	45	0.0223642	0.217822	10	250	43	0.0330033			Other
chr1	ENSG00000143248	RGS5	0.360406	12	144	41	0.0609137	0.330189	11	156	45	0.0518868			Other
chr1	ENSG00000143252	SDHC	1.43301	173	76	169	0.413876	1.51566	172	68	175	0.414458			Other
chr1	ENSG00000143256	PFDN2	2.31076	173	0	78	0.689243	2.25556	185	0	85	0.685185			Other
chr1	ENSG00000143257	NR1I3	0.985915	107	161	158	0.251174	1.01149	115	175	145	0.264368			Other
chr1	ENSG00000143258	USP21	1.76797	156	43	107	0.509804	1.64158	133	58	88	0.476703			Other
chr1	ENSG00000143278	F13B	0.162055	5	218	30	0.0197628	0.185714	8	239	33	0.0285714			Other
chr1	ENSG00000143294	PRCC	1.28075	142	103	129	0.379679	1.19006	115	104	123	0.336257			Other
chr1	ENSG00000143297	FCRL5	0.363128	14	137	28	0.0782123	0.333333	12	133	29	0.0689655			Other
chr1	ENSG00000143303	RRNAD1	2.00278	220	11	129	0.611111	1.92233	250	11	151	0.606796			Other
chr1	ENSG00000143314	MRPL24	1.50195	115	54	88	0.447471	1.34025	100	53	88	0.414938			Other
chr1	ENSG00000143315	PIGM	0.595833	29	139	72	0.120833	0.488479	21	135	61	0.0967742			Other
chr1	ENSG00000143318	CASQ1	0.686335	51	165	106	0.158385	0.700935	53	168	100	0.165109			Other
chr1	ENSG00000143319	ISG20L2	2.10398	210	0	117	0.642202	2.01351	239	0	131	0.645946			Other
chr1	ENSG00000143320	CRABP2	0.934483	71	129	90	0.244828	0.966997	79	132	92	0.260726			Other
chr1	ENSG00000143321	HDGF	1.42718	133	82	94	0.430421	1.28247	119	88	101	0.386364			Other
chr1	ENSG00000143322	ABL2	0.576803	40	184	95	0.125392	0.60625	40	175	105	0.125			Other
chr1	ENSG00000143324	XPR1	0.273171	7	156	42	0.0341463	0.336493	13	156	42	0.0616114			Other
chr1	ENSG00000143333	RGS16	0.600639	40	171	102	0.127796	0.670807	48	164	110	0.149068			Other
chr1	ENSG00000143337	TOR1AIP1	1.35024	124	0	290	0.299517	1.3913	111	0	257	0.30163			Other
chr1	ENSG00000143340	FAM163A	0.183623	7	336	60	0.0173697	0.176944	13	323	37	0.0348525			Other
chr1	ENSG00000143341	HMCN1	0.162651	5	144	17	0.0301205	0.137725	2	146	19	0.011976			Other
chr1	ENSG00000143344	RGL1	1.54639	79	0	115	0.407216	1.55376	70	1	115	0.376344			Other
chr1	ENSG00000143353	LYPLAL1	0.353846	13	145	37	0.0666667	0.262376	9	163	30	0.0445545			Other
chr1	ENSG00000143355	LHX9	0.256506	5	205	59	0.0185874	0.295203	7	199	65	0.0258303			Other
chr1	ENSG00000143363	PRUNE1	1.01543	93	119	112	0.287037	1.22333	106	97	97	0.353333			Other
chr1	ENSG00000143365	RORC	0.610526	38	158	89	0.133333	0.578571	38	170	72	0.135714			Other
chr1	ENSG00000143367	TUFT1	0.852941	51	111	76	0.214286	0.812977	49	118	95	0.187023			Other
chr1	ENSG00000143368	SF3B4	0.895604	81	142	141	0.222527	0.766017	59	158	142	0.164345			Other
chr1	ENSG00000143369	ECM1	1.08359	95	101	127	0.294118	1.14236	84	83	121	0.291667			Other
chr1	ENSG00000143373	ZNF687	1.21387	56	52	65	0.323699	1.23111	85	76	64	0.377778			Other
chr1	ENSG00000143374	TARS2	0.91048	99	177	182	0.216157	0.89823	96	185	171	0.212389			Other
chr1	ENSG00000143375	CGN	0.706052	55	184	108	0.158501	0.787172	60	162	121	0.174927			Other
chr1	ENSG00000143376	SNX27	0.675841	51	182	94	0.155963	0.694969	52	171	95	0.163522			Other
chr1	ENSG00000143379	SETDB1	0.875	89	168	127	0.231771	0.937799	100	172	146	0.239234			Other
chr1	ENSG00000143382	ADAMTSL4	1	113	158	152	0.267139	0.937355	96	164	171	0.222738			Other
chr1	ENSG00000143384	MCL1	1.025	68	83	89	0.283333	1.02985	69	90	109	0.257463			Other
chr1	ENSG00000143387	CTSK	0.611253	53	224	114	0.13555	0.734694	69	204	119	0.17602			Other
chr1	ENSG00000143390	RFX5	1.08127	77	92	114	0.272085	1.25483	88	75	96	0.339768			Other
chr1	ENSG00000143393	PI4KB	2.03125	131	0	93	0.584821	1.95135	102	0	83	0.551351			Other
chr1	ENSG00000143398	PIP5K1A	1.99652	178	11	98	0.620209	2.07317	187	27	73	0.651568			Other
chr1	ENSG00000143401	ANP32E	0.924282	85	147	151	0.221932	0.949875	88	144	167	0.220551			Other
chr1	ENSG00000143409	MINDY1	1.01543	93	119	112	0.287037	1.22333	106	97	97	0.353333			Other
chr1	ENSG00000143412	ANXA9	1.11029	78	100	94	0.286765	0.971014	63	105	108	0.228261			Other
chr1	ENSG00000143416	SELENBP1	1.07658	60	76	86	0.27027	0.979757	61	94	92	0.246964			Other
chr1	ENSG00000143418	CERS2	0.981481	93	151	134	0.246032	0.955696	76	128	112	0.240506			Other
chr1	ENSG00000143420	ENSA	0.903587	104	191	151	0.233184	0.83848	86	187	148	0.204276			Other
chr1	ENSG00000143434	SEMA6C	1.13652	87	97	109	0.296928	1.27778	109	91	106	0.356209			Other
chr1	ENSG00000143436	MRPL9	1.58755	106	8	143	0.412451	1.55556	110	13	138	0.421456			Other
chr1	ENSG00000143437	ARNT	0.821121	101	215	148	0.217672	0.83592	89	213	149	0.197339			Other
chr1	ENSG00000143442	POGZ	0.874652	76	158	125	0.211699	0.709898	44	149	100	0.150171			Other
chr1	ENSG00000143443	C1orf56	1.19549	130	126	143	0.325815	1.24297	134	113	144	0.342711			Other
chr1	ENSG00000143450	OAZ3	1.61265	107	6	140	0.422925	1.5748	109	10	135	0.429134			Other
chr1	ENSG00000143452	HORMAD1	0.750594	76	211	134	0.180523	0.686684	58	208	117	0.151436			Other
chr1	ENSG00000143457	GOLPH3L	0.799401	62	154	118	0.185629	0.750742	56	167	114	0.166172			Other
chr1	ENSG00000143458	GABPB2	2.03623	260	5	149	0.628019	2.14066	264	6	121	0.675192			Other
chr1	ENSG00000143469	SYT14	0.140909	4	194	22	0.0181818	0.161765	4	233	35	0.0147059			Other
chr1	ENSG00000143473	KCNH1	0.173594	10	349	50	0.0244499	0.19898	11	326	55	0.0280612			Other
chr1	ENSG00000143476	DTL	1.49834	107	0	194	0.355482	1.48425	99	0	155	0.389764			Other
chr1	ENSG00000143479	DYRK3	0.902564	40	80	75	0.205128	0.843318	43	92	82	0.198157			Other
chr1	ENSG00000143486	EIF2D	0.88764	55	115	97	0.205993	0.735192	50	143	94	0.174216			Other
chr1	ENSG00000143493	INTS7	1.49834	107	0	194	0.355482	1.48425	99	0	155	0.389764			Other
chr1	ENSG00000143494	VASH2	0.567797	37	203	114	0.10452	0.510363	39	230	117	0.101036			Other
chr1	ENSG00000143498	TAF1A	0.446154	20	167	73	0.0769231	0.484277	24	196	98	0.0754717			Other
chr1	ENSG00000143499	SMYD2	0.389381	13	156	57	0.0575221	0.289593	10	167	44	0.0452489			Other
chr1	ENSG00000143502	SUSD4	0.207101	4	138	27	0.0236686	0.196809	5	156	27	0.0265957			Other
chr1	ENSG00000143507	DUSP10	0.329238	15	290	102	0.036855	0.34322	21	333	118	0.0444915			Other
chr1	ENSG00000143512	HHIPL2	0.298305	14	224	57	0.0474576	0.345277	16	219	72	0.0521173			Other
chr1	ENSG00000143514	TP53BP2	0.384279	10	154	65	0.0436681	0.356557	10	167	67	0.0409836			Other
chr1	ENSG00000143515	ATP8B2	1.02308	71	83	106	0.273077	1.22407	81	67	93	0.3361			Other
chr1	ENSG00000143520	FLG2	0.149378	5	213	23	0.0207469	0.164179	6	230	32	0.0223881			Other
chr1	ENSG00000143536	CRNN	0.187702	8	268	33	0.02589	0.2	10	240	35	0.0350877			Other
chr1	ENSG00000143537	ADAM15	1.19805	106	93	109	0.344156	1.14375	102	113	105	0.31875			Other
chr1	ENSG00000143543	JTB	2.53392	350	0	107	0.765864	2.40881	382	0	95	0.800839			Other
chr1	ENSG00000143545	RAB13	2.39706	289	9	110	0.708333	2.14714	252	11	104	0.686649			Other
chr1	ENSG00000143546	S100A8	0.311355	14	208	51	0.0512821	0.293173	15	193	41	0.060241			Other
chr1	ENSG00000143549	TPM3	1.01302	101	149	134	0.263021	1.06145	104	132	122	0.290503			Other
chr1	ENSG00000143552	NUP210L	0.823864	75	173	104	0.213068	0.853723	76	172	128	0.202128			Other
chr1	ENSG00000143553	SNAPIN	1.2973	90	76	93	0.34749	1.24324	97	84	78	0.374517			Other
chr1	ENSG00000143554	SLC27A3	1.38667	87	55	83	0.386667	1.2449	91	70	84	0.371429			Other
chr1	ENSG00000143556	S100A7	0.381503	14	129	30	0.0809249	0.415301	17	133	33	0.0928962			Other
chr1	ENSG00000143569	UBAP2L	1.7958	174	14	145	0.522523	1.81429	194	13	143	0.554286			Other
chr1	ENSG00000143570	SLC39A1	2.31121	325	5	107	0.743707	2.30952	322	2	96	0.766667			Other
chr1	ENSG00000143575	HAX1	0.936464	81	149	132	0.223757	1.0359	107	143	140	0.274359			Other
chr1	ENSG00000143578	CREB3L4	2.32864	319	4	103	0.748826	2.30676	317	4	93	0.7657			Other
chr1	ENSG00000143590	EFNA3	1.30423	135	95	125	0.380282	1.18478	115	113	140	0.3125			Other
chr1	ENSG00000143595	AQP10	1.0902	75	76	104	0.294118	1.22619	81	64	107	0.321429			Other
chr1	ENSG00000143603	KCNN3	1.00787	97	155	129	0.254593	1	106	161	133	0.265			Other
chr1	ENSG00000143612	C1orf43	1.91216	167	0	129	0.564189	1.90373	190	0	132	0.590062			Other
chr1	ENSG00000143614	GATAD2B	1.38272	160	112	133	0.395062	1.27926	137	100	139	0.364362			Other
chr1	ENSG00000143621	ILF2	1.2418	81	82	81	0.331967	1.36694	101	63	84	0.407258			Other
chr1	ENSG00000143622	RIT1	1.15985	83	87	99	0.30855	1.22814	86	81	96	0.326996			Other
chr1	ENSG00000143624	INTS3	1.26797	114	98	94	0.372549	1.05556	81	106	101	0.28125			Other
chr1	ENSG00000143627	PKLR	1.39865	178	118	148	0.400901	1.38443	171	111	142	0.403302			Other
chr1	ENSG00000143630	HCN3	1.82967	193	50	121	0.53022	1.7561	206	57	106	0.558266			Other
chr1	ENSG00000143631	FLG	0.140625	6	118	4	0.046875	0.209091	4	91	15	0.0363636			Other
chr1	ENSG00000143632	ACTA1	0.308	16	192	42	0.064	0.291339	10	194	50	0.0393701			Other
chr1	ENSG00000143633	C1orf131	1.31383	99	0	277	0.263298	1.28784	93	0	310	0.230769			Other
chr1	ENSG00000143641	GALNT2	0.36	11	162	52	0.0488889	0.315353	9	176	56	0.0373444			Other
chr1	ENSG00000143643	TTC13	1.25624	96	0	345	0.217687	1.23545	79	0	299	0.208995			Other
chr1	ENSG00000143653	SCCPDH	0.448819	23	167	64	0.0905512	0.377119	14	166	56	0.059322			Other
chr1	ENSG00000143669	LYST	0.582583	36	185	112	0.108108	0.566372	36	194	109	0.106195			Other
chr1	ENSG00000143674	MAP3K21	0.22549	9	328	71	0.0220588	0.229469	12	334	68	0.0289855			Other
chr1	ENSG00000143702	CEP170	1.16935	41	13	194	0.165323	1.16961	54	17	212	0.190813			Other
chr1	ENSG00000143740	SNAP47	0.430303	13	107	45	0.0787879	0.507463	12	82	40	0.0895522			Other
chr1	ENSG00000143742	SRP9	0.554795	41	251	146	0.0936073	0.562212	47	245	142	0.108295			Other
chr1	ENSG00000143748	NVL	0.614887	37	163	109	0.119741	0.621528	33	151	104	0.114583			Other
chr1	ENSG00000143751	SDE2	0.752137	39	106	89	0.166667	0.63786	30	127	86	0.123457			Other
chr1	ENSG00000143753	DEGS1	0.681319	52	178	134	0.142857	0.695906	55	170	117	0.160819			Other
chr1	ENSG00000143756	FBXO28	0.557864	37	194	106	0.109792	0.523438	38	230	116	0.0989583			Other
chr1	ENSG00000143761	ARF1	0.598901	24	100	58	0.131868	0.724868	31	91	67	0.164021			Other
chr1	ENSG00000143768	LEFTY2	0.736	23	59	43	0.184	0.626761	17	77	48	0.119718			Other
chr1	ENSG00000143771	CNIH4	0.563584	35	195	116	0.101156	0.549451	34	205	125	0.0934066			Other
chr1	ENSG00000143772	ITPKB	0.634146	43	173	112	0.131098	0.57764	42	182	98	0.130435			Other
chr1	ENSG00000143774	GUK1	0.655738	33	123	88	0.135246	0.627907	36	138	84	0.139535			Other
chr1	ENSG00000143776	CDC42BPA	0.211765	4	139	27	0.0235294	0.204878	6	172	27	0.0292683			Other
chr1	ENSG00000143786	CNIH3	1.07326	69	70	134	0.252747	1.07368	68	63	154	0.238596			Other
chr1	ENSG00000143793	C1orf35	1.17453	62	48	102	0.292453	1.32673	72	39	91	0.356436			Other
chr1	ENSG00000143799	PARP1	0.663594	32	119	66	0.147465	0.545082	26	143	75	0.106557			Other
chr1	ENSG00000143801	PSEN2	0.596306	51	216	112	0.134565	0.67688	53	185	121	0.147632			Other
chr1	ENSG00000143811	PYCR2	1.57708	109	0	144	0.43083	1.40323	86	1	161	0.346774			Other
chr1	ENSG00000143815	LBR	0.48374	22	158	66	0.0894309	0.502024	31	158	58	0.125506			Other
chr1	ENSG00000143816	WNT9A	0.258621	5	135	34	0.0287356	0.28022	7	141	34	0.0384615			Other
chr1	ENSG00000143819	EPHX1	0.579065	51	252	146	0.113586	0.566586	49	241	123	0.118644			Other
chr1	ENSG00000143839	REN	0.263941	8	208	53	0.0297398	0.324042	13	209	65	0.0452962			Other
chr1	ENSG00000143842	SOX13	0.237197	15	303	53	0.0404313	0.259358	15	296	63	0.040107			Other
chr1	ENSG00000143845	ETNK2	0.257353	9	214	49	0.0330882	0.344203	16	200	60	0.057971			Other
chr1	ENSG00000143847	PPFIA4	0.498316	30	184	83	0.10101	0.516892	30	179	87	0.101351			Other
chr1	ENSG00000143850	PLEKHA6	0.397436	21	218	73	0.0673077	0.331058	15	214	64	0.0511945			Other
chr1	ENSG00000143851	PTPN7	0.685714	37	126	82	0.15102	0.638095	27	109	74	0.128571			Other
chr1	ENSG00000143858	SYT2	0.328	13	183	54	0.052	0.364286	17	202	61	0.0607143			Other
chr1	ENSG00000143862	ARL8A	0.712468	61	189	143	0.155216	0.717143	55	167	128	0.157143			Other
chr1	ENSG00000146463	ZMYM4	0.691099	28	96	67	0.146597	0.769663	32	96	50	0.179775			Other
chr1	ENSG00000149527	PLCH2	0.522167	22	122	59	0.108374	0.587065	27	117	57	0.134328			Other
chr1	ENSG00000150337	FCGR1A	0.625	1	8	7	0.0625	0.363636	0	7	4	0			Other
chr1	ENSG00000150681	RGS18	0.087963	2	199	15	0.00925926	0.0871212	4	246	14	0.0151515			Other
chr1	ENSG00000151414	NEK7	0.254777	9	243	62	0.0286624	0.258721	8	265	71	0.0232558			Other
chr1	ENSG00000151418	ATP6V1G3	0.310241	8	237	87	0.0240964	0.271242	8	233	65	0.0261438			Other
chr1	ENSG00000152061	RABGAP1L	1.21409	86	21	262	0.233062	1.23955	76	16	267	0.211699			Other
chr1	ENSG00000152078	TMEM56	0.139706	3	238	31	0.0110294	0.206422	5	178	35	0.0229358			Other
chr1	ENSG00000152092	ASTN1	0.0728745	3	232	12	0.0121457	0.0887097	2	228	18	0.00806452			Other
chr1	ENSG00000152104	PTPN14	0.197368	7	251	46	0.0230263	0.15942	4	236	36	0.0144928			Other
chr1	ENSG00000152332	UHMK1	0.365462	14	174	61	0.0562249	0.443137	16	167	72	0.0627451			Other
chr1	ENSG00000152382	TADA1	0.51751	23	155	79	0.0894942	0.491228	21	170	94	0.0736842			Other
chr1	ENSG00000152760	TCTEX1D1	0.123077	4	234	22	0.0153846	0.144928	6	242	28	0.0217391			Other
chr1	ENSG00000152763	WDR78	1.18836	59	11	222	0.202055	1.17966	62	24	209	0.210169			Other
chr1	ENSG00000152904	GGPS1	1.41176	134	37	169	0.394118	1.26899	102	52	162	0.322785			Other
chr1	ENSG00000153029	MR1	0.669753	42	162	120	0.12963	0.724242	59	161	110	0.178788			Other
chr1	ENSG00000153187	HNRNPU	1.392	128	17	230	0.341333	1.48549	156	11	212	0.411609			Other
chr1	ENSG00000153207	AHCTF1	0.436416	26	228	92	0.0751445	0.42735	24	230	97	0.0683761			Other
chr1	ENSG00000153230	OR14K1	0.105727	5	209	13	0.0220264	0.138889	5	192	19	0.0231481			Other
chr1	ENSG00000153363	LINC00467	0.507772	18	118	57	0.0932642	0.454936	15	145	73	0.0643777			Other
chr1	ENSG00000153898	MCOLN2	0.951338	65	94	252	0.158151	1.02785	78	84	233	0.197468			Other
chr1	ENSG00000153904	DDAH1	0.15859	3	194	30	0.0132159	0.173913	3	213	37	0.0118577			Other
chr1	ENSG00000153936	HS2ST1	1.27391	53	0	177	0.230435	1.27459	54	0	190	0.221311			Other
chr1	ENSG00000154007	ASB17	0.154135	7	235	24	0.0263158	0.233051	8	190	38	0.0338983			Other
chr1	ENSG00000154027	AK5	0.154255	4	163	21	0.0212766	0.178571	5	166	25	0.0255102			Other
chr1	ENSG00000154222	CC2D1B	0.647436	28	87	41	0.179487	0.597701	19	94	61	0.109195			Other
chr1	ENSG00000154305	MIA3	0.492126	26	157	71	0.102362	0.549618	19	150	93	0.0725191			Other
chr1	ENSG00000154309	DISP1	0.280632	10	197	46	0.0395257	0.221757	6	194	39	0.0251046			Other
chr1	ENSG00000154342	WNT3A	0.385321	9	77	23	0.0825688	0.415094	8	71	27	0.0754717			Other
chr1	ENSG00000154358	OBSCN	0.272152	6	122	30	0.0379747	0.512346	18	106	38	0.111111			Other
chr1	ENSG00000154370	TRIM11	0.448454	18	128	48	0.0927835	0.484472	18	104	39	0.111801			Other
chr1	ENSG00000154380	ENAH	0.385827	16	177	61	0.0629921	0.356364	15	197	63	0.0545455			Other
chr1	ENSG00000154429	CCSAP	0.281863	19	315	74	0.0465686	0.307692	21	284	72	0.0557029			Other
chr1	ENSG00000154451	GBP5	0.206587	11	276	47	0.0329341	0.161994	5	275	41	0.0155763			Other
chr1	ENSG00000154511	FAM69A	0.608187	42	187	113	0.122807	0.640351	47	178	117	0.137427			Other
chr1	ENSG00000155363	MOV10	0.671296	29	108	79	0.134259	0.703704	32	92	65	0.169312			Other
chr1	ENSG00000155366	RHOC	0.977273	78	106	168	0.221591	1.06452	89	89	163	0.260997			Other
chr1	ENSG00000155367	PPM1J	0.460967	20	170	79	0.0743494	0.567114	36	180	82	0.120805			Other
chr1	ENSG00000155380	SLC16A1	0.490741	31	201	92	0.095679	0.442379	21	179	69	0.0780669			Other
chr1	ENSG00000155761	SPAG17	0.0934579	3	197	14	0.0140187	0.0434783	0	176	8	0			Other
chr1	ENSG00000155816	FMN2	0.045614	0	272	13	0	0.0679245	3	251	11	0.0113208			Other
chr1	ENSG00000156097	GPR61	1.05521	87	107	132	0.266871	1.09199	94	101	142	0.278932			Other
chr1	ENSG00000156150	ALX3	0.445876	33	257	98	0.0850515	0.442211	28	260	110	0.0703518			Other
chr1	ENSG00000156171	DRAM2	1.16019	101	69	242	0.245146	1.08579	95	81	197	0.254692			Other
chr1	ENSG00000156869	FRRS1	0.451493	24	175	69	0.0895522	0.540084	16	129	92	0.0675105			Other
chr1	ENSG00000156875	MFSD14A	0.702326	31	107	77	0.144186	0.622318	27	124	82	0.11588			Other
chr1	ENSG00000156876	SASS6	1.39367	75	6	140	0.339367	1.40249	85	9	147	0.352697			Other
chr1	ENSG00000157060	SHCBP1L	0.33795	15	262	84	0.0415512	0.296667	13	225	62	0.0433333			Other
chr1	ENSG00000157064	NMNAT2	0.271233	16	283	66	0.0438356	0.270492	15	283	68	0.0409836			Other
chr1	ENSG00000157077	ZFYVE9	0.505319	25	123	40	0.132979	0.391304	14	143	50	0.0676329			Other
chr1	ENSG00000157131	C8A	0.0782396	5	382	22	0.0122249	0.12938	7	331	33	0.0188679			Other
chr1	ENSG00000157181	ODR4	1.23267	43	9	150	0.212871	1.15152	33	10	155	0.166667			Other
chr1	ENSG00000157184	CPT2	0.674541	58	198	125	0.152231	0.709845	62	195	129	0.160622			Other
chr1	ENSG00000157191	NECAP2	1.02162	91	96	183	0.245946	1.19822	99	61	178	0.292899			Other
chr1	ENSG00000157193	LRP8	1.60667	132	0	168	0.44	1.60458	134	1	171	0.437908			Other
chr1	ENSG00000157211	CDCP2	0.328018	21	320	98	0.047836	0.33414	23	300	90	0.0556901			Other
chr1	ENSG00000157216	SSBP3	0.52	32	223	120	0.0853333	0.492268	37	247	104	0.0953608			Other
chr1	ENSG00000157330	C1orf158	0.248062	6	107	16	0.0465116	0.214765	5	123	21	0.033557			Other
chr1	ENSG00000157870	PRXL2B	1.15714	66	60	84	0.314286	1.04478	51	53	97	0.253731			Other
chr1	ENSG00000157873	TNFRSF14	0.702128	19	54	21	0.202128	0.880952	20	35	29	0.238095			Other
chr1	ENSG00000157881	PANK4	1.27907	58	35	79	0.337209	1.29814	59	35	67	0.36646			Other
chr1	ENSG00000157911	PEX10	0.679325	41	130	66	0.172996	0.594714	32	129	66	0.140969			Other
chr1	ENSG00000157916	RER1	1.79275	101	0	92	0.523316	1.62814	102	0	97	0.512563			Other
chr1	ENSG00000157933	SKI	0.557971	18	82	38	0.130435	0.731707	28	82	54	0.170732			Other
chr1	ENSG00000157978	LDLRAP1	0.723549	40	148	105	0.136519	0.66426	42	156	79	0.151625			Other
chr1	ENSG00000158006	PAFAH2	0.779703	69	192	143	0.170792	0.874359	77	169	144	0.197436			Other
chr1	ENSG00000158008	EXTL1	0.769886	64	173	115	0.181818	0.673529	50	178	112	0.147059			Other
chr1	ENSG00000158014	SLC30A2	0.65	52	197	111	0.144444	0.664021	57	204	117	0.150794			Other
chr1	ENSG00000158022	TRIM63	0.690037	38	140	93	0.140221	0.638211	38	146	62	0.154472			Other
chr1	ENSG00000158055	GRHL3	0.350299	20	242	72	0.0598802	0.379085	23	221	62	0.0751634			Other
chr1	ENSG00000158062	UBXN11	1.87119	256	4	167	0.599532	1.93801	238	14	119	0.641509			Other
chr1	ENSG00000158109	TPRG1L	0.532353	33	197	110	0.0970588	0.492593	25	175	70	0.0925926			Other
chr1	ENSG00000158156	XKR8	0.847222	59	131	98	0.204861	0.889262	69	133	96	0.231544			Other
chr1	ENSG00000158161	EYA3	1.02667	139	193	193	0.264762	1.05626	145	175	231	0.263158			Other
chr1	ENSG00000158195	WASF2	0.993243	39	63	46	0.263514	0.892086	28	63	48	0.201439			Other
chr1	ENSG00000158246	TENT5B	0.632558	33	120	62	0.153488	0.675676	24	85	39	0.162162			Other
chr1	ENSG00000158286	RNF207	1.19712	69	58	81	0.331731	1.20192	67	54	87	0.322115			Other
chr1	ENSG00000158292	GPR153	0.592	17	70	38	0.136	0.741379	21	56	39	0.181034			Other
chr1	ENSG00000158315	RHBDL2	0.512702	45	266	122	0.103926	0.482838	46	281	110	0.105263			Other
chr1	ENSG00000158473	CD1D	0.220745	12	307	57	0.0319149	0.275362	23	275	47	0.0666667			Other
chr1	ENSG00000158477	CD1A	0.2625	8	129	23	0.05	0.289474	8	149	33	0.0421053			Other
chr1	ENSG00000158481	CD1C	0.331034	21	227	42	0.0724138	0.316364	20	217	38	0.0727273			Other
chr1	ENSG00000158485	CD1B	0.253333	9	123	18	0.06	0.354167	9	107	28	0.0625			Other
chr1	ENSG00000158488	CD1E	0.205607	8	179	27	0.0373832	0.2	9	162	19	0.0473684			Other
chr1	ENSG00000158615	PPP1R15B	0.729032	54	165	91	0.174194	0.673913	51	158	67	0.184783			Other
chr1	ENSG00000158710	TAGLN2	0.590909	25	135	82	0.103306	0.62037	28	116	72	0.12963			Other
chr1	ENSG00000158711	ELK4	0.634831	43	189	124	0.120787	0.613208	36	170	112	0.113208			Other
chr1	ENSG00000158714	SLAMF8	0.35	23	247	70	0.0676471	0.404908	27	235	64	0.0828221			Other
chr1	ENSG00000158715	SLC45A3	0.554007	28	174	85	0.097561	0.521036	31	190	88	0.100324			Other
chr1	ENSG00000158716	DUSP23	0.364486	18	226	77	0.0560748	0.379791	23	208	56	0.0801394			Other
chr1	ENSG00000158747	NBL1	1.38551	134	8	286	0.313084	1.3683	136	14	279	0.317016			Other
chr1	ENSG00000158748	HTR6	0.359897	23	279	87	0.059126	0.426859	28	278	111	0.0671463			Other
chr1	ENSG00000158764	ITLN2	0.878289	74	135	95	0.243421	0.726384	48	156	103	0.156352			Other
chr1	ENSG00000158769	F11R	1.05818	74	96	105	0.269091	1.21341	111	110	107	0.338415			Other
chr1	ENSG00000158773	USF1	1.2875	84	76	80	0.35	1.30962	88	68	83	0.368201			Other
chr1	ENSG00000158786	PLA2G2F	0.285211	13	221	50	0.0457746	0.296029	10	207	60	0.0361011			Other
chr1	ENSG00000158793	NIT1	2.31076	173	0	78	0.689243	2.25556	185	0	85	0.685185			Other
chr1	ENSG00000158796	DEDD	1.5044	150	82	109	0.439883	1.39009	138	95	90	0.427245			Other
chr1	ENSG00000158816	VWA5B1	0.329897	11	212	68	0.0378007	0.343284	11	190	67	0.0410448			Other
chr1	ENSG00000158825	CDA	0.309645	19	297	78	0.0482234	0.340659	15	261	88	0.0412088			Other
chr1	ENSG00000158828	PINK1	0.396761	16	169	62	0.0647773	0.4	11	143	61	0.0511628			Other
chr1	ENSG00000158850	B4GALT3	1.54747	141	72	103	0.446203	1.46802	149	88	107	0.43314			Other
chr1	ENSG00000158859	ADAMTS4	1.97826	195	18	109	0.60559	2.0059	205	27	107	0.60472			Other
chr1	ENSG00000158864	NDUFS2	2.12027	198	14	79	0.680412	2.15185	173	11	86	0.640741			Other
chr1	ENSG00000158869	FCER1G	1.26234	140	109	136	0.363636	1.31903	144	100	129	0.386059			Other
chr1	ENSG00000158874	APOA2	1.66736	236	46	202	0.487603	1.69522	265	62	175	0.527888			Other
chr1	ENSG00000158882	TOMM40L	1.71247	244	44	185	0.515856	1.59926	266	86	192	0.488971			Other
chr1	ENSG00000158887	MPZ	1.5812	161	52	138	0.458689	1.53927	159	50	173	0.41623			Other
chr1	ENSG00000158966	CACHD1	0.0972222	0	130	14	0	0.123188	1	122	15	0.00724638			Other
chr1	ENSG00000159023	EPB41	0.633758	46	177	91	0.146497	0.648968	43	184	112	0.126844			Other
chr1	ENSG00000159164	SV2A	1.00402	71	87	91	0.285141	1.11741	72	67	108	0.291498			Other
chr1	ENSG00000159166	LAD1	0.309148	8	233	76	0.0252366	0.387205	20	207	70	0.0673401			Other
chr1	ENSG00000159173	TNNI1	0.365741	12	153	51	0.0555556	0.445596	16	127	50	0.0829016			Other
chr1	ENSG00000159176	CSRP1	0.347709	16	261	94	0.0431267	0.415698	24	235	85	0.0697674			Other
chr1	ENSG00000159189	C1QC	0.251232	3	155	45	0.0147783	0.333333	10	124	37	0.0584795			Other
chr1	ENSG00000159208	CIART	0.963883	115	177	151	0.259594	0.946903	120	180	152	0.265487			Other
chr1	ENSG00000159214	CCDC24	0.842857	56	112	112	0.2	0.80137	52	142	98	0.178082			Other
chr1	ENSG00000159339	PADI4	0.230088	11	186	29	0.0486726	0.191111	5	187	33	0.0222222			Other
chr1	ENSG00000159346	ADIPOR1	0.88	70	121	109	0.233333	0.885017	68	119	100	0.236934			Other
chr1	ENSG00000159348	CYB5R1	0.84106	62	136	104	0.205298	0.847751	60	121	108	0.207612			Other
chr1	ENSG00000159352	PSMD4	1.35102	95	71	79	0.387755	1.30736	80	71	80	0.34632			Other
chr1	ENSG00000159363	ATP13A2	0.400685	20	198	74	0.0684932	0.420833	18	162	60	0.075			Other
chr1	ENSG00000159377	PSMB4	0.955017	71	116	102	0.245675	0.967033	62	113	98	0.227106			Other
chr1	ENSG00000159388	BTG2	1.58844	139	0	155	0.472789	1.60345	131	0	159	0.451724			Other
chr1	ENSG00000159409	CELF3	0.755187	43	115	83	0.178423	0.65812	30	122	82	0.128205			Other
chr1	ENSG00000159423	ALDH4A1	0.532951	36	209	104	0.103152	0.43314	22	222	100	0.0639535			Other
chr1	ENSG00000159445	THEM4	0.517647	22	149	84	0.0862745	0.538462	25	145	77	0.101215			Other
chr1	ENSG00000159450	TCHH	0.228346	14	214	26	0.0551181	0.338346	18	201	47	0.0676692			Other
chr1	ENSG00000159455	LCE2B	0.167442	5	185	25	0.0232558	0.161905	6	183	21	0.0285714			Other
chr1	ENSG00000159479	MED8	1.63505	231	0	254	0.476289	1.63699	198	0	240	0.452055			Other
chr1	ENSG00000159516	SPRR2G	0.209877	14	276	34	0.0432099	0.21	11	251	38	0.0366667			Other
chr1	ENSG00000159527	PGLYRP3	0.309148	20	250	47	0.0630915	0.26935	11	248	64	0.0340557			Other
chr1	ENSG00000159588	CCDC17	0.746606	40	114	67	0.180995	0.666667	31	114	68	0.14554			Other
chr1	ENSG00000159592	GPBP1L1	1.61081	84	12	89	0.454054	1.5241	67	15	84	0.403614			Other
chr1	ENSG00000159596	TMEM69	1.71257	82	3	82	0.491018	1.6478	68	4	87	0.427673			Other
chr1	ENSG00000159658	EFCAB14	0.613636	23	96	57	0.130682	0.531073	14	104	59	0.079096			Other
chr1	ENSG00000160049	DFFA	1.52265	110	0	177	0.383275	1.55435	114	0	162	0.413043			Other
chr1	ENSG00000160050	CCDC28B	1.41742	134	62	137	0.402402	1.60191	152	62	100	0.484076			Other
chr1	ENSG00000160051	IQCC	1.84848	221	27	148	0.558081	2.11878	248	31	83	0.685083			Other
chr1	ENSG00000160055	TMEM234	2.03448	244	16	117	0.647215	2.05926	264	9	132	0.651852			Other
chr1	ENSG00000160058	BSDC1	1.05042	63	82	93	0.264706	1.05263	84	109	92	0.294737			Other
chr1	ENSG00000160062	ZBTB8A	0.469586	39	272	100	0.0948905	0.442857	34	275	111	0.0809524			Other
chr1	ENSG00000160072	ATAD3B	1.02174	46	60	78	0.25	1.11268	41	50	51	0.288732			Other
chr1	ENSG00000160075	SSU72	0.874172	69	130	103	0.228477	0.890966	75	139	107	0.233645			Other
chr1	ENSG00000160087	UBE2J2	1.92982	69	2	43	0.605263	1.86822	74	3	52	0.573643			Other
chr1	ENSG00000160094	ZNF362	0.846154	47	100	139	0.164336	0.77305	47	122	113	0.166667			Other
chr1	ENSG00000160097	FNDC5	0.510638	27	145	63	0.114894	0.534483	22	132	78	0.0948276			Other
chr1	ENSG00000160678	S100A1	1.04211	79	108	98	0.277193	1.19298	90	89	106	0.315789			Other
chr1	ENSG00000160679	CHTOP	1.64505	137	42	114	0.467577	1.53378	130	45	121	0.439189			Other
chr1	ENSG00000160685	ZBTB7B	1.43318	91	46	80	0.419355	1.32804	78	46	65	0.412698			Other
chr1	ENSG00000160688	FLAD1	1.26485	141	106	157	0.34901	1.46006	154	92	117	0.424242			Other
chr1	ENSG00000160691	SHC1	2.22603	208	7	77	0.712329	2.40214	216	3	62	0.768683			Other
chr1	ENSG00000160710	ADAR	1.14229	75	84	94	0.296443	1.0728	71	95	95	0.272031			Other
chr1	ENSG00000160712	IL6R	0.880466	71	156	116	0.206997	0.880117	74	161	107	0.216374			Other
chr1	ENSG00000160714	UBE2Q1	0.928205	95	165	130	0.24359	1.03523	109	143	117	0.295393			Other
chr1	ENSG00000160716	CHRNB2	1.07458	77	103	115	0.261017	1.05714	96	113	106	0.304762			Other
chr1	ENSG00000160741	CRTC2	1.7557	161	44	102	0.52443	1.4898	136	68	90	0.462585			Other
chr1	ENSG00000160752	FDPS	1.29679	128	100	146	0.342246	1.34309	143	109	124	0.380319			Other
chr1	ENSG00000160753	RUSC1	1.38182	108	73	94	0.392727	1.23656	94	75	110	0.336918			Other
chr1	ENSG00000160767	FAM189B	1.68827	160	60	104	0.493827	1.63194	134	52	102	0.465278			Other
chr1	ENSG00000160781	PAQR6	1.47644	81	49	61	0.424084	1.42208	55	52	47	0.357143			Other
chr1	ENSG00000160783	PMF1	2.35526	221	0	83	0.726974	2.2945	221	0	88	0.71521			Other
chr1	ENSG00000160785	SLC25A44	1.38756	166	109	143	0.397129	1.31762	145	110	148	0.359801			Other
chr1	ENSG00000160789	LMNA	1.60949	125	63	86	0.456204	1.65056	119	55	95	0.442379			Other
chr1	ENSG00000160803	UBQLN4	2.14428	253	12	137	0.629353	2.10251	278	12	149	0.633257			Other
chr1	ENSG00000160818	GPATCH4	1.385	74	56	70	0.37	1.25	71	61	80	0.334906			Other
chr1	ENSG00000160838	LRRC71	0.574405	52	208	76	0.154762	0.507331	36	225	80	0.105572			Other
chr1	ENSG00000160856	FCRL3	0.192893	7	168	22	0.035533	0.302222	16	175	34	0.0711111			Other
chr1	ENSG00000162365	CYP4A22	0.224299	6	92	9	0.0560748	0.294118	3	69	13	0.0352941			Other
chr1	ENSG00000162366	PDZK1IP1	0.32963	14	203	53	0.0518519	0.246269	9	213	46	0.0335821			Other
chr1	ENSG00000162367	TAL1	0.275641	13	244	55	0.0416667	0.332248	19	227	61	0.0618893			Other
chr1	ENSG00000162368	CMPK1	0.582031	31	144	81	0.121094	0.559671	31	146	66	0.127572			Other
chr1	ENSG00000162373	BEND5	0.109375	2	116	10	0.015625	0.0853659	3	153	8	0.0182927			Other
chr1	ENSG00000162374	ELAVL4	0.0818182	1	203	16	0.00454545	0.084507	3	198	12	0.0140845			Other
chr1	ENSG00000162377	COA7	0.584906	48	237	139	0.113208	0.626168	55	233	140	0.128505			Other
chr1	ENSG00000162378	ZYG11B	0.656992	49	194	136	0.129288	0.636132	51	216	126	0.129771			Other
chr1	ENSG00000162383	SLC1A7	0.379822	22	239	76	0.0652819	0.421384	31	221	66	0.0974843			Other
chr1	ENSG00000162384	C1orf123	0.696721	50	178	138	0.136612	0.68546	44	165	128	0.130564			Other
chr1	ENSG00000162385	MAGOH	0.708075	54	159	109	0.167702	0.731928	51	162	119	0.153614			Other
chr1	ENSG00000162390	ACOT11	0.298592	17	271	67	0.0478873	0.336257	13	242	87	0.0380117			Other
chr1	ENSG00000162391	FAM151A	0.330729	18	279	87	0.046875	0.350126	30	290	77	0.0755668			Other
chr1	ENSG00000162396	PARS2	0.454774	28	248	122	0.0703518	0.522959	41	243	108	0.104592			Other
chr1	ENSG00000162398	LEXM	0.830508	29	71	77	0.163842	0.779762	29	73	66	0.172619			Other
chr1	ENSG00000162399	BSND	0.291045	12	206	50	0.0447761	0.315254	21	223	51	0.0711864			Other
chr1	ENSG00000162402	USP24	0.772222	20	62	98	0.111111	0.899408	23	40	106	0.136095			Other
chr1	ENSG00000162407	PLPP3	0.156863	7	267	32	0.0228758	0.113475	3	254	25	0.0106383			Other
chr1	ENSG00000162408	NOL9	1.70093	157	17	147	0.489097	1.67007	148	18	128	0.503401			Other
chr1	ENSG00000162409	PRKAA2	0.156863	7	267	32	0.0228758	0.113475	3	254	25	0.0106383			Other
chr1	ENSG00000162413	KLHL21	1.94258	124	4	81	0.593301	1.82836	157	11	100	0.585821			Other
chr1	ENSG00000162415	ZSWIM5	1.72911	180	32	135	0.518732	1.8245	168	25	109	0.556291			Other
chr1	ENSG00000162419	GMEB1	0.899123	99	185	172	0.217105	0.849765	88	199	139	0.206573			Other
chr1	ENSG00000162426	SLC45A1	0.252475	18	322	64	0.0445545	0.252381	14	329	77	0.0333333			Other
chr1	ENSG00000162430	SELENON	0.672131	36	127	81	0.147541	0.820513	50	109	75	0.213675			Other
chr1	ENSG00000162433	AK4	0.184739	4	208	37	0.0160643	0.238683	5	192	46	0.0205761			Other
chr1	ENSG00000162434	JAK1	0.317204	11	139	36	0.0591398	0.289216	11	156	37	0.0539216			Other
chr1	ENSG00000162437	RAVER2	0.116883	4	208	19	0.017316	0.128889	5	201	19	0.0222222			Other
chr1	ENSG00000162438	CTRC	0.441281	24	188	69	0.0854093	0.427007	23	192	59	0.0839416			Other
[truncated: 26,335 more rows]
